# Supplementary material for: Genome-wide maps of alkylation damage, repair, and mutagenesis in yeast reveal mechanisms of mutational heterogeneity
Source: PubMed Central journal article supplement — Genome Res. 2017 Oct;27(10):1674–84. doi: 10.1101/gr.225771.117 (PMC5630031; doi:10.1101/gr.225771.117), 2017-10
Supplement: supp_gr.225771.117_Supplemental_Fig_S1.pdf [file supp_gr.225771.117_Supplemental_Fig_S1.pdf]

Supplemental Fig. S1

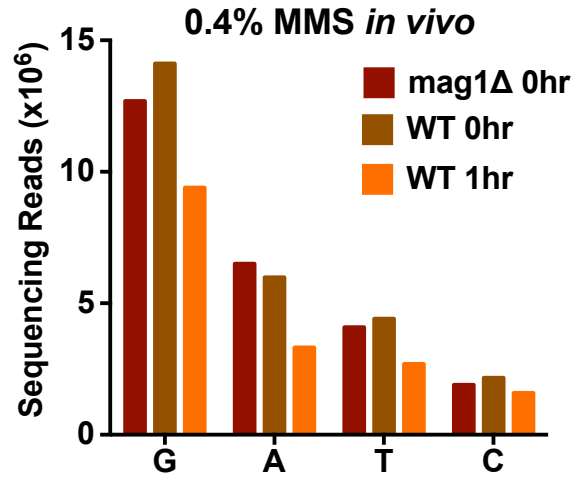

**Supplemental Figure S1.** Nucleotide distribution of lesion sites associated with NMP-seq sequencing reads for yeast strains (WT or *mag1Δ*) treated with 0.4% MMS for 10 minutes, and analyzed immediately (0hr) or allowed to repair for 1hr in fresh media without MMS.
