# Supplementary material for: Genome-wide maps of alkylation damage, repair, and mutagenesis in yeast reveal mechanisms of mutational heterogeneity
Source: PubMed Central journal article supplement — Genome Res. 2017 Oct;27(10):1674–84. doi: 10.1101/gr.225771.117 (PMC5630031; doi:10.1101/gr.225771.117), 2017-10
Supplement: supp_gr.225771.117_Supplemental_Fig_S2.pdf [file supp_gr.225771.117_Supplemental_Fig_S2.pdf]

Supplemental Fig. S2

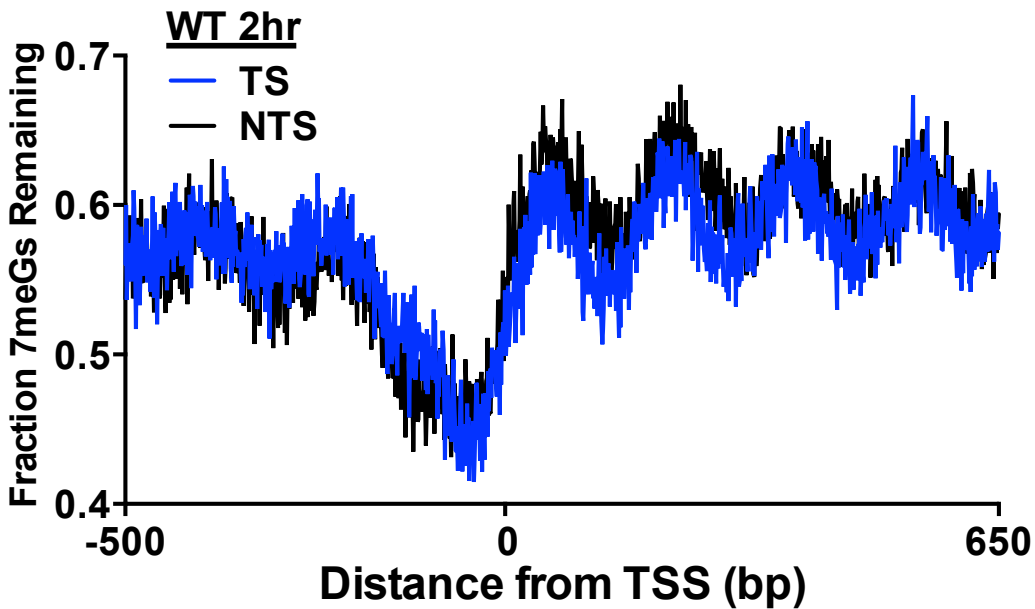

**Supplemental Figure S2.** Repair of 7meG lesions shows no obvious strand bias among yeast genes in WT cells. Fraction of 7meG lesions remaining following 2hr repair in WT cells relative to a matched 0hr *mag1* $\Delta$  control. Data is shown for DNA regions surrounding the transcription start site (TSS) of 5762 yeast genes. The transcribed strand (TS) is depicted in blue and the non-transcribed strand (NTS) is depicted in black.
