# Supplementary material for: Genome-wide maps of alkylation damage, repair, and mutagenesis in yeast reveal mechanisms of mutational heterogeneity
Source: PubMed Central journal article supplement — Genome Res. 2017 Oct;27(10):1674–84. doi: 10.1101/gr.225771.117 (PMC5630031; doi:10.1101/gr.225771.117), 2017-10
Supplement: supp_gr.225771.117_Supplemental_Fig_S3.pdf [file supp_gr.225771.117_Supplemental_Fig_S3.pdf]

### Supplemental Fig. S3

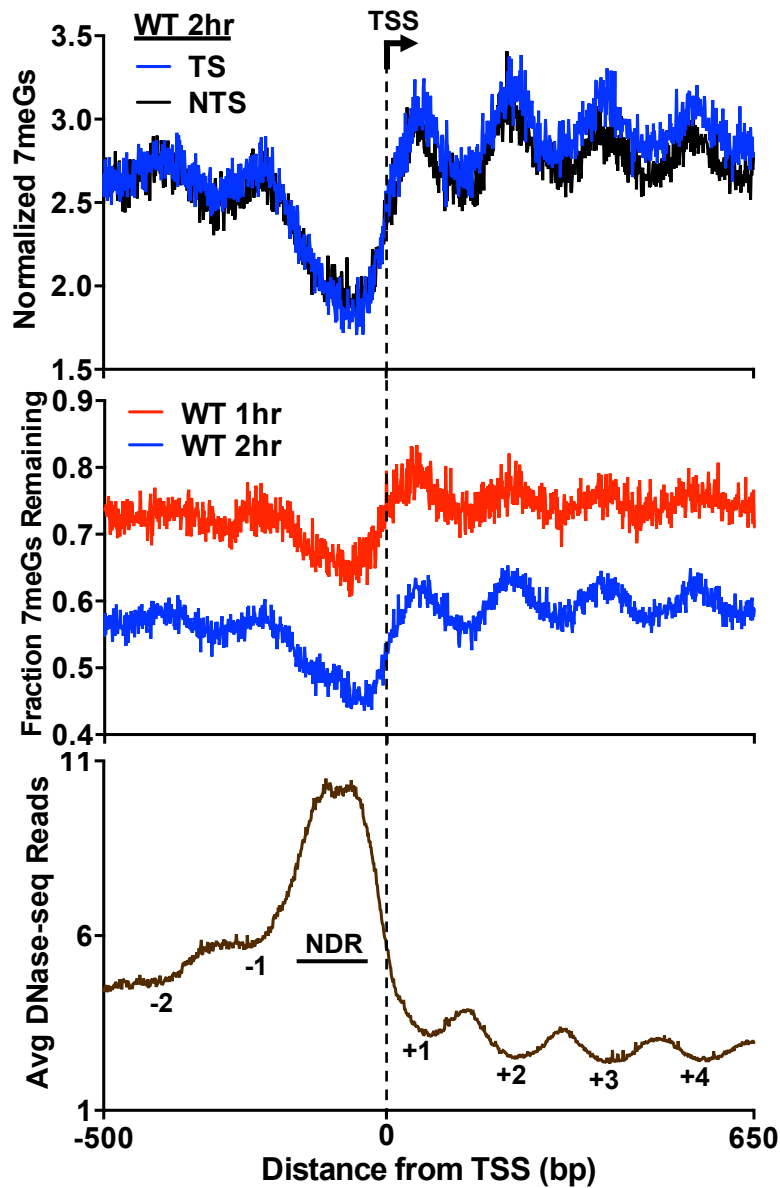

**Supplemental Figure S3.** Pattern of chromatin accessibility surrounding the transcription start sites (TSS) of 5762 yeast genes modulates repair of 7meG lesions. Top panel depicts the average number of 7meG lesions per G nucleotide following 2hr repair in WT yeast strain. Middle panel depicts the fraction of 7meG lesions remaining following 1hr or 2hr repair in WT relative to a matched 0hr *mag1Δ* control (data same as in Fig. 1C). Lower panel depicts the average number of DNA-seq reads (Zhong et al. 2016), which is a measure of chromatin accessibility.
