# Supplementary material for: Genome-wide maps of alkylation damage, repair, and mutagenesis in yeast reveal mechanisms of mutational heterogeneity
Source: PubMed Central journal article supplement — Genome Res. 2017 Oct;27(10):1674–84. doi: 10.1101/gr.225771.117 (PMC5630031; doi:10.1101/gr.225771.117), 2017-10
Supplement: supp_gr.225771.117_Supplemental_Fig_S4.pdf [file supp_gr.225771.117_Supplemental_Fig_S4.pdf]

## Supplemental Fig. S4

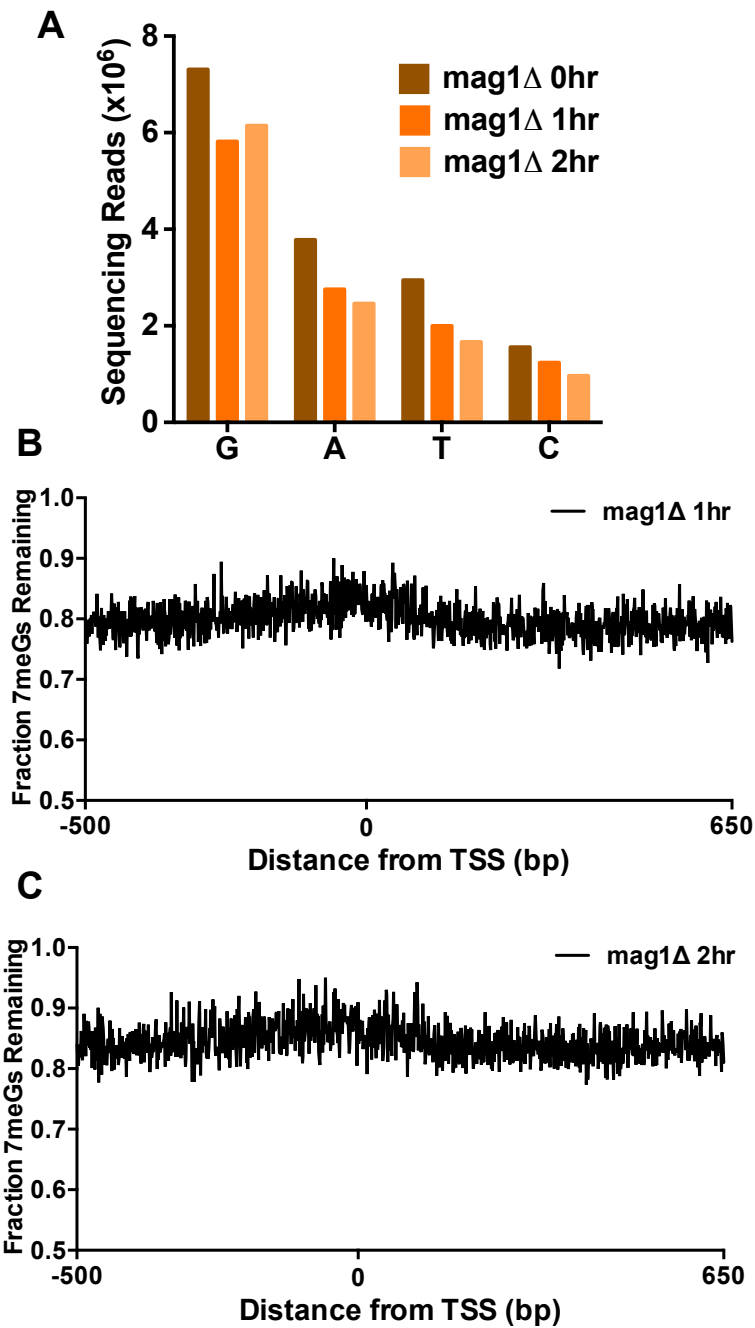

**Supplemental Figure S4.** Deletion of *MAG1* gene, which is responsible for initiating repair of 7meG lesions, eliminates patterns of repair surrounding yeast transcription start sites (TSS). (A) Nucleotide distribution of lesion sites associated with NMP-seq sequencing reads for *mag1* $\Delta$  repair time course. (B, C) Fraction of 7meG lesions remaining following 1hr or 2hr repair incubation in *mag1* $\Delta$  mutant strain relative to matched 0hr *mag1* $\Delta$  control. Data is plotted for DNA regions surrounding TSS of 5762 yeast genes.
