# Supplementary material for: Genome-wide maps of alkylation damage, repair, and mutagenesis in yeast reveal mechanisms of mutational heterogeneity
Source: PubMed Central journal article supplement — Genome Res. 2017 Oct;27(10):1674–84. doi: 10.1101/gr.225771.117 (PMC5630031; doi:10.1101/gr.225771.117), 2017-10
Supplement: supp_gr.225771.117_Supplemental_Fig_S5.pdf [file supp_gr.225771.117_Supplemental_Fig_S5.pdf]

## Supplemental Fig. S5

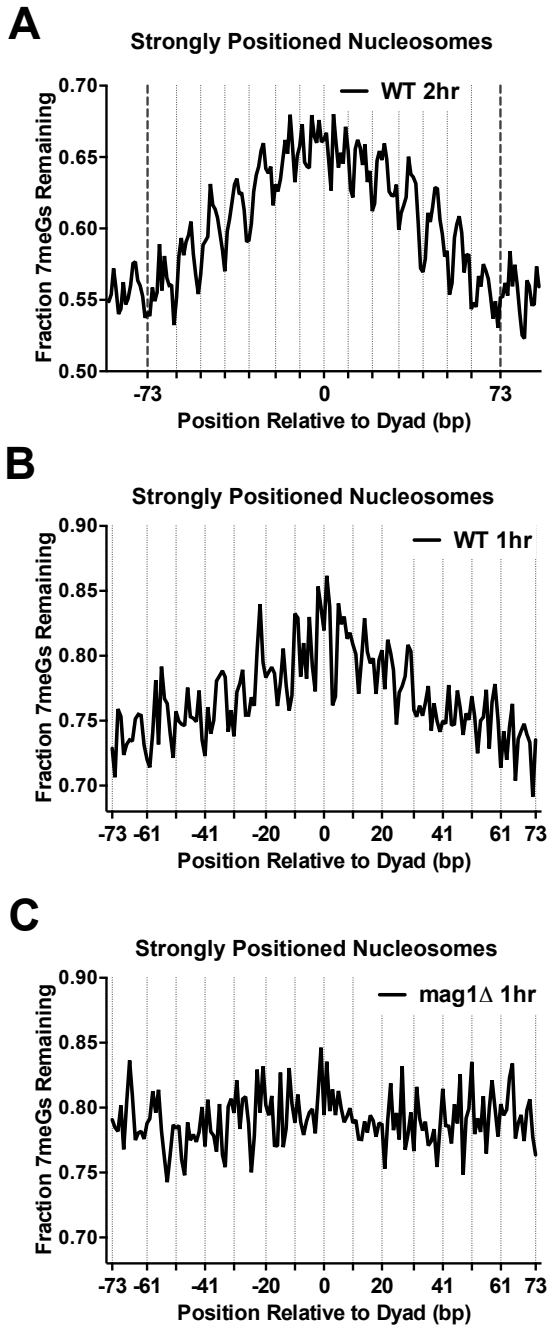

**Supplemental Figure S5.** Strongly positioned nucleosomes modulate repair of 7meG lesions in WT but not *mag1Δ* strains. (A) Fraction of 7meG lesions remaining in ~10,000 strongly positioned nucleosomes (nucleosome score > 5) following 2hr repair in WT cells relative to 0hr *mag1Δ* control. Nucleosomes overlapping with the *MAG1* gene, which is deleted in the *mag1Δ* control strain, were excluded from this analysis. 'Out' rotational settings are indicated by dashed lines. Includes 16 nucleotides of flanking DNA beyond each nucleosome boundary (i.e., -73 and +73). (B) Fraction of 7meG lesions remaining following 1hr repair in WT cells relative to 0hr

*mag1* $\Delta$  control among ~10,000 strongly positioned nucleosomes. (C) Same as in part B, except for 1hr repair in *mag1* $\Delta$  mutant cells.
