# Supplementary material for: Genome-wide maps of alkylation damage, repair, and mutagenesis in yeast reveal mechanisms of mutational heterogeneity
Source: PubMed Central journal article supplement — Genome Res. 2017 Oct;27(10):1674–84. doi: 10.1101/gr.225771.117 (PMC5630031; doi:10.1101/gr.225771.117), 2017-10
Supplement: supp_gr.225771.117_Supplemental_Fig_S7.pdf [file supp_gr.225771.117_Supplemental_Fig_S7.pdf]

## Supplemental Fig. S7

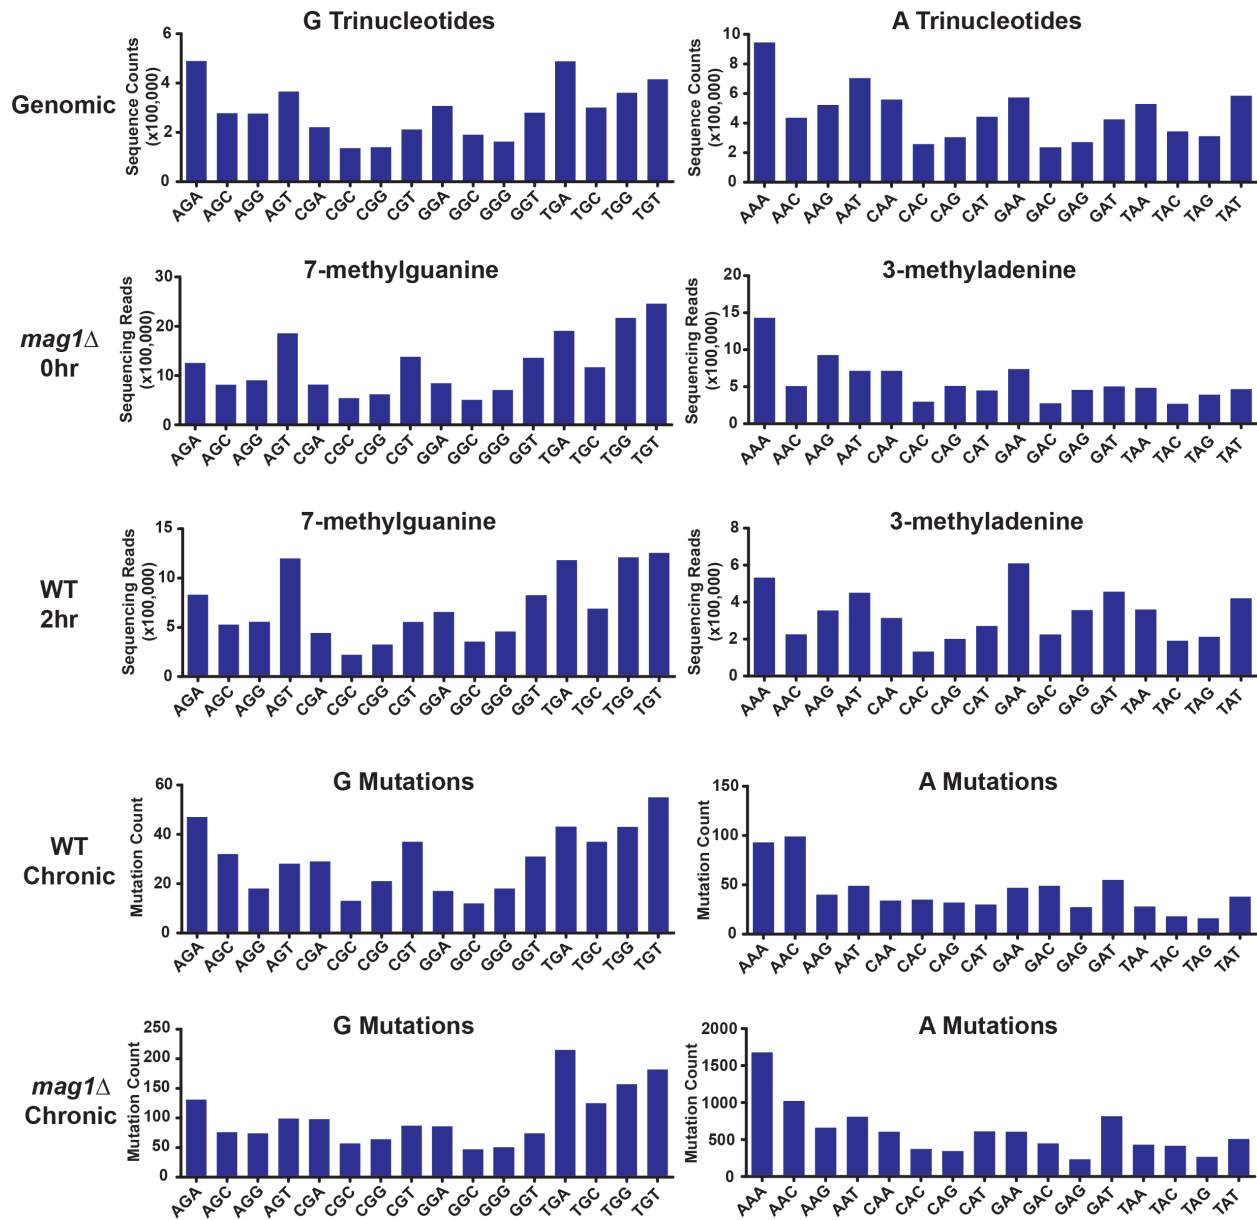

**Supplemental Figure S7.** Trinucleotide sequences in the yeast genome (Genomic) with either A or G as the center nucleotide were counted to determine the relative abundance of potential sequences to be damaged or mutated. MMS-induced lesions (3-methyladenine and 7-methylguanine) and mutations (A-mutations and G-mutations) were counted with respect to their trinucleotide context in WT and *mag1Δ* yeast, and were then compared to the genomic distribution using a Pearson correlation test. Complementary sequences counted together.
