# Supplementary material for: Genome-wide maps of alkylation damage, repair, and mutagenesis in yeast reveal mechanisms of mutational heterogeneity
Source: PubMed Central journal article supplement — Genome Res. 2017 Oct;27(10):1674–84. doi: 10.1101/gr.225771.117 (PMC5630031; doi:10.1101/gr.225771.117), 2017-10
Supplement: supp_gr.225771.117_Supplemental_Fig_S8.pdf [file supp_gr.225771.117_Supplemental_Fig_S8.pdf]

## Supplemental Fig. S8

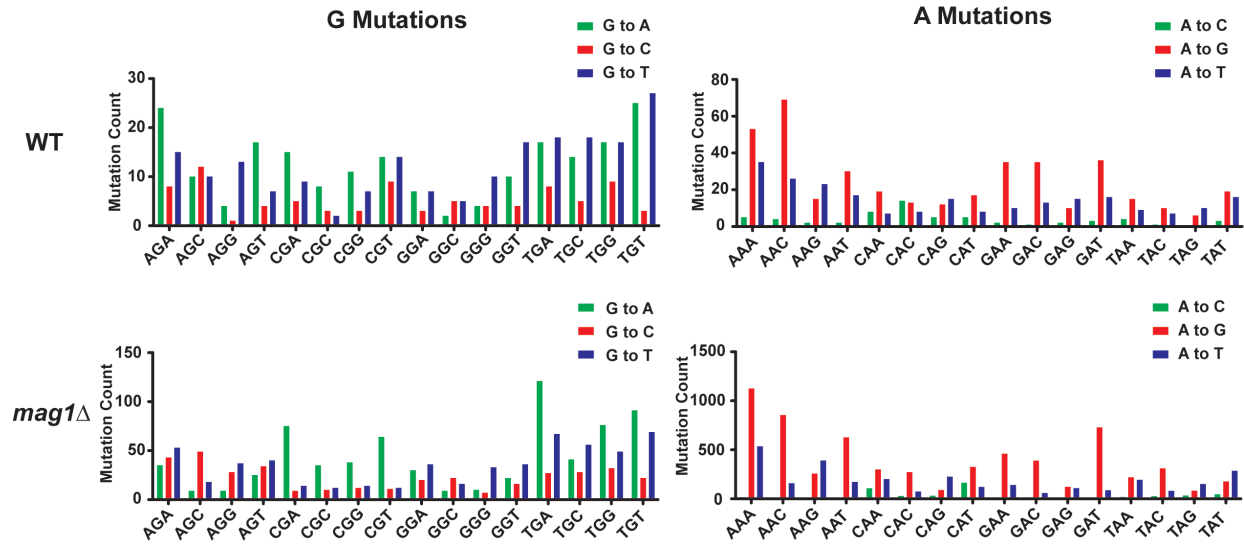

**Supplemental Figure S8.** The base substitution pattern of MMS-induced mutations in WT and *mag1*Δ yeast was determined for each of 32 possible trinucleotide contexts.
