# Supplementary material for: Genome-wide maps of alkylation damage, repair, and mutagenesis in yeast reveal mechanisms of mutational heterogeneity
Source: PubMed Central journal article supplement — Genome Res. 2017 Oct;27(10):1674–84. doi: 10.1101/gr.225771.117 (PMC5630031; doi:10.1101/gr.225771.117), 2017-10
Supplement: supp_gr.225771.117_Supplemental_Fig_S11.pdf [file supp_gr.225771.117_Supplemental_Fig_S11.pdf]

## Supplemental Fig. S11

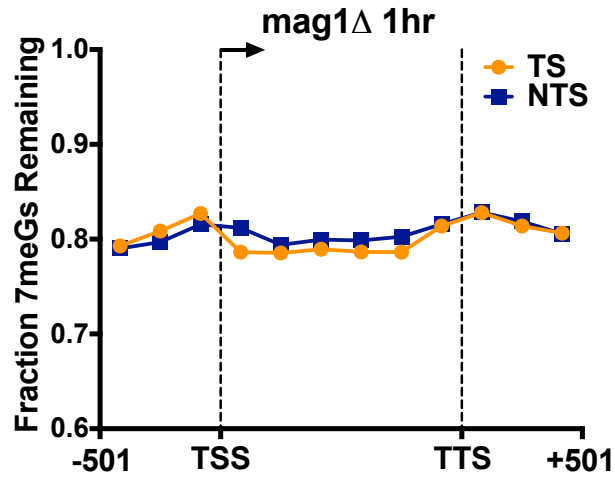

**Supplemental Figure S11.** No significant transcription-coupled repair of 7meG lesions from the transcribed strand (TS) relative to the non-transcribed strand (NTS) in a BER deficient *mag1Δ* strain following 1hr repair incubation. Fraction of 7meG lesions remaining in a *mag1Δ* 1hr sample relative to *mag1Δ* 0hr control was plotted for bins spanning 501 bp upstream of the transcription start site (TSS), the transcribed region of the gene, and 501 bp downstream of transcription termination site (TTS) for 5762 yeast genes.
