# Supplementary material for: Genome-wide maps of alkylation damage, repair, and mutagenesis in yeast reveal mechanisms of mutational heterogeneity
Source: PubMed Central journal article supplement — Genome Res. 2017 Oct;27(10):1674–84. doi: 10.1101/gr.225771.117 (PMC5630031; doi:10.1101/gr.225771.117), 2017-10
Supplement: supp_gr.225771.117_Supplemental_Fig_S12.pdf [file supp_gr.225771.117_Supplemental_Fig_S12.pdf]

## Supplemental Fig. S12

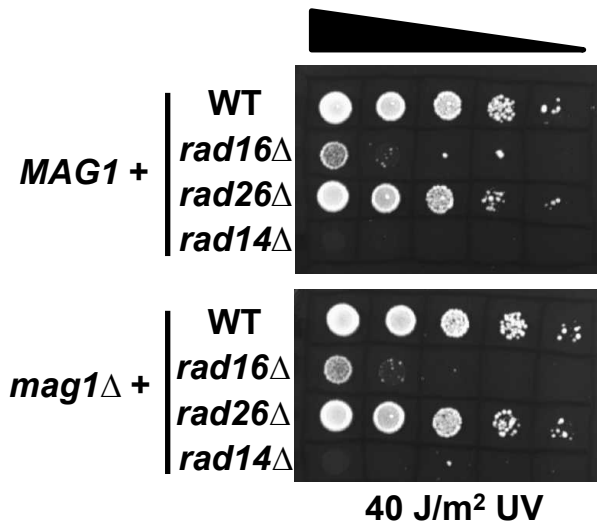

**Supplemental Figure S12.** UV sensitivity of single and double mutants in BER (*mag1* $\Delta$ ) and NER (*rad16* $\Delta$ , *rad26* $\Delta$ , and *rad14* $\Delta$ ) pathways. Yeast strains were irradiated with 40 J/m<sup>2</sup> of UVC light. The *rad16* $\Delta$ , which causes a defect in GG-NER, and the *rad14* $\Delta$  mutant, which cause a complete loss of NER, show significant sensitivity to UV light. In contrast, the *rad26* $\Delta$  mutant, which causes a defect in TC-NER, does not significantly affect UV sensitivity, since the GG-NER pathway is still intact.
