# Supplementary material for: Genome-wide maps of alkylation damage, repair, and mutagenesis in yeast reveal mechanisms of mutational heterogeneity
Source: PubMed Central journal article supplement — Genome Res. 2017 Oct;27(10):1674–84. doi: 10.1101/gr.225771.117 (PMC5630031; doi:10.1101/gr.225771.117), 2017-10
Supplement: supp_gr.225771.117_Supplemental_Table_S1.pdf [file supp_gr.225771.117_Supplemental_Table_S1.pdf]

**Supplemental Table S1:** The effect of rotational setting on repair is asymmetric relative to the nucleosome dyad.

|                         | <b><u>Relative Difference (In vs. Out Rotational Setting)</u></b> |                   |
|-------------------------|-------------------------------------------------------------------|-------------------|
|                         | <b>5' of Dyad</b>                                                 | <b>3' of Dyad</b> |
| Fraction 7meG remaining | 14.4% ± 1.4% <sup>a</sup>                                         | 10.0% ± 0.8%      |
| DNase-seq reads         | -37.4% ± 2.8%                                                     | -25.7% ± 2.8%     |

<sup>a</sup>Mean ± SEM is depicted
