# Supplementary material for: Genome-wide maps of alkylation damage, repair, and mutagenesis in yeast reveal mechanisms of mutational heterogeneity
Source: HighWire-hosted journal article supplement (doi:10.1101/gr.225771.117), 2017-09-14
Supplement: Supplemental_Table_S2.xlsx [file Supplemental_Table_S2.xlsx]

## Sheet: Leg_S2
Supplementary Table S2: Mutations Identified by Yeast Whole Genome Sequencing.
1Selected Element = A sequenced isolate 2Mapping = Chromosome 3“Variation Type” indicates the type of mutation. SNP = base pair substitution; DIP = an insertion or deletion

## Sheet: Tab_S2
Supplementary Table S2: All Mutations Identified by Yeast Whole Genome Sequencing.
Listed are all mutations identified by Illumina sequencing of the 48 yeast isolates chronically treated with MMS.
Selected Element1	Origin	Genotype	Mating Type	Ploidy	Mapping2	Reference Position	Consensus Position	Variation Type3	Length	Reference	Mutation	Variants	Allele Variations	Frequencies	Counts	Coverage	Variant #1	Frequency of #1	Count of #1	Variant #2	Frequency of #2	Count of #2	Left Flank, Reference	Right Flank, Reference	Left Flank, Consensus	Rigth Flank, Consensus
BY4743_10-1	BY4743	WT	a/α	2n	I	64731	64610	SNP	1	G	T	2	T/G	50.6/49.4	88/86	174	T	50.5747	88	G	49.4253	86	AATCATACCGCAAAACAACC	GTCATTAAATATAACATGGG	AATCATACCGCAAAACAACC	GTCATTAAATATAACATGGG
BY4743_10-1	BY4743	WT	a/α	2n	II	131846	130059	SNP	1	C	G	2	C/G	51.1/48.9	71/68	139	C	51.0791	71	G	48.9209	68	AACTCGTTCAAGTTCAAAAA	CCTTTATTGTCTATATCGAC	AACTCGTTCAAGTTCAAAAA	CCTTTATTGTCTATATCGAC
BY4743_10-1	BY4743	WT	a/α	2n	II	549058	545819	SNP	1	C	T	2	C/T	50.0/50.0	70/70	140	C	50	70	T	50	70	GCGCACAAATTTTGTAAATC	CCTACTAATTTAATTTGAAT	GCGCACAAATTTTGTAAATC	CCTACTAATTTAATTTGAAT
BY4743_10-1	BY4743	WT	a/α	2n	II	612835	609596	SNP	1	T	A	2	T/A	52.5/47.5	73/66	139	T	52.518	73	A	47.482	66	TTGCAAGTAGGCTGGGAATC	GTGCAAGTATTGGTCGAATG	TTGCAAGTAGGCTGGGAATC	GTGCAAGTATTGGTCGAATG
BY4743_10-1	BY4743	WT	a/α	2n	II	619609	616370	SNP	1	C	G	2	C/G	51.4/48.0	76/71	148	C	51.3514	76	G	47.973	71	TCAGTATGCAGAGGTGGAAT	CTATCATAACATGTGTCGTT	TCAGTATGCAGAGGTGGAAT	CTATCATAACATGTGTCGTT
BY4743_10-1	BY4743	WT	a/α	2n	III	52053	51686	SNP	1	C	G	1	G	96.1	73	76	G	96.0526	73				CCACTCCAACAGAGCGTGTT	AAATTCAAAAATTGGTGCGC	CCACTCCAACAGAGCGTGTT	AAATTCAAAAATTGGTGCGC
BY4743_10-1	BY4743	WT	a/α	2n	III	292249	281128	SNP	1	C	A	1	A	96.7	89	92	A	96.7391	89				ATTATGGAAACGAACTTGCT	CTAAAAAAAATTTAAAGTTT	ATTATGGAAACGAACTTGCT	TAAAAAAAAATTTAAAGTTT
BY4743_10-1	BY4743	WT	a/α	2n	IV	134395	132303	SNP	1	A	G	2	A/G	52.4/47.6	87/79	166	A	52.4096	87	G	47.5904	79	TTTGGCTAACCCATCTACCT	CGAAATCTTGGACCCTCACG	TTTGGCTAACCCATCTACCT	CGAAATCTTGGACCCTCACG
BY4743_10-1	BY4743	WT	a/α	2n	IV	193573	191481	SNP	1	T	A	2	A/T	53.3/46.7	80/70	150	A	53.3333	80	T	46.6667	70	GTATTTGATCAATGGGTCTG	CTCAAGATGTTTTACGGAGC	GTATTTGATCAATGGGTCTG	CTCAAGATGTTTTACGGAGC
BY4743_10-1	BY4743	WT	a/α	2n	IV	277928	275836	SNP	1	A	G	2	A/G	50.0/50.0	81/81	162	A	50	81	G	50	81	TGAGTATTGCTGGCGCTAAG	AACCATTCATTCGTAATGTG	TGAGTATTGCTGGCGCTAAG	AACCATTCATTCGTAATGTG
BY4743_10-1	BY4743	WT	a/α	2n	V	42313	42310	SNP	1	A	G	2	A/G	53.8/46.2	112/96	208	A	53.8462	112	G	46.1538	96	TAAGTGCATAGTAGGCACAG	CCTGATCTGTCGGGTGCAGT	TAAGTGCATAGTAGGCACAG	CCTGATCTGTCGGGTGCAGT
BY4743_10-1	BY4743	WT	a/α	2n	V	44445	44442	SNP	1	A	G	2	G/A	52.5/47.5	114/103	217	G	52.5346	114	A	47.4654	103	ATTTATTTCGAAGCAAATGG	CATGGTACGATTATATTCAG	ATTTATTTCGAAGCAAATGG	CATGGTACGATTATATTCAG
BY4743_10-1	BY4743	WT	a/α	2n	V	266569	265469	SNP	1	C	G	2	G/C	53.2/46.8	74/65	139	G	53.2374	74	C	46.7626	65	ATGTTGTAGATGATGAAGGC	CAACTTGCACCCAACTCGAA	ATGTTGTAGATGATGAAGGC	CAACTTGCACCCAACTCGAA
BY4743_10-1	BY4743	WT	a/α	2n	V	346303	345202	SNP	1	C	A	2	A/C	50.0/50.0	94/94	188	A	50	94	C	50	94	AGTCTTCAGGTTTTTCAACA	AGCTTATTATAGCCTGCATA	AGTCTTCAGGTTTTTCAACA	AGCTTATTATAGCCTGCATA
BY4743_10-1	BY4743	WT	a/α	2n	VI	5725	5478	SNP	1	A	G	2	G/A	52.3/47.7	81/74	155	G	52.2581	81	A	47.7419	74	TAAAACGAATAATTTTTACT	TAAGGCCTCCCATCCGTGCT	TAAAACGAATAATTTTTACT	TAAGGCCTCCCATCCGTGCT
BY4743_10-1	BY4743	WT	a/α	2n	VI	254161	249257	SNP	1	C	T	2	T/C	53.8/46.2	92/79	171	T	53.8012	92	C	46.1988	79	CTTTTCAAAAGCTTGTTGAC	AGGTCTTGGAGATTGTTCGT	CTTTTCAAAAGCTTGTTGAC	AGGTCTTGGAGATTGTTCGT
BY4743_10-1	BY4743	WT	a/α	2n	VII	883395	869704	SNP	1	G	A	2	A/G	51.3/48.7	80/76	156	A	51.2821	80	G	48.7179	76	AAACAATCTTCAAGTCAGAA	TGTATTTTTCTTCGTTAACA	AAACAATCTTCAAGTCAGAA	TGTATTTTTCTTCGTTAACA
BY4743_10-1	BY4743	WT	a/α	2n	IX	156411	140919	SNP	1	T	C	2	T/C	52.8/47.2	85/76	161	T	52.795	85	C	47.205	76	TAGGTGATACTTCTGAAGAT	TGAGAAAGAACATCTATGAA	TAGGTGATACTTCTGAAGAT	TGAGAAAGAACATCTATGAA
BY4743_10-1	BY4743	WT	a/α	2n	X	324055	310805	SNP	1	G	T	2	G/T	54.1/45.9	72/61	133	G	54.1353	72	T	45.8647	61	GCGAGGAATTAACCACTTTA	GTAACATTTGCGTCAAGCAC	GCGAGGAATTAACCACTTTA	GTAACATTTGCGTCAAGCAC
BY4743_10-1	BY4743	WT	a/α	2n	X	498699	480327	SNP	1	G	T	2	G/T	52.8/47.2	85/76	161	G	52.795	85	T	47.205	76	ACATTTTAATTACCACGTAC	TTGGGTTAAGAATACATTCA	ACATTTTAATTACCACGTAC	TTGGGTTAAGAATACATTCA
BY4743_10-1	BY4743	WT	a/α	2n	XI	2195	2196	SNP	1	T	C	2	C/T	50.7/49.3	106/103	209	C	50.7177	106	T	49.2823	103	TGACCATTATATTTGTTTTG	TTCTTAGTGCTGATATAAGC	TGACCATTATATTTGTTTTG	TTCTTAGTGCTGATATAAGC
BY4743_10-1	BY4743	WT	a/α	2n	XI	146471	146475	SNP	1	A	T	2	A/T	52.3/47.7	81/74	155	A	52.2581	81	T	47.7419	74	CGTCAACGATCTAAGAAAAA	CGTCTCTCTTAACCGTGGTA	CGTCAACGATCTAAGAAAAA	CGTCTCTCTTAACCGTGGTA
BY4743_10-1	BY4743	WT	a/α	2n	XI	292661	292665	SNP	1	C	A	2	C/A	52.3/47.0	79/71	151	C	52.3179	79	A	47.0199	71	GAAGTATGCATTCACCCTTC	TCGAGAGGGCTGTTTTTATC	GAAGTATGCATTCACCCTTC	TCGAGAGGGCTGTTTTTATC
BY4743_10-1	BY4743	WT	a/α	2n	XII	374421	365457	SNP	1	G	T	2	G/T	52.7/47.3	78/70	148	G	52.7027	78	T	47.2973	70	TTCCAGGTTCAAGTCCTGGC	GGGAAGATTTTTTTGCTCCG	TTCCAGGTTCAAGTCCTGGC	GGGAAGATTTTTTTGCTCCG
BY4743_10-1	BY4743	WT	a/α	2n	XII	489400	448810	SNP	1	G	T	2	T/G	52.0/48.0	26/24	50	T	52	26	G	48	24	TTCCCGTCCGATCAACTGTA	TTAAGCTGGTAAGAGCCTGA	TTCCCGTCCGATCAACTGTA	TTAAGCTGGTAAGAGCCTGA
BY4743_10-1	BY4743	WT	a/α	2n	XII	656991	612661	SNP	1	A	G	1	G	99.1	113	114	G	99.1228	113				GCTAAGGGAGCGCGCTACCG	CTACGCCACACGCCCAATTT	GCTAAGGGAGCGCGCTACCG	CTACGCCACACGCCCAATTT
BY4743_10-1	BY4743	WT	a/α	2n	XII	737497	693167	SNP	1	T	C	1	C	100	119	119	C	100	119				TCTAGTCAAGTTGGAGACTG	CGCAAGACCACGAACAATGG	TCTAGTCAAGTTGGAGACTG	CGCAAGACCACGAACAATGG
BY4743_10-1	BY4743	WT	a/α	2n	XIV	20444	15259	SNP	1	A	G	2	G/A	53.2/46.8	99/87	186	G	53.2258	99	A	46.7742	87	ATACCACCTATATCATCCCA	GTTACGTTAGGGATTTGTGG	ATACCACCTATATCATCCCA	GTTACGTTAGGGATTTGTGG
BY4743_10-1	BY4743	WT	a/α	2n	XIV	443899	438228	SNP	1	T	C	2	C/T	53.4/46.6	79/69	148	C	53.3784	79	T	46.6216	69	TCATTCATAACAAAAAAGGG	TTGTGATTCTTCTCCTTGGG	TCATTCATAACAAAAAAGGG	TTGTGATTCTTCTCCTTGGG
BY4743_10-1	BY4743	WT	a/α	2n	XIV	453395	447724	SNP	1	A	G	2	A/G	50.3/49.7	74/73	147	A	50.3401	74	G	49.6599	73	ACTTTGTGCGAGATGGCCAG	TACAAGCATCGAAAAAAGAC	ACTTTGTGCGAGATGGCCAG	TACAAGCATCGAAAAAAGAC
BY4743_10-1	BY4743	WT	a/α	2n	XV	431526	428410	SNP	1	A	G	2	A/G	54.7/45.3	64/53	117	A	54.7009	64	G	45.2991	53	AAACTGTGGGAGTAGTATAA	AAGACTGTGCATAATTCTGG	AAACTGTGGGAGTAGTATAA	AAGACTGTGCATAATTCTGG
BY4743_10-1	BY4743	WT	a/α	2n	XV	643421	637003	SNP	1	C	T	2	T/C	50.7/49.3	71/69	140	T	50.7143	71	C	49.2857	69	GATCCGCCCAGGAATCCCGA	ATCATGTCTTGTAGGAAATT	GATCCGCCCAGGAATCCCGA	ATCATGTCTTGTAGGAAATT
BY4743_10-1	BY4743	WT	a/α	2n	XV	780252	772816	SNP	1	C	A	2	C/A	50.7/49.3	69/67	136	C	50.7353	69	A	49.2647	67	ATTTAATTCAACCATTGCAG	AGCTTTTGACTAACACATTC	ATTTAATTCAACCATTGCAG	AGCTTTTGACTAACACATTC
BY4743_10-1	BY4743	WT	a/α	2n	XV	1040386	1032584	SNP	1	G	A	2	G/A	50.5/49.5	98/96	194	G	50.5155	98	A	49.4845	96	ACACTAAGAGACAGCCTTTG	GTGTTTGTGGGCAGATTATT	ACACTAAGAGACAGCCTTTG	GTGTTTGTGGGCAGATTATT
BY4743_10-1	BY4743	WT	a/α	2n	XV	1044043	1036241	SNP	1	G	A	2	A/G	51.7/48.3	90/84	174	A	51.7241	90	G	48.2759	84	CTTGGGAAGCTGTCATTCTT	GTAGAATATGAAGGCTTTGA	CTTGGGAAGCTGTCATTCTT	GTAGAATATGAAGGCTTTGA
BY4743_10-1	BY4743	WT	a/α	2n	XVI	601354	586351	SNP	1	T	C	2	C/T	51.1/48.9	71/68	139	C	51.0791	71	T	48.9209	68	TTGACTATTTGAGTGGCAGT	TCATTGGCTTGTTGTATGTT	TTGACTATTTGAGTGGCAGT	TCATTGGCTTGTTGTATGTT
BY4743_10-1	BY4743	WT	a/α	2n	III	292251	281130	DIP	1	-	A	1	A	85.4	82	96	A	85.4167	82				TATGGAAACGAACTTGCTCT	AAAAAAAATTTAAAGTTTTA	TATGGAAACGAACTTGCTAT	AAAAAAAATTTAAAGTTTTA
BY4743_10-1	BY4743	WT	a/α	2n	XIV	777554	771446	DIP	2	AT	--	1	--	45.3	73	161	--	45.3416	73				GTTTCACAATACAGAAACTA	ATATATATATATATATATAT	GTTTCACAATACAGAAACTA	ATATATATATATATATATAT
BY4743_10-1	BY4743	WT	a/α	2n	Mito	35560	35561	DIP	1	-	T	1	T	76.9	1123	1461	T	76.8652	1123				CAATTATATATATATATATA	TTTTTTTTTAATACAAATAA	CAATTATATATATATATATA	TTTTTTTTTAATACAAATAA
BY4743_10-10	BY4743	WT	a/α	2n	I	4851	4851	SNP	1	C	A	2	C/A	50.5/49.5	53/52	105	C	50.4762	53	A	49.5238	52	AGCTAATTTTTATAGGTCGA	CCTTCTGTCGCTTACTGGGT	AGCTAATTTTTATAGGTCGA	CCTTCTGTCGCTTACTGGGT
BY4743_10-10	BY4743	WT	a/α	2n	I	37009	36830	SNP	1	A	G	1	G	55.4	82	148	G	55.4054	82				GGAGGGTTGTCTGTGCAGGC	AAAAGTGCTAGTGAAGGTAA	GGAGGGTTGTCTGTGCAGGC	AAAAGTGCTAGTGAAGGTAA
BY4743_10-10	BY4743	WT	a/α	2n	I	142293	142109	SNP	1	T	C	1	C	57.8	52	90	C	57.7778	52				ACTTTATAGATCGTTGTTTT	CTTTCTTTTTTTTTTTTCCT	ACTTTATAGATCGTTGTTTT	CTTTCTTTTTTTTTTTTCCT
BY4743_10-10	BY4743	WT	a/α	2n	II	23282	21483	SNP	1	G	T	2	G/T	52.5/47.5	73/66	139	G	52.518	73	T	47.482	66	GCTGTAGGAGTTTGTGAATT	GACCTCGCTTGACTGCCCAT	GCTGTAGGAGTTTGTGAATT	GACCTCGCTTGACTGCCCAT
BY4743_10-10	BY4743	WT	a/α	2n	II	27298	25499	SNP	1	T	C	2	C/T	52.7/47.3	68/61	129	C	52.7132	68	T	47.2868	61	ATGTCCGTAAATCGGGTTGG	TTTTTAACGGATACTATAAC	ATGTCCGTAAATCGGGTTGG	TTTTTAACGGATACTATAAC
BY4743_10-10	BY4743	WT	a/α	2n	II	464785	461202	SNP	1	T	A	2	T/A	50.9/48.3	59/56	116	T	50.8621	59	A	48.2759	56	TTGAGCACCAAAAGATAGGG	TTCTTGAATCTCTATTAACA	TTGAGCACCAAAAGATAGGG	TTCTTGAATCTCTATTAACA
BY4743_10-10	BY4743	WT	a/α	2n	II	506141	502558	SNP	1	A	G	2	G/A	50.7/49.3	69/67	136	G	50.7353	69	A	49.2647	67	AACACCATGAATCTTTACGA	CAGGCCTTGACTGAAGTCTT	AACACCATGAATCTTTACGA	CAGGCCTTGACTGAAGTCTT
BY4743_10-10	BY4743	WT	a/α	2n	II	557835	554252	SNP	1	T	C	2	T/C	50.9/49.1	56/54	110	T	50.9091	56	C	49.0909	54	TTTGCCGGTTGTGATGTTGA	GATGCCGGTATTTGGGAATT	TTTGCCGGTTGTGATGTTGA	GATGCCGGTATTTGGGAATT
BY4743_10-10	BY4743	WT	a/α	2n	II	645237	641654	SNP	1	A	T	2	A/T	52.3/47.7	78/71	149	A	52.349	78	T	47.651	71	GGTTCGACTCCCCGTATCGG	GTTATTTTTTGTTTCTATAC	GGTTCGACTCCCCGTATCGG	GTTATTTTTTGTTTCTATAC
BY4743_10-10	BY4743	WT	a/α	2n	II	692983	689400	SNP	1	A	G	2	G/A	52.2/47.8	71/65	136	G	52.2059	71	A	47.7941	65	TGGGTTTAATTCTGGCTCCA	CTAGAGAGCTAGCTTTACAA	TGGGTTTAATTCTGGCTCCA	CTAGAGAGCTAGCTTTACAA
BY4743_10-10	BY4743	WT	a/α	2n	II	763219	759629	SNP	1	T	C	2	T/C	53.6/46.4	74/64	138	T	53.6232	74	C	46.3768	64	AAATCTACTATCTGGTTCAG	CCATTGTGGTACTTCCATAG	AAATCTACTATCTGGTTCAG	CCATTGTGGTACTTCCATAG
BY4743_10-10	BY4743	WT	a/α	2n	III	55155	54379	SNP	1	A	G	1	G	98.5	65	66	G	98.4848	65				ACCCCTTATCTGTGATACTG	ACATACTAAAAAACGTGGAT	ACCCCTTATCTGTGATACTG	ACATACTAAAAAACGTGGAT
BY4743_10-10	BY4743	WT	a/α	2n	III	80842	80066	SNP	1	G	A	1	A	96.3	77	80	A	96.25	77				CAAAAAGGCAATCAGTGAAT	CACAGAAGATTAATGAGGAC	CAAAAAGGCAATCAGTGAAT	CACAGAAGATTAATGAGGAC
BY4743_10-10	BY4743	WT	a/α	2n	IV	786	786	SNP	1	A	G	1	G	66.2	51	77	G	66.2338	51				ATACGTTATACCACTTTTAC	CCGTATACTAACCACTCAAT	ATACGTTATACCACTTTTAC	CCGTATACTAACCACTCAAT
BY4743_10-10	BY4743	WT	a/α	2n	IV	244439	241126	SNP	1	G	A	2	G/A	52.7/47.3	69/62	131	G	52.6718	69	A	47.3282	62	AGAATGTAAAAGATAATGAA	AACTGCAAGAAATCGACAAT	AGAATGTAAAAGATAATGAA	AACTGCAAGAAATCGACAAT
BY4743_10-10	BY4743	WT	a/α	2n	IV	798879	783747	SNP	1	T	C	2	T/C	54.5/45.5	48/40	88	T	54.5455	48	C	45.4545	40	TTTTCAAGCCTTCTAAACAC	TATTGGTTGTGTCAATGTCA	TTTTCAAGCCTTCTAAACAC	TATTGGTTGTGTCAATGTCA
BY4743_10-10	BY4743	WT	a/α	2n	IV	847700	832569	SNP	1	C	A	2	C/A	55.0/45.0	55/45	100	C	55	55	A	45	45	TTTGGAAAAAGTGGTCTTAT	AAAGTGCACTTCATCATCGT	TTTGGAAAAAGTGGTCTTAT	AAAGTGCACTTCATCATCGT
BY4743_10-10	BY4743	WT	a/α	2n	IV	852874	837743	SNP	1	T	C	2	T/C	52.4/47.6	55/50	105	T	52.381	55	C	47.619	50	ATCATGTTCCAATAGAAACG	TTTTACCTCCTTTTTGTCGT	ATCATGTTCCAATAGAAACG	TTTTACCTCCTTTTTGTCGT
BY4743_10-10	BY4743	WT	a/α	2n	IV	878372	862424	SNP	1	A	G	1	G	56.2	41	73	G	56.1644	41				AAGGCTATAATATTAGGTAT	CAGAATATACTAGAAGTTCT	AAGGCTATAATATTAGGTAT	TAG-ATATACTAGAAGTTCT
BY4743_10-10	BY4743	WT	a/α	2n	IV	878373	862425	SNP	1	C	T	1	T	56.9	41	72	T	56.9444	41				AGGCTATAATATTAGGTATA	AGAATATACTAGAAGTTCTC	AGGCTATAATATTAGGTATG	AG-ATATACTAGAAGTTCTC
BY4743_10-10	BY4743	WT	a/α	2n	IV	1180590	1153098	SNP	1	T	G	2	T/G	52.8/47.2	65/58	123	T	52.8455	65	G	47.1545	58	ACACGATGTACAGGAAAAGG	TTTTTATAAAAATGGAACAG	ACACGATGTACAGGAAAAGG	TTTTTATAAAAATGGAACAG
BY4743_10-10	BY4743	WT	a/α	2n	IV	1217607	1186806	SNP	1	A	G	2	A/G	55.0/45.0	66/54	120	A	55	66	G	45	54	ATAGTTATCACCTTCTCAGT	TTGTTGCTCATCTATTACAA	ATAGTTATCACCTTCTCAGT	TTGTTGCTCATCTATTACAA
BY4743_10-10	BY4743	WT	a/α	2n	IV	1259431	1228321	SNP	1	A	G	2	G/A	51.7/48.3	60/56	116	G	51.7241	60	A	48.2759	56	TTGAGATTGTCTGTTCTTTG	CGGAAACAGCTCTGAAAATC	TTGAGATTGTCTGTTCTTTG	CGGAAACAGCTCTGAAAATC
BY4743_10-10	BY4743	WT	a/α	2n	IV	1322383	1291272	SNP	1	G	T	2	G/T	50.0/50.0	62/62	124	G	50	62	T	50	62	ATCTACACCATTGAGGCTCA	ATTATATGATAACTTCGTTT	ATCTACACCATTGAGGCTCA	ATTATATGATAACTTCGTTT
BY4743_10-10	BY4743	WT	a/α	2n	IV	1475871	1444760	SNP	1	T	C	2	T/C	52.5/47.5	64/58	122	T	52.459	64	C	47.541	58	GAGAGCCCCTGAATGTCTAA	TGCTCCTGGTATAACCTCAC	GAGAGCCCCTGAATGTCTAA	TGCTCCTGGTATAACCTCAC
BY4743_10-10	BY4743	WT	a/α	2n	V	56178	56155	SNP	1	T	C	2	C/T	50.0/50.0	81/81	162	C	50	81	T	50	81	CAATCTCAGCGCCACTCTTC	TGCTATTGAAGAGCTGCTAT	CAATCTCAGCGCCACTCTTC	TGCTATTGAAGAGCTGCTAT
BY4743_10-10	BY4743	WT	a/α	2n	V	442301	441180	SNP	1	T	A	2	T/A	50.8/49.2	62/60	122	T	50.8197	62	A	49.1803	60	GCAAGGTAGTTCTGGGTCCT	AGGGGCTCCACCTTCACCGC	GCAAGGTAGTTCTGGGTCCT	AGGGGCTCCACCTTCACCGC
BY4743_10-10	BY4743	WT	a/α	2n	VII	224184	224189	SNP	1	C	A	2	C/A	54.7/45.3	76/63	139	C	54.6763	76	A	45.3237	63	GTCGTAATGCCTCTGGATAG	ACGGGCTTCCTTAGCATTCA	GTCGTAATGCCTCTGGATAG	ACGGGCTTCCTTAGCATTCA
BY4743_10-10	BY4743	WT	a/α	2n	VII	320749	320754	SNP	1	T	A	2	A/T	53.8/46.2	63/54	117	A	53.8462	63	T	46.1538	54	TGATACGCCACATAATATTC	AATTTCTCTTCAACACATAA	TGATACGCCACATAATATTC	AATTTCTCTTCAACACATAA
BY4743_10-10	BY4743	WT	a/α	2n	VII	481893	481899	SNP	1	C	A	2	C/A	51.1/48.9	67/64	131	C	51.145	67	A	48.855	64	TCACCGGTAGCGGTAACAAC	ATGAAACCTTCACCTCTCTT	TCACCGGTAGCGGTAACAAC	ATGAAACCTTCACCTCTCTT
BY4743_10-10	BY4743	WT	a/α	2n	VII	674996	665628	SNP	1	G	A	2	G/A	51.9/48.1	68/63	131	G	51.9084	68	A	48.0916	63	TATCCAGTTTACGTATCTGA	TACGATGATGTCAAATCGGC	TATCCAGTTTACGTATCTGA	TACGATGATGTCAAATCGGC
BY4743_10-10	BY4743	WT	a/α	2n	VII	1005462	988490	SNP	1	C	T	2	C/T	53.0/47.0	70/62	132	C	53.0303	70	T	46.9697	62	GGATTTAGGAATGCCAGTCA	TTTAATTGGGGAGGCTGTTT	GGATTTAGGAATGCCAGTCA	TTTAATTGGGGAGGCTGTTT
BY4743_10-10	BY4743	WT	a/α	2n	VII	1052039	1035067	SNP	1	A	G	2	A/G	54.2/45.8	65/55	120	A	54.1667	65	G	45.8333	55	TTTGAAGAAAGCATCTTTGA	CCGACCAGTTCTCTTCACAA	TTTGAAGAAAGCATCTTTGA	CCGACCAGTTCTCTTCACAA
BY4743_10-10	BY4743	WT	a/α	2n	VIII	384990	380052	SNP	1	T	A	2	T/A	50.4/49.6	67/66	133	T	50.3759	67	A	49.6241	66	ATGCTTGATAGTTGTAGGAA	ATCTTAGAAGAAAGGGGATA	ATGCTTGATAGTTGTAGGAA	ATCTTAGAAGAAAGGGGATA
BY4743_10-10	BY4743	WT	a/α	2n	VIII	438327	433389	SNP	1	G	T	2	G/T	53.0/47.0	71/63	134	G	52.9851	71	T	47.0149	63	GTTAAAGGAGTAGCAACTCA	AGATTTCAAGAATGACGACA	GTTAAAGGAGTAGCAACTCA	AGATTTCAAGAATGACGACA
BY4743_10-10	BY4743	WT	a/α	2n	VIII	554378	543055	SNP	1	C	A	2	A/C	50.0/50.0	63/63	126	A	50	63	C	50	63	AATCAGTGCAATTAATAACT	CACAAGTAGCAAAAGCAATG	AATCAGTGCAATTAATAACT	CACAAGTACCAAAAGCAATG
BY4743_10-10	BY4743	WT	a/α	2n	VIII	554387	543064	SNP	1	G	C	2	G/C	50.4/49.6	63/62	125	G	50.4	63	C	49.6	62	AATTAATAACTCCACAAGTA	CAAAAGCAATGGCCGCCATT	AATTAATAACTACACAAGTA	CAAAAGCAATGGCCGCCATT
BY4743_10-10	BY4743	WT	a/α	2n	IX	65531	49266	SNP	1	T	A	2	T/A	51.7/48.3	76/71	147	T	51.7007	76	A	48.2993	71	CCTTATCCAGGTTCTCTATT	CTGATGAAAGTTTTTCAATC	CCTTATCCAGGTTCTCTATT	CTGATGAAAGTTTTTCAATC
BY4743_10-10	BY4743	WT	a/α	2n	X	54226	39916	SNP	1	A	G	2	G/A	51.8/48.2	71/66	137	G	51.8248	71	A	48.1752	66	CTAGAAGTATGTAAAGGTTG	TGATGCACCGTAATTGAGCA	CTAGAAGTATGTAAAGGTTG	TGATGCACCGTAATTGAGCA
BY4743_10-10	BY4743	WT	a/α	2n	X	111196	96886	SNP	1	A	G	2	A/G	54.0/46.0	68/58	126	A	53.9683	68	G	46.0317	58	CTTTCACACAATCAGCTATA	TTCATGCACTGCTTAAGCTA	CTTTCACACAATCAGCTATA	TTCATGCACTGCTTAAGCTA
BY4743_10-10	BY4743	WT	a/α	2n	X	576921	556905	SNP	1	T	C	2	T/C	53.3/46.7	56/49	105	T	53.3333	56	C	46.6667	49	ACGATGTTTAAATGTTATGT	CCATGTTGTGTTTTCCACCA	ACGATGTTTAAATGTTATGT	CCATGTTGTGTTTTCCACCA
BY4743_10-10	BY4743	WT	a/α	2n	XI	68803	68807	SNP	1	T	A	2	T/A	51.2/48.8	63/60	123	T	51.2195	63	A	48.7805	60	CCACGCGAGATGCATGTCCG	TCTTGAAATTTCTAGCCAAG	CCACGCGAGATGCATGTCCG	TCTTGAAATTTCTAGCCAAG
BY4743_10-10	BY4743	WT	a/α	2n	XI	133676	133680	SNP	1	C	T	2	T/C	51.8/48.2	71/66	137	T	51.8248	71	C	48.1752	66	TTACATATTTCCATGAAGGG	AATGTTTTTTGATATATACA	TTACATATTTCCATGAAGGG	AATGTTTTTTGATATATACA
BY4743_10-10	BY4743	WT	a/α	2n	XI	141110	141114	SNP	1	A	T	2	A/T	54.7/45.3	82/68	150	A	54.6667	82	T	45.3333	68	TTACAAAGGATAGAAAATTG	AACGTAATGGAATTACTCAT	TTACAAAGGATAGAAAATTG	AACGTAATGGAATTACTCAT
BY4743_10-10	BY4743	WT	a/α	2n	XI	386111	386115	SNP	1	A	T	2	A/T	51.8/48.2	73/68	141	A	51.773	73	T	48.227	68	GACTTGGACAAAAATTCAGA	CCTAATGGTTACATGTGTCC	GACTTGGACAAAAATTCAGA	CCTAATGGTTACATGTGTCC
BY4743_10-10	BY4743	WT	a/α	2n	XI	415864	415868	SNP	1	C	T	2	T/C	50.8/49.2	67/65	132	T	50.7576	67	C	49.2424	65	ATCAACGTACCTAATTGCAG	GTATCTTCCCAAGGTTTGAA	ATCAACGTACCTAATTGCAG	GTATCTTCCCAAGGTTTGAA
BY4743_10-10	BY4743	WT	a/α	2n	XI	504549	504547	SNP	1	T	C	2	T/C	53.5/46.5	69/60	129	T	53.4884	69	C	46.5116	60	TGGACTTCTTTTGGTGTGTT	TCGATTTTCCATTCTTGTCT	TGGACTTCTTTTGGTGTGTT	TCGATTTTCCATTCTTGTCT
BY4743_10-10	BY4743	WT	a/α	2n	XII	183867	177011	SNP	1	A	G	2	G/A	50.5/49.5	51/50	101	G	50.495	51	A	49.505	50	CACGGGTGGCGATTATGACG	TGAGGAAGAAGAATTTGTAA	CACGGGTGGCGATTATGACG	TGAGGAAGAAGAATTTGTAA
BY4743_10-10	BY4743	WT	a/α	2n	XII	199186	192329	SNP	1	A	T	2	T/A	52.7/47.3	58/52	110	T	52.7273	58	A	47.2727	52	TTTAACTTAGATTAAGTAGG	CGCATGATCTTGAGCTCTTT	TTTAACTTAGATTAAGTAGG	CGCATGATCTTGAGCTCTTT
BY4743_10-10	BY4743	WT	a/α	2n	XII	324687	313814	SNP	1	A	G	2	G/A	53.6/46.4	59/51	110	G	53.6364	59	A	46.3636	51	AATCTAAATCGGAGAGGCCC	TCAGCATCCTAGGCTCAGTT	AATCTAAATCGGAGAGGCCC	TCAGCATCCTAGGCTCAGTT
BY4743_10-10	BY4743	WT	a/α	2n	XII	418474	407601	SNP	1	A	C	1	C	66.2	43	65	C	66.1538	43				ACTAGAAGTCTCAAAGGCGC	CGTTGCTTATGCATGTGTTG	ACTAGAAGTCTCAAAGGCGC	CGTTGCTTATGCATGTGTTG
BY4743_10-10	BY4743	WT	a/α	2n	XII	746347	696209	SNP	1	A	G	1	G	97.6	124	127	G	97.6378	124				TGATGATTTCAGAACAGAGG	AGAAATACTTATGGACATAA	TGATGATTTCAGAACAGAGG	AGAAATACTTATGGACATAA
BY4743_10-10	BY4743	WT	a/α	2n	XII	794632	744495	SNP	1	A	C	1	C	99.1	110	111	C	99.0991	110				TAATATCACTTTGACCGATC	CTAATTTTCTTCAATATTGA	TAATATCACTTTGACCGATC	CTAATTTTCTTCAATATTGA
BY4743_10-10	BY4743	WT	a/α	2n	XII	810006	759869	SNP	1	G	A	2	G/A	52.0/48.0	65/60	125	G	52	65	A	48	60	ACGGTCAGACCATGAACACT	ATCAACAACCTTATCAGGGC	ACGGTCAGACCATGAACACT	ATCAACAACCTTATCAGGGC
BY4743_10-10	BY4743	WT	a/α	2n	XIII	522229	504618	SNP	1	A	T	2	T/A	53.7/46.3	73/63	136	T	53.6765	73	A	46.3235	63	TCTCTGTTCTTAACTTGGTC	GACAAAATTCGTCCGTTTGT	TCTCTGTTCTTAACTTGGTC	GACAAAATTCGTCCGTTTGT
BY4743_10-10	BY4743	WT	a/α	2n	XIII	607439	589828	SNP	1	T	A	1	A	55.5	71	128	A	55.4688	71				ATACCCAGCAGCCTCTATCA	TTTCCCAATTGATCAATCAG	ATACCCAGCAGCCTCTATCA	TTTCCCAATTGATCAATCAG
BY4743_10-10	BY4743	WT	a/α	2n	XIV	90664	84963	SNP	1	A	G	2	G/A	51.9/48.1	69/64	133	G	51.8797	69	A	48.1203	64	CTACGGCCCTCAAAAGGAAC	AGCACTGCTTGAATTAGGTC	CTACGGCCCTCAAAAGGAAC	AGCACTGCTTGAATTAGGTC
BY4743_10-10	BY4743	WT	a/α	2n	XIV	127998	121513	SNP	1	T	G	2	G/T	54.5/45.5	79/66	145	G	54.4828	79	T	45.5172	66	CGTATTCGTAACTTGTTCTT	ACCGTCGTCAGTCTTGTGCA	CGTATTCGTAACTTGTTCTT	ACCGTCGTCAGTCTTGTGCA
BY4743_10-10	BY4743	WT	a/α	2n	XIV	670805	663342	SNP	1	T	C	2	C/T	50.0/50.0	60/60	120	C	50	60	T	50	60	AATTTCTCCGAATCTTCATT	CAAATGTTAGTGAAAACCAA	AATTTCTCCGAATCTTCATT	CAAATGTTAGTGAAAACCAA
BY4743_10-10	BY4743	WT	a/α	2n	XIV	674178	666715	SNP	1	T	A	2	A/T	54.7/45.3	75/62	137	A	54.7445	75	T	45.2555	62	CCTTTACTTCACCCCTAGTC	CGATCTCAAACTTCTCTGTC	CCTTTACTTCACCCCTAGTC	CGATCTCAAACTTCTCTGTC
BY4743_10-10	BY4743	WT	a/α	2n	XIV	707531	700068	SNP	1	T	C	2	C/T	51.3/48.7	60/57	117	C	51.2821	60	T	48.7179	57	AGGCAGAGAAGAGAACCTGT	ATCAAATTCTAAGCAAAAAT	AGGCAGAGAAGAGAACCTGT	ATCAAATTCTAAGCAAAAAT
BY4743_10-10	BY4743	WT	a/α	2n	XV	656637	648829	SNP	1	A	T	2	A/T	53.3/46.7	56/49	105	A	53.3333	56	T	46.6667	49	TAGAAAACTTGCATATTGTA	TGGAAGACAGTCGAGAGCAA	TAGAAAACTTGCATATTGTA	TGGAAGACAGTCGAGAGCAA
BY4743_10-10	BY4743	WT	a/α	2n	XV	746690	737575	SNP	1	T	C	2	T/C	53.8/46.2	63/54	117	T	53.8462	63	C	46.1538	54	TTCTTTTTTACTATTGAAGG	TGGGCTGTGATTCATCGCGC	TTCTTTTTTACTATTGAAGG	TGGGCTGTGATTCATCGCGC
BY4743_10-10	BY4743	WT	a/α	2n	XV	785955	776840	SNP	1	A	G	2	A/G	51.7/48.3	62/58	120	A	51.6667	62	G	48.3333	58	AATGTTGAGTGGGGTGAAGA	CAAGTCCAGCAGGCGGAGGA	AATGTTGAGTGGGGTGAAGA	CAAGTCCAGCAGGCGGAGGA
BY4743_10-10	BY4743	WT	a/α	2n	XV	856343	847228	SNP	1	T	A	2	A/T	53.5/46.5	61/53	114	A	53.5088	61	T	46.4912	53	TCCCAATTCTTCCTCCTTCT	TGATCTATCTTCATCCATCC	TCCCAATTCTTCCTCCTTCT	TGATCTATCTTCATCCATCC
BY4743_10-10	BY4743	WT	a/α	2n	XVI	67563	54302	SNP	1	A	T	2	A/T	53.3/46.7	73/64	137	A	53.2847	73	T	46.7153	64	ATATTACGCTGCTCTTTTAA	ATTATTTCTGACGCGACCCG	ATATTACGCTGCTCTTTTAA	ATTATTTCTGACGCGACCCG
BY4743_10-10	BY4743	WT	a/α	2n	XVI	700968	683975	SNP	1	C	T	1	T	60	9	15	T	60	9				GGTGTCGGTGAATTCGAAGC	GGTATCTCTAAGGATGGTCA	GGTGTCGGTGAATTCGAAGC	GGTATCTCTAAGGATGGTCA
BY4743_10-10	BY4743	WT	a/α	2n	XVI	835880	814558	SNP	1	A	T	2	A/T	54.2/45.8	78/66	144	A	54.1667	78	T	45.8333	66	GACATTGCCTAGTTTGACAA	ATCTTTTTAACGCCACTATA	GACATTGCCTAGTTTGACAA	TCTTTTTAACGCCACTATAG
BY4743_10-10	BY4743	WT	a/α	2n	XVI	931577	905233	SNP	1	A	G	2	A/G	50.4/49.6	67/66	133	A	50.3759	67	G	49.6241	66	TGGTGACTGTAAACAATAAC	TCATGGCGGCCCCAGTAATG	TGGTGACTGTAAACAATAAC	TCATGGCGGCCCCAGTAATG
BY4743_10-10	BY4743	WT	a/α	2n	IV	773448	758317	DIP	1	A	-	2	-/A	52.7/47.3	48/43	91	-	52.7473	48	A	47.2527	43	TTGTCAGAAACACAACCTTT	AAAAAAACATACCTTACCTG	TTGTCAGAAACACAACCTTT	AAAAAAACATACCTTACCTG
BY4743_10-10	BY4743	WT	a/α	2n	IV	878376	862428	DIP	1	A	-	1	-	56.9	41	72	-	56.9444	41				CTATAATATTAGGTATACAG	ATATACTAGAAGTTCTCCTC	CTATAATATTAGGTATGTAG	ATATACTAGAAGTTCTCCTC
BY4743_10-10	BY4743	WT	a/α	2n	XIII	602459	584848	DIP	1	-	A	2	-/A	49.1/48.2	55/54	112	-	49.1071	55	A	48.2143	54	GGTGGAAAACCTGCTTTTTT	AATTAAAGTAGCAAAATAAA	GGTGGAAAACCTGCTTTTTT	ATTAAAGTAGCAAAATAAAG
BY4743_10-10	BY4743	WT	a/α	2n	Mito	36271	36272	DIP	1	-	T	1	T	77.9	620	796	T	77.8894	620				TATTAATAAAATCTATTAAC	TTTTTTTTTTAATGGATTAT	TATTAATAAAATCTATTAAC	TTTTTTTTTTAATGGATTAT
BY4743_10-10	BY4743	WT	a/α	2n	Mito	53157	53161	DIP	5	AATTA	-----	1	-----	72.4	572	790	-----	72.4051	572				TTAAAAATAGGTATTCACTT	AATTAAATTAAATTAAATTA	TTAAAAATAGGTATTCACTT	AATTAAATTAAATTAAATTA
BY4743_10-11	BY4743	WT	a/α	2n	I	51829	51650	SNP	1	G	A	1	A	98.7	74	75	A	98.6667	74				ATATATATATGTATATAACG	TTAACGTAAGAAGAGCTCTT	ATATATATATGTATATAACG	TTAACGTAAGAAGAGCTCTT
BY4743_10-11	BY4743	WT	a/α	2n	I	210900	208256	SNP	1	G	T	1	T	96.6	57	59	T	96.6102	57				TAATACTATGAGTAATTTTT	AGTACTGTGCTCATTTACTA	TAATACTATGAGTAATTTTT	AGTACTGTGCTCATTTACTA
BY4743_10-11	BY4743	WT	a/α	2n	II	365299	361315	SNP	1	G	A	2	A/G	54.2/45.8	78/66	144	A	54.1667	78	G	45.8333	66	CGCACTCATAATTAACTGTT	TTGCACGTATTCGTCAAGAT	CGCACTCATAATTAACTGTT	TTGCACGTATTCGTCAAGAT
BY4743_10-11	BY4743	WT	a/α	2n	II	569577	565592	SNP	1	C	A	2	C/A	51.6/48.4	80/75	155	C	51.6129	80	A	48.3871	75	TTACTTGCATGTGATGATGA	AGTATTCATCCGGTCGTAAG	TTACTTGCATGTGATGATGA	AGTATTCATCCGGTCGTAAG
BY4743_10-11	BY4743	WT	a/α	2n	II	745045	741061	SNP	1	C	G	2	G/C	52.4/47.6	75/68	143	G	52.4476	75	C	47.5524	68	TCTGCCCTCCGTGAAGTATG	TCCGCCAGAAGTTATCCTTT	TCTGCCCTCCGTGAAGTATG	TCCGCCAGAAGTTATCCTTT
BY4743_10-11	BY4743	WT	a/α	2n	III	132766	124860	SNP	1	A	G	2	G/A	54.8/45.2	74/61	135	G	54.8148	74	A	45.1852	61	ACATAGCACAACCGACGACA	CATTAGGAACAGTGATCCCT	ACATAGCACAACCGACGACA	CATTAGGAACAGTGATCCCT
BY4743_10-11	BY4743	WT	a/α	2n	IV	390325	387523	SNP	1	G	C	2	G/C	54.8/45.2	57/47	104	G	54.8077	57	C	45.1923	47	TATTATTCACTCTCTCCTGT	AAAATTGTTGAGACGGAGTA	TATTATTCACTCTCTCCTGT	AAAATTGTTGAGACGGAGTA
BY4743_10-11	BY4743	WT	a/α	2n	IV	427172	424371	SNP	1	G	T	1	T	57	45	79	T	56.962	45				TTGGAAAGCTCATCTCTCTT	AATGTATAATACTTTCTTCC	TTGGAAAGCTCATCTCTCTT	AATGTATAATACTTTCTTCC
BY4743_10-11	BY4743	WT	a/α	2n	IV	505117	502316	SNP	1	C	T	1	T	56.9	62	109	T	56.8807	62				GCACCTTAATAAGTTGGACA	TCATCAAAACGCATGAGTCC	GCACCTTAATAAGTTGGACA	TCATCAAAACGCATGAGTCC
BY4743_10-11	BY4743	WT	a/α	2n	IV	687826	673736	SNP	1	A	G	2	A/G	52.8/47.2	56/50	106	A	52.8302	56	G	47.1698	50	CCCTAGTGTTTCCAAAAGAA	AACAAAATGTTTGACACATA	CCCTAGTGTTTCCAAAAGAA	AACAAAATGTTTGACACATA
BY4743_10-11	BY4743	WT	a/α	2n	IV	1329356	1300295	SNP	1	T	C	1	C	67.9	125	184	C	67.9348	125				ACCAACCTTTGGAAGTTGTT	ACTCTAAATTGCCTGCCAAG	ACCAACCTTTGGAAGTTGTT	ACTCTAAATTGCCTGCCAAG
BY4743_10-11	BY4743	WT	a/α	2n	IV	1435969	1406908	SNP	1	A	T	1	T	62.3	127	204	T	62.2549	127				AAGTCTTTATTCCTTTTTAG	TATTCGTCACATCATGCTTT	AAGTCTTTATTCCTTTTTAG	TATTCGTCACATCATGCTTT
BY4743_10-11	BY4743	WT	a/α	2n	V	165884	164788	SNP	1	T	C	2	T/C	52.4/47.6	89/81	170	T	52.3529	89	C	47.6471	81	CAGTTTTACAGTAAGGTACG	TAAGAGTGTAATATGTCGAA	CAGTTTTACAGTAAGGTACG	TAAGAGTGTAATATGTCGAA
BY4743_10-11	BY4743	WT	a/α	2n	V	489575	483487	SNP	1	T	C	2	C/T	53.6/46.4	74/64	138	C	53.6232	74	T	46.3768	64	TTGAAGGTACAGCCGTTTCG	GATTGTTAACGGTTGAAAAA	TTGAAGGTACAGCCGTTTCG	GATTGTTAACGGTTGAAAAA
BY4743_10-11	BY4743	WT	a/α	2n	VI	26132	25757	SNP	1	C	A	2	C/A	52.9/47.1	81/72	153	C	52.9412	81	A	47.0588	72	TGCGCCTAGTCATTTCAACA	TTATAATTTGCTTCAGCTTA	TGCGCCTAGTCATTTCAACA	TTATAATTTGCTTCAGCTTA
BY4743_10-11	BY4743	WT	a/α	2n	VI	43643	43268	SNP	1	T	A	2	T/A	52.8/47.2	76/68	144	T	52.7778	76	A	47.2222	68	TAAAGCTATAAGTTGAATAG	TCAGTCAAAATTTTGACGGT	TAAAGCTATAAGTTGAATAG	TCAGTCAAAATTTTGACGGT
BY4743_10-11	BY4743	WT	a/α	2n	VII	77047	77052	SNP	1	T	A	2	T/A	54.6/45.4	65/54	119	T	54.6218	65	A	45.3782	54	TGAAGGATTTCAACATGAAC	TTGTCATGCTTTTCGTGCAA	TGAAGGATTTCAACATGAAC	TTGTCATGCTTTTCGTGCAA
BY4743_10-11	BY4743	WT	a/α	2n	VII	477154	477161	SNP	1	T	A	2	T/A	50.9/49.1	59/57	116	T	50.8621	59	A	49.1379	57	CGTAAGCAGCACTTTCAAGC	CTTTTTCATCTTCGGAAGTG	CGTAAGCAGCACTTTCAAGC	CTTTTTCATCTTCGGAAGTG
BY4743_10-11	BY4743	WT	a/α	2n	VII	723444	714639	SNP	1	A	G	2	A/G	50.8/49.2	65/63	128	A	50.7812	65	G	49.2188	63	CAAAAATACGAAGATTTGGA	CATGATCAACTAGATAGCAC	CAAAAATACGAAGATTTGGA	CATGATCAACTAGATAGCAC
BY4743_10-11	BY4743	WT	a/α	2n	VII	1022141	1005938	SNP	1	C	T	2	C/T	51.6/47.7	79/73	153	C	51.634	79	T	47.7124	73	GACAGATCGATAGGATACAC	ATTATCATCACGCTACGCGT	GACAGATCGATAGGATACAC	ATTATCATCACGCTACGCGT
BY4743_10-11	BY4743	WT	a/α	2n	VIII	159953	157606	SNP	1	A	G	2	A/G	50.3/49.7	76/75	151	A	50.3311	76	G	49.6689	75	TTGACCCCACAAGAGGTGGA	AGACGTGAGATTCCATTGGC	TTGACCCCACAAGAGGTGGA	AGACGTGAGATTCCATTGGC
BY4743_10-11	BY4743	WT	a/α	2n	VIII	272672	268495	SNP	1	G	A	2	A/G	50.4/49.6	60/59	119	A	50.4202	60	G	49.5798	59	TGCCAGTAAAACGGATATTT	ACACATTTCCGTTACAAACA	TGCCAGTAAAACGGATATTT	ACACATTTCCGTTACAAACA
BY4743_10-11	BY4743	WT	a/α	2n	VIII	346727	342550	SNP	1	C	A	2	C/A	52.4/47.6	65/59	124	C	52.4194	65	A	47.5806	59	ACAGAAAATGCAGGAACTCA	TAATTCTATTGCCTCGCATA	ACAGAAAATGCAGGAACTCA	TAATTCTATTGCCTCGCATA
BY4743_10-11	BY4743	WT	a/α	2n	VIII	347579	343402	SNP	1	T	C	1	C	55.1	75	136	C	55.1471	75				TCAATAAATCTAGCTCATCT	CAAATTCTACAAATGTACCT	TCAATAAATCTAGCTCATCT	CAAATTCTACAAATGTACCT
BY4743_10-11	BY4743	WT	a/α	2n	IX	166644	150549	SNP	1	G	A	2	G/A	52.5/47.5	63/57	120	G	52.5	63	A	47.5	57	CCCATAACAATACTATTAAC	GCAATAATAATAATGCCAAT	CCCATAACAATACTATTAAC	GCAATAATAATAATGCCAAT
BY4743_10-11	BY4743	WT	a/α	2n	IX	183717	167622	SNP	1	G	A	2	A/G	50.4/49.6	59/58	117	A	50.4274	59	G	49.5726	58	TATGCAGAGCGAAGGTCTTG	AAAAAGAAAAATATAGAACA	TATGCAGAGCGAAGGTCTTG	AAAAAGAAAAATATAGAACA
BY4743_10-11	BY4743	WT	a/α	2n	X	144085	130203	SNP	1	A	T	1	T	62.7	69	110	T	62.7273	69				CGCAAGTTCGCAATCGACCG	AACCAAGGGCGAATTGAATT	CGCAAGTTCGCAATCGACCG	AACCAAGGGCGAATTGAATT
BY4743_10-11	BY4743	WT	a/α	2n	X	189598	175716	SNP	1	C	A	1	A	65.8	75	114	A	65.7895	75				CGTTTGGAATGATCTCATCG	AAAATTTTTTTTCGCTAAAA	CGTTTGGAATGATCTCATCG	AAAATTTTTTTTCGCTAAAA
BY4743_10-11	BY4743	WT	a/α	2n	X	317657	303775	SNP	1	A	G	2	G/A	53.5/46.5	68/59	127	G	53.5433	68	A	46.4567	59	GCTGCTGAATGTAGCCCAGG	CATAGATTCCAACGATCTTT	GCTGCTGAATGTAGCCCAGG	CATAGATTCCAACGATCTTT
BY4743_10-11	BY4743	WT	a/α	2n	X	716757	697681	SNP	1	T	A	2	A/T	51.0/49.0	75/72	147	A	51.0204	75	T	48.9796	72	TCATATATGATAAACGGTCT	GATTCGGGTTCTTATAGCAA	TCATATATGATAAACGGTCT	GATTCGGGTTCTTATAGCAA
BY4743_10-11	BY4743	WT	a/α	2n	XI	2734	2735	SNP	1	C	A	2	C/A	51.9/48.1	69/64	133	C	51.8797	69	A	48.1203	64	ACTGTTAGCGTCTGCAAATT	GTGAATTCTCCGCGAATGCC	ACTGTTAGCGTCTGCAAATT	GTGAATTCTCCGCGAATGCC
BY4743_10-11	BY4743	WT	a/α	2n	XI	11269	11270	SNP	1	A	G	2	A/G	53.3/46.7	65/57	122	A	53.2787	65	G	46.7213	57	CTTTGGATAAAAAAGACTTT	TTACAACTGTAGCAAAAAAT	CTTTGGATAAAAAAGACTTT	TTACAACTGTAGCAAAAAAT
BY4743_10-11	BY4743	WT	a/α	2n	XI	219953	219957	SNP	1	T	C	2	T/C	53.8/46.2	84/72	156	T	53.8462	84	C	46.1538	72	GGGAGAGGTCTCCGGTTCGA	TCCGGACTCGTCCAATCTTT	GGGAGAGGTCTCCGGTTCGA	TCCGGACTCGTCCAATCTTT
BY4743_10-11	BY4743	WT	a/α	2n	XI	244335	244339	SNP	1	T	C	2	T/C	50.9/49.1	57/55	112	T	50.8929	57	C	49.1071	55	GTCGTAAGGGCCCTTCATGA	CTGAGCTAACTCCATCTCTA	GTCGTAAGGGCCCTTCATGA	CTGAGCTAACTCCATCTCTA
BY4743_10-11	BY4743	WT	a/α	2n	XII	123228	116436	SNP	1	G	T	2	G/T	51.6/48.4	66/62	128	G	51.5625	66	T	48.4375	62	GAGAATGAGGATGAGAATGA	AGTGAGATTTATGGTTGTTG	GAGAATGAGGATGAGAATGA	AGTGAGATTTATGGTTGTTG
BY4743_10-11	BY4743	WT	a/α	2n	XII	369498	359006	SNP	1	G	C	2	G/C	51.2/48.8	44/42	86	G	51.1628	44	C	48.8372	42	CAGTAAAATAGGAACTCCGC	AGGTTCAGGAACCTGAAACA	CAGTAAAATAGGAACTCCGC	AGGTTCAGGAACCTGAAACA
BY4743_10-11	BY4743	WT	a/α	2n	XII	505624	462168	SNP	1	A	T	1	T	100	78	78	T	100	78				AGGTATTATTCAAAGGGGTA	ACTTGATAATACTCCAGATG	AGGTATTATTCAAAGGGGTA	ACTTGATAATACTCCAGATG
BY4743_10-11	BY4743	WT	a/α	2n	XII	530458	487002	SNP	1	C	G	1	G	98	100	102	G	98.0392	100				GTTGGAAGACAATTAATTAT	GCATTATGTTTGCTGAATAT	GTTGGAAGACAATTAATTAT	GCATTATGTTTGCTGAATAT
BY4743_10-11	BY4743	WT	a/α	2n	XII	827903	780391	SNP	1	C	A	1	A	97.2	106	109	A	97.2477	106				CTGTTGCGTTATCTTTTCGA	ACTTTCAGAGCAAGAGAAAC	CTGTTGCGTTATCTTTTCGA	ACTTTCAGAGCAAGAGAAAC
BY4743_10-11	BY4743	WT	a/α	2n	XIII	152880	148617	SNP	1	C	G	2	C/G	53.6/46.4	82/71	153	C	53.5948	82	G	46.4052	71	GACTAGTGGTAGCACTACAA	TGGTACTATAAAGAAGAGAA	GACTAGTGGTAGCACTACAA	TGGTACTATAAAGAAGAGAA
BY4743_10-11	BY4743	WT	a/α	2n	XIII	153602	149339	SNP	1	C	A	2	C/A	52.0/48.0	65/60	125	C	52	65	A	48	60	TTCCATAGGCGTTCTATCAT	TGCAGAACCTACATCTACTG	TTCCATAGGCGTTCTATCAT	TGCAGAACCTACATCTACTG
BY4743_10-11	BY4743	WT	a/α	2n	XIII	272573	259521	SNP	1	T	C	2	C/T	52.6/47.4	70/63	133	C	52.6316	70	T	47.3684	63	GACGCGAGAAACTTTACACG	TGTTTGGATGAAAACAACGG	GACGCGAGAAACTTTACACG	TGTTTGGATGAAAACAACGG
BY4743_10-11	BY4743	WT	a/α	2n	XIII	508016	491072	SNP	1	A	G	2	A/G	53.9/46.1	69/59	128	A	53.9062	69	G	46.0938	59	ATTGAGTATATTTAATAGCA	TGGTGGCAACCGTTAAATCA	ATTGAGTATATTTAATAGCA	TGGTGGCAACCGTTAAATCA
BY4743_10-11	BY4743	WT	a/α	2n	XIII	610716	593772	SNP	1	T	C	1	C	61.1	88	144	C	61.1111	88				CGTTGAGTCTCATTGGAGGT	TGCATCATATGTTTAGGTTT	CGTTGAGTCTCATTGGAGGT	TGCATCATATGTTTAGGTTT
BY4743_10-11	BY4743	WT	a/α	2n	XIII	813908	796964	SNP	1	T	C	2	T/C	51.6/48.4	65/61	126	T	51.5873	65	C	48.4127	61	CAAAACTTCAGACTTCCGTT	ATCCCTTTGACTAGCGATCG	CAAAACTTCAGACTTCCGTT	ATCCCTTTGACTAGCGATCG
BY4743_10-11	BY4743	WT	a/α	2n	XIII	880460	863516	SNP	1	C	A	2	C/A	51.5/48.5	86/81	167	C	51.497	86	A	48.503	81	AACTTCACGCAGACATCTTT	CCTCCATTATAAATACTACA	AACTTCACGCAGACATCTTT	CCTCCATTATAAATACTACA
BY4743_10-11	BY4743	WT	a/α	2n	XIII	893325	876381	SNP	1	G	C	2	C/G	51.2/48.8	85/81	166	C	51.2048	85	G	48.7952	81	TTTCCATGTTTGGTAATAAA	CCCAAGATTTTATTTCTCTT	TTTCCATGTTTGGTAATAAA	CCCAAGATTTTATTTCTCTT
BY4743_10-11	BY4743	WT	a/α	2n	XIV	6644	1281	SNP	1	C	A	2	A/C	53.9/46.1	132/113	245	A	53.8776	132	C	46.1224	113	CCCACACCCACACACCACAC	CCACACACCCACACCACACC	CCACACACCACAC-CCACAC	CACACACCCACACCACACCC
BY4743_10-11	BY4743	WT	a/α	2n	XIV	128541	122485	SNP	1	C	G	2	G/C	54.8/45.2	69/57	126	G	54.7619	69	C	45.2381	57	AGAAGTGCTAGAAGAAGTTG	TGAATCACTCAATATTGTGG	AGAAGTGCTAGAAGAAGTTG	TGAATCACTCAATATTGTGG
BY4743_10-11	BY4743	WT	a/α	2n	XIV	211795	205739	SNP	1	T	A	2	T/A	50.7/49.3	77/75	152	T	50.6579	77	A	49.3421	75	TTATTAGTACAGGTTTTGAC	TTGCAAATAAACAACAGGAA	TTATTAGTACAGGTTTTGAC	TTGCAAATAAACAACAGGAA
BY4743_10-11	BY4743	WT	a/α	2n	XIV	222135	216079	SNP	1	A	G	2	A/G	50.4/49.6	69/68	137	A	50.365	69	G	49.635	68	TTAAAAAATAAGAGTAATTC	TCAGTTGTGACACCTGTGAC	TTAAAAAATAAGAGTAATTC	TCAGTTGTGACACCTGTGAC
BY4743_10-11	BY4743	WT	a/α	2n	XIV	274150	268094	SNP	1	T	C	2	C/T	50.7/49.3	71/69	140	C	50.7143	71	T	49.2857	69	TCGGCATCTGCGATATTCTT	TGGACCAGTTAGTGATGACG	TCGGCATCTGCGATATTCTT	TGGACCAGTTAGTGATGACG
BY4743_10-11	BY4743	WT	a/α	2n	XIV	417571	411512	SNP	1	T	A	1	A	58.6	65	111	A	58.5586	65				CCTCTCTCACTATCTCGATC	CGTATAGCTTTCTTTTTTGC	CCTCTCTCACTATCTCGATC	CGTATAGCTTTCTTTTTTGC
BY4743_10-11	BY4743	WT	a/α	2n	XIV	421547	415488	SNP	1	G	T	2	G/T	52.1/47.9	63/58	121	G	52.0661	63	T	47.9339	58	GGAGGCGGAGGAAGCACATT	AGCTTACTTTTATCGGGTGA	GGAGGCGGAGGAAGCACATT	AGCTTACTTTTATCGGGTGA
BY4743_10-11	BY4743	WT	a/α	2n	XIV	427010	420951	SNP	1	T	C	2	C/T	52.5/47.5	52/47	99	C	52.5253	52	T	47.4747	47	CTCCCATGCGCCCGTGCTTA	ATATATATAAATATACATAC	CTCCCATGCGCCCGTGCTTA	ATATATATAAATATACATAC
BY4743_10-11	BY4743	WT	a/α	2n	XIV	440913	434855	SNP	1	C	T	2	C/T	51.8/48.2	59/55	114	C	51.7544	59	T	48.2456	55	CCAGCTTTGTTTCGTCTTTG	TGTCATGTTCCGTTTAATTT	CCAGCTTTGTTTCGTCTTTG	TGTCATGTTCCGTTTAATTT
BY4743_10-11	BY4743	WT	a/α	2n	XIV	445523	439465	SNP	1	T	A	2	T/A	54.4/45.6	80/67	147	T	54.4218	80	A	45.5782	67	TGGAGTTAATGAAAATTTTC	CATCCACTGTGGTAATGATT	TGGAGTTAATGAAAATTTTC	CATCCACTGTGGTAATGATT
BY4743_10-11	BY4743	WT	a/α	2n	XIV	478628	472570	SNP	1	C	T	2	T/C	51.8/48.2	71/66	137	T	51.8248	71	C	48.1752	66	CTTTGCGTCTTCGTACTTGA	GGTCAATTCCTCGTTCTTTC	CTTTGCGTCTTCGTACTTGA	GGTCAATTCCTCGTTCTTTC
BY4743_10-11	BY4743	WT	a/α	2n	XIV	483861	477803	SNP	1	A	T	2	A/T	53.8/46.2	64/55	119	A	53.7815	64	T	46.2185	55	ATAAAGCCAAAGCAGGCAGC	GTAAAGCAGCCACCATTACA	ATAAAGCCAAAGCAGGCAGC	GTAAAGCAGCCACCATTACA
BY4743_10-11	BY4743	WT	a/α	2n	XIV	515604	509546	SNP	1	T	A	2	A/T	50.4/49.6	60/59	119	A	50.4202	60	T	49.5798	59	AATATGATAAAGATATATCT	GGCAGATGTACTGATGATTA	AATATGATAAAGATATATCT	GGCAGATGTACTGATGATTA
BY4743_10-11	BY4743	WT	a/α	2n	XIV	709538	702900	SNP	1	C	A	2	C/A	50.8/49.2	62/60	122	C	50.8197	62	A	49.1803	60	CAAAGATACGCTGAATGGCT	ACCCAGTAGAGGTAGTTCCA	CAAAGATACGCTGAATGGCT	ACCCAGTAGAGGTAGTTCCA
BY4743_10-11	BY4743	WT	a/α	2n	XV	336296	333209	SNP	1	C	G	2	C/G	53.9/46.1	69/59	128	C	53.9062	69	G	46.0938	59	AAGACCGAATGGAAGAATCA	CCGTCTTTTTGCATCAAACG	AAGACCGAATGGAAGAATCA	CCGTCTTTTTGCATCAAACG
BY4743_10-11	BY4743	WT	a/α	2n	XV	593644	590318	SNP	1	A	G	2	A/G	54.9/45.1	67/55	122	A	54.918	67	G	45.082	55	GAAGCTGTTCAGCAAACTAC	AAAACTGACCTTGGTCAATC	GAAGCTGTTCAGCAAACTAC	AAAACTGACCTTGGTCAATC
BY4743_10-11	BY4743	WT	a/α	2n	XV	758040	749605	SNP	1	T	C	2	C/T	53.3/46.7	56/49	105	C	53.3333	56	T	46.6667	49	CATTCAATTGCTTGTGCATT	CTAACATGAAATAGTGGTAC	CATTCAATTGCTTGTGCATT	CTAACATGAAATAGTGGTAC
BY4743_10-11	BY4743	WT	a/α	2n	XV	815441	807006	SNP	1	A	G	2	A/G	52.6/47.4	61/55	116	A	52.5862	61	G	47.4138	55	CTGGAAAATTGTATTATTGG	CCTATGGCAAAAATCGGTTC	CTGGAAAATTGTATTATTGG	CCTATGGCAAAAATCGGTTC
BY4743_10-11	BY4743	WT	a/α	2n	XV	927307	918872	SNP	1	T	C	2	T/C	52.2/47.0	60/54	115	T	52.1739	60	C	46.9565	54	GAAAGTAGGTTACCTGCTGG	TCCGACGAATCTTGGACCCA	GAAAGTAGGTTACCTGCTGG	TCCGACGAATCTTGGACCCA
BY4743_10-11	BY4743	WT	a/α	2n	XVI	39862	31977	SNP	1	A	T	2	T/A	53.7/46.3	66/57	123	T	53.6585	66	A	46.3415	57	GCTTCAAATCGACCACCGTG	TGGACATTCTGGAGAAGAAT	GCTTCAAATCGACCACCGTG	TGGACATTCTGGAGAAGAAT
BY4743_10-11	BY4743	WT	a/α	2n	XVI	130676	118357	SNP	1	T	G	2	G/T	51.7/48.3	60/56	116	G	51.7241	60	T	48.2759	56	GTTTGCAGATGGGAAAGCTG	GTTAAGATCAAGCATACGTG	GTTTGCAGATGGGAAAGCTG	GTTAAGATCAAGCATACGTG
BY4743_10-11	BY4743	WT	a/α	2n	XVI	190770	178442	SNP	1	T	A	2	T/A	50.8/49.2	65/63	128	T	50.7812	65	A	49.2188	63	AGGTTTGTTTGCGGTATCGG	GCTGCAATAAATATTTGCAT	AGGTTTGTTTGCGGTATCGG	GCTGCAATAAATATTTGCAT
BY4743_10-11	BY4743	WT	a/α	2n	IV	629578	619076	DIP	1	-	A	2	-/A	53.5/46.5	53/46	99	-	53.5354	53	A	46.4646	46	ATATCATTTAAAAAATTACC	AAAGTACAATAAGCAGTTTT	ATATCATTTAAAAAATTACC	AAGTACAATAAGCAGTTTTT
BY4743_10-11	BY4743	WT	a/α	2n	VIII	9	9	DIP	1	-	C	2	-/C	53.8/46.2	57/49	106	-	53.7736	57	C	46.2264	49	CCCACACA	CACCACACCCACACACCACA	CCCACACA	ACACACACCCACACCACCAC
BY4743_10-11	BY4743	WT	a/α	2n	Mito	62726	62730	DIP	1	-	A	1	A	84	541	644	A	84.0062	541				ATATTTTATATTTAATAAAT	AAAAAAAATATTAATAAATA	ATATTTTATATTTAATAAAT	AAAAAAAATATTAATAAATA
BY4743_10-12	BY4743	WT	a/α	2n	II	385665	381320	SNP	1	A	G	2	G/A	53.0/47.0	53/47	100	G	53	53	A	47	47	AGAGTAACACACATGACTTA	TTTGTTCTTGCGATGGTTTA	AGAGTAACACACATGACTTA	TTTGTTCTTGCGATGGTTTA
BY4743_10-12	BY4743	WT	a/α	2n	II	492028	487681	SNP	1	G	T	2	G/T	50.0/50.0	39/39	78	G	50	39	T	50	39	CGTTCCGTTTGGTAAGCAAG	TATTCAGCGGTGGTCAAGGC	CGTTCCGTTTGGTAAGCAAG	TATTCAGCGGTGGTCAAGGC
BY4743_10-12	BY4743	WT	a/α	2n	II	670440	666093	SNP	1	A	G	2	A/G	50.4/49.6	59/58	117	A	50.4274	59	G	49.5726	58	AAATACATCAGAAGGGATCC	TACCAACACTTACCAAGAAC	AAATACATCAGAAGGGATCC	TACCAACACTTACCAAGAAC
BY4743_10-12	BY4743	WT	a/α	2n	II	715238	710891	SNP	1	C	T	2	C/T	54.6/45.4	71/59	130	C	54.6154	71	T	45.3846	59	CGTATCTGCTTGTGAATTTA	ATATACTCTCTTAGGGTCGA	CGTATCTGCTTGTGAATTTA	ATATACTCTCTTAGGGTCGA
BY4743_10-12	BY4743	WT	a/α	2n	III	1043	1043	SNP	1	A	T	2	A/T	50.0/50.0	62/62	124	A	50	62	T	50	62	AACCACAAAATCACCACTAA	ATCACCTAAACATAAAAATA	AACCACAAAATCACCACTAA	ATCACCTAAACATAAAAATA
BY4743_10-12	BY4743	WT	a/α	2n	III	14286	13480	SNP	1	G	T	2	G/T	50.7/49.3	68/66	134	G	50.7463	68	T	49.2537	66	GTCCAAAGATCGTAAGTTTG	TCTAATGTTGTTTTAGCAAA	GTCCAAAGATCGTAAGTTTG	TCTAATGTTGTTTTAGCAAA
BY4743_10-12	BY4743	WT	a/α	2n	III	298983	287557	SNP	1	A	G	2	G/A	52.7/47.3	69/62	131	G	52.6718	69	A	47.3282	62	GAAGATAAATGTGGCACCAA	CGGCAACGCGGAAGACCGTA	GAAGATAAATGTGGCACCAA	CGGCAACGCGGAAGACCGTA
BY4743_10-12	BY4743	WT	a/α	2n	IV	9584	7865	SNP	1	T	A	1	A	95	38	40	A	95	38				CCATTGGCGCCTTCAATATG	ACTTACCAATACCACCGCTT	CCATTGGCGCCTTCAATATG	ACTTACCAATACCACCGCTT
BY4743_10-12	BY4743	WT	a/α	2n	IV	766804	752036	SNP	1	T	C	1	C	95.5	84	88	C	95.4545	84				TCCCTTCGACTTGTCCTTTG	AGCCTGAGGACGGGCTTTTT	TCCCTTCGACTTGTCCTTTG	AGCCTGAGGACGGGCTTTTT
BY4743_10-12	BY4743	WT	a/α	2n	IV	1317257	1285856	SNP	1	T	A	1	A	97.9	92	94	A	97.8723	92				ATGCCTTTCATGGTGTGGTT	GTCGTTTCTTTCATTTTCTG	ATGCCTTTCATGGTGTGGTT	GTCGTTTCTTTCATTTTCTG
BY4743_10-12	BY4743	WT	a/α	2n	IV	1317768	1286367	SNP	1	T	A	1	A	99	104	105	A	99.0476	104				TCCTGAGTAGAAGGACTGTT	CCCATGGCGGCTGCAACAAC	TCCTGAGTAGAAGGACTGTT	CCCATGGCGGCTGCAACAAC
BY4743_10-12	BY4743	WT	a/α	2n	IV	1452131	1420730	SNP	1	C	G	1	G	99	96	97	G	98.9691	96				GTTGTGTTTATTAACAACAA	GAGCGATGATTTTTCTTGGC	GTTGTGTTTATTAACAACAA	GAGCGATGATTTTTCTTGGC
BY4743_10-12	BY4743	WT	a/α	2n	V	157100	155977	SNP	1	T	C	2	C/T	52.0/48.0	65/60	125	C	52	65	T	48	60	GTGAGGACGAGCAAAATGAT	ATAATGCGGCTACCGTGGAG	GTGAGGACGAGCAAAATGAT	ATAATGCGGCTACCGTGGAG
BY4743_10-12	BY4743	WT	a/α	2n	V	442202	441078	SNP	1	G	T	2	G/T	51.7/48.3	60/56	116	G	51.7241	60	T	48.2759	56	GGGAGAGTCCGTTCTGAAGT	TCCCGGCTATAATAAATCGA	GGGAGAGTCCGTTCTGAAGT	TCCCGGCTATAATAAATCGA
BY4743_10-12	BY4743	WT	a/α	2n	V	442250	441126	SNP	1	G	C	2	G/C	54.5/45.5	66/55	121	G	54.5455	66	C	45.4545	55	GGGCAGCCCGTTGGCAGGAG	CGTGAGGAATCCGTCTCTCT	GGGCAGCCCGTTGGCAGGAG	CGTGAGGAATCCGTCTCTCT
BY4743_10-12	BY4743	WT	a/α	2n	V	470105	464167	SNP	1	A	G	2	A/G	52.4/47.6	76/69	145	A	52.4138	76	G	47.5862	69	GATTAAAAGAACTTGCGGCA	TTTATCAATAAAAGTCTGCT	GATTAAAAGAACTTGCGGCA	TTTATCAATAAAAGTCTGCT
BY4743_10-12	BY4743	WT	a/α	2n	VI	269834	264549	SNP	1	A	G	2	G/A	51.9/47.4	70/64	135	G	51.8519	70	A	47.4074	64	ATATTAGTCTACATAAAAAT	AGTGGTGGATATCTACATAA	ATATTAGTCTACATAAAAAT	AGTGGTGGATATCTACATAA
BY4743_10-12	BY4743	WT	a/α	2n	VII	1767	1771	SNP	1	A	G	2	A/G	51.1/48.9	71/68	139	A	51.0791	71	G	48.9209	68	TATGATGGCATTACGTATAA	CGGAGAGTGATGACGTTTTA	TATGATGGCATTACGTATAA	CGGAGAGTGATGACGTTTTA
BY4743_10-12	BY4743	WT	a/α	2n	VII	989861	972669	SNP	1	G	T	2	T/G	50.4/49.6	64/63	127	T	50.3937	64	G	49.6063	63	CTCGCGCGCTTCCGACTTTT	AAAGAAGGAGCAATAAAGTT	CTCGCGCGCTTCCGACTTTT	AAAGAAGGAGCAATAAAGTT
BY4743_10-12	BY4743	WT	a/α	2n	VII	1084217	1067025	SNP	1	T	C	2	T/C	52.8/47.2	67/60	127	T	52.7559	67	C	47.2441	60	GGCAATTGGAGGGTAACAGG	GGTGGATGTGGGTGAGTGGT	GGCAATTGGAGGGTAACAGG	GGTGGATGTGGGTGAGTGGT
BY4743_10-12	BY4743	WT	a/α	2n	VIII	58622	58626	SNP	1	A	G	2	A/G	51.1/48.9	70/67	137	A	51.0949	70	G	48.9051	67	ATGATGGTTTATCCCATGTC	CCACCTCCGCCTTCTGGGTT	ATGATGGTTTATCCCATGTC	CCACCTCCGCCTTCTGGGTT
BY4743_10-12	BY4743	WT	a/α	2n	VIII	212259	209492	SNP	1	C	A	2	A/C	50.0/50.0	60/60	120	A	50	60	C	50	60	AATACATTTTAGGATTAATA	ATATGCTTTTTTTTTATTCG	AATACATTTTAGGATTAATA	ATATGCTTTTTTTTTATTCG
BY4743_10-12	BY4743	WT	a/α	2n	VIII	427248	422459	SNP	1	T	A	1	A	55.1	70	127	A	55.1181	70				CATATATTGGAGACCAAATG	TTTCTTCAATATCAATCACA	CATATATTGGAGACCAAATG	TTTCTTCAATATCAATCACA
BY4743_10-12	BY4743	WT	a/α	2n	X	82812	68292	SNP	1	A	G	1	G	96.7	58	60	G	96.6667	58				GGGTTATTGATAACCCTTAC	TCATTGAATGACTTTAATCT	GGGTTATTGATAACCCTTAC	TCATTGAATGACTTTAATCT
BY4743_10-12	BY4743	WT	a/α	2n	X	90710	76190	SNP	1	C	A	1	A	98.5	67	68	A	98.5294	67				TTTTTAGTGTAGCTTGTACT	TTTCCCTGCATTATTTTTGT	TTTTTAGTGTAGCTTGTACT	TTTCCCTGCATTATTTTTGT
BY4743_10-12	BY4743	WT	a/α	2n	X	100580	86060	SNP	1	A	C	1	C	100	59	59	C	100	59				TAGGCAAGACGGTTCCAATC	GAAGAACTTCTGCTGTTGTT	TAGGCAAGACGGTTCCAATC	GAAGAACTTCTGCTGTTGTT
BY4743_10-12	BY4743	WT	a/α	2n	X	112899	98379	SNP	1	C	A	1	A	94.6	53	56	A	94.6429	53				AATTCTCCCCACTTACCAGC	ATGAAAATACTGATTGCCCC	AATTCTCCCCACTTACCAGC	ATGAAAATACTGATTGCCCC
BY4743_10-12	BY4743	WT	a/α	2n	X	113617	99097	SNP	1	C	T	1	T	95.5	64	67	T	95.5224	64				ACTTTCATTCACTTGGAAGC	AAACCAGTTTATAAGTACTT	ACTTTCATTCACTTGGAAGC	AAACCAGTTTATAAGTACTT
BY4743_10-12	BY4743	WT	a/α	2n	X	143499	128979	SNP	1	T	C	1	C	98.3	59	60	C	98.3333	59				TTTCATCACTTGCGAGAGGG	CGACACAGCAGCAGCAAAGG	TTTCATCACTTGCGAGAGGG	CGACACAGCAGCAGCAAAGG
BY4743_10-12	BY4743	WT	a/α	2n	X	393823	379303	SNP	1	G	A	2	G/A	51.7/48.3	15/14	29	G	51.7241	15	A	48.2759	14	AAGAAAAGCTTAAAAAAATT	GAAAAAAAAAAAAAAAAAAA	AAGAAAAGCTTAAAAAAATT	AAAAAAAAAAAAAAAAAAAT
BY4743_10-12	BY4743	WT	a/α	2n	XI	84256	84260	SNP	1	C	T	1	T	55	71	129	T	55.0388	71				CAGACTTAAGATCTGTTGGA	GGTTGTCCGCGCGAGTTCGA	CAGACTTAAGATCTGTTGGA	GGTTGTCCGCGCGAGTTCGA
BY4743_10-12	BY4743	WT	a/α	2n	XI	241255	241259	SNP	1	A	G	2	G/A	54.2/45.8	64/54	118	G	54.2373	64	A	45.7627	54	TCTACTAAATTTCCTTCGGC	TCAACAGAATCGATATTCTC	TCTACTAAATTTCCTTCGGC	TCAACAGAATCGATATTCTC
BY4743_10-12	BY4743	WT	a/α	2n	XI	536294	536294	SNP	1	G	C	2	G/C	52.3/47.7	57/52	109	G	52.2936	57	C	47.7064	52	TAGTTTATCACCAGTCAAAT	GCATGTCATGAACATTTTGA	TAGTTTATCACCAGTCAAAT	GCATGTCATGAACATTTTGA
BY4743_10-12	BY4743	WT	a/α	2n	XI	665974	665974	SNP	1	T	G	2	G/T	53.1/46.9	77/68	145	G	53.1034	77	T	46.8966	68	GTGATTTTGGTGGTGATTTT	TGGTTATATTAACATAAGTG	GTGATTTTGGTGGTGATTTT	TGGTTATATTAACATAAGTG
BY4743_10-12	BY4743	WT	a/α	2n	XII	151014	144222	SNP	1	T	C	2	T/C	52.2/47.8	48/44	92	T	52.1739	48	C	47.8261	44	TAACCTCGTACTACAAGTTT	CTCCTTATAAAAAGCTGACT	TAACCTCGTACTACAAGTTT	CTCCTTATAAAAAGCTGACT
BY4743_10-12	BY4743	WT	a/α	2n	XII	210509	203716	SNP	1	C	G	2	G/C	54.8/45.2	57/47	104	G	54.8077	57	C	45.1923	47	CACTTGACAATAAATAGGTT	CATTAAAAATGGATGTCGGC	CACTTGACAATAAATAGGTT	CATTAAAAATGGATGTCGGC
BY4743_10-12	BY4743	WT	a/α	2n	XII	431612	421021	SNP	1	T	C	1	C	98.7	74	75	C	98.6667	74				GGATCACGAGAAAACCAAAT	GAATAAGGATGTGTCCATAT	GGATCACGAGAAAACCAAAT	GAATAAGGATGTGTCCATAT
BY4743_10-12	BY4743	WT	a/α	2n	XII	837966	787825	SNP	1	A	T	2	T/A	51.7/48.3	60/56	116	T	51.7241	60	A	48.2759	56	TATGTCGGATGAAAAAAAAA	AATCTTAAATGTGAAATTGG	TATGTCGGATGAAAAAAAAA	AATCTTAAATGTGAAATTGG
BY4743_10-12	BY4743	WT	a/α	2n	XII	1034542	981955	SNP	1	C	A	1	A	99.3	137	138	A	99.2754	137				GAAAAAATTAGAGGACACAA	TCGTGCGGTTTTAGTTAGGA	GAAAAAATTAGAGGACACAA	TCGTGCGGTTTTAGTTAGGA
BY4743_10-12	BY4743	WT	a/α	2n	XIII	647887	629873	SNP	1	A	G	2	A/G	55.0/45.0	66/54	120	A	55	66	G	45	54	AAATTTAAAAGAAGATTCAA	AAAAATTAACAACAATGAAA	AAATTTAAAAGAAGATTCAA	AAAAATTAACAACAATGAAA
BY4743_10-12	BY4743	WT	a/α	2n	XIII	900996	882982	SNP	1	A	G	1	G	59.2	74	125	G	59.2	74				TTGAAGTCGTACCTCCTCGA	AAGAAATTCCGCCGCCATAA	TTGAAGTCGTACCTCCTCGA	AAGAAATTCCGCCGCCATAA
BY4743_10-12	BY4743	WT	a/α	2n	XIV	7244	1521	SNP	1	A	G	1	G	100	62	62	G	100	62				TTATCCACATTTTAATATCT	TATCTCATTCGGCGGCCCCA	TTATCCACATTTTAATATCT	TATCTCATTCGGCGGCCCCA
BY4743_10-12	BY4743	WT	a/α	2n	XIV	289329	282736	SNP	1	T	C	2	T/C	51.6/48.4	63/59	122	T	51.6393	63	C	48.3607	59	CCGCTTCTGTCCTTTATTTG	TTCATAGAAGCTATTAAGCA	CCGCTTCTGTCCTTTATTTG	TTCATAGAAGCTATTAAGCA
BY4743_10-12	BY4743	WT	a/α	2n	XIV	559891	553296	SNP	1	C	G	2	C/G	54.8/45.2	57/47	104	C	54.8077	57	G	45.1923	47	GATATCTTGGCCGCCAATGC	AAATGGGCCTCCCAGATGAA	GATATCTTGGCCGCCAATGC	AAATGGGCCTCCCAGATGAA
BY4743_10-12	BY4743	WT	a/α	2n	XIV	631935	624524	SNP	1	T	C	2	C/T	51.7/48.3	61/57	118	C	51.6949	61	T	48.3051	57	CCCGGTAGAAGTTGTTTTAA	GAATTTCAAAATATGGTACC	CCCGGTAGAAGTTGTTTTAA	GAATTTCAAAATATGGTACC
BY4743_10-12	BY4743	WT	a/α	2n	XIV	772861	765450	SNP	1	T	A	2	T/A	53.4/46.6	55/48	103	T	53.3981	55	A	46.6019	48	ATCCAATATCCTTCGGGGGT	TCCTGCCTGGTTGGGATAGT	ATCCAATATCCTTCGGGGGT	TCCTGCCTGGTTGGGATAGT
BY4743_10-12	BY4743	WT	a/α	2n	XV	257168	253834	SNP	1	A	T	2	A/T	50.9/49.1	57/55	112	A	50.8929	57	T	49.1071	55	ACACAGGAGAAATGGAAATC	CTCCACAATTTGATATCAAC	ACACAGGAGAAATGGAAATC	CTCCACAATTTGATATCAAC
BY4743_10-12	BY4743	WT	a/α	2n	XV	502290	498956	SNP	1	G	C	1	C	100	100	100	C	100	100				CGAATTGGGAGATCGAAGCG	GGTATAAGGCCTCATTTGGG	CGAATTGGGAGATCGAAGCG	GGTATAAGGCCTCATTTGGG
BY4743_10-12	BY4743	WT	a/α	2n	XV	623499	615944	SNP	1	C	G	1	G	97.5	118	121	G	97.5207	118				ATTTTCAATCAATTGTTCAT	GGTTTCACTTTCTTCAAAGC	ATTTTCAATCAATTGTTCAT	GGTTTCACTTTCTTCAAAGC
BY4743_10-12	BY4743	WT	a/α	2n	XV	728585	719769	SNP	1	A	T	2	T/A	51.2/48.8	44/42	86	T	51.1628	44	A	48.8372	42	TCTATGCTAGAAACAACCTT	AAAACAACGTACTCCACTTT	TCTATGCTAGAAACAACCTT	AAAACAACGTACTCCACTTT
BY4743_10-12	BY4743	WT	a/α	2n	XV	800137	791321	SNP	1	T	C	2	T/C	50.5/49.5	47/46	93	T	50.5376	47	C	49.4624	46	GTTAGCCAGAAGACAGTTTT	TACCTTTTGAATATGAACGT	GTTAGCCAGAAGACAGTTTT	TACCTTTTGAATATGAACGT
BY4743_10-12	BY4743	WT	a/α	2n	XVI	131747	118838	SNP	1	C	A	1	A	100	109	109	A	100	109				CACCGCAACACTTTTTGGAG	ATTCGATGAAGAGTACTTGG	CACCGCAACACTTTTTGGAG	ATTCGATGAAGAGTACTTGG
BY4743_10-12	BY4743	WT	a/α	2n	XVI	271189	258274	SNP	1	T	C	2	T/C	54.7/45.3	70/58	128	T	54.6875	70	C	45.3125	58	GATGAGAAACATAACGCCTC	TTAGATAAATTATCATCACC	GATGAGAAACATAACGCCTC	TTAGATAAATTATCATCACC
BY4743_10-12	BY4743	WT	a/α	2n	XVI	510152	493076	SNP	1	A	T	2	T/A	53.0/47.0	53/47	100	T	53	53	A	47	47	ACTTTGATATTTTATTCCGC	TATATATTCTTTTTTTCGCG	ACTTTGATATTTTATTCCGC	TATATATTCTTTTTTTCGCG
BY4743_10-12	BY4743	WT	a/α	2n	XVI	647226	630150	SNP	1	A	G	2	A/G	54.5/45.5	48/40	88	A	54.5455	48	G	45.4545	40	CCATCTTGTAATATATAATA	CAAAATGCATCACCATACTT	CCATCTTGTAATATATAATA	CAAAATGCATCACCATACTT
BY4743_10-12	BY4743	WT	a/α	2n	XVI	838447	816672	SNP	1	T	A	2	T/A	52.2/47.8	72/66	138	T	52.1739	72	A	47.8261	66	TCAAACCCACAAGGTTGTCT	TGTAGCCATATAGTTCACCG	TCAAACCCACAAGGTTGTCT	TGTAGCCATATAGTTCACCG
BY4743_10-12	BY4743	WT	a/α	2n	XVI	880325	853206	SNP	1	C	T	2	C/T	54.9/45.1	79/65	144	C	54.8611	79	T	45.1389	65	GCGGGATCGAACCGCTGATC	CCGCGTTATTAGCACGGTGC	GCGGGATCGAACCGCTGATC	CCGCGTTATTAGCACGGTGC
BY4743_10-12	BY4743	WT	a/α	2n	XVI	882456	855337	SNP	1	T	C	2	T/C	53.0/47.0	71/63	134	T	52.9851	71	C	47.0149	63	GCATCTAGAGGACAATATGC	GCACAAAAACGACCAATATT	GCATCTAGAGGACAATATGC	GCACAAAAACGACCAATATT
BY4743_10-12	BY4743	WT	a/α	2n	III	103127	95332	DIP	1	G	-	2	-/G	51.1/48.9	68/65	133	-	51.1278	68	G	48.8722	65	TCCTCTGCCACGGCCTCCTC	GCGAGGGGGCCAGTTCCTAT	TCCTCTGCCACGGCCTCCTC	GCGAGGGGGCCAGTTCCTAT
BY4743_10-12	BY4743	WT	a/α	2n	IV	748525	733758	DIP	1	A	-	1	-	69.4	59	85	-	69.4118	59				TACTTAGATTATACATAATT	AAAAAAAAAAAAACTTTTTT	TACTTAGATTATACATAATT	AAAAAAAAAAAAACTTTTTT
BY4743_10-13	BY4743	WT	a/α	2n	I	47027	46880	SNP	1	C	G	2	C/G	50.0/50.0	83/83	166	C	50	83	G	50	83	TTAAGGCGCTATTGGAAGTT	TTACAAGAGCAAGAATATTG	TTAAGGCGCTATTGGAAGTT	TTACAAGAGCAAGAATATTG
BY4743_10-13	BY4743	WT	a/α	2n	I	106421	106274	SNP	1	A	G	1	G	100	156	156	G	100	156				GAATCCGGCGTATAGGACGA	CCGCATGATACGGCCGCACT	GAATCCGGCGTATAGGACGA	CCGCATGATACGGCCGCACT
BY4743_10-13	BY4743	WT	a/α	2n	II	560082	557127	SNP	1	G	A	2	A/G	50.4/49.6	63/62	125	A	50.4	63	G	49.6	62	GAACTATCCTTCGAACATGA	CGGTGAATTAGCAAATTACA	GAACTATCCTTCGAACATGA	CGGTGAATTAGCAAATTACA
BY4743_10-13	BY4743	WT	a/α	2n	II	681860	678905	SNP	1	C	T	2	C/T	51.9/48.1	42/39	81	C	51.8519	42	T	48.1481	39	AGCCAAAAGGCAAAGAGATT	GTGGGGATTTAAAAAAAAAA	AGCCAAAAGGCAAAGAGATT	GTGGGGATTTAAAAAAAAAA
BY4743_10-13	BY4743	WT	a/α	2n	III	4272	4272	SNP	1	A	C	1	C	98.5	66	67	C	98.5075	66				ACATGTAGAAAGGTCCAATA	ACTTACTATATTATGACATA	ACATGTAGAAAGGTCCAATA	ACTTACTATATTATGACATA
BY4743_10-13	BY4743	WT	a/α	2n	IV	79793	78257	SNP	1	T	C	2	C/T	54.4/45.6	80/67	147	C	54.4218	80	T	45.5782	67	CATCTGAGGTATCTTGAGTG	TTAGTGCACCAGATAGATAT	CATCTGAGGTATCTTGAGTG	TTAGTGCACCAGATAGATAT
BY4743_10-13	BY4743	WT	a/α	2n	IV	175038	173502	SNP	1	T	A	2	A/T	53.5/46.5	53/46	99	A	53.5354	53	T	46.4646	46	TTAAGCACGAGGCTGGGGTG	TGGAAAAATCTAGAGCTCCT	TTAAGCACGAGGCTGGGGTG	TGGAAAAATCTAGAGCTCCT
BY4743_10-13	BY4743	WT	a/α	2n	IV	300713	299177	SNP	1	T	C	2	T/C	50.4/49.6	57/56	113	T	50.4425	57	C	49.5575	56	GAGATAGAATGGCCAGATAT	CTCTTTCGAATTCGGGAAAC	GAGATAGAATGGCCAGATAT	CTCTTTCGAATTCGGGAAAC
BY4743_10-13	BY4743	WT	a/α	2n	IV	419193	417660	SNP	1	A	C	2	C/A	52.7/47.3	59/53	112	C	52.6786	59	A	47.3214	53	TTTGGAACTGGGGGAGGAGC	TGCTTGGGAGCTGCAGCGGT	TTTGGAACTGGGGGAGGAGC	TGCTTGGGAGCTGCAGCGGT
BY4743_10-13	BY4743	WT	a/α	2n	IV	519851	517525	SNP	1	T	A	2	T/A	54.1/45.9	33/28	61	T	54.0984	33	A	45.9016	28	CTTATTTTTTTCCTCAATCT	CGATATTAGACATTTTTTTT	CTTATTTTTTTCCTCAATCT	CGATATTAGACATTTTTTTT
BY4743_10-13	BY4743	WT	a/α	2n	IV	1131154	1111433	SNP	1	A	T	1	T	55.8	43	77	T	55.8442	43				TGAATTCTATTCGACAGGGC	CCAAGAGAATTGGTGTATCA	TGAATTCTATTCGACAGGGC	CCAAGAGAATTGGTGTATCA
BY4743_10-13	BY4743	WT	a/α	2n	IV	1194764	1174348	SNP	1	T	C	2	T/C	55.0/45.0	61/50	111	T	54.955	61	C	45.045	50	GGATACGCAGTATAGTTCGG	CAGTTTTCTATCTCTTTCAT	GGATACGCAGTATAGTTCGG	CAGTTTTCTATCTCTTTCAT
BY4743_10-13	BY4743	WT	a/α	2n	IV	1397327	1374171	SNP	1	A	G	2	G/A	51.6/48.4	94/88	182	G	51.6484	94	A	48.3516	88	CATACCTAGTAGTACCAAGG	TAGGCCCGGTGCAAATTCCA	CATACCTAGTAGTACCAAGG	TAGGCCCGGTGCAAATTCCA
BY4743_10-13	BY4743	WT	a/α	2n	V	213194	212098	SNP	1	T	C	2	T/C	53.3/46.7	72/63	135	T	53.3333	72	C	46.6667	63	TCATTAGTTATTTACTTTAC	GGAAACCTGTTATACGGATG	TCATTAGTTATTTACTTTAC	GGAAACCTGTTATACGGATG
BY4743_10-13	BY4743	WT	a/α	2n	VI	269476	264627	SNP	1	A	G	2	G/A	54.4/45.6	86/72	158	G	54.4304	86	A	45.5696	72	ACTGGAAGATTCGACAAATA	AAATTCAGCTTTTTCAAGTG	ACTGGAAGATTCGACAAATA	AAATTCAGCTTTTTCAAGTG
BY4743_10-13	BY4743	WT	a/α	2n	VII	4743	4747	SNP	1	C	T	2	C/T	50.3/49.7	72/71	143	C	50.3497	72	T	49.6503	71	CGCAATATACTGCTATTCAT	CTTTGTATTTGCTGTTTCCT	CGCAATATACTGCTATTCAT	TTTGTATTTGCTGTTTCCTT
BY4743_10-13	BY4743	WT	a/α	2n	VII	4747	4751	SNP	1	G	T	2	G/T	50.4/49.6	69/68	137	G	50.365	69	T	49.635	68	ATATACTGCTATTCATCTTT	TATTTGCTGTTTCCTTTTAT	ATATACTGCTATTCATCTTT	TATTTGCTGTTTCCTTTTAT
BY4743_10-13	BY4743	WT	a/α	2n	VII	259026	259031	SNP	1	T	C	2	C/T	54.2/45.8	71/60	131	C	54.1985	71	T	45.8015	60	CAGTTTCTGAATACGTTTGG	TCGAAAATTTGTCTCTCTCA	CAGTTTCTGAATACGTTTGG	TCGAAAATTTGTCTCTCTCA
BY4743_10-13	BY4743	WT	a/α	2n	VII	858239	844897	SNP	1	A	G	2	A/G	52.1/47.9	74/68	142	A	52.1127	74	G	47.8873	68	ATATCTGTCAGTTCAAACCA	TCAATCTTTTCTCTCCAACA	ATATCTGTCAGTTCAAACCA	TCAATCTTTTCTCTCCAACA
BY4743_10-13	BY4743	WT	a/α	2n	VIII	198117	196361	SNP	1	T	G	2	G/T	53.2/46.8	67/59	126	G	53.1746	67	T	46.8254	59	GGTTTTTACCGATTCCCAAA	TAACTTTTCGACCTGTTTAT	GGTTTTTACCGATTCCCAAA	TAACTTTTCGACCTGTTTAT
BY4743_10-13	BY4743	WT	a/α	2n	IX	196479	181174	SNP	1	G	C	2	G/C	53.0/47.0	87/77	164	G	53.0488	87	C	46.9512	77	CAGAGAGAAATAATTATTAA	AACGATATGAATTACTGACG	CAGAGAGAAATAATTATTAA	AACGATATGAATTACTGACG
BY4743_10-13	BY4743	WT	a/α	2n	IX	328827	313521	SNP	1	A	T	2	A/T	51.9/48.1	67/62	129	A	51.938	67	T	48.062	62	TAAAATATAATTCAAGTAAA	GACACCAGCTACACGGGCAG	TAAAATATAATTCAAGTAAA	GACACCAGCTACACGGGCAG
BY4743_10-13	BY4743	WT	a/α	2n	XI	186485	186489	SNP	1	G	A	1	A	98.6	142	144	A	98.6111	142				ATAAATCGAGGAGATCCTGT	ACACTATATTGCCGCCCGAA	ATAAATCGAGGAGATCCTGT	ACACTATATTGCCGCCCGAA
BY4743_10-13	BY4743	WT	a/α	2n	XII	69509	63353	SNP	1	T	C	1	C	55	71	129	C	55.0388	71				CCTATTTCTCTCGGACAACA	CTCTGCCAAGGTTCAAATTT	CCTATTTCTCTCGGACAACA	CTCTGCCAAGGTTCAAATTT
BY4743_10-13	BY4743	WT	a/α	2n	XII	944445	901503	SNP	1	C	A	1	A	98.8	79	80	A	98.75	79				AATACAATATTCTTCCATCT	CTGTACGATCTCGTACACCC	AATACAATATTCTTCCATCT	CTATACGATCTCGTACACCC
BY4743_10-13	BY4743	WT	a/α	2n	XII	944448	901506	SNP	1	G	A	1	A	100	75	75	A	100	75				ACAATATTCTTCCATCTCCT	TACGATCTCGTACACCCCAT	ACAATATTCTTCCATCTACT	TACGATCTCGTACACCCCAT
BY4743_10-13	BY4743	WT	a/α	2n	XII	946167	903074	SNP	1	G	T	2	G/T	53.9/46.1	83/71	154	G	53.8961	83	T	46.1039	71	TTGGTCTAGCTTCATATGTT	GATATAAATTTAGATTTGAC	TTGGTCTAGCTTCATATGTT	GATATAAATTTAGATTTGAC
BY4743_10-13	BY4743	WT	a/α	2n	XIII	432851	418682	SNP	1	T	A	2	T/A	50.9/49.1	56/54	110	T	50.9091	56	A	49.0909	54	TATTCGGGAACTTTATGGTC	CGGAGCGACAATTTTGTTAT	TATTCGGGAACTTTATGGTC	CGGAGCGACAATTTTGTTAT
BY4743_10-13	BY4743	WT	a/α	2n	XIII	722784	708615	SNP	1	T	C	1	C	55.8	67	120	C	55.8333	67				TCTTCGTCATCCTCCTCGTC	TCGTCCACTTCATCCTCTTC	TCTTCGTCATCCTCCTCGTC	TCGTCCACTTCATCCTCTTC
BY4743_10-13	BY4743	WT	a/α	2n	XIV	202507	197006	SNP	1	C	T	1	T	100	67	67	T	100	67				TGTATCATCACAACAAATTC	ATTGAAGGACCATACGTCAC	TGTATCATCACAACAAATTC	ATTGAAGGACCATACGTCAC
BY4743_10-13	BY4743	WT	a/α	2n	XIV	215970	210469	SNP	1	T	C	1	C	98.5	65	66	C	98.4848	65				ATTATAGTGCATTATCATTA	CTATCTAAATTTGCCTTTAC	ATTATAGTGCATTATCATTA	CTATCTAAATTTGCCTTTAC
BY4743_10-13	BY4743	WT	a/α	2n	XIV	716209	710143	SNP	1	C	T	1	T	67.7	65	96	T	67.7083	65				TTTGTTGTCTTTGTTGACAA	AACACAGAGTAAGAAAAAGC	TTTGTTGTCTTTGTTGACAA	AACACAGAGTAAGAAAAAGC
BY4743_10-13	BY4743	WT	a/α	2n	XV	208339	205491	SNP	1	C	T	2	T/C	54.6/45.4	77/64	141	T	54.6099	77	C	45.3901	64	TGAACTTAGCGATTTGAACT	TTTTGAAGTTCGTAGTTGTC	TGAACTTAGCGATTTGAACT	TTTTGAAGTTCGTAGTTGTC
BY4743_10-13	BY4743	WT	a/α	2n	XV	289582	286734	SNP	1	C	A	2	C/A	54.3/45.7	70/59	129	C	54.2636	70	A	45.7364	59	CTGATAGTGAGGCCAACCTC	GTGGTGATTCAAGAACGAAT	CTGATAGTGAGGCCAACCTC	GTGGTGATTCAAGAACGAAT
BY4743_10-13	BY4743	WT	a/α	2n	XV	507886	505038	SNP	1	A	T	2	A/T	51.3/48.7	59/56	115	A	51.3043	59	T	48.6957	56	ATATGCAGTGTATAAGTTGA	GGAATATAGGAATATATATC	ATATGCAGTGTATAAGTTGA	GGAATATAGGAATATATATC
BY4743_10-13	BY4743	WT	a/α	2n	XV	509001	506153	SNP	1	A	G	2	A/G	50.4/49.6	69/68	137	A	50.365	69	G	49.635	68	TCGGGAGCCCCAAAACTAAA	GATGGTTTTGTGCTAGTGGT	TCGGGAGCCCCAAAACTAAA	GATGGTTTTGTGCTAGTGGT
BY4743_10-13	BY4743	WT	a/α	2n	XV	580051	577203	SNP	1	C	A	2	A/C	54.0/46.0	61/52	113	A	53.9823	61	C	46.0177	52	GCCCTAAGGTTTTAGTTTCT	ATCATAGTCATATCAGAAAA	GCCCTAAGGTTTTAGTTTCT	ATCATAGTCATATCAGAAAA
BY4743_10-13	BY4743	WT	a/α	2n	XV	809948	802698	SNP	1	A	C	2	C/A	54.6/45.4	71/59	130	C	54.6154	71	A	45.3846	59	CGGATTGAAATTTTCTTTAG	AAGTTCTAGATCATGCTTTT	CGGATTGAAATTTTCTTTAG	AAGTTCTAGATCATGCTTTT
BY4743_10-13	BY4743	WT	a/α	2n	XV	888345	881095	SNP	1	C	T	2	C/T	50.7/48.7	77/74	152	C	50.6579	77	T	48.6842	74	GAAGTGCTATCCCAGAGACT	CAAAAACATGCGAATATATT	GAAGTGCTATCCCAGAGACT	CAAAAACATGCGAATATATT
BY4743_10-13	BY4743	WT	a/α	2n	XV	952967	945717	SNP	1	G	C	1	C	55.8	77	138	C	55.7971	77				GATTCCTTGGATATACTGTC	TACAATCCACAAAAAATCGC	GATTCCTTGGATATACTGTC	TACAATCCACAAAAAATCGC
BY4743_10-13	BY4743	WT	a/α	2n	XV	1028469	1020790	SNP	1	T	C	2	T/C	54.7/45.3	81/67	148	T	54.7297	81	C	45.2703	67	CAATAAAGCTTCACCTCTGG	TAAAGCCTTGGTAGATTCTC	CAATAAAGCTTCACCTCTGG	TAAAGCCTTGGTAGATTCTC
BY4743_10-13	BY4743	WT	a/α	2n	XVI	21508	14376	SNP	1	A	T	2	T/A	50.4/49.6	68/67	135	T	50.3704	68	A	49.6296	67	CTTCAGCAGTAACACGCTGG	GTTTTTACGAATGTAGGCAG	CTTCAGCAGTAACACGCTGG	GTTTTTACGAATGTAGGCAG
BY4743_10-13	BY4743	WT	a/α	2n	XVI	78745	67439	SNP	1	T	C	2	T/C	52.1/47.9	74/68	142	T	52.1127	74	C	47.8873	68	TTATCATTTTCTGACGACCT	TCTGGGGTTACTTCACTACT	TTATCATTTTCTGACGACCT	TCTGGGGTTACTTCACTACT
BY4743_10-13	BY4743	WT	a/α	2n	XVI	100181	88875	SNP	1	A	G	2	A/G	52.6/47.4	82/74	156	A	52.5641	82	G	47.4359	74	GGAGAAGATAAAAGGATGGA	CCAGCAGAAATGCATTAATA	GGAGAAGATAAAAGGATGGA	CCAGCAGAAATGCATTAATA
BY4743_10-13	BY4743	WT	a/α	2n	XVI	188843	177528	SNP	1	G	C	2	G/C	52.9/47.1	54/48	102	G	52.9412	54	C	47.0588	48	CTTACGATTTTTTTTTTTTC	TTATGAACCCTGTGCCCGAG	CTTACGATTTTTTTTTTTTC	TTATGAACCCTGTGCCCGAG
BY4743_10-13	BY4743	WT	a/α	2n	XVI	333426	322111	SNP	1	T	C	1	C	57.9	66	114	C	57.8947	66				TCAGGGAGATTGGGTATAAG	TCTATAGAAGATTGTCTCAA	TCAGGGAGATTGGGTATAAG	TCTATAGAAGATTGTCTCAA
BY4743_10-13	BY4743	WT	a/α	2n	XVI	336554	325239	SNP	1	T	G	2	G/T	51.6/48.4	63/59	122	G	51.6393	63	T	48.3607	59	TTTCTGCTAAATGTACCACT	TCCTATCCTTGTTAGGCTTG	TTTCTGCTAAATGTACCACT	TCCTATCCTTGTTAGGCTTG
BY4743_10-13	BY4743	WT	a/α	2n	XVI	345871	334556	SNP	1	C	G	2	G/C	54.5/45.5	72/60	132	G	54.5455	72	C	45.4545	60	CTCAATCATCAACTCACCAG	TCTATAACCATCAAATCGGG	CTCAATCATCAACTCACCAG	TCTATAACCATCAAATCGGG
BY4743_10-13	BY4743	WT	a/α	2n	XVI	352981	341666	SNP	1	T	A	2	T/A	54.3/45.7	69/58	127	T	54.3307	69	A	45.6693	58	CATTAATTTCTTCTTCGCAT	CTAGACGTTTTTTGATGAAA	CATTAATTTCTTCTTCGCAT	CTAGACGTTTTTTGATGAAA
BY4743_10-13	BY4743	WT	a/α	2n	XVI	373254	361939	SNP	1	T	C	2	C/T	51.8/48.2	58/54	112	C	51.7857	58	T	48.2143	54	AAAGAAGGGGTGGGATAGCG	CAAGATGACACTTCTACTTT	AAAGAAGGGGTGGGATAGCG	CAAGATGACACTTCTACTTT
BY4743_10-13	BY4743	WT	a/α	2n	Mito	33187	33187	SNP	1	A	G	1	G	67.5	619	917	G	67.5027	619				ATATAATTTCATTATTAATA	AATATCTCCTGCGGGGTTCG	ATATAATTTCATTATTAATA	ATATCTCCTGCGGGGTTCGG
BY4743_10-13	BY4743	WT	a/α	2n	Mito	34808	34810	SNP	1	A	G	1	G	99	768	776	G	98.9691	768				ATAAATATATTTAATTAATA	GTATATATATATAATAATAT	ATAAATATATTTAATTAATA	GTATATATATATAATAATAT
BY4743_10-13	BY4743	WT	a/α	2n	Mito	823	823	DIP	1	-	A	1	A	55.1	612	1110	A	55.1351	612				TAATAATTTAATTAACCATT	AAAAAAAAGTATATATATTT	TAATAATTTAATTAACCATT	AAAAAAAAGTATATATATTT
BY4743_10-14	BY4743	WT	a/α	2n	I	199934	197235	SNP	1	T	C	2	C/T	54.1/45.9	33/28	61	C	54.0984	33	T	45.9016	28	TTTTTTTTTTTTTTTTGAGA	TTCTTCATATTCTGTTATTA	TTTTTTTTTTTTTTTTGAGA	TCTTCATATTCTGTTATTAA
BY4743_10-14	BY4743	WT	a/α	2n	IV	229645	226609	SNP	1	T	C	2	C/T	54.3/45.7	51/43	94	C	54.2553	51	T	45.7447	43	CCTTTAAACCCATACATATC	TACACAAAACATCCGTACAT	CCTTTAAACCCATACATATC	TACACAAAACATCCGTACAT
BY4743_10-14	BY4743	WT	a/α	2n	IV	264421	261385	SNP	1	G	T	2	G/T	53.3/45.7	49/42	92	G	53.2609	49	T	45.6522	42	GGTAGATAGAATAGACAAAT	GAGTTATTGAAATATTTATA	GGTAGATAGAATAGACAAAT	GAGTTATTGAAATATTTATA
BY4743_10-14	BY4743	WT	a/α	2n	IV	545846	534820	SNP	1	T	A	2	A/T	50.0/48.4	31/30	62	A	50	31	T	48.3871	30	CGTAGAAGTATGTCTTAATG	AGAAGGTTGAGAACAACCGG	CGTAGAAGTATGTCTTAATG	AGAAGGTTGAGAACAACCGG
BY4743_10-14	BY4743	WT	a/α	2n	IV	907787	891309	SNP	1	T	C	1	C	98.5	67	68	C	98.5294	67				TTCTCAGTTAAAAAACGAAT	TGACATTATGGCCTCTAAAG	TTCTCAGTTAAAAAACGAAT	TGACATTATGGCCTCTAAAG
BY4743_10-14	BY4743	WT	a/α	2n	IV	1001711	981038	SNP	1	T	A	1	A	97.1	68	70	A	97.1429	68				CATGACTTCTTCATTCTCCG	TCTGCAAATCAAACAGCTTT	CATGACTTCTTCATTCTCCG	TCTGCAAATCAAACAGCTTT
BY4743_10-14	BY4743	WT	a/α	2n	IV	1004982	984309	SNP	1	T	C	2	T/C	51.4/48.6	37/35	72	T	51.3889	37	C	48.6111	35	GGGATTTCAAAGATTATGTT	CAGAAGTGATAATTGAGGAA	GGGATTTCAAAGATTATGTT	CAGAAGTGATAATTGAGGAA
BY4743_10-14	BY4743	WT	a/α	2n	IV	1267951	1237459	SNP	1	G	C	1	C	99	99	100	C	99	99				TTCCAGCAGGCGATTCTGTT	CACAACTTTTGGTTGCATCC	TTCCAGCAGGCGATTCTGTT	CACAACTTTTGGTTGCATCC
BY4743_10-14	BY4743	WT	a/α	2n	V	77918	77914	SNP	1	C	T	2	T/C	50.8/49.2	64/62	126	T	50.7937	64	C	49.2063	62	TAGTTTCCAAATTAAAACTG	AGAAGAGGCTTTTAAAACAT	TAGTTTCCAAATTAAAACTG	AGAAGAGGCTTTTAAAACAT
BY4743_10-14	BY4743	WT	a/α	2n	V	434633	433531	SNP	1	T	A	2	T/A	52.5/47.5	63/57	120	T	52.5	63	A	47.5	57	GACTTTTCAATGGAGAACTG	TGTATTACGGGCTCGAGTAA	GACTTTTCAATGGAGAACTG	TGTATTACGGGCTCGAGTAA
BY4743_10-14	BY4743	WT	a/α	2n	V	442096	440994	SNP	1	T	C	2	T/C	51.4/48.6	71/67	138	T	51.4493	71	C	48.5507	67	GCCCTTTGGGCAAGGGATAG	TCTCTATTCCGCACCGTGCC	GCCCTTTGGGCAAGGGATAG	TCTCTATTCCGCACCGTGCC
BY4743_10-14	BY4743	WT	a/α	2n	V	442190	441088	SNP	1	C	G	2	G/C	55.0/45.0	72/59	131	G	54.9618	72	C	45.0382	59	CTGCCCGGAGGCGGGAGAGT	CGTTCTGAAGTGTCCCGGCT	CTGCCCGGAGGCGGGAGAGT	CGTTCTGAAGTGTCCCGGCT
BY4743_10-14	BY4743	WT	a/α	2n	V	558228	548716	SNP	1	T	C	1	C	56.5	74	131	C	56.4885	74				CCAAAGTACATACTGACATT	TGTGCAGTATTGCTTTCAAA	CCAAAGTACATACTGACATT	TGTGCAGTATTGCTTTCAAA
BY4743_10-14	BY4743	WT	a/α	2n	VII	81318	81323	SNP	1	A	T	2	T/A	51.8/48.2	71/66	137	T	51.8248	71	A	48.1752	66	CTTTTACCTTTTCTATCCGT	TTTCTCTATCCGATACAACA	CTTTTACCTTTTCTATCCGT	TTTCTCTATCCGATACAACA
BY4743_10-14	BY4743	WT	a/α	2n	VII	99113	99118	SNP	1	A	G	1	G	61.5	80	130	G	61.5385	80				AAAACCCGTACCAGAAGACG	CCATATTGCATAATTGGTTG	AAAACCCGTACCAGAAGACG	CCATATTGCATAATTGGTTG
BY4743_10-14	BY4743	WT	a/α	2n	VII	104490	104495	SNP	1	T	C	2	T/C	52.1/47.9	62/57	119	T	52.1008	62	C	47.8992	57	TCAATTAGTTCCAGTTTTAA	CCATTGGTCATGAATGCTTG	TCAATTAGTTCCAGTTTTAA	CCATTGGTCATGAATGCTTG
BY4743_10-14	BY4743	WT	a/α	2n	VII	277164	277169	SNP	1	G	T	2	T/G	54.7/45.3	52/43	95	T	54.7368	52	G	45.2632	43	TTTTCTTAATAGTTTTCTAC	TCGGCATGCGATTGTTTGGT	TTTTCTTAATAGTTTTCTAC	TCGGCATGCGATTGTTTGGT
BY4743_10-14	BY4743	WT	a/α	2n	VII	866990	850025	SNP	1	G	C	2	C/G	53.2/46.8	58/51	109	C	53.211	58	G	46.789	51	TCAACATCTAAGAATTGTTC	TCCAACGCTTGCATTAAAGG	TCAACATCTAAGAATTGTTC	TCCAACGCTTGCATTAAAGG
BY4743_10-14	BY4743	WT	a/α	2n	VII	910637	893672	SNP	1	A	T	2	T/A	54.9/45.1	56/46	102	T	54.902	56	A	45.098	46	GTTACATGATTCTTCTAATA	GAAATTCGATCAGTGGTACA	GTTACATGATTCTTCTAATA	GAAATTCGATCAGTGGTACA
BY4743_10-14	BY4743	WT	a/α	2n	VII	1058426	1041461	SNP	1	T	C	2	T/C	51.9/48.1	67/62	129	T	51.938	67	C	48.062	62	AGGTTTGCAAAGCAGCCTTT	CAGCAGCGTAATGACTGTCG	AGGTTTGCAAAGCAGCCTTT	CAGCAGCGTAATGACTGTCG
BY4743_10-14	BY4743	WT	a/α	2n	VIII	329310	324645	SNP	1	T	C	1	C	58.7	61	104	C	58.6538	61				ATACATCCAAGTCATGTTTC	GCTCCGTTACAACAATCTTC	ATACATCCAAGTCATGTTTC	GCTCCGTTACAACAATCTTC
BY4743_10-14	BY4743	WT	a/α	2n	VIII	462101	457436	SNP	1	C	A	2	A/C	50.0/50.0	52/52	104	A	50	52	C	50	52	TACTAAGTGTTCTTACCAAC	ATTGGATGCTCATTACAAAT	TACTAAGTGTTCTTACCAAC	ATTGGATGCTCATTACAAAT
BY4743_10-14	BY4743	WT	a/α	2n	VIII	511133	506466	SNP	1	A	G	2	G/A	50.5/49.5	54/53	107	G	50.4673	54	A	49.5327	53	TGGACGAAACCGGCTACACC	AAATGGTCGATTTCTGGTCT	TGGACGAAACCGGCTACACC	AAATGGTCGATTTCTGGTCT
BY4743_10-14	BY4743	WT	a/α	2n	IX	126122	109647	SNP	1	T	C	2	T/C	54.7/45.3	64/53	117	T	54.7009	64	C	45.2991	53	GGGGGAAGGGGGTAGGTAAA	AGAGTGAATAAGTTTTATTC	GGGGGAAGGGGGTAGGTAAA	AGAGTGAATAAGTTTTATTC
BY4743_10-14	BY4743	WT	a/α	2n	IX	292622	276146	SNP	1	A	G	2	G/A	54.4/45.6	62/52	114	G	54.386	62	A	45.614	52	CTATGTTTATTGCACATCAA	CCCCACATATATGTCTGCCA	CTATGTTTATTGCACATCAA	CCCCACATATATGTCTGCCA
BY4743_10-14	BY4743	WT	a/α	2n	XI	245083	245087	SNP	1	A	T	2	A/T	52.7/47.3	49/44	93	A	52.6882	49	T	47.3118	44	GATCTTTGAGGGTGACAGTT	ACTTGTTCTGGTCGACCGTG	GATCTTTGAGGGTGACAGTT	ACTTGTTCTGGTCGACCGTG
BY4743_10-14	BY4743	WT	a/α	2n	XII	108119	101096	SNP	1	G	T	2	G/T	53.2/46.8	42/37	79	G	53.1646	42	T	46.8354	37	TATCTATTTAGTTAGCGTAA	CACGAGGAGTTACTGCACTG	TATCTATTTAGTTAGCGTAA	CACGAGGAGTTACTGCACTG
BY4743_10-14	BY4743	WT	a/α	2n	XII	651138	604633	SNP	1	C	A	2	C/A	54.8/45.2	80/66	146	C	54.7945	80	A	45.2055	66	TGGAATCCCAACAATTATCT	AACACCCACACATTTCTCAT	TGGAATCCCAACAATTATCT	AACACCCACACATTTCTCAT
BY4743_10-14	BY4743	WT	a/α	2n	XII	651140	604635	SNP	1	A	T	2	A/T	53.7/46.3	79/68	147	A	53.7415	79	T	46.2585	68	GAATCCCAACAATTATCTCA	CACCCACACATTTCTCATGG	GAATCCCAACAATTATCTCA	CACCCACACATTTCTCATGG
BY4743_10-14	BY4743	WT	a/α	2n	XII	651141	604636	SNP	1	C	T	2	C/T	54.8/45.2	80/66	146	C	54.7945	80	T	45.2055	66	AATCCCAACAATTATCTCAA	ACCCACACATTTCTCATGGT	AATCCCAACAATTATCTCAA	ACCCACACATTTCTCATGGT
BY4743_10-14	BY4743	WT	a/α	2n	XII	701385	652543	SNP	1	A	T	1	T	100	70	70	T	100	70				AATGTCGACGATGATGACGA	GAAGAAGATGATGACGAAGA	AATGTCGACGATGATGACGA	GAAGAAGATGATGACGAAGA
BY4743_10-14	BY4743	WT	a/α	2n	XII	763398	714556	SNP	1	T	C	1	C	100	105	105	C	100	105				GACATGCATGGATTCTTTTA	CGTTTATTGAATGTCTGTTG	GACATGCATGGATTCTTTTA	CGTTTATTGAATGTCTGTTG
BY4743_10-14	BY4743	WT	a/α	2n	XII	792752	743911	SNP	1	T	A	1	A	100	71	71	A	100	71				GCGAAAAATAGAATTCAATA	GAACTGGAATGGCAATTATG	GCGAAAAATAGAATTCAATA	GAACTGGAATGGCAATTATG
BY4743_10-14	BY4743	WT	a/α	2n	XII	873222	824381	SNP	1	A	G	1	G	99.2	125	126	G	99.2063	125				AACGCATCCATGGGAGAGTC	TACAGTAACTCTAGAAATAC	AACGCATCCATGGGAGAGTC	TACAGTAACTCTAGAAATAC
BY4743_10-14	BY4743	WT	a/α	2n	XII	1064997	1012776	SNP	1	A	G	1	G	90	18	20	G	90	18				GTAAGTTGAGAGACAGGTTG	TCAGGGTTAGAGTAGGGTAG	GTAAGTTGAGAGACAGGTTG	TCAGGGTTGGATTGTGTTAG
BY4743_10-14	BY4743	WT	a/α	2n	XII	1065006	1012785	SNP	1	A	G	1	G	90.5	19	21	G	90.4762	19				GAGACAGGTTGATCAGGGTT	GAGTAGGGTAGTGTTAGGGT	GAGACAGGTTGGTCAGGGTT	GATTGTGTTAGTGTTAGGGT
BY4743_10-14	BY4743	WT	a/α	2n	XII	1065032	1012811	SNP	1	G	T	1	T	76.9	20	26	T	76.9231	20				GGGTAGTGTTAGGGTTAGGT	TGTGTGTGTGTGTGGGTGTG	TGTTAGTGTTAGGGTTAGGT	TGTGTGTGTGTGTGGGTGTG
BY4743_10-14	BY4743	WT	a/α	2n	XII	1065084	1012863	SNP	1	T	G	2	T/G	52.8/47.2	19/17	36	T	52.7778	19	G	47.2222	17	TGTGGGTGTGGTGTGGTGTG	GTGTGTGTGGTGTGTGGGTG	TGTGGGTGTGGTGTGGTGTG	GTGTGTGTGGTGTGTGGGTG
BY4743_10-14	BY4743	WT	a/α	2n	XIII	125391	121007	SNP	1	C	A	2	A/C	53.9/46.1	62/53	115	A	53.913	62	C	46.087	53	TCTCTGATGATTTTTTTGCA	CGTTGGACTCATTTCCATTG	TCTCTGATGATTTTTTTGCA	CGTTGGACTCATTTCCATTG
BY4743_10-14	BY4743	WT	a/α	2n	XIII	358200	344898	SNP	1	T	C	2	T/C	51.2/48.8	22/21	43	T	51.1628	22	C	48.8372	21	ATTTCATGTATTTACCTCTT	GGTATTTGATTTCCAAGCCA	ATTTCATGTATTTACCTCTT	GGTATTTGATTTCCAAGCCA
BY4743_10-14	BY4743	WT	a/α	2n	XIII	889068	871585	SNP	1	T	C	1	C	99.2	118	119	C	99.1597	118				TTTAACTGAACTTATCACCG	TTGGCCTTCCCTTTCGGTCA	TTTAACTGAACTTATCACCG	TTGGCCTTCCCTTTCGGTCA
BY4743_10-14	BY4743	WT	a/α	2n	XIV	162987	156959	SNP	1	T	A	2	T/A	51.5/48.5	51/48	99	T	51.5152	51	A	48.4848	48	TAGAGGCAAATTCAAAAAAC	TGGGAGAAAATCTTTTAAAC	TAGAGGCAAATTCAAAAAAC	TGGGAGAAAATCTTTTAAAC
BY4743_10-14	BY4743	WT	a/α	2n	XIV	359345	353314	SNP	1	C	T	2	C/T	51.6/48.4	16/15	31	C	51.6129	16	T	48.3871	15	TCACTGTTTCCATCTCTTTT	TTTTTTTTTTTTTTTTTTTT	TCACTGTTTCCATCTCTTTT	TTTTTTTTTTTTTTTTTTTT
BY4743_10-14	BY4743	WT	a/α	2n	XIV	369286	363255	SNP	1	T	A	1	A	56.5	39	69	A	56.5217	39				ACAAGGGCTCATTATTCGAC	TACCTATTTCCTTCTCTACA	ACAAGGGCTCATTATTCGAC	TACCTATTTCCTTCTCTACA
BY4743_10-14	BY4743	WT	a/α	2n	XIV	704490	697663	SNP	1	C	T	2	C/T	53.8/46.2	70/60	130	C	53.8462	70	T	46.1538	60	TCGACATCTACATCTCCAAG	TCTACATCTACCTCATCAAG	TCGACATCTACATCTCCAAG	TCTACATCTACCTCATCAAG
BY4743_10-14	BY4743	WT	a/α	2n	XV	34967	34967	SNP	1	G	T	2	G/T	50.7/49.3	71/69	140	G	50.7143	71	T	49.2857	69	GTAATGGTAGTATTTTCACC	TCATGGGTGTCTTTGAGCAA	GTAATGGTAGTATTTTCACC	TCATGGGTGTCTTTGAGCAA
BY4743_10-14	BY4743	WT	a/α	2n	XV	63979	63979	SNP	1	A	T	2	A/T	51.2/48.8	63/60	123	A	51.2195	63	T	48.7805	60	TATTCCTAGTAATGAATTAT	TATATTACTACTATAAGCAG	TATTCCTAGTAATGAATTAT	TATATTACTACTATAAGCAG
BY4743_10-14	BY4743	WT	a/α	2n	XV	290074	286788	SNP	1	A	G	2	G/A	52.2/47.8	48/44	92	G	52.1739	48	A	47.8261	44	ATGAACCAAACGATAGCCAC	TCAACAGCATGTCCTCCTAC	ATGAACCAAACGATAGCCAC	TCAACAGCATGTCCTCCTAC
BY4743_10-14	BY4743	WT	a/α	2n	XV	669982	662342	SNP	1	G	C	2	G/C	52.0/48.0	39/36	75	G	52	39	C	48	36	TTGAGATAGAACTTGGCTCC	CGTTTTTATCAAATCTCTTA	TTGAGATAGAACTTGGCTCC	CGTTTTTATCAAATCTCTTA
BY4743_10-14	BY4743	WT	a/α	2n	XV	683042	675402	SNP	1	T	A	2	T/A	50.6/49.4	40/39	79	T	50.6329	40	A	49.3671	39	TGTGTCACTAAGCAAGCAAC	TGTAATCAAGACCTCAATTC	TGTGTCACTAAGCAAGCAAC	TGTAATCAAGACCTCAATTC
BY4743_10-14	BY4743	WT	a/α	2n	XV	1003964	994185	SNP	1	G	C	1	C	98.2	111	113	C	98.2301	111				AGAATGTATGTCTTTATCCT	AAAGTAAAGAAAGGATTATA	AGAATGTATGTCTTTATCCT	AAAGTAAAGAAAGGATTATA
BY4743_10-14	BY4743	WT	a/α	2n	XVI	359831	347137	SNP	1	A	T	2	T/A	53.2/46.8	41/36	77	T	53.2468	41	A	46.7532	36	TGTATTTTGGGCGATAATCA	GGAGAATATCAGTGTCATAT	TGTATTTTGGGCGATAATCA	GGAGAATATCAGTGTCATAT
BY4743_10-14	BY4743	WT	a/α	2n	XVI	595770	579121	SNP	1	A	T	2	T/A	52.1/47.9	37/34	71	T	52.1127	37	A	47.8873	34	GTTTCTAGACAGCGAAGAAA	CAGTGATTTGGATGGCCTAC	GTTTCTAGACAGCGAAGAAA	CAGTGATTTGGATGGCCTAC
BY4743_10-15	BY4743	WT	a/α	2n	I	88870	88749	SNP	1	T	C	2	C/T	51.2/48.4	128/121	250	C	51.2	128	T	48.4	121	GTATAGGACCCAGAACATTG	CTCCATTCACCTCAGTAACA	GTATAGGACCCAGAACATTG	CTCCATTCACCTCAGTAACA
BY4743_10-15	BY4743	WT	a/α	2n	I	205313	203116	SNP	1	A	G	1	G	100	18	18	G	100	18				ACAACAGCCACTACTGCCAT	ACTACAACTCAGCCATGGAA	ACAACAGCCACTACTGCCAT	ACTACAACTCAGCCATGGAA
BY4743_10-15	BY4743	WT	a/α	2n	II	573079	570480	SNP	1	T	C	1	C	98.3	169	172	C	98.2558	169				CTGTTAGGAATTTCTATTAT	TGGGGATTGAAAGTTTTAAA	CTGTTAGGAATTTCTATTAT	TGGGGATTGAAAGTTTTAAA
BY4743_10-15	BY4743	WT	a/α	2n	III	170839	160834	SNP	1	C	T	2	C/T	50.2/49.8	102/101	203	C	50.2463	102	T	49.7537	101	AAAAGAGCCCTGAGATTTTC	ATTACCATCAACAGGACCAA	AAAAGAGCCCTGAGATTTTC	ATTACCATCAACAGGACCAA
BY4743_10-15	BY4743	WT	a/α	2n	IV	109937	107982	SNP	1	A	G	1	G	96.6	171	177	G	96.6102	171				ATTAATGCTGTATCGGGTCA	ACGCCACATCTCAACCGTAA	ATTAATGCTGTATCGGGTCA	ACGCCACATCTCAACCGTAA
BY4743_10-15	BY4743	WT	a/α	2n	IV	168425	166470	SNP	1	A	T	1	T	98.9	175	177	T	98.8701	175				ATGATATTTTTGGTAACCCA	TCACTCCTGAGGAATACGCA	ATGATATTTTTGGTAACCCA	TCACTCCTGAGGAATACGCA
BY4743_10-15	BY4743	WT	a/α	2n	V	302918	301812	SNP	1	A	G	2	G/A	52.2/47.8	83/76	159	G	52.2013	83	A	47.7987	76	TACCTTTTTGTCGTGGTTGA	CTTTACAGTTATGCTGGGAG	TACCTTTTTGTCGTGGTTGA	CTTTACAGTTATGCTGGGAG
BY4743_10-15	BY4743	WT	a/α	2n	VI	90223	89967	SNP	1	A	G	1	G	55.5	116	209	G	55.5024	116				GCACTGGCTCCAGCACCTGA	TCGCCTTTTGAGAATGAATC	GCACTGGCTCCAGCACCTGA	TCGCCTTTTGAGAATGAATC
BY4743_10-15	BY4743	WT	a/α	2n	VII	12481	12486	SNP	1	T	A	2	T/A	54.6/45.4	113/94	207	T	54.5894	113	A	45.4106	94	AAGACTAGAACAACTCTTGG	CAAATATCTTTATTCCATAT	AAGACTAGAACAACTCTTGG	CAAATATCTTTATTCCATAT
BY4743_10-15	BY4743	WT	a/α	2n	VII	531651	531658	SNP	1	C	G	1	G	59.3	86	145	G	59.3103	86				GAATGGGCGCTTGTCGCGTG	CAGATCGGGGTTCAATTCCC	GAATGGGCGCTTGTCGCGTG	CAGATCGGGGTTCAATTCCC
BY4743_10-15	BY4743	WT	a/α	2n	VII	1038955	1025338	SNP	1	T	C	1	C	98.2	217	221	C	98.19	217				GTATCCAATGGCCTTTCATT	CTTGCTCTTGTAGGATTTGA	GTATCCAATGGCCTTTCATT	CTTGCTCTTGTAGGATTTGA
BY4743_10-15	BY4743	WT	a/α	2n	VIII	116809	114792	SNP	1	C	G	2	C/G	50.0/50.0	114/114	228	C	50	114	G	50	114	GGACATTGTTAAAAAAGGTT	TTTTATTAGGTCTACAAAAA	GGACATTGTTAAAAAAGGTT	TTTTATTAGGTCTACAAAAA
BY4743_10-15	BY4743	WT	a/α	2n	VIII	117968	115951	SNP	1	A	C	2	A/C	52.7/47.3	98/88	186	A	52.6882	98	C	47.3118	88	AAAGTTAGAACCTGCGAAAC	GAACCATCCACAGAAAGACT	AAAGTTAGAACCTGCGAAAC	GAACCATCCACAGAAAGACT
BY4743_10-15	BY4743	WT	a/α	2n	VIII	411563	408195	SNP	1	T	C	2	T/C	50.3/49.7	93/92	185	T	50.2703	93	C	49.7297	92	CTTGAAGCCCCATAACTTTG	TTTATGGTTAACTATTCTGG	CTTGAAGCCCCATAACTTTG	TTTATGGTTAACTATTCTGG
BY4743_10-15	BY4743	WT	a/α	2n	VIII	556937	548658	SNP	1	T	G	2	T/G	54.0/46.0	335/285	620	T	54.0323	335	G	45.9677	285	TGTGGGTGTGTGTGGGTGTG	GTGTGTGGGTGTGTGTGGGT	TGTGGGTGTGTGTGGGTGTG	GTGTGTGGGTGTGTGTGGGT
BY4743_10-15	BY4743	WT	a/α	2n	VIII	556955	548676	SNP	1	G	T	2	G/T	54.9/45.1	478/393	871	G	54.8794	478	T	45.1206	393	TGTGTGTGTGGGTGTGTGTG	GGTGTGGGTGTGGGTGTGGG	TGTGTGTGTGGGTGTGTGTG	GTGTGGGTGTGGGTGTGGGT
BY4743_10-15	BY4743	WT	a/α	2n	X	75216	62112	SNP	1	T	A	2	T/A	53.7/46.3	122/105	227	T	53.7445	122	A	46.2555	105	TTGATAATGACCTTGGAGGA	GGTCTGATTAAAACTTGACG	TTGATAATGACCTTGGAGGA	GGTCTGATTAAAACTTGACG
BY4743_10-15	BY4743	WT	a/α	2n	X	492430	474242	SNP	1	T	A	2	T/A	53.9/46.1	90/77	167	T	53.8922	90	A	46.1078	77	TAGCAGATTTTTTTGGCTTC	GTGGCTTTTGTGATGAAAGA	TAGCAGATTTTTTTGGCTTC	GTGGCTTTTGTGATGAAAGA
BY4743_10-15	BY4743	WT	a/α	2n	XIII	308215	296669	SNP	1	C	T	1	T	55.3	109	197	T	55.3299	109				GAAAGATTGACGAACTTGCC	ATGAAAATAGAAGCCTGCTT	GAAAGATTGACGAACTTGCC	ATGAAAATAGAAGCCTGCTT
BY4743_10-15	BY4743	WT	a/α	2n	XIV	707640	701799	SNP	1	C	T	1	T	98.5	131	133	T	98.4962	131				AATATGTACCTCCCAAATCA	ACTCATCATCTCATACGAAA	AATATGTACCTCCCAAATCA	ACTCATCATCTCATACGAAA
BY4743_10-15	BY4743	WT	a/α	2n	XIV	731167	725326	SNP	1	C	A	1	A	99.2	123	124	A	99.1935	123				TATCTACAGACTATTTTGTG	ACCTATAAAATAAATTTTGT	TATCTACAGACTATTTTGTG	ACCTATAAAATAAATTTTGT
BY4743_10-15	BY4743	WT	a/α	2n	XV	568762	565702	SNP	1	T	C	2	T/C	50.7/49.3	76/74	150	T	50.6667	76	C	49.3333	74	CTTTGGTAATGATAGATTCG	CATGGATAGAGTGTAGCACT	CTTTGGTAATGATAGATTCG	CATGGATAGAGTGTAGCACT
BY4743_10-15	BY4743	WT	a/α	2n	XV	623965	617588	SNP	1	C	G	2	C/G	52.8/47.2	75/67	142	C	52.8169	75	G	47.1831	67	TTTGTGGTGTTATGACTACC	CAAGTGCCATGCCTAGATTT	TTTGTGGTGTTATGACTACC	CAAGTGCCATGCCTAGATTT
BY4743_10-15	BY4743	WT	a/α	2n	XV	939646	932206	SNP	1	T	C	2	T/C	52.2/47.8	105/96	201	T	52.2388	105	C	47.7612	96	ACTCTCTAGAAATAGTAATG	CCCTTTCCAGCTCAACCAAA	ACTCTCTAGAAATAGTAATG	CCCTTTCCAGCTCAACCAAA
BY4743_10-15	BY4743	WT	a/α	2n	XVI	25185	17769	SNP	1	C	A	2	A/C	51.9/48.1	107/99	206	A	51.9417	107	C	48.0583	99	GAACTGGAAAACAGAGGTAT	AAAGTTGCAAATCCCGTGTG	GAACTGGAAAACAGAGGTAT	AAAGTTGCAAATCCCGTGTG
BY4743_10-15	BY4743	WT	a/α	2n	XVI	63200	51784	SNP	1	C	G	2	G/C	51.4/48.6	109/103	212	G	51.4151	109	C	48.5849	103	CTTAAACAACAAGCAGACTG	TATCAAGTATAGTATACAGA	CTTAAACAACAAGCAGACTG	TATCAAGTATAGTATACAGA
BY4743_10-15	BY4743	WT	a/α	2n	XVI	69183	57767	SNP	1	A	G	2	G/A	53.2/46.8	108/95	203	G	53.202	108	A	46.798	95	AGGTTGCGATTTTGAACAAA	AAAGTGAAACTTGAAGTTAC	AGGTTGCGATTTTGAACAAA	AAAGTGAAACTTGAAGTTAC
BY4743_10-15	BY4743	WT	a/α	2n	XVI	182994	171569	SNP	1	T	C	2	C/T	51.0/49.0	98/94	192	C	51.0417	98	T	48.9583	94	AGTTTATGCACTCTAAGTTT	TCTTGGTCGTTGTTTTTCTT	AGTTTATGCACTCTAAGTTT	TCTTGGTCGTTGTTTTTCTT
BY4743_10-15	BY4743	WT	a/α	2n	XVI	339492	328067	SNP	1	C	T	2	T/C	53.5/46.5	100/87	187	T	53.4759	100	C	46.5241	87	CACATCATACGGATGAACTA	GGGTGCAATCCCTGACTCAT	CACATCATACGGATGAACTA	GGGTGCAATCCCTGACTCAT
BY4743_10-15	BY4743	WT	a/α	2n	XVI	460090	445861	SNP	1	T	G	2	T/G	53.1/46.9	86/76	162	T	53.0864	86	G	46.9136	76	ATTGAAAAAGGAATACTCTC	GGCGTTCAAAGCCTTGGAAA	ATTGAAAAAGGAATACTCTC	GGCGTTCAAAGCCTTGGAAA
BY4743_10-15	BY4743	WT	a/α	2n	XVI	503385	489155	SNP	1	G	A	2	G/A	52.3/47.7	34/31	65	G	52.3077	34	A	47.6923	31	AACTAATTATTAAGAAAAAA	AAAAAAAAAAAAAAAAAAAA	AACTAATTATTAAGAAAAAA	AAAAAAAAAAAAAAAAAAAA
BY4743_10-15	BY4743	WT	a/α	2n	VIII	556968	548689	DIP	1	-	T	2	-/T	52.4/47.0	566/508	1080	-	52.4074	566	T	47.037	508	GTGTGTGGGTGTGGGTGTGG	GTGTGGGTGTGGTGTGTGTA	GTGTGTGGGTGTGGGTGTGG	TGTGGGTGTGGTGTGTGTAT
BY4743_10-16	BY4743	WT	a/α	2n	II	813161	807394	SNP	1	T	G	1	G	76.5	13	17	G	76.4706	13				GTGGGTGTGGGTGTGGTGTG	GTGGGTGTGGTGTGTGGGTG	GTGGGTGTGGGTGTGGTGTG	GTGGGTGTGGTGTGGGGGTG
BY4743_10-16	BY4743	WT	a/α	2n	III	268780	258471	SNP	1	G	A	2	A/G	53.5/46.5	54/47	101	A	53.4653	54	G	46.5347	47	GTTTCTACGGCCACCAAAAC	GTTGACGGGGTGATCACCGA	GTTTCTACGGCCACCAAAAC	GTTGACGGGGTGATCACCGA
BY4743_10-16	BY4743	WT	a/α	2n	III	278752	268443	SNP	1	T	C	2	C/T	53.1/46.9	60/53	113	C	53.0973	60	T	46.9027	53	TTCCAAATCATACTCCTGCT	GTGTATTAAAGGACATGAAA	TTCCAAATCATACTCCTGCT	GTGTATTAAAGGACATGAAA
BY4743_10-16	BY4743	WT	a/α	2n	IV	902839	889070	SNP	1	T	G	1	G	55.7	78	140	G	55.7143	78				CTTTTAGGTGTAACAATTCC	TCCAATGCACAGTCATAATT	CTTTTAGGTGTAACAATTCC	TCCAATGCACAGTCATAATT
BY4743_10-16	BY4743	WT	a/α	2n	IV	1334925	1308976	SNP	1	G	A	1	A	99.4	159	160	A	99.375	159				CTCCCACCACTGACAAAATC	GATACTACACATTCGCTGAA	CTCCCACCACTGACAAAATC	GATACTACACATTCGCTGAA
BY4743_10-16	BY4743	WT	a/α	2n	VII	124384	124389	SNP	1	A	G	2	A/G	52.2/47.8	94/86	180	A	52.2222	94	G	47.7778	86	CAGAAAGTTCTGAAAAAAAA	AAAAAGAGGACGCTCACAGG	CAGAAAGTTCTGAAAAAAAA	AAAAAGAGGACGCTCACAGG
BY4743_10-16	BY4743	WT	a/α	2n	VII	567432	560845	SNP	1	T	G	2	T/G	50.1/49.9	237/236	473	T	50.1057	237	G	49.8943	236	GCACAGGCGCTACCATGAGA	ATATGTGAATGTTGAGATAA	GCACAGGCGCTACCATGAGA	ATATGTGAATGTTGAGATAA
BY4743_10-16	BY4743	WT	a/α	2n	VII	567440	560853	SNP	1	A	G	2	A/G	50.1/49.9	244/243	487	A	50.1027	244	G	49.8973	243	GCTACCATGAGATATATGTG	ATGTTGAGATAATTGTTGGG	GCTACCATGAGATATATGTG	ATGTTGAGATAATTGTTGGG
BY4743_10-16	BY4743	WT	a/α	2n	VII	567443	560856	SNP	1	G	T	2	G/T	52.2/47.8	250/229	479	G	52.1921	250	T	47.8079	229	ACCATGAGATATATGTGAAT	TTGAGATAATTGTTGGGATT	ACCATGAGATATATGTGAAT	TTGAGATAATTGTTGGGATT
BY4743_10-16	BY4743	WT	a/α	2n	VII	567448	560861	SNP	1	G	T	2	G/T	53.6/46.4	244/211	455	G	53.6264	244	T	46.3736	211	GAGATATATGTGAATGTTGA	ATAATTGTTGGGATTCCATT	GAGATATATGTGAATGTTGA	ATAATTGTTGGGATTCCATT
BY4743_10-16	BY4743	WT	a/α	2n	VII	567449	560862	SNP	1	A	G	2	A/G	52.6/47.4	240/216	456	A	52.6316	240	G	47.3684	216	AGATATATGTGAATGTTGAG	TAATTGTTGGGATTCCATTG	AGATATATGTGAATGTTGAG	TAATTGTTGGGATTCCATTG
BY4743_10-16	BY4743	WT	a/α	2n	VIII	526342	522702	SNP	1	A	T	2	A/T	52.0/47.7	145/133	279	A	51.9713	145	T	47.6703	133	GTCATCAGAACTCCAACAAC	GCTAGCACCATCACAACTAC	GTCATCAGAACTCCAACAAC	GCTAGCACCATCACAACTAC
BY4743_10-16	BY4743	WT	a/α	2n	VIII	526363	522723	SNP	1	C	G	2	C/G	54.3/45.1	176/146	324	C	54.321	176	G	45.0617	146	GCTAGCACCATCACAACTAC	ACCGAGCCATGGACCGGTAC	GCTAGCACCATCACAACTAC	ACCGAGCCATGGACCGGTAC
BY4743_10-16	BY4743	WT	a/α	2n	IX	418391	403298	SNP	1	A	T	2	T/A	51.2/48.8	126/120	246	T	51.2195	126	A	48.7805	120	GATTCCTTTGGGCTAACTCC	TTACATTTTGCTTGCATAAG	GATTCCTTTGGGCTAACTCC	TTACATTTTGCTTGCATAAG
BY4743_10-16	BY4743	WT	a/α	2n	XII	635348	592100	SNP	1	T	A	1	A	96.6	113	117	A	96.5812	113				TATAGTAAAACTAGCTGATT	TGGTTTGTCTAAACAAATAT	TATAGTAAAACTAGCTGATT	TGGTTTGTCTAAACAAATAT
BY4743_10-16	BY4743	WT	a/α	2n	XII	981309	935037	SNP	1	G	T	1	T	60.9	198	325	T	60.9231	198				GTAAATTGGAAGCTGAAACG	CTAACGGATCTTGATTTGAT	GTAAATTGGAAGCTGAAACG	CTAACGGATCTTGATTTG-T
BY4743_10-16	BY4743	WT	a/α	2n	XII	981357	935085	SNP	1	T	C	1	C	61.9	280	452	C	61.9469	280				CCTTAGAAGTAACCGAAGCA	AGGCGCTACCATGTAGAGAA	CCTTAGAAGTAACCGAAGCA	AGGCGCTACCATGTAGAGAA
BY4743_10-16	BY4743	WT	a/α	2n	XIII	374907	362607	SNP	1	A	G	2	A/G	51.4/48.6	18/17	35	A	51.4286	18	G	48.5714	17	GTCAGGGAATTCGGTAGGAG	TTCTGGAGGTAGATCAGGGA	GTCAGGGAATTCGGTAGGAG	TTCTGGAGGTAGATCAGGGA
BY4743_10-16	BY4743	WT	a/α	2n	XIII	754437	739496	SNP	1	G	T	1	T	77.8	133	171	T	77.7778	133				AATGCACTTAGTAAATTGCA	CAGGGTTTAGAGGGGAACGC	AATGCACTTAGTAAATTGCA	CAGGGTTTAGAGGGGAACGC
BY4743_10-16	BY4743	WT	a/α	2n	XIII	774783	759842	SNP	1	T	A	1	A	78	99	127	A	77.9528	99				TCAAGTTGTTGTTTCCGCCG	CGCCTTCACTGGTTTAGTAA	TCAAGTTGTTGTTTCCGCCG	CGCCTTCACTGGTTTAGTAA
BY4743_10-16	BY4743	WT	a/α	2n	XIII	811665	796724	SNP	1	G	C	1	C	72.2	151	209	C	72.2488	151				GGGGCTGAATTTTGGACTGG	GCTGAAGCTTGAACTGGGAC	GGGGCTGAATTTTGGACTGG	GCTGAAGCTTGAACTGGGAC
BY4743_10-16	BY4743	WT	a/α	2n	XIII	826489	811548	SNP	1	A	T	1	T	78.3	184	235	T	78.2979	184				TCTCTGAGTATTTCCTCGAA	AACTGATATGAAAGAAAATT	TCTCTGAGTATTTCCTCGAA	AACTGATATGAAAGAAAATT
BY4743_10-16	BY4743	WT	a/α	2n	XIV	168435	162920	SNP	1	C	A	1	A	68.8	130	189	A	68.7831	130				TGCCCTTTTATATCTCTTAG	GATTTCTTCGCCAACCCTCA	TGCCCTTTTATATCTCTTAG	GATTTCTTCGCCAACCCTCA
BY4743_10-16	BY4743	WT	a/α	2n	XIV	745708	739917	SNP	1	A	T	1	T	67.7	109	161	T	67.7019	109				ACTTGAGAGATATACACAGG	GTCGAAACTGAATTGGACAG	ACTTGAGAGATATACACAGG	GTCGAAACTGAATTGGACAG
BY4743_10-16	BY4743	WT	a/α	2n	XV	557726	554739	SNP	1	C	T	2	C/T	51.5/48.5	86/81	167	C	51.497	86	T	48.503	81	TCTTTGTAGGTTCCGCTTTA	TTTTCCTCGTCAAAGGCCCT	TCTTTGTAGGTTCCGCTTTA	TTTTCCTCGTCAAAGGCCCT
BY4743_10-16	BY4743	WT	a/α	2n	XV	759321	751676	SNP	1	G	A	2	G/A	51.4/48.6	91/86	177	G	51.4124	91	A	48.5876	86	TTATTTCTACGTCAAAATAA	AATAGCATGTCTGTCCTACC	TTATTTCTACGTCAAAATAA	AATAGCATGTCTGTCCTACC
BY4743_10-16	BY4743	WT	a/α	2n	Mito	34103	34104	SNP	1	T	A	1	A	98.1	510	520	A	98.0769	510				TAAATACAAATATAAATATA	AAATATATAAATATAATATA	TAAATACAAATATAAATATA	AAAGAATATAATTTATAATA
BY4743_10-16	BY4743	WT	a/α	2n	Mito	34107	34109	SNP	1	T	A	1	A	73.1	331	453	A	73.0684	331				TACAAATATAAATATATAAA	TATATAAATATAATATAAAT	ACAAATATAAATATAAAAAG	ATATAATTTATAATATAAAT
BY4743_10-16	BY4743	WT	a/α	2n	Mito	34114	34117	SNP	1	A	T	1	T	96.5	278	288	T	96.5278	278				ATAAATATATAAATATATAA	ATATAATATAAATACAAATA	AAATATAAAAAGAATATAAT	TATAATATAAATATATATAT
BY4743_10-16	BY4743	WT	a/α	2n	Mito	34119	34122	SNP	1	A	T	1	T	76.1	118	155	T	76.129	118				TATATAAATATATAAATATA	TATAAATACAAATATAATAT	TAAAAAGAATATAATTTATA	TATAAATATATATAT-ATAT
BY4743_10-16	BY4743	WT	a/α	2n	Mito	34127	34130	SNP	1	A	T	1	T	92.5	123	133	T	92.4812	123				TATATAAATATAATATAAAT	CAAATATAATATATAAATAT	ATATAATTTATAATATAAAT	TATATAT-ATATATATATAT
BY4743_10-16	BY4743	WT	a/α	2n	Mito	34128	34131	Complex SNP	1	C	T	2	T/A	50.2/46.0	120/110	239	T	50.2092	120	A	46.0251	110	ATATAAATATAATATAAATA	AAATATAATATATAAATATA	TATAATTTATAATATAAATA	ATATAT-ATATATATATATT
BY4743_10-16	BY4743	WT	a/α	2n	Mito	34130	34133	SNP	1	A	T	1	T	83.3	40	48	T	83.3333	40				ATAAATATAATATAAATACA	ATATAATATATAAATATAAA	TAATTTATAATATAAATATA	ATAT-ATATATATATATTAA
BY4743_10-16	BY4743	WT	a/α	2n	Mito	34143	34145	SNP	1	A	T	1	T	95.8	207	216	T	95.8333	207				AAATACAAATATAATATATA	ATATAAATATAAATATATAA	AAATATATATAT-ATATATA	ATATTAAATA-AAATATTTA
BY4743_10-16	BY4743	WT	a/α	2n	Mito	34160	34162	SNP	1	A	T	1	T	75.8	25	33	T	75.7576	25				ATAAATATAAATATAAATAT	TAAATATAAGTCCCCGCCCC	TATATATTAAATA-AAATAT	TAAATATAAGTCCCCGCCCC
BY4743_10-16	BY4743	WT	a/α	2n	VII	567429	560842	DIP	1	-	T	2	T/-	50.1/49.7	243/241	485	T	50.1031	243	-	49.6907	241	GAAGCACAGGCGCTACCATG	AGATATATGTGAATGTTGAG	GAAGCACAGGCGCTACCATG	GATATATGTGAATGTTGAGA
BY4743_10-16	BY4743	WT	a/α	2n	VII	567434	560847	DIP	1	T	-	2	T/-	50.1/49.3	247/243	493	T	50.1014	247	-	49.2901	243	ACAGGCGCTACCATGAGATA	ATGTGAATGTTGAGATAATT	ACAGGCGCTACCATGAGATA	ATGTGAATGTTGAGATAATT
BY4743_10-16	BY4743	WT	a/α	2n	XII	563477	522398	DIP	2	AC	--	1	--	74	71	96	--	73.9583	71				TAGAAGATATATATCATATT	ACACACACACACACACACAC	TAGAAGATATATATCATATT	ACACACACACACACACACAC
BY4743_10-16	BY4743	WT	a/α	2n	XII	981328	935056	DIP	1	A	-	1	-	62.6	249	398	-	62.5628	249				GGCTAACGGATCTTGATTTG	TGGGACTTCCTTAGAAGTAA	GTCTAACGGATCTTGATTTG	TGTGGACTTCCTTAGAAGTA
BY4743_10-16	BY4743	WT	a/α	2n	XII	981331	935058	DIP	1	-	T	1	T	62.8	250	398	T	62.8141	250				TAACGGATCTTGATTTGATG	GGACTTCCTTAGAAGTAACC	TAACGGATCTTGATTTG-TG	GGACTTCCTTAGAAGTAACC
BY4743_10-16	BY4743	WT	a/α	2n	Mito	20289	20289	DIP	1	G	-	1	-	92.1	1324	1438	-	92.0723	1324				CCCACCCCCATGCGAAGCAT	GGGGGGGGTATAAGTATGGA	CCCACCCCCATGCGAAGCAT	GGGGGGGGTATAAGTATGGA
BY4743_10-16	BY4743	WT	a/α	2n	Mito	34107	34108	DIP	1	-	G	1	G	71	330	465	G	70.9677	330				TACAAATATAAATATATAAA	TATATAAATATAATATAAAT	TACAAATATAAATATAAAAA	AATATAATTTATAATATAAA
BY4743_10-16	BY4743	WT	a/α	2n	Mito	34114	34116	DIP	1	-	T	1	T	67.7	277	409	T	67.7262	277				ATAAATATATAAATATATAA	ATATAATATAAATACAAATA	TAAATATAAAAAGAATATAA	TTATAATATAAATATATATA
BY4743_10-16	BY4743	WT	a/α	2n	Mito	34135	34138	DIP	1	A	-	1	-	77.5	196	253	-	77.4704	196				TATAATATAAATACAAATAT	ATATATAAATATAAATATAA	TATAATATAAATATATATAT	ATATATATATATTAAATA-A
BY4743_10-16	BY4743	WT	a/α	2n	Mito	34147	34149	DIP	1	-	T	1	T	58.7	128	218	T	58.7156	128				ACAAATATAATATATAAATA	TAAATATAAATATATAAATA	ATATATAT-ATATATATATA	TAAATA-AAATATTTAAATA
BY4743_10-16	BY4743	WT	a/α	2n	Mito	34153	34156	DIP	1	T	-	1	-	69.4	127	183	-	69.3989	127				ATAATATATAAATATAAATA	TAAATATATAAATATAAGTC	T-ATATATATATATTAAATA	AAATATTTAAATATAAGTCC
BY4743_10-17	BY4743	WT	a/α	2n	I	23445	23447	SNP	1	T	C	2	T/C	51.2/48.8	85/81	166	T	51.2048	85	C	48.7952	81	ATAACTAATTATCACCATTA	TTCAAGTTTCAAGTACTGCG	ATAACTAATTATCACCATTA	TTCAAGTTTCAAGTACTGCG
BY4743_10-17	BY4743	WT	a/α	2n	I	72678	72556	SNP	1	C	T	2	T/C	54.3/45.7	102/86	188	T	54.2553	102	C	45.7447	86	TAAGCCAGTTATCTGTGCTA	CCAAATGTTGGAATCCATGA	TAAGCCAGTTATCTGTGCTA	CCAAATGTTGGAATCCATGA
BY4743_10-17	BY4743	WT	a/α	2n	I	178242	175914	SNP	1	A	T	2	T/A	50.5/49.5	92/90	182	T	50.5495	92	A	49.4505	90	GTGCTCAACTCAATGACAAT	AACAATTTAACCATGGCAGG	GTGCTCAACTCAATGACAAT	AACAATTTAACCATGGCAGG
BY4743_10-17	BY4743	WT	a/α	2n	II	197348	195450	SNP	1	T	C	2	C/T	53.2/46.8	101/89	190	C	53.1579	101	T	46.8421	89	TCTAAAAAATGGTAAAACTG	TGCTACTAATCAATATCATA	TCTAAAAAATGGTAAAACTG	TGCTACTAATCAATATCATA
BY4743_10-17	BY4743	WT	a/α	2n	II	564195	560967	SNP	1	C	A	2	A/C	51.7/48.3	76/71	147	A	51.7007	76	C	48.2993	71	CTGATGCTTATGTCTGGAGA	AACAGCTTCACCTTCCTTAC	CTGATGCTTATGTCTGGAGA	AACAGCTTCACCTTCCTTAC
BY4743_10-17	BY4743	WT	a/α	2n	III	15799	15005	SNP	1	C	G	1	G	98.3	119	121	G	98.3471	119				CGAAAAAGTTATTGGATTTT	AAGCACTTTTTAAATTCACA	CGAAAAAGTTATTGGATTTT	AAGCACTTTTTAAATTCACA
BY4743_10-17	BY4743	WT	a/α	2n	IV	230707	228459	SNP	1	C	A	1	A	56.9	78	137	A	56.9343	78				ATGGCACTGCGGGATAGCCC	TGGTTGCGGGATATCAGACC	ATGGCACTGCGGGATAGCCC	TGGTTGCGGGATATCAGACC
BY4743_10-17	BY4743	WT	a/α	2n	IV	542340	532839	SNP	1	G	A	2	G/A	52.3/47.7	68/62	130	G	52.3077	68	A	47.6923	62	TTATGACAGGAAGTCAGGAG	TAGTCACAGTCTCGTATTAA	TTATGACAGGAAGTCAGGAG	TAGTCACAGTCTCGTATTAA
BY4743_10-17	BY4743	WT	a/α	2n	IV	1328693	1301679	SNP	1	A	T	2	A/T	53.3/46.7	80/70	150	A	53.3333	80	T	46.6667	70	CCACCCAAAGGGATTTAAAA	GGACATGAGAAAAATAATTT	CCACCCAAAGGGATTTAAAA	GGACATGAGAAAAATAATTT
BY4743_10-17	BY4743	WT	a/α	2n	IV	1489671	1462657	SNP	1	G	T	2	T/G	51.1/48.9	93/89	182	T	51.0989	93	G	48.9011	89	CCAAAGCGTTGGAAGCAGCA	CACCAGTGGAGATCTTGGTG	CCAAAGCGTTGGAAGCAGCA	CACCAGTGGAGATCTTGGTG
BY4743_10-17	BY4743	WT	a/α	2n	V	177881	176779	SNP	1	C	A	2	A/C	52.6/47.4	101/91	192	A	52.6042	101	C	47.3958	91	ACAGGATTCTGTCATTCTAG	GTCTTCTAAGGCAGTCACAA	ACAGGATTCTGTCATTCTAG	GTCTTCTAAGGCAGTCACAA
BY4743_10-17	BY4743	WT	a/α	2n	VII	80903	80908	SNP	1	T	C	2	C/T	51.5/48.5	84/79	163	C	51.5337	84	T	48.4663	79	TATTATTCTGTCTGTTTTTT	TACCTAAAGTAGTTGTAGAG	TATTATTCTGTCTGTTTTTT	TACCTAAAGTAGTTGTAGAG
BY4743_10-17	BY4743	WT	a/α	2n	VII	287524	287529	SNP	1	A	T	1	T	60.6	114	188	T	60.6383	114				GTATCTTTAAAACGGCTCCT	GTTATCGTCAGTTTTGATAA	GTATCTTTAAAACGGCTCCT	GTTATCGTCAGTTTTGATAA
BY4743_10-17	BY4743	WT	a/α	2n	VII	292345	292350	SNP	1	C	T	2	C/T	50.8/49.2	95/92	187	C	50.8021	95	T	49.1979	92	TCGAATTAGTAGACAAATTA	AGTTAGATGGATTAAAAGAT	TCGAATTAGTAGACAAATTA	AGTTAGATGGATTAAAAGAT
BY4743_10-17	BY4743	WT	a/α	2n	VII	1048713	1034107	SNP	1	T	C	2	T/C	50.3/49.7	73/72	145	T	50.3448	73	C	49.6552	72	AACAGAGAAAAAGAAGATTA	CAAAGCCTTAATTTAAAGTT	AACAGAGAAAAAGAAGATTA	CAAAGCCTTAATTTAAAGTT
BY4743_10-17	BY4743	WT	a/α	2n	IX	23944	8319	SNP	1	A	G	1	G	99	203	205	G	99.0244	203				GTTGTGTATGATTTGGAAGA	ACGGTTTCAGTTACAACAGC	GTTGTGTATGATTTGGAAGA	ACGGTTTCAGTTACAACAGC
BY4743_10-17	BY4743	WT	a/α	2n	IX	67752	52129	SNP	1	G	A	2	A/G	54.8/45.2	108/89	197	A	54.8223	108	G	45.1777	89	CATAGCTTCATGGCTCACAT	CAATTGTTTTTTTAGTGCAT	CATAGCTTCATGGCTCACAT	CAATTGTTTTTTTAGTGCAT
BY4743_10-17	BY4743	WT	a/α	2n	X	40663	26996	SNP	1	C	T	2	C/T	52.5/47.5	106/96	202	C	52.4752	106	T	47.5248	96	AAAAGTACTCCAAATGCGCC	AATAGTCTCTATTAAAACCT	AAAAGTACTCCAAATGCGCC	AATAGTCTCTATTAAAACCT
BY4743_10-17	BY4743	WT	a/α	2n	X	395403	381736	SNP	1	T	C	2	T/C	50.8/49.2	98/95	193	T	50.7772	98	C	49.2228	95	AAGGAGGCTATCGGTAGACT	CTAACCCATATAGCATCACA	AAGGAGGCTATCGGTAGACT	CTAACCCATATAGCATCACA
BY4743_10-17	BY4743	WT	a/α	2n	XI	379724	379728	SNP	1	A	T	2	T/A	51.4/48.6	76/72	148	T	51.3514	76	A	48.6486	72	GCATCTGCTTAACACGCAGA	CGTCCCCAGTTCGATCCTGG	GCATCTGCTTAACACGCAGA	CGTCCCCAGTTCGATCCTGG
BY4743_10-17	BY4743	WT	a/α	2n	XI	465292	465294	SNP	1	C	A	1	A	58.1	61	105	A	58.0952	61				ACATTATTACGTATATACTG	TTTATTATCGGAAAGTAGCA	ACATTATTACGTATATACTG	TTTATTATCGGAAAGTAGCA
BY4743_10-17	BY4743	WT	a/α	2n	XII	369934	360905	SNP	1	G	A	2	G/A	50.9/49.1	82/79	161	G	50.9317	82	A	49.0683	79	TCGACGGTGACGGTAGCGGT	GAAACCAAAGCTGGGGAGAC	TCGACGGTGACGGTAGCGGT	GAAACCAAAGCTGGGGAGAC
BY4743_10-17	BY4743	WT	a/α	2n	XII	968600	920956	SNP	1	A	T	1	T	97.1	136	140	T	97.1429	136				GTATTCCCTCTATGCTGGAG	CAATGACCAATCACTGTAAG	GTATTCCCTCTATGCTGGAG	CAATGACCAATCACTGTAAG
BY4743_10-17	BY4743	WT	a/α	2n	XIV	106537	101014	SNP	1	A	G	1	G	99.4	153	154	G	99.3506	153				CATTCATTTTGACAGTAGGA	ACTGATTGATACTCGTAAAC	CATTCATTTTGACAGTAGGA	ACTGATTGATACTCGTAAAC
BY4743_10-17	BY4743	WT	a/α	2n	XIV	184840	179317	SNP	1	G	T	2	T/G	52.8/47.2	85/76	161	T	52.795	85	G	47.205	76	TTGCCTTGGATGATAGGAAT	GACAATCTGCCTTGATCAAA	TTGCCTTGGATGATAGGAAT	GACAATCTGCCTTGATCAAA
BY4743_10-17	BY4743	WT	a/α	2n	XIV	235633	230110	SNP	1	T	C	1	C	100	170	170	C	100	170				AAGAAGTACTTAAAATATAT	GAAGATTTTGTTGGCGTTCC	AAGAAGTACTTAAAATATAT	GAAGATTTTGTTGGCGTTCC
BY4743_10-17	BY4743	WT	a/α	2n	XIV	250502	244979	SNP	1	C	A	2	C/A	50.3/49.7	83/82	165	C	50.303	83	A	49.697	82	AAATACAAATTGTTTCATCA	GGTGACTATATCAAGAACTT	AAATACAAATTGTTTCATCA	GGTGACTATATCAAGAACTT
BY4743_10-17	BY4743	WT	a/α	2n	XIV	455760	450235	SNP	1	A	G	1	G	98.9	172	174	G	98.8506	172				TCAAATTTCGAGTGGAGTGG	TGAAAGCCACATTCTGGATA	TCAAATTTCGAGTGGAGTGG	TGAAAGCCACATTCTGGATA
BY4743_10-17	BY4743	WT	a/α	2n	XIV	569915	563987	SNP	1	G	T	2	G/T	51.4/48.6	71/67	138	G	51.4493	71	T	48.5507	67	CCCCGCGTTATTAGCACGGT	CCTTAACCAACTGGGCCAAG	CCCCGCGTTATTAGCACGGT	CCTTAACCAACTGGGCCAAG
BY4743_10-17	BY4743	WT	a/α	2n	XIV	572080	566152	SNP	1	A	T	2	T/A	52.4/47.6	77/70	147	T	52.381	77	A	47.619	70	ATCTATTCCACCTTCTAATG	CTGTACTACCCGCAACCATA	ATCTATTCCACCTTCTAATG	CTGTACTACCCGCAACCATA
BY4743_10-17	BY4743	WT	a/α	2n	XIV	778555	772627	SNP	1	T	C	2	C/T	50.3/49.7	91/90	181	C	50.2762	91	T	49.7238	90	AACATTTTTTAACGGCAGGA	CGACTTGGTATAATCCTTTG	AACATTTTTTAACGGCAGGA	CGACTTGGTATAATCCTTTG
BY4743_10-17	BY4743	WT	a/α	2n	XV	182806	179712	SNP	1	C	A	2	A/C	50.7/49.3	106/103	209	A	50.7177	106	C	49.2823	103	GGTTTGACGGAAACGGAAAG	AACAATATTTCCGATATGGA	GGTTTGACGGAAACGGAAAG	AACAATATTTCCGATATGGA
BY4743_10-17	BY4743	WT	a/α	2n	XV	594422	591159	SNP	1	G	C	2	C/G	52.3/47.7	91/83	174	C	52.2989	91	G	47.7011	83	TTCTAACCACTGAACCACTT	CGCGTTTCAATCAATTTGGG	TTCTAACCACTGAACCACTT	CGCGTTTCAATCAATTTGGG
BY4743_10-17	BY4743	WT	a/α	2n	XV	909649	901486	SNP	1	G	T	1	T	61	100	164	T	60.9756	100				ATTATCATTATAATTCATTT	ACCAATTGACCGATATCATG	ATTATCATTATAATTCATTT	ACCAATTGACCGATATCATG
BY4743_10-17	BY4743	WT	a/α	2n	XV	1042209	1033349	SNP	1	T	C	1	C	62.8	118	188	C	62.766	118				GAGTATTCGTTGACGATTTG	TCCAAGGACTTGAAGTTGAC	GAGTATTCGTTGACGATTTG	TCCAAGGACTTGAAGTTGAC
BY4743_10-17	BY4743	WT	a/α	2n	XVI	121808	110086	SNP	1	C	T	2	T/C	53.6/46.4	112/97	209	T	53.5885	112	C	46.4115	97	GATCTAAACTCTTTCCTTGA	GACCAACCAAAGGACCCAAA	GATCTAAACTCTTTCCTTGA	GACCAACCAAAGGACCCAAA
BY4743_10-17	BY4743	WT	a/α	2n	XVI	290319	278594	SNP	1	T	A	2	A/T	52.3/47.7	79/72	151	A	52.3179	79	T	47.6821	72	AGTGGCGAATATTTGATTAT	CAAAAACTTGATTTCTTGAA	AGTGGCGAATATTTGATTAT	CAAAAACTTGATTTCTTGAA
BY4743_10-17	BY4743	WT	a/α	2n	XVI	813346	794023	SNP	1	A	T	2	T/A	51.5/48.5	102/96	198	T	51.5152	102	A	48.4848	96	CATTAATGCCCTTGTTCAGA	ATCTAGATAAATACTCCATA	CATTAATGCCCTTGTTCAGA	ATCTAGATAAATACTCCATA
BY4743_10-17	BY4743	WT	a/α	2n	XVI	819581	800258	SNP	1	G	T	2	T/G	52.9/47.1	91/81	172	T	52.907	91	G	47.093	81	CTAATAACGCGGGGATCAGC	GTTCGATCCCGCTAGAGACC	CTAATAACGCGGGGATCAGC	GTTCGATCCCGCTAGAGACC
BY4743_10-17	BY4743	WT	a/α	2n	Mito	44128	44126	SNP	1	T	A	1	A	98.6	479	486	A	98.5597	479				GAATCTTATTATTTTCTTTA	TTAAATTTATAAAAATATAA	GAATCTTATTATTTTCTTTA	TTAATTATATAATATAATAT
BY4743_10-17	BY4743	WT	a/α	2n	Mito	44133	44131	SNP	1	A	T	1	T	95.3	24424	25638	T	95.2648	24424				TTATTATTTTCTTTATTTAA	TTTATAAAAATATAAAGTCC	TTATTATTTTCTTTAATTAA	TATATAATATAATATAAAGT
BY4743_10-17	BY4743	WT	a/α	2n	Mito	44135	44133	SNP	1	T	A	1	A	95.3	24745	25974	A	95.2683	24745				ATTATTTTCTTTATTTAAAT	TTATAAAAATATAAAGTCCC	ATTATTTTCTTTAATTAATT	TATAATATAATATAAAGTCC
BY4743_10-17	BY4743	WT	a/α	2n	IV	1122643	1099750	DIP	1	-	T	2	-/T	53.8/46.2	85/73	158	-	53.7975	85	T	46.2025	73	TTACCGAAGCCATTCCTATA	TTTTTTACCTAAGATGATCT	TTACCGAAGCCATTCCTATA	TTTTTACCTAAGATGATCTG
BY4743_10-17	BY4743	WT	a/α	2n	XIII	662219	646919	DIP	1	A	-	2	A/-	52.9/45.9	83/72	157	A	52.8662	83	-	45.8599	72	GTGACGAAGACTCGAAAATT	AAAAAAAAGATACTGCAGAA	GTGACGAAGACTCGAAAATT	AAAAAAAAGATACTGCAGAA
BY4743_10-17	BY4743	WT	a/α	2n	XV	500269	497175	DIP	1	-	T	2	-/T	51.9/48.1	83/77	160	-	51.875	83	T	48.125	77	GGTTGAGCAGATTGATTCCC	TTTTTTGGCATAAAGAAGGT	GGTTGAGCAGATTGATTCCC	TTTTTGGCATAAAGAAGGTT
BY4743_10-17	BY4743	WT	a/α	2n	Mito	44141	44139	DIP	1	-	T	1	T	99.4	28177	28359	T	99.3582	28177				TTCTTTATTTAAATTTATAA	AAATATAAAGTCCCCGCCCC	TTCTTTAATTAATTATATAA	ATAATATAAAGTCCCCGCCC
BY4743_10-17	BY4743	WT	a/α	2n	Mito	44142	44141	DIP	1	-	T	1	T	99.3	28158	28368	T	99.2597	28158				TCTTTATTTAAATTTATAAA	AATATAAAGTCCCCGCCCCC	CTTTAATTAATTATATAATA	AATATAAAGTCCCCGCCCCC
BY4743_10-18	BY4743	WT	a/α	2n	I	188881	186775	SNP	1	G	C	2	G/C	52.2/47.8	168/154	322	G	52.1739	168	C	47.8261	154	ATAATCAGCACTAACTGGCC	GAAAACGGCCGAAGGAAGCC	ATAATCAGCACTAACTGGCC	GAAAACGGCCGAAGGAAGCC
BY4743_10-18	BY4743	WT	a/α	2n	I	205901	203668	SNP	1	A	G	2	A/G	53.7/46.3	94/81	175	A	53.7143	94	G	46.2857	81	TTTACTTCTACATCTACTGA	ATGACCACCATTACTGGAAC	TTTACCTCTACATCTACTGA	ATGACCACCATTACTGGAAC
BY4743_10-18	BY4743	WT	a/α	2n	III	81039	80535	SNP	1	T	C	2	C/T	51.9/48.1	108/100	208	C	51.9231	108	T	48.0769	100	AGGCCTATTTCGAGACTGGA	CCCGGATTAACGCCTGTTAC	AGGCCTATTTCGAGACTGGA	CCCGGATTAACGCCTGTTAC
BY4743_10-18	BY4743	WT	a/α	2n	IV	152689	150534	SNP	1	A	T	1	T	55.6	89	160	T	55.625	89				TTGATAGCAGATCTCATAGT	TCACCGTTTTCTTGAACAGC	TTGATAGCAGATCTCATAGT	TCACCGTTTTCTTGAACAGC
BY4743_10-18	BY4743	WT	a/α	2n	IV	167261	165106	SNP	1	G	A	1	A	56.3	94	167	A	56.2874	94				AGTAATCTGCGCATGTAATT	ATGAACAATGACGTTAAAAG	AGTAATCTGCGCATGTAATT	ATGAACAATGACGTTAAAAG
BY4743_10-18	BY4743	WT	a/α	2n	IV	168815	166660	SNP	1	A	G	1	G	63.3	88	139	G	63.3094	88				TACTAGCCACAGGAACAGGT	TTGATACATTCGGAAATGTA	TACTAGCCACAGGAACAGGT	TTGATACATTCGGAAATGTA
BY4743_10-18	BY4743	WT	a/α	2n	IV	210152	207997	SNP	1	G	A	2	G/A	52.4/47.6	76/69	145	G	52.4138	76	A	47.5862	69	TTTTACATAAAGTCCAAATT	CAGCAAACCTTTTTTTACTG	TTTTACATAAAGTCCAAATT	CAGCAAACCTTTTTTTACTG
BY4743_10-18	BY4743	WT	a/α	2n	IV	478663	476511	SNP	1	A	T	2	T/A	50.8/49.2	64/62	126	T	50.7937	64	A	49.2063	62	AAGATTGAATTCATAGTCTC	TTGATCTCCTGCAATACTAT	AAGATTGAATTCATAGTCTC	TTGATCTCCTGCAATACTAT
BY4743_10-18	BY4743	WT	a/α	2n	IV	516686	514534	SNP	1	G	C	2	C/G	49.7/49.7	77/77	155	C	49.6774	77	G	49.6774	77	TAATTGAATTGGTCCAATTT	GATTGCTTGTCTTGTAATAT	TAGTCGAACTGGTCCAATTT	GATTGCTTGTCTTGTAATAT
BY4743_10-18	BY4743	WT	a/α	2n	IV	516688	514536	SNP	1	A	T	2	T/A	50.7/49.3	74/72	146	T	50.6849	74	A	49.3151	72	ATTGAATTGGTCCAATTTGG	TTGCTTGTCTTGTAATATAA	GTCGAACTGGTCCAATTTGG	TTGCTTGTCTTGTAATATAA
BY4743_10-18	BY4743	WT	a/α	2n	IV	1079564	1062571	SNP	1	T	C	2	C/T	52.1/47.9	76/70	146	C	52.0548	76	T	47.9452	70	GAGATCGAACGCGCGACTGA	AGTCTTGATGTCTTATTTTC	GAGATCGAACGCGCGACTGA	AGTCTTGATGTCTTATTTTC
BY4743_10-18	BY4743	WT	a/α	2n	IV	1168755	1146002	SNP	1	C	T	2	C/T	54.2/45.8	71/60	131	C	54.1985	71	T	45.8015	60	TTCTACAGATTTCAAATTAT	AAACGAATACAAAAGAATTC	TTCTACAGATTTCAAATTAT	AAACGAATACAAAAGAATTC
BY4743_10-18	BY4743	WT	a/α	2n	IV	1392309	1366611	SNP	1	T	C	2	T/C	52.5/47.5	96/87	183	T	52.459	96	C	47.541	87	CCAAAAATTCCCATCATATT	CCCTTAAAAAGACCGCAAAT	CCAAAAATTCCCATCATATT	CCCTTAAAAAGACCGCAAAT
BY4743_10-18	BY4743	WT	a/α	2n	IV	1413221	1387523	SNP	1	C	A	1	A	99.5	181	182	A	99.4505	181				CCTGGAGCTGCTGGGCTAAT	AAAAGAATGTTAATCGTTAA	CCTGGAGCTGCTGGGCTAAT	AAAAGAATGTTAATCGTTAA
BY4743_10-18	BY4743	WT	a/α	2n	IV	1488212	1462514	SNP	1	T	C	2	T/C	52.5/47.5	114/103	217	T	52.5346	114	C	47.4654	103	TTATTTTTTTAACTGGAAAG	TCCTGAGATTGCTTTCATAA	TTATTTTTTTAACTGGAAAG	TCCTGAGATTGCTTTCATAA
BY4743_10-18	BY4743	WT	a/α	2n	VI	4700	4432	SNP	1	A	C	1	C	76.3	1231	1613	C	76.3174	1231				ATATACCCACACACCCACAC	CACCACACCCACACACCCAC	ATATACCCACACA-CCACAC	CA-CACACAC-CACACCCAC
BY4743_10-18	BY4743	WT	a/α	2n	VI	4709	4440	SNP	1	C	A	1	A	68	1060	1558	A	68.0359	1060				CACACCCACACACACCACAC	CCACACACCCACACCCACAC	CACA-CCACACCCA-CACAC	C-CACACCCACACCCACACA
BY4743_10-18	BY4743	WT	a/α	2n	VIII	158778	156756	SNP	1	C	A	2	C/A	51.4/48.6	71/67	138	C	51.4493	71	A	48.5507	67	TTCATCGATTTCATACTCTG	CGACAGCTTCTGTTCTTGCA	TTCATCGATTTCATACTCTG	CGACAGCTTCTGTTCTTGCA
BY4743_10-18	BY4743	WT	a/α	2n	VIII	496283	492818	SNP	1	T	A	2	T/A	50.7/49.3	116/113	229	T	50.655	116	A	49.345	113	ATTTACGAATGAAAATAGTG	AGAGGTATGAACAAGACTAA	ATTTACGAATGAAAATAGTG	AGAGGTATGAACAAGACTAA
BY4743_10-18	BY4743	WT	a/α	2n	X	293127	279675	SNP	1	A	G	2	G/A	53.9/46.1	76/65	141	G	53.9007	76	A	46.0993	65	GTGCTCGAGGTAGGGTCGGA	GAAGTGGTACTGGACGATGT	GTGCTCGAGGTAGGGTCGGA	GAAGTGGTACTGGACGATGT
BY4743_10-18	BY4743	WT	a/α	2n	X	499679	480983	SNP	1	A	G	2	G/A	52.8/47.2	86/77	163	G	52.7607	86	A	47.2393	77	CAGAAAAGAGAGGTATCAAT	TATAGGTTGATGGTAGGAGG	CAGAAAAGAGAGGTATCAAT	TATAGGTTGATGGTAGGAGG
BY4743_10-18	BY4743	WT	a/α	2n	XII	37685	31553	SNP	1	C	A	1	A	64.9	161	248	A	64.9194	161				CTAGTATCTCGGATTTATAG	CGTTAAGAAAAGAAGGATTT	CTAGTATCTCGGATTTATAG	CGTTAAGAAAAGAAGGATTT
BY4743_10-18	BY4743	WT	a/α	2n	XII	899035	854671	SNP	1	A	C	1	C	99.6	222	223	C	99.5516	222				TTCCGTACCCTAGATTTCTT	CTTTCGAAATACATTACCCG	TTCCGTACCCTAGATTTCTT	CTTTCGAAATACATTACCCG
BY4743_10-18	BY4743	WT	a/α	2n	XII	1067170	1021445	SNP	1	A	C	1	C	100	160	160	C	100	160				CGAGAAGTTTTGTTCAGAGA	CCGAAGCGAGGAATTGACGA	CGAGAAGTTTTGTTCAGAGA	CCGAAGCGAGGAATTGACGA
BY4743_10-18	BY4743	WT	a/α	2n	XIII	586664	572284	SNP	1	G	A	1	A	59.1	110	186	A	59.1398	110				CCCAGGATCGAACTGGGGAC	TTCTGCGTGTTAAGCAGATG	CCCAGGATCGAACTGGGGAC	TTCTGCGTGTTAAGCAGATG
BY4743_10-18	BY4743	WT	a/α	2n	XIV	38967	33745	SNP	1	G	T	2	T/G	53.2/46.8	101/89	190	T	53.1579	101	G	46.8421	89	CACTAGTACAAATGTAACTG	GCCCAATGTTATTGCAAACC	CACTAGTACAAATGTAACTG	GCCCAATGTTATTGCAAACC
BY4743_10-18	BY4743	WT	a/α	2n	XIV	438781	433437	SNP	1	C	T	2	T/C	50.9/49.1	81/78	159	T	50.9434	81	C	49.0566	78	TCCTATGTCTTCCCATACCA	AGCACACTAGCAAGGGATAA	TCCTATGTCTTCCCATACCA	AGCACACTAGCAAGGGATAA
BY4743_10-18	BY4743	WT	a/α	2n	XIV	520705	515362	SNP	1	T	C	2	T/C	53.1/46.9	34/30	64	T	53.125	34	C	46.875	30	CAGCACGGACAACGATTCCA	CAGTAAATCAACTACTGAAC	CAGCACGGACAACGATTCCA	CAGTAAATCAACTACTGAAC
BY4743_10-18	BY4743	WT	a/α	2n	XV	36937	36934	SNP	1	T	A	1	A	99.6	236	237	A	99.5781	236				AATGTATTGTCCTTAGTTGG	CAAATGGAAAGATACCTGCA	AATGTATTGTCCTTAGTTGG	CAAATGGAAAGATACCTGCA
BY4743_10-18	BY4743	WT	a/α	2n	XVI	468695	453811	SNP	1	A	C	1	C	97	159	164	C	96.9512	159				AGATATGACGGATACATTAC	AATGGTAGCAGTTGCGAAAG	AGATATGACGGATACATTAC	AATGGTAGCAGTTGCGAAAG
BY4743_10-18	BY4743	WT	a/α	2n	XVI	601894	587009	SNP	1	T	C	2	C/T	55.0/45.0	77/63	140	C	55	77	T	45	63	ATTTTCATGAAATCTTCAAT	GTTAAGTCAGAACGCATCGT	ATTTTCATGAAATCTTCAAT	GTTAAGTCAGAACGCATCGT
BY4743_10-18	BY4743	WT	a/α	2n	XVI	905304	881519	SNP	1	A	T	1	T	100	195	195	T	100	195				AGATGTTGGGGGAGAGATGT	TTCATATCGCTAAGAGGTAT	AGATGTTGGGGGAGAGATGT	TTCATATCGCTAAGAGGTAT
BY4743_10-18	BY4743	WT	a/α	2n	XVI	943050	919265	SNP	1	C	A	1	A	72.9	393	539	A	72.9128	393				CCATGGAAATTGAAAACGAA	GTACGTACCGACTACTTTAT	CCATGGAAATTGAAAACGAA	GTACGTACCGACTACTTTAT
BY4743_10-18	BY4743	WT	a/α	2n	III	316535	306444	DIP	1	-	T	2	T/-	52.2/46.7	151/135	289	T	52.2491	151	-	46.7128	135	AGGGTAGTGTGTGGGTGTGG	GTGTGTGGGTGTGGTGTGTG	AGGGTAGTGTGTGGGTGTGG	GTGTGTGGGTGTGGTGTGTG
BY4743_10-18	BY4743	WT	a/α	2n	VI	4693	4426	DIP	1	C	-	1	-	73.7	1238	1680	-	73.6905	1238				GACATATATATACCCACACA	CCCACACACACCACACCCAC	GACATATATATACCCACACA	CCACACCCA-CACACAC-CA
BY4743_10-18	BY4743	WT	a/α	2n	VI	4703	4435	DIP	1	C	-	1	-	68.6	1212	1766	-	68.6297	1212				TACCCACACACCCACACACA	CCACACCCACACACCCACAC	TACCCACACA-CCACACCCA	CACACAC-CACACCCACACC
BY4743_10-18	BY4743	WT	a/α	2n	VI	4711	4442	DIP	1	A	-	1	-	66.4	1213	1828	-	66.3567	1213				CACCCACACACACCACACCC	ACACACCCACACCCACACAC	CA-CCACACCCA-CACACAC	CACACCCACACCCACACACC
BY4743_10-18	BY4743	WT	a/α	2n	VIII	94	96	DIP	1	A	-	1	-	55.9	904	1616	-	55.9406	904				CCGGCTTTCTGACCGAAATT	AAAAAAAAAAAAATGAAAAT	CCGGCTTTCTGACCGAAATT	AAAAAAAAAAAATGAAAATG
BY4743_10-19	BY4743	WT	a/α	2n	I	19389	19389	SNP	1	T	C	1	C	95.5	106	111	C	95.4955	106				TGCTCCACATAATACGTGGG	CAGACATAAAGGTAGAATAC	TGCTCCACATAATACGTGGG	CAGACATAAAGGTAGAATAC
BY4743_10-19	BY4743	WT	a/α	2n	I	21336	21338	SNP	1	A	T	1	T	98.9	93	94	T	98.9362	93				AAGTACAAGCTCATTTCCAA	AATTCAGTTTGCCTGTAACA	AAGTACAAGCTCATTTCCAA	AATTCAGTTTGCCTGTAACA
BY4743_10-19	BY4743	WT	a/α	2n	I	72932	72767	SNP	1	G	A	1	A	97	97	100	A	97	97				CCTCCACCACCGAAACCGTC	CTGCCTCCGCTGTCGCTGCT	CCTCCACCACCGAAACCGTC	CTGCCTCCGCTGTCGCTGCT
BY4743_10-19	BY4743	WT	a/α	2n	IV	21629	18675	SNP	1	C	G	2	C/G	51.1/48.9	92/88	180	C	51.1111	92	G	48.8889	88	GAAGTACGTTAACGCTAACA	AAGGCTTGACAACTTTCATG	GAAGTACGTTAACGCTAACA	AAGGCTTGACAACTTTCATG
BY4743_10-19	BY4743	WT	a/α	2n	IV	34822	31868	SNP	1	C	A	2	C/A	51.9/48.1	80/74	154	C	51.9481	80	A	48.0519	74	TCCATGAAGTGCGTAAAACA	CAAAACGTTTTCCATTCTTC	TCCATGAAGTGCGTAAAACA	CAAAACGTTTTCCATTCTTC
BY4743_10-19	BY4743	WT	a/α	2n	IV	45629	42675	SNP	1	T	G	2	G/T	52.0/47.4	79/72	152	G	51.9737	79	T	47.3684	72	TTCTGAAGAAATTGAAAAGA	GGTTAACCAAGCTGAAGAGT	TTCTGAAGAAATTGAAAAGA	GGTTAACCAAGCTGAAGAGT
BY4743_10-19	BY4743	WT	a/α	2n	IV	48720	45766	SNP	1	A	T	2	T/A	54.4/45.0	87/72	160	T	54.375	87	A	45	72	CAACTGCATCAATTTCCATG	GACACACACGTCTACCATGT	CAACTGCATCAATTTCCATG	GACACACACGTCTACCATGT
BY4743_10-19	BY4743	WT	a/α	2n	IV	167354	164400	SNP	1	T	G	2	G/T	51.0/49.0	77/74	151	G	50.9934	77	T	49.0066	74	GATGCAAACGCATGGCTTAT	GCAGCTAAATTTCACTTTCA	GATGCAAACGCATGGCTTAT	GCAGCTAAATTTCACTTTCA
BY4743_10-19	BY4743	WT	a/α	2n	IV	187233	184279	SNP	1	G	A	2	A/G	50.4/49.6	57/56	113	A	50.4425	57	G	49.5575	56	GGACGGATTAGGTTACGTTT	CAAGTATGCTATGTTTAACA	GGACGGATTAGGTTACGTTT	CAAGTATGCTATGTTTAACA
BY4743_10-19	BY4743	WT	a/α	2n	IV	219366	216412	SNP	1	G	C	2	C/G	53.8/46.2	70/60	130	C	53.8462	70	G	46.1538	60	AAAGAATCAAAGTAATACAA	CAGCCTGAAGAATGGAAGTT	AAAGAATCAAAGTAATACAA	CAGCCTGAAGAATGGAAGTT
BY4743_10-19	BY4743	WT	a/α	2n	IV	222263	219309	SNP	1	G	C	2	C/G	53.2/46.8	66/58	124	C	53.2258	66	G	46.7742	58	TTGGCTTTCATATAGTGGAA	AAATTCTAAGCTACAACACA	TTGGCTTTCATATAGTGGAA	AAATTCTAAGCTACAACACA
BY4743_10-19	BY4743	WT	a/α	2n	IV	370090	367138	SNP	1	A	T	2	T/A	50.5/49.5	56/55	111	T	50.4505	56	A	49.5495	55	GAAAGTCAAGTACCCGGCAA	GATAACTTTGGTCAGAGGAA	GAAAGTCAAGTACCCGGCAA	GATAACTTTGGTCAGAGGAA
BY4743_10-19	BY4743	WT	a/α	2n	IV	624774	614347	SNP	1	T	C	2	T/C	54.6/45.4	65/54	119	T	54.6218	65	C	45.3782	54	CAGTCTATATAAAATATGCA	ATCATGTGGTTACATAAGAA	CAGTCTATATAAAATATGCA	ATCATGTGGTTACATAAGAA
BY4743_10-19	BY4743	WT	a/α	2n	IV	637323	626896	SNP	1	G	A	2	G/A	53.8/46.2	56/48	104	G	53.8462	56	A	46.1538	48	AGGCTCACCTCCTGCGGAAA	TTTAAAGACTATACAACTAG	AGGCTCACCTCCTGCGGAAA	TTTAAAGACTATACAACTAG
BY4743_10-19	BY4743	WT	a/α	2n	IV	691020	677001	SNP	1	T	C	2	C/T	51.6/48.4	63/59	122	C	51.6393	63	T	48.3607	59	TCTAAATAGGTAAAATGTTC	TCAGCCAAGTTTTGAGATCT	TCTAAATAGGTAAAATGTTC	TCAGCCAAGTTTTGAGATCT
BY4743_10-19	BY4743	WT	a/α	2n	IV	774871	760852	SNP	1	A	G	1	G	97.6	120	123	G	97.561	120				GTGAAGAACTGATAAAGCTA	TCACTGGTATTTCTCTAAAT	GTGAAGAACTGATAAAGCTA	TCACTGGTATTTCTCTAAAT
BY4743_10-19	BY4743	WT	a/α	2n	IV	1162300	1136436	SNP	1	A	C	1	C	99.1	115	116	C	99.1379	115				TTGGTGTCTGAGTAAGCTAA	TTTTCCCAAATTTGATGCCA	TTGGTGTCTGAGTAAGCTAA	TTTTCCCAAATTTGATGCCA
BY4743_10-19	BY4743	WT	a/α	2n	IV	1302468	1273005	SNP	1	G	A	1	A	98	144	147	A	97.9592	144				ATACCACTCATAACTAAAAA	GCTATCCTTCTTTGCATGTA	ATACCACTCATAACTAAAAA	GCTATCCTTCTTTGCATGTA
BY4743_10-19	BY4743	WT	a/α	2n	IV	1502391	1472922	SNP	1	G	C	1	C	97.7	171	175	C	97.7143	171				GTACATGCCCCTTATGCCAA	CTTTTTGATTTTCAGGCTAG	GTACATGCCCCTTATGCCAA	CTTTTTTATTTTCAGGCTAG
BY4743_10-19	BY4743	WT	a/α	2n	IV	1502398	1472929	SNP	1	G	T	1	T	97.7	169	173	T	97.6879	169				CCCCTTATGCCAAGCTTTTT	ATTTTCAGGCTAGGAATGAG	CCCCTTATGCCAACCTTTTT	ATTTTCAGGCTAGGAATGAG
BY4743_10-19	BY4743	WT	a/α	2n	V	32255	32254	SNP	1	T	A	2	A/T	50.5/49.5	98/96	194	A	50.5155	98	T	49.4845	96	GGAGCCAACTTGTTCTTTGA	AGACCAAATAAAATACGGGA	GGAGCCAACTTGTTCTTTGA	AGACCAAATAAAATACGGGA
BY4743_10-19	BY4743	WT	a/α	2n	V	441992	440895	SNP	1	G	C	2	G/C	51.3/48.7	79/75	154	G	51.2987	79	C	48.7013	75	TATTCCAATTGTGCTAGGCT	TAATGGCTTTCTGGTGGGAT	TATTCCAATTGTGCTAGGCT	TAATGGCTTTCTGGTGGGAT
BY4743_10-19	BY4743	WT	a/α	2n	VI	10691	10288	SNP	1	A	G	2	G/A	54.3/45.7	88/74	162	G	54.321	88	A	45.679	74	TGTTGTGAAATATAAATCAA	CCTGCACAAGTACCCCAGGT	TGTTGTGAAATATAAATCAA	CCTGCACAAGTACCCCAGGT
BY4743_10-19	BY4743	WT	a/α	2n	VI	31391	30988	SNP	1	C	A	2	A/C	50.6/49.4	90/88	178	A	50.5618	90	C	49.4382	88	AACGTCACCGATCTCTATTT	TTTTTTAGGTTATTAAATTT	AACGTCACCGATCTCTATTT	TTTTTTAGGTTATTAAATTT
BY4743_10-19	BY4743	WT	a/α	2n	VI	80817	80414	SNP	1	C	A	2	C/A	51.4/48.6	93/88	181	C	51.3812	93	A	48.6188	88	ACATGCTGTATTGAGTAATG	ACTATATTTATTAAGACTCA	ACATGCTGTATTGAGTAATG	ACTATATTTATTAAGACTCA
BY4743_10-19	BY4743	WT	a/α	2n	VI	150210	144914	SNP	1	C	G	2	C/G	50.6/49.4	87/85	172	C	50.5814	87	G	49.4186	85	AAGAACAAAGCTAGCAAGGA	TATACTAAAGCCCACTATTT	AAGAACAAAGCTAGCAAGGA	TATACTAAAGCCCACTATTT
BY4743_10-19	BY4743	WT	a/α	2n	VII	3418	3422	SNP	1	A	T	1	T	61.1	96	157	T	61.1465	96				TTTACACAATAAAACCACAC	GAGTGTTCAATTTTCGAAAC	TTTACACAATAAAACCACAC	GAGTGTTCAATTTTCGAAAC
BY4743_10-19	BY4743	WT	a/α	2n	VII	108651	108656	SNP	1	A	G	2	G/A	54.8/45.2	86/71	157	G	54.7771	86	A	45.2229	71	CAAGGGCAATGGTACTGATG	GCAAATCCGGTATTGGTTGC	CAAGGGCAATGGTACTGATG	GCAAATCCGGTATTGGTTGC
BY4743_10-19	BY4743	WT	a/α	2n	VII	545132	542446	SNP	1	C	A	2	A/C	51.3/48.7	77/73	150	A	51.3333	77	C	48.6667	73	TTAAAAAACACGCATTAACA	AGACACGAATTTGGCATACT	TTAAAAAACACGCATTAACA	AGACACGAATTTGGCATACT
BY4743_10-19	BY4743	WT	a/α	2n	VII	568788	561753	SNP	1	T	A	2	T/A	55.0/45.0	55/45	100	T	55	55	A	45	45	TGTTGGGATTCCATTGTGAT	AAGGCTATAATATTAGGTAT	TGTTGGGATTCCATTGTGAT	AAGGCTATAATATTAGGTAT
BY4743_10-19	BY4743	WT	a/α	2n	VII	1012687	996781	SNP	1	C	T	2	C/T	50.6/49.4	81/79	160	C	50.625	81	T	49.375	79	GGAAATTATGGCTACTACCA	GGATGATGACGGCATCCCCT	GGAAATTATGGCTACTACCA	GGATGATGACGGCATCCCCT
BY4743_10-19	BY4743	WT	a/α	2n	VII	1054994	1039088	SNP	1	T	C	2	C/T	54.1/45.9	92/78	170	C	54.1176	92	T	45.8824	78	TATCAATTTAGCCAGGTCTG	TTATAAGAAGAAGGATATTT	TATCAATTTAGCCAGGTCTG	TTATAAGAAGAAGGATATTT
BY4743_10-19	BY4743	WT	a/α	2n	VIII	230799	226357	SNP	1	T	G	2	T/G	51.1/48.9	89/85	174	T	51.1494	89	G	48.8506	85	CATACTTGATACATATAAAC	CTTTGTCTTTTAAATCATAG	CATACTTGATACATATAAAC	CTTTGTCTTTTAAATCATAG
BY4743_10-19	BY4743	WT	a/α	2n	VIII	411481	407039	SNP	1	T	C	2	T/C	52.5/47.5	104/94	198	T	52.5253	104	C	47.4747	94	TGTTTTTGAAGTAGGATTTT	GCCAATAAGACATTTCATAG	TGTTTTTGAAGTAGGATTTT	GCCAATAAGACATTTCATAG
BY4743_10-19	BY4743	WT	a/α	2n	VIII	475695	471253	SNP	1	C	A	2	A/C	53.2/46.8	91/80	171	A	53.2164	91	C	46.7836	80	GCTATGACAAACAAAAAAAT	CGATGTTAAAATGTTCCAAC	GCTATGACAAACAAAAAAAT	GATGTTAAAATGTTCCAACC
BY4743_10-19	BY4743	WT	a/α	2n	VIII	545379	537155	SNP	1	T	A	2	T/A	51.5/48.5	70/66	136	T	51.4706	70	A	48.5294	66	GTTAAAGATAAACATTGAAT	TATTACTCTTTTGGGGTCTA	GTTAAAGATAAACATTGAAT	TATTACTCTTTTGGGGTCTA
BY4743_10-19	BY4743	WT	a/α	2n	X	25523	11494	SNP	1	A	G	2	G/A	51.6/48.4	79/74	153	G	51.634	79	A	48.366	74	GAGGAGTCATAAATGGCTTT	CGGCACTCTTCATTTTCCCA	GAGGAGTCATAAATGGCTTT	CGGCACTCTTCATTTTCCCA
BY4743_10-19	BY4743	WT	a/α	2n	X	120379	106350	SNP	1	C	T	2	T/C	53.3/46.0	80/69	150	T	53.3333	80	C	46	69	TTATGTCCTTCCTTTTACCT	AAAGCTCAAAAAAATATCAA	TTATGTCCTTCCTTTTACCT	AAAGCTCAAAAAAATATCAA
BY4743_10-19	BY4743	WT	a/α	2n	X	127365	113336	SNP	1	G	T	1	T	57.5	88	153	T	57.5163	88				TCTCTCGCCCCAAACTACTT	ACCAAATTTGTTTGATTTCT	TCTCTCGCCCCAAACTACTT	ACCAAATTTGTTTGATTTCT
BY4743_10-19	BY4743	WT	a/α	2n	X	217144	203115	SNP	1	G	A	2	G/A	52.7/46.8	106/94	201	G	52.7363	106	A	46.7662	94	AATTTGGCTCAATTCTTCAA	AGCCTTACTAGCGTTTTCAA	AATTTGGCTCAATTCTTCAA	AGCCTTACTAGCGTTTTCAA
BY4743_10-19	BY4743	WT	a/α	2n	X	356259	342230	SNP	1	T	C	1	C	64.5	91	141	C	64.539	91				TGCTTGTTTATCCAAGTTGT	TCCAACAAGGTCACATACTG	TGCTTGTTTATCCAAGTTGT	TCCAACAAGGTCACATACTG
BY4743_10-19	BY4743	WT	a/α	2n	X	399949	385920	SNP	1	T	A	2	T/A	52.0/48.0	77/71	148	T	52.027	77	A	47.973	71	GAGAAGGAGCTGTATGTGAA	GAGTGGCTGTTGGTTCAGAG	GAGAAGGAGCTGTATGTGAA	GAGTGGCTGTTGGTTCAGAG
BY4743_10-19	BY4743	WT	a/α	2n	X	418752	404723	SNP	1	T	C	1	C	59.9	94	157	C	59.8726	94				GGCACCATTAGTAAATCCTT	GTATAAAGTAGTTATTATGT	GGCACCATTAGTAAATCCTT	GTATAAAGTAGTTATTATGT
BY4743_10-19	BY4743	WT	a/α	2n	X	647877	628495	SNP	1	A	G	2	G/A	54.6/45.4	89/74	163	G	54.6012	89	A	45.3988	74	CTCAACATTTGGGTGAAAAC	CTGTCAGAACCATTGCTATG	CTCAACATTTGGGTGAAAAC	CTGTCAGAACCATTGCTATG
BY4743_10-19	BY4743	WT	a/α	2n	X	743404	717653	SNP	1	T	G	1	G	55.7	93	167	G	55.6886	93				ATTTTTCAGTATTAAACAAC	TCCATTGTTTTTCAACTTCT	ATTTTTCAGTATTAAACAAC	TCCATTGTTTTTCAACTTCT
BY4743_10-19	BY4743	WT	a/α	2n	XI	517939	517941	SNP	1	T	C	2	C/T	53.8/46.2	56/48	104	C	53.8462	56	T	46.1538	48	TTTGATACATCACATTCTTG	AAAAATATATGATCCAATTC	TTTGATACATCACATTCTTG	AAAAATATATGATCCAATTC
BY4743_10-19	BY4743	WT	a/α	2n	XII	34544	28005	SNP	1	T	G	2	G/T	54.7/45.3	99/82	181	G	54.6961	99	T	45.3039	82	GGATAACTCTTCCAAAAGGA	GTTTATGGAAATTTTATCAT	GGATAACTCTTCCAAAAGGA	GTTTATGGAAATTTTATCAT
BY4743_10-19	BY4743	WT	a/α	2n	XII	56024	49484	SNP	1	T	C	1	C	98.7	156	158	C	98.7342	156				ACCCAACATTGGCCTTATAG	TAACAATAACTAAGGCCTGC	ACCCAACATTGGCCTTATAG	TAACAATAACTAAGGCCTGC
BY4743_10-19	BY4743	WT	a/α	2n	XII	252222	241779	SNP	1	G	T	2	G/T	51.3/48.7	61/58	119	G	51.2605	61	T	48.7395	58	CTCCATGTAGCGAACGCCCT	CATGGTAATCCCACCATTCT	CTCCATGTAGCGAACGCCCT	CATGGTAATCCCACCATTCT
BY4743_10-19	BY4743	WT	a/α	2n	XII	892875	844732	SNP	1	G	A	1	A	99.3	135	136	A	99.2647	135				ATCTTAGCTCCTGCCTCTTT	ACCCACTCTTGTCATGTTCA	ATCTTAGCTCCTGCCTCTTT	ACCCACTCTTGTCATGTTCA
BY4743_10-19	BY4743	WT	a/α	2n	XII	918383	870240	SNP	1	T	C	1	C	98	145	148	C	97.973	145				CTGTCCGTTTTGATCCTCAT	TTCAGCTGGAGAATCCATCG	CTGTCCGTTTTGATCCTCAT	TTCAGCTGGAGAATCCATCG
BY4743_10-19	BY4743	WT	a/α	2n	XII	926827	878684	SNP	1	C	T	1	T	58.9	96	163	T	58.8957	96				AGTAACAATAATAGTGGTAT	AATATCAATAATAATACCTC	AGTAACAATAATAGTGGTAT	AATATCAATAATAATACCTC
BY4743_10-19	BY4743	WT	a/α	2n	XII	1067348	1016887	SNP	1	A	G	1	G	90.3	28	31	G	90.3226	28				CGGTGCCACTTATGTGGATG	TCCATTTTGCCGTAGGATAC	CGGTGCCACTTATGTGGATG	TCCATTTTGCCGTAGGATAC
BY4743_10-19	BY4743	WT	a/α	2n	XIII	398957	382490	SNP	1	C	G	2	C/G	52.6/47.4	82/74	156	C	52.5641	82	G	47.4359	74	TGCATTCATAGCAGATCTTG	ACCCATAATAGAAAATTATG	TGCATTCATAGCAGATCTTG	ACCCATAATAGAAAATTATG
BY4743_10-19	BY4743	WT	a/α	2n	XIII	409896	393429	SNP	1	C	T	2	C/T	50.9/49.1	83/80	163	C	50.9202	83	T	49.0798	80	CCATCACCATCATAGTAATA	ACACAACAACCTCAACAATG	CCATCACCATCATAGTAATA	ACACAACAACCTCAACAATG
BY4743_10-19	BY4743	WT	a/α	2n	XIII	415482	399015	SNP	1	A	G	2	A/G	51.0/49.0	75/72	147	A	51.0204	75	G	48.9796	72	AACAACGATTGATAAACAAG	AAAACCAACTTTATTATGAA	AACAACGATTGATAAACAAG	AAAACCAACTTTATTATGAA
BY4743_10-19	BY4743	WT	a/α	2n	XIII	560339	543872	SNP	1	A	T	2	A/T	52.0/48.0	77/71	148	A	52.027	77	T	47.973	71	CCTTTGCCATTGGACTTGTT	TTCCGTGTTCCCTACTTTTT	CCTTTGCCATTGGACTTGTT	TTCCGTGTTCCCTACTTTTT
BY4743_10-19	BY4743	WT	a/α	2n	XIII	728818	712351	SNP	1	T	C	2	T/C	52.9/47.1	82/73	155	T	52.9032	82	C	47.0968	73	CGTCTTTAATCAGAGAACTT	TGAGGGACATATTGAAAACG	CGTCTTTAATCAGAGAACTT	TGAGGGACATATTGAAAACG
BY4743_10-19	BY4743	WT	a/α	2n	XIII	898823	882356	SNP	1	A	G	2	A/G	55.0/45.0	99/81	180	A	55	99	G	45	81	CTCCGCTGCTATACAAAATA	CCCAACTGACACCATTGTTA	CTCCGCTGCTATACAAAATA	CCCAACTGACACCATTGTTA
BY4743_10-19	BY4743	WT	a/α	2n	XIV	11572	5946	SNP	1	C	G	2	G/C	52.9/47.1	36/32	68	G	52.9412	36	C	47.0588	32	GTGAAACTGCTAGGCTTGTT	GGGAATATGCCGCTAAAGAA	GTGAAACTGCTAGGCTTGTT	GGGAATATGCCGCTAAAGAA
BY4743_10-19	BY4743	WT	a/α	2n	XIV	130529	124298	SNP	1	A	G	2	A/G	53.7/46.3	94/81	175	A	53.7143	94	G	46.2857	81	ATTGAAGCTTGGATAATTTA	CCTGACAATTTTTTCGACGT	ATTGAAGCTTGGATAATTTA	CCTGACAATTTTTTCGACGT
BY4743_10-19	BY4743	WT	a/α	2n	XIV	137729	131498	SNP	1	A	G	2	A/G	54.5/45.5	91/76	167	A	54.491	91	G	45.509	76	TGCTACGGAAGAGTAACAAA	AAAACAAAAACTGCATAACA	TGCTACGGAAGAGTAACAAA	AAAACAAAAACTGCATAACA
BY4743_10-19	BY4743	WT	a/α	2n	XIV	192963	186732	SNP	1	C	A	2	C/A	51.4/48.6	73/69	142	C	51.4085	73	A	48.5915	69	CACGAAAATATTGACAATGT	GAGCATTACGATCTCGAACT	CACGAAAATATTGACAATGT	GAGCATTACGATCTCGAACT
BY4743_10-19	BY4743	WT	a/α	2n	XIV	217249	211018	SNP	1	C	T	2	C/T	51.4/48.6	74/70	144	C	51.3889	74	T	48.6111	70	AGCACAATATTGTGCATGTA	AAGAGTGGGATGCGCATATA	AGCACAATATTGTGCATGTA	AAGAGTGGGATGCGCATATA
BY4743_10-19	BY4743	WT	a/α	2n	XIV	319562	313328	SNP	1	T	A	2	T/A	51.5/48.5	68/64	132	T	51.5152	68	A	48.4848	64	TCCCACATTATTAGTAGTTG	GTTACTTTTGCTGATATTTG	TCCCACATTATTAGTAGTTG	GTTACTTTTGCTGATATTTG
BY4743_10-19	BY4743	WT	a/α	2n	XIV	405228	398994	SNP	1	C	A	2	C/A	51.2/48.8	84/80	164	C	51.2195	84	A	48.7805	80	TAAAATTTTACTCAGGTTCT	GTTAAATATGGCAGCGCCCC	TAAAATTTTACTCAGGTTCT	GTTAAATATGGCAGCGCCCC
BY4743_10-19	BY4743	WT	a/α	2n	XIV	538056	531823	SNP	1	G	T	2	G/T	51.1/48.9	72/69	141	G	51.0638	72	T	48.9362	69	CGCTACATCTATGTCCTTCG	GTAAGCTAAACAAAAAGTGA	CGCTACATCTATGTCCTTCG	GTAAGCTAAACAAAAAGTGA
BY4743_10-19	BY4743	WT	a/α	2n	XIV	539544	533311	SNP	1	G	A	2	A/G	54.1/45.9	93/79	172	A	54.0698	93	G	45.9302	79	AGTTACAAAAGAAATATTTT	CAAAACTCGAAGATGATGGT	AGTTACAAAAGAAATATTTT	CAAAACTCGAAGATGATGGT
BY4743_10-19	BY4743	WT	a/α	2n	XIV	659826	652822	SNP	1	G	T	2	G/T	54.3/45.7	95/80	175	G	54.2857	95	T	45.7143	80	CATGTGTTTCCTGGAAGCTT	TCTATTTTCACCAAAAGCAA	CATGTGTTTCCTGGAAGCTT	TCTATTTTCACCAAAAGCAA
BY4743_10-19	BY4743	WT	a/α	2n	XIV	695818	688814	SNP	1	A	C	2	A/C	50.3/49.7	83/82	165	A	50.303	83	C	49.697	82	AGATTATGGGGCTAGTGAAG	GGATTCGAGTGAAGTGGAAG	AGATTATGGGGCTAGTGAAG	GGATTCGAGTGAAGTGGAAG
BY4743_10-19	BY4743	WT	a/α	2n	XIV	720553	713549	SNP	1	T	A	2	T/A	54.3/45.7	94/79	173	T	54.3353	94	A	45.6647	79	AATACACCTGAGGTCCCATG	TTTGCTGCTGGTGTTGTTCA	AATACACCTGAGGTCCCATG	TTTGCTGCTGGTGTTGTTCA
BY4743_10-19	BY4743	WT	a/α	2n	XV	779902	771242	SNP	1	C	A	2	A/C	52.7/46.5	68/60	129	A	52.7132	68	C	46.5116	60	AGGCCGTCAAAATTTTTTCA	CCCCCCATACCCCACATACC	AGGCCGTCAAAATTTTTTCA	CCCCCCATACCCCACATACC
BY4743_10-19	BY4743	WT	a/α	2n	XVI	49745	41898	SNP	1	T	A	2	A/T	53.4/46.6	87/76	163	A	53.3742	87	T	46.6258	76	GAGTCCTATTAAGGAAAGGC	GGAAGAAATCAGCAAGATTG	GAGTCCTATTAAGGAAAGGC	GGAAGAAATCAGCAAGATTG
BY4743_10-19	BY4743	WT	a/α	2n	XVI	129634	117413	SNP	1	C	A	2	A/C	51.4/48.6	75/71	146	A	51.3699	75	C	48.6301	71	TAAGGCAAAACTGCCATTGA	CTCATCTGTACCACCACATG	TAAGGCAAAACTGCCATTGA	CTCATCTGTACCACCACATG
BY4743_10-19	BY4743	WT	a/α	2n	XVI	224368	212138	SNP	1	T	C	2	C/T	51.9/47.5	83/76	160	C	51.875	83	T	47.5	76	TAATGCTAAAATCGTTCCTG	GGTCGCTTTGCTTCACCAGG	TAATGCTAAAATCGTTCCTG	GGTCGCTTTGCTTCACCAGG
BY4743_10-19	BY4743	WT	a/α	2n	XVI	479302	464099	SNP	1	G	A	2	A/G	54.9/45.1	67/55	122	A	54.918	67	G	45.082	55	TCATTTAAAAAGCAAAAAGT	GTATTGAAAAAGTTCATGAT	TCATTTAAAAAGCAAAAAGT	GTATTGAAAAAGTTCATGAT
BY4743_10-19	BY4743	WT	a/α	2n	XVI	491396	476192	SNP	1	A	G	2	A/G	54.0/46.0	61/52	113	A	53.9823	61	G	46.0177	52	GTGTGAGGGCGAGCAAAGCA	TTAAACGAAATTGATCTTAT	GTGTGAGGGCGAGCAAAGCA	TTAAACGAAATTGATCTTAT
BY4743_10-19	BY4743	WT	a/α	2n	XVI	542549	527345	SNP	1	C	T	2	C/T	53.9/46.1	83/71	154	C	53.8961	83	T	46.1039	71	CATTATAATCCTCATCTCTT	ACTTTTCATTAATGCATTGA	CATTATAATCCTCATCTCTT	ACTTTTCATTAATGCATTGA
BY4743_10-19	BY4743	WT	a/α	2n	XVI	549230	534026	SNP	1	G	T	2	T/G	53.8/46.2	71/61	132	T	53.7879	71	G	46.2121	61	AAATATTTGCACAAATGAAG	CTGAGGGGACTAAACCAAAT	AAATATTTGCACAAATGAAG	CTGAGGGGACTAAACCAAAT
BY4743_10-19	BY4743	WT	a/α	2n	XVI	856016	831670	SNP	1	T	A	2	A/T	52.9/47.1	64/57	121	A	52.8926	64	T	47.1074	57	GCTGTGGGTACGGCCCATTC	GTGGAGGTGGTACTGAAGCA	GCTGTGGGTACGGCCCATTC	GTGGAGGTGGTACTGAAGCA
BY4743_10-19	BY4743	WT	a/α	2n	XII	52619	46080	DIP	1	T	-	1	-	65.4	70	107	-	65.4206	70				ATAATTCTGTTTTTTAGCCC	TTTTTTTTTTTTTTCATGGT	ATAATTCTGTTTTTTAGCCC	TTTTTTTTTTTTTTCATGGT
BY4743_10-2	BY4743	WT	a/α	2n	II	19944	18412	SNP	1	C	T	2	T/C	50.7/49.3	71/69	140	T	50.7143	71	C	49.2857	69	TCTTCGCTAACATCTAAATC	TCAAACGATAGATTCTTTAG	TCTTCGCTAACATCTAAATC	TCAAACGATAGATTCTTTAG
BY4743_10-2	BY4743	WT	a/α	2n	II	67732	65933	SNP	1	T	A	2	T/A	50.3/49.7	81/80	161	T	50.3106	81	A	49.6894	80	AGTATACGCGTATGCAAAAT	TGGGTCTAACTGAGTAGCTT	AGTATACGCGTATGCAAAAT	TGGGTCTAACTGAGTAGCTT
BY4743_10-2	BY4743	WT	a/α	2n	II	158429	156625	SNP	1	A	C	2	A/C	55.0/45.0	83/68	151	A	54.9669	83	C	45.0331	68	GTCTCTCCAAAAACCCTAAT	ATTACCGCTAAATATGCCTG	GTCTCTCCAAAAACCCTAAT	ATTACCGCTAAATATGCCTG
BY4743_10-2	BY4743	WT	a/α	2n	II	273156	270140	SNP	1	G	T	2	T/G	52.3/47.7	67/61	128	T	52.3438	67	G	47.6562	61	CCATAGGCTTCGTATTTCCC	ACCATTCCAATTGGAAAAAT	CCATAGGCTTCGTATTTCCC	ACCATTCCAATTGGAAAAAT
BY4743_10-2	BY4743	WT	a/α	2n	III	175932	165810	SNP	1	G	T	2	T/G	54.8/45.2	85/70	155	T	54.8387	85	G	45.1613	70	TGCCTTCTTGCCTCTTCTAA	TGACTAGAGTTTTCGTTATT	TGCCTTCTTGCCTCTTCTAA	TGACTAGAGTTTTCGTTATT
BY4743_10-2	BY4743	WT	a/α	2n	III	177095	166973	SNP	1	G	A	2	A/G	54.7/45.3	81/67	148	A	54.7297	81	G	45.2703	67	GAAAAGGCGTAGACATGGAA	ATGACAATGACGAGAACGTC	GAAAAGGCGTAGACATGGAA	ATGACAATGACGAGAACGTC
BY4743_10-2	BY4743	WT	a/α	2n	III	303650	293082	SNP	1	A	T	1	T	59.4	82	138	T	59.4203	82				CTCACCTCGTGATGTTACGA	CGCCACGATTATTCTCAAAC	CTCACCTCGTGATGTTACGA	CGCCACGATTATTCTCAAAC
BY4743_10-2	BY4743	WT	a/α	2n	IV	448669	446806	SNP	1	A	C	2	A/C	50.4/49.6	65/64	129	A	50.3876	65	C	49.6124	64	AGAAAAAGCTTTCTTAAACG	TATAGAAAAGTTCGAAAAAG	AGAAAAAGCTTTCTTAAACG	TATAGAAAAGTTCGAAAAAG
BY4743_10-2	BY4743	WT	a/α	2n	IV	719418	707534	SNP	1	T	C	2	C/T	52.7/47.3	59/53	112	C	52.6786	59	T	47.3214	53	ATTTGCTGGCTGTTCACGGG	TTTTGATAGCGAGTCGCATT	ATTTGCTGGCTGTTCACGGG	TTTTGATAGCGAGTCGCATT
BY4743_10-2	BY4743	WT	a/α	2n	IV	864077	852194	SNP	1	T	C	2	C/T	52.5/47.5	53/48	101	C	52.4752	53	T	47.5248	48	GAACAAAGTAAATGTAGAAC	GTTAAAAATCGAACTAAGCG	GAACAAAGTAAATGTAGAAC	GTTAAAAATCGAACTAAGCG
BY4743_10-2	BY4743	WT	a/α	2n	IV	1521388	1496401	SNP	1	T	C	1	C	74.8	101	135	C	74.8148	101				TAAAGGTTAGAAATACGACC	CTAATCTGCTTTAAGCAGAT	TAAAGGTTAGAAATACGACC	CTAATCTGCTTTAAGCAGAT
BY4743_10-2	BY4743	WT	a/α	2n	IV	1525426	1500437	SNP	1	T	G	2	T/G	52.4/47.6	2017-11-10	21	T	52.381	11	G	47.619	10	GTGTGGGTGTGGTGTGGGTG	GGTGGGTGTGGTGTGGTGTG	GTGTGGGTGTGGTGTGGGTG	GGTGGGTGTGGTGTGGTGTG
BY4743_10-2	BY4743	WT	a/α	2n	VII	29731	29736	SNP	1	A	G	2	A/G	52.4/47.6	77/70	147	A	52.381	77	G	47.619	70	GATTTATCTGAGAGTCTTCA	CGGAATGAAAACTAACGTAT	GATTTATCTGAGAGTCTTCA	CGGAATGAAAACTAACGTAT
BY4743_10-2	BY4743	WT	a/α	2n	VII	97479	97484	SNP	1	G	A	1	A	97.8	132	135	A	97.7778	132				TGGATGCTGTGAGCAAGAAA	TTACTGAACTGAGCTTAAAT	TGGATGCTGTGAGCAAGAAA	TTACTGAACTGAGCTTAAAT
BY4743_10-2	BY4743	WT	a/α	2n	VII	331266	331271	SNP	1	T	C	1	C	61.6	69	112	C	61.6071	69				TATGGGCATCTTCAATTGAA	CGTGATTTCCCTCTTGGATA	TATGGGCATCTTCAATTGAA	CGTGATTTCCCTCTTGGATA
BY4743_10-2	BY4743	WT	a/α	2n	VII	880428	866512	SNP	1	A	G	2	G/A	52.6/47.4	70/63	133	G	52.6316	70	A	47.3684	63	TCAAAATCAAAAATGCCTAG	AACCCATTGAAAAAGGAATA	TCAAAATCAAAAATGCCTAG	AACCCATTGAAAAAGGAATA
BY4743_10-2	BY4743	WT	a/α	2n	IX	42154	26305	SNP	1	A	G	2	G/A	53.2/46.8	100/88	188	G	53.1915	100	A	46.8085	88	AGAATGTTTGATGAGCTTTT	AAAGATGGAACTTTTTTTTG	AGAATGTTTGATGAGCTTTT	AAAGATGGAACTTTTTTTTG
BY4743_10-2	BY4743	WT	a/α	2n	X	91332	77989	SNP	1	T	C	1	C	97.1	102	105	C	97.1429	102				AAGCGTATAGCATAGTGTTT	CTAATCTTATTTTTTCTTAC	AAGCGTATAGCATAGTGTTT	CTAATCTTATTTTTTCTTAC
BY4743_10-2	BY4743	WT	a/α	2n	XII	6228	2342	SNP	1	G	A	1	A	61.1	11	18	A	61.1111	11				TGAACCGCTACCATCAGCAT	TACAGCGGTACCCTCGTGTT	TGAACCGCTACCATCAGCAT	TACAGCGGTACCCTCGTGTT
BY4743_10-2	BY4743	WT	a/α	2n	XIII	673087	657987	SNP	1	C	T	1	T	56.3	81	144	T	56.25	81				TTGTTTAAATGTTCAATGAA	TCAGTGTCTCTTAAAGACAT	TTGTTTAAATGTTCAATGAA	TCAGTGTCTCTTAAAGACAT
BY4743_10-2	BY4743	WT	a/α	2n	XIII	682275	667175	SNP	1	T	A	2	T/A	50.0/49.2	60/59	120	T	50	60	A	49.1667	59	GCATCTTGCCTATCGTTTCC	ACAGCAAAAATGTGCCCAAA	GCATCTTGCCTATCGTTTCC	ACAGCAAAAATGTGCCCAAA
BY4743_10-2	BY4743	WT	a/α	2n	XIV	385281	379578	SNP	1	A	T	1	T	55	60	109	T	55.0459	60				TGGTGACAGTTCTGTCTACA	ACAGACCAAATCATCTATTT	TGGTGACAGTTCTGTCTACA	ACAGACCAAATCATCTATTT
BY4743_10-2	BY4743	WT	a/α	2n	XIV	763512	757544	SNP	1	T	C	2	T/C	54.0/46.0	67/57	124	T	54.0323	67	C	45.9677	57	TAAAGTGTACAGTAACGTTT	GAAAGTTTCCTTTCTCAAAT	TAAAGTGTACAGTAACGTTT	GAAAGTTTCCTTTCTCAAAT
BY4743_10-2	BY4743	WT	a/α	2n	XV	303839	300778	SNP	1	G	A	2	A/G	50.0/50.0	66/66	132	A	50	66	G	50	66	TTTGGATCCTACTCTTGTTC	GCCGGTAGCGTGCCTTTTCA	TTTGGATCCTACTCTTGTTC	GCCGGTAGCGTGCCTTTTCA
BY4743_10-2	BY4743	WT	a/α	2n	XV	418393	415332	SNP	1	T	C	2	T/C	52.9/47.1	64/57	121	T	52.8926	64	C	47.1074	57	TAAATCAAAATAGAGTTCGG	CTATTGGCTTACAAGGATTT	TAAATCAAAATAGAGTTCGG	CTATTGGCTTACAAGGATTT
BY4743_10-2	BY4743	WT	a/α	2n	XV	727082	719484	SNP	1	T	G	2	T/G	53.1/46.9	60/53	113	T	53.0973	60	G	46.9027	53	TGGAGGTCAGGATTTAGTTT	GAGTCGGGTAGACTTTTTGG	TGGAGGTCAGGATTTAGTTT	GAGTCGGGTAGACTTTTTGG
BY4743_10-2	BY4743	WT	a/α	2n	XV	854058	846460	SNP	1	A	G	2	G/A	51.6/48.4	65/61	126	G	51.5873	65	A	48.4127	61	ATAAGGTACGAGGGCAAAAA	AGTTCCATAACTTATGAGGA	ATAAGGTACGAGGGCAAAAA	AGTTCCATAACTTATGAGGA
BY4743_10-2	BY4743	WT	a/α	2n	XVI	62958	51558	SNP	1	T	C	2	T/C	54.1/45.9	80/68	148	T	54.0541	80	C	45.9459	68	ATACATGATATTATAGCCTT	ATCAACAATGGAATCCCAAC	ATACATGATATTATAGCCTT	ATCAACAATGGAATCCCAAC
BY4743_10-2	BY4743	WT	a/α	2n	I	23713	23715	DIP	1	-	A	2	-/A	48.5/45.6	33/31	68	-	48.5294	33	A	45.5882	31	TTGTTTGCAGGATATAAATC	AAAAAAAAAAAAAAAAAAAA	TTGTTTGCAGGATATAAATC	AAAAAAAAAAAAAAAAAAAA
BY4743_10-2	BY4743	WT	a/α	2n	IV	1525392	1500404	DIP	1	T	-	1	-	50.7	35	69	-	50.7246	35				GGTGTGGGTGTGTGGGTGTG	GGGTGTGGTGTGGGTGTGGG	GGTGT-GGTGTGTGGGTGTG	GTGTGTGGTGTGGGTGTGGG
BY4743_10-2	BY4743	WT	a/α	2n	Mito	1683	1683	DIP	1	C	-	1	-	91.6	761	831	-	91.5764	761				ATTGTAAATAATAATAAGGA	CCCCCCCATTATCTAATTAA	ATTGTAAATAATAATAAGGA	CCCCCCCATTATCTAATTAA
BY4743_10-20	BY4743	WT	a/α	2n	I	1706	1575	SNP	1	T	A	1	A	98.9	90	91	A	98.9011	90				TAATATACATTTATATAATC	ACGGTATTTATATCATCAAA	TAATATACATTTATATAATC	ACGGTATTTATATCATCAAA
BY4743_10-20	BY4743	WT	a/α	2n	I	1731	1600	SNP	1	A	T	1	T	99.2	121	122	T	99.1803	121				TATTTATATCATCAAAAAAA	GTAGTTTTTTTATTTTATTT	TATTTATATCATCAAAAAAA	GTAGTTTTTTTATTTTATTT
BY4743_10-20	BY4743	WT	a/α	2n	I	206055	203705	SNP	1	A	G	2	A/G	54.9/45.1	89/73	162	A	54.9383	89	G	45.0617	73	AAATGACCACCATTACTGGA	CCAATGGTCAACCAACTGAC	AAATGACCACCATTACTGGA	CCAATGGTCAACCAACTGAC
BY4743_10-20	BY4743	WT	a/α	2n	II	546410	543474	SNP	1	C	A	2	C/A	54.2/45.8	91/77	168	C	54.1667	91	A	45.8333	77	TTTCAAGAGGAGACTTGACA	AAGCTCAGCAGATGAAAGCT	TTTCAAGAGGAGACTTGACA	AAGCTCAGCAGATGAAAGCT
BY4743_10-20	BY4743	WT	a/α	2n	II	566135	563199	SNP	1	A	T	2	A/T	51.5/48.5	101/95	196	A	51.5306	101	T	48.4694	95	CACACAATTATGCACTACGC	GAATTGGTGCGAGTTAAGGA	CACACAATTATGCACTACGC	GAATTGGTGCGAGTTAAGGA
BY4743_10-20	BY4743	WT	a/α	2n	III	305941	294661	SNP	1	T	A	2	A/T	53.3/46.7	114/100	214	A	53.271	114	T	46.729	100	CTCTACTACCGCACTTTCTA	CTCGGAAACCTTTCAACTGA	CTCTACTACCGCACTTTCTA	CTCGGAAACCTTTCAACTGA
BY4743_10-20	BY4743	WT	a/α	2n	IV	127818	125656	SNP	1	T	C	2	T/C	52.2/47.8	84/77	161	T	52.1739	84	C	47.8261	77	CAGCACAGAGCCCACAAAAG	GACTCAAGTCGTGAAGTGCC	CAGCACAGAGCCCACAAAAG	GACTCAAGTCGTGAAGTGCC
BY4743_10-20	BY4743	WT	a/α	2n	IV	140557	138395	SNP	1	A	G	2	A/G	49.7/49.7	88/88	177	A	49.7175	88	G	49.7175	88	CATTTTATATTCTTATCGAA	CGTCAGGGTCAAACAAAGAT	CATTTTATATTCTTATCGAA	CGTCAGGGTCAAACAAAGAT
BY4743_10-20	BY4743	WT	a/α	2n	IV	631581	623103	SNP	1	A	G	2	A/G	52.4/47.6	54/49	103	A	52.4272	54	G	47.5728	49	GATGAACTCAATGGTAAAAA	ACCGAGATACATGAACACGA	GATGAACTCAATGGTAAAAA	ACCGAGATACATGAACACGA
BY4743_10-20	BY4743	WT	a/α	2n	IV	1139463	1118384	SNP	1	G	A	2	G/A	50.9/49.1	87/84	171	G	50.8772	87	A	49.1228	84	TGGATAATAGAAAGATCATA	ATACCTTTGCAGTGTTAACC	TGGATAATAGAAAGATCATA	ATACCTTTGCAGTGTTAACC
BY4743_10-20	BY4743	WT	a/α	2n	IV	1166857	1144761	SNP	1	A	G	1	G	57.6	83	144	G	57.6389	83				ACGTACTTACTCCTACCAGC	CCTGTATTATAACCTTTTCT	ACGTACTTACTCCTACCAGC	CCTGTATTATAACCTTTTCT
BY4743_10-20	BY4743	WT	a/α	2n	IV	1368813	1343826	SNP	1	T	C	2	T/C	50.6/49.4	87/85	172	T	50.5814	87	C	49.4186	85	TGGGCAGGTTTACGTGGTGC	GTTGGTGTCGCCTTGGCGTT	TGGGCAGGTTTACGTGGTGC	GTTGGTGTCGCCTTGGCGTT
BY4743_10-20	BY4743	WT	a/α	2n	IV	1391940	1366953	SNP	1	A	T	2	A/T	52.9/47.1	92/82	174	A	52.8736	92	T	47.1264	82	CCTGTGGAAAATAATGTTGA	ACAGCGAAAGAAACCCAAAG	CCTGTGGAAAATAATGTTGA	ACAGCGAAAGAAACCCAAAG
BY4743_10-20	BY4743	WT	a/α	2n	V	569779	561251	SNP	1	G	A	1	A	65.4	214	327	A	65.4434	214				TATTTGGGGCCGCCGAATGA	ATATAGATATTAAAATGTGG	TATTTGGGGCCGCCGAATGA	ATATAGATATTAAAATGTGG
BY4743_10-20	BY4743	WT	a/α	2n	VI	57867	57573	SNP	1	A	G	2	A/G	52.6/47.4	70/63	133	A	52.6316	70	G	47.3684	63	TACTGAAGTATGTAATTCAA	ATATATATATGTATATGTAT	TACTGAAGTATGTAATTCAA	ATATATATATGTATATGTAT
BY4743_10-20	BY4743	WT	a/α	2n	VII	170074	170079	SNP	1	C	G	2	G/C	52.7/47.3	89/80	169	G	52.6627	89	C	47.3373	80	AGAAAATTCACTCTCCGCAA	AAATTATGAACTTCAACCAA	AGAAAATTCACTCTCCGCAA	AAATTATGAACTTCAACCAA
BY4743_10-20	BY4743	WT	a/α	2n	VII	788321	780482	SNP	1	G	A	2	G/A	54.3/45.7	89/75	164	G	54.2683	89	A	45.7317	75	TTTCTGGCTAGATGTCAACT	CGCAAGAGCAATCAGGCCAA	TTTCTGGCTAGATGTCAACT	CGCAAGAGCAATCAGGCCAA
BY4743_10-20	BY4743	WT	a/α	2n	VII	1076256	1062337	SNP	1	C	G	2	C/G	50.6/49.4	86/84	170	C	50.5882	86	G	49.4118	84	GTTGAAAATTTCGCTAAACA	GGGGTTTAAGTTAAAGTTTA	GTTGAAAATTTCGCTAAACA	GGGGTTTAAGTTAAAGTTTA
BY4743_10-20	BY4743	WT	a/α	2n	VIII	281853	278731	SNP	1	A	G	2	G/A	51.9/48.1	95/88	183	G	51.9126	95	A	48.0874	88	TTTAATCGAAATTTTACCAA	CGTCACATTTGTGAAAAGAA	TTTAATCGAAATTTTACCAA	CGTCACATTTGTGAAAAGAA
BY4743_10-20	BY4743	WT	a/α	2n	IX	244907	230001	SNP	1	C	A	1	A	58.9	116	197	A	58.8832	116				ATGTACTTGCGCTTGCAAAC	TTCCTGGAAGCCTGCTGTCT	ATGTACTTGCGCTTGCAAAC	TTCCTGGAAGCCTGCTGTCT
BY4743_10-20	BY4743	WT	a/α	2n	X	288127	274795	SNP	1	G	A	2	A/G	54.9/45.1	100/82	182	A	54.9451	100	G	45.0549	82	TATCGCGCAAACCGACAAAT	ACACAAGCTCATCATCAGGA	TATCGCGCAAACCGACAAAT	ACACAAGCTCATCATCAGGA
BY4743_10-20	BY4743	WT	a/α	2n	X	400196	386864	SNP	1	C	T	2	C/T	51.8/48.2	88/82	170	C	51.7647	88	T	48.2353	82	TGCTGAGAGTGCTGGAGGTG	TGAAGATACTGGAGGTACTG	TGCTGAGAGTGCTGGAGGTG	TGAAGATACTGGAGGTACTG
BY4743_10-20	BY4743	WT	a/α	2n	X	400199	386867	SNP	1	A	G	2	G/A	50.9/49.1	85/82	167	G	50.8982	85	A	49.1018	82	TGAGAGTGCTGGAGGTGCTG	AGATACTGGAGGTACTGGGG	TGAGAGTGCTGGAGGTGCTG	AGATACTGGAGGTACTGGGG
BY4743_10-20	BY4743	WT	a/α	2n	X	400202	386870	SNP	1	A	G	2	G/A	52.3/47.7	92/84	176	G	52.2727	92	A	47.7273	84	GAGTGCTGGAGGTGCTGAAG	TACTGGAGGTACTGGGGGTA	GAGTGCTGGAGGTGCTGAAG	TACTGGAGGTACTGGGGGTA
BY4743_10-20	BY4743	WT	a/α	2n	X	400235	386903	SNP	1	A	G	2	G/A	51.4/48.6	91/86	177	G	51.4124	91	A	48.5876	86	TGGGGGTACTGGGGGTACTG	AGGTGCAGAGAGTGCTGGAG	TGGGGGTACTGGGGGTACTG	AGGTGCAGAGAGTGCTGGAG
BY4743_10-20	BY4743	WT	a/α	2n	X	614396	595946	SNP	1	T	C	2	T/C	51.6/48.4	95/89	184	T	51.6304	95	C	48.3696	89	TTCGCTTATGAGTAGTAGCA	CCCTTAGCACACTACCTCGA	TTCGCTTATGAGTAGTAGCA	CCCTTAGCACACTACCTCGA
BY4743_10-20	BY4743	WT	a/α	2n	XI	222269	222273	SNP	1	A	G	1	G	99.4	164	165	G	99.3939	164				TAGGATTGCTTTGGTCCATG	GTTCATATAAAAGTACGGTA	TAGGATTGCTTTGGTCCATG	GTTCATATAAAAGTACGGTA
BY4743_10-20	BY4743	WT	a/α	2n	XI	458520	458518	SNP	1	G	C	2	G/C	53.7/46.3	109/94	203	G	53.6946	109	C	46.3054	94	GATTAACTTAATACATGACT	GGTATACTTGAATTCTAAAA	GATTAACTTAATACATGACT	GGTATACTTGAATTCTAAAA
BY4743_10-20	BY4743	WT	a/α	2n	XI	508997	508999	SNP	1	G	T	2	G/T	53.1/46.9	104/92	196	G	53.0612	104	T	46.9388	92	TCCTTACGCTATTGTCCATC	AGCCTGTTACCAATTTTTCG	TCCTTACGCTATTGTCCATC	AGCCTGTTACCAATTTTTCG
BY4743_10-20	BY4743	WT	a/α	2n	XI	515091	515093	SNP	1	A	G	1	G	55.9	113	202	G	55.9406	113				TACTTCTTCGTACGAGAAGA	TAATCCAGATAATCTGAAAC	TACTTCTTCGTACGAGAAGA	TAATCCAGATAATCTGAAAC
BY4743_10-20	BY4743	WT	a/α	2n	XI	623471	623473	SNP	1	A	G	2	A/G	53.1/46.9	119/105	224	A	53.125	119	G	46.875	105	TAAATCTATTAAGAGAAAGT	ACATAACATTGCGGAATGAG	TAAATCTATTAAGAGAAAGT	ACATAACATTGCGGAATGAG
BY4743_10-20	BY4743	WT	a/α	2n	XII	61948	55507	SNP	1	T	A	2	T/A	50.3/49.7	91/90	181	T	50.2762	91	A	49.7238	90	AACGCGTTGGGTGAGCCATC	TCGAGACTGAATTTGTTCAA	AACGCGTTGGGTGAGCCATC	TCGAGACTGAATTTGTTCAA
BY4743_10-20	BY4743	WT	a/α	2n	XII	113868	107427	SNP	1	T	C	2	C/T	51.5/48.5	101/95	196	C	51.5306	101	T	48.4694	95	GTTGGGAGATGAGAATAGAG	TTTTTGACGAAGATGTCGCT	GTTGGGAGATGAGAATAGAG	TTTTGACGAAGATGTCGCTA
BY4743_10-20	BY4743	WT	a/α	2n	XII	923967	879671	SNP	1	T	C	1	C	98.8	164	166	C	98.7952	164				TATTATCTTCTTTATTCAGA	GAGACGATAAAAATCTGCAT	TATTATCTTCTTTATTCAGA	GAGACGATAAAAATCTGCAT
BY4743_10-20	BY4743	WT	a/α	2n	XIV	6652	1089	SNP	1	C	A	1	A	57.9	55	95	A	57.8947	55				CACACACCACACCCACACAC	CCACACCACACCCACACCCA	CACACACCACACCCACACCC	CACACCACACCCACACCCAC
BY4743_10-20	BY4743	WT	a/α	2n	XIV	48943	43382	SNP	1	A	T	2	A/T	54.0/46.0	94/80	174	A	54.023	94	T	45.977	80	GCCAGTGGAATGATGAAACA	CCTTTGGAGAGTGCATCCAA	GCCAGTGGAATGATGAAACA	CCTTTGGAGAGTGCATCCAA
BY4743_10-20	BY4743	WT	a/α	2n	XIV	58940	53379	SNP	1	C	A	2	C/A	52.5/47.5	93/84	177	C	52.5424	93	A	47.4576	84	GCCAAAATCCTTAAAATAGA	AAAAACAAATTGACGATGTC	GCCAAAATCCTTAAAATAGA	AAAAACAAATTGACGATGTC
BY4743_10-20	BY4743	WT	a/α	2n	XIV	241042	235223	SNP	1	G	T	2	T/G	50.6/49.4	82/80	162	T	50.6173	82	G	49.3827	80	TGTCAAACATGAAGTACGTT	ATAAGAAGAACTGGTCAAAA	TGTCAAACATGAAGTACGTT	ATAAGAAGAACTGGTCAAAA
BY4743_10-20	BY4743	WT	a/α	2n	XIV	466487	460666	SNP	1	G	T	1	T	56.1	92	164	T	56.0976	92				TCATCCTTATGCTTCGGAAG	TTCGCGATAAACTTCGAAGA	TCATCCTTATGCTTCGGAAG	TTCGCGATAAACTTCGAAGA
BY4743_10-20	BY4743	WT	a/α	2n	XIV	492841	487020	SNP	1	G	A	2	A/G	53.8/46.3	86/74	160	A	53.75	86	G	46.25	74	AGACGCCGCTGCTGAGAACG	ATTCTCCTTTGATAACCAGG	AGACGCCGCTGCTGAGAACG	ATTCTCCTTTGATAACCAGG
BY4743_10-20	BY4743	WT	a/α	2n	XIV	497269	491448	SNP	1	G	A	2	A/G	50.5/49.5	93/91	184	A	50.5435	93	G	49.4565	91	AGTTGCGTATGAATGAGGTG	TTTAACGTTCCTGTTTTCGT	AGTTGCGTATGAATGAGGTG	TTTAACGTTCCTGTTTTCGT
BY4743_10-20	BY4743	WT	a/α	2n	XIV	498433	492612	SNP	1	G	C	1	C	62.3	81	130	C	62.3077	81				TTGGCTTTGAAGTGTTTTTA	CCTTTTGTTCCTTAGTATGA	TTGGCTTTGAAGTGTTTTTA	CCTTTTGTTCCTTAGTATGA
BY4743_10-20	BY4743	WT	a/α	2n	XIV	604105	597669	SNP	1	C	T	1	T	58	101	174	T	58.046	101				TGTTGCCTTGGCAAACTTCC	ATTTCAAGGCAGAAACTTGA	TGTTGCCTTGGCAAACTTCC	ATTTCAAGGCAGAAACTTGA
BY4743_10-20	BY4743	WT	a/α	2n	XV	426453	423345	SNP	1	A	T	2	T/A	52.0/48.0	79/73	152	T	51.9737	79	A	48.0263	73	GTACAAAAAAAGAAACGAAA	ACCAAAGACCAACCAACAGA	GTACAAAAAAAGAAACGAAA	ACCAAAGACCAACCAACAGA
BY4743_10-20	BY4743	WT	a/α	2n	XV	511044	507936	SNP	1	G	A	2	A/G	53.1/46.9	85/75	160	A	53.125	85	G	46.875	75	TCCAAATGATTCGCGTATGA	AGGTTTGAACTGAAAACTTT	TCCAAATGATTCGCGTATGA	AGGTTTGAACTGAAAACTTT
BY4743_10-20	BY4743	WT	a/α	2n	XV	571409	568301	SNP	1	A	G	1	G	56	108	193	G	55.9585	108				GACTCGTATACATAACTACC	AAGCGTAGATCTTTAACTTA	GACTCGTATACATAACTACC	AAGCGTAGATCTTTAACTTA
BY4743_10-20	BY4743	WT	a/α	2n	XV	575852	572744	SNP	1	C	G	2	C/G	53.0/47.0	35/31	66	C	53.0303	35	G	46.9697	31	GGGTGACTCTTTCTTCAACC	AAAGACCAAGAAGTGGACCA	GGGTGACTCTTTCTTCAACC	AAAGACCAAGAAGTGGACCA
BY4743_10-20	BY4743	WT	a/α	2n	XV	620096	613741	SNP	1	C	A	2	C/A	52.3/47.7	81/74	155	C	52.2581	81	A	47.7419	74	AAACCCGATATTCTCTGATC	TGAAGCTCCAGGCTATGACC	AAACCCGATATTCTCTGATC	TGAAGCTCCAGGCTATGACC
BY4743_10-20	BY4743	WT	a/α	2n	XV	635398	629043	SNP	1	A	G	2	A/G	53.4/46.6	78/68	146	A	53.4247	78	G	46.5753	68	TATATTTTTAACGGTTTTCA	CTGCATGAGGGTTCATCGGA	TATATTTTTAACGGTTTTCA	CTGCATGAGGGTTCATCGGA
BY4743_10-20	BY4743	WT	a/α	2n	XV	710519	703336	SNP	1	A	T	2	A/T	51.3/48.7	80/76	156	A	51.2821	80	T	48.7179	76	AAATGCAGACGAATCATGGG	GCTCTTGAAAAGAGAGTTTA	AAATGCAGACGAATCATGGG	GCTCTTGAAAAGAGAGTTTA
BY4743_10-20	BY4743	WT	a/α	2n	XV	717041	709858	SNP	1	G	T	1	T	98.8	164	166	T	98.7952	164				ATATGAAGATGAGCCTCGAA	TTTATCTAAACTACCACCAA	ATATGAAGATGAGCCTCGAA	TTTATCTAAACTACCACCAA
BY4743_10-20	BY4743	WT	a/α	2n	XV	958037	950671	SNP	1	A	G	1	G	99	196	198	G	98.9899	196				CGTATCGTTTCATCGTTTAA	CGAGCAAATTTGATAAGTAC	CGTATCGTTTCATCGTTTAA	CGAGCAAATTTGATAAGTAC
BY4743_10-20	BY4743	WT	a/α	2n	XVI	458458	443274	SNP	1	T	C	2	T/C	51.7/48.3	78/73	151	T	51.6556	78	C	48.3444	73	TTTGCTCAGCAGTACGTGCA	CTTACCTTATCTTATCTTCA	TTTGCTCAGCAGTACGTGCA	CTTACCTTATCTTATCTTCA
BY4743_10-20	BY4743	WT	a/α	2n	XVI	487879	472694	SNP	1	T	C	2	T/C	53.4/46.6	87/76	163	T	53.3742	87	C	46.6258	76	ATTCGATTCCCTCCTGCATG	TGTTAATGAGCACTGTAGGA	ATTCGATTCCCTCCTGCATG	TGTTAATGAGCACTGTAGGA
BY4743_10-20	BY4743	WT	a/α	2n	XVI	783645	768460	SNP	1	A	T	1	T	99.4	167	168	T	99.4048	167				ATCTGGTAATATATTTGATA	AATGAAAAATAAAAGTGATA	ATCTGGTAATATATTTGATA	AATGAAAAATAAAAGTGATA
BY4743_10-20	BY4743	WT	a/α	2n	Mito	35230	35232	SNP	1	T	A	2	T/A	52.4/47.6	393/357	750	T	52.4	393	A	47.6	357	TATTTTATTTTATTTTATTT	ATTTTATTTTATTTTATTTA	TATTTTATTTTATTTTATTT	ATTTTATTTTATTTTATTTA
BY4743_10-20	BY4743	WT	a/α	2n	XV	110989	110986	DIP	1	C	-	2	C/-	52.7/47.3	99/89	188	C	52.6596	99	-	47.3404	89	TACGAGAATCGAACCCGTGT	CCCACCTTGGAAGGGTGGGA	TACGAGAATCGAACCCGTGT	CCCACCTTGGAAGGGTGGGA
BY4743_10-21	BY4743	WT	a/α	2n	I	138817	138633	SNP	1	A	G	1	G	58.3	74	127	G	58.2677	74				TCGAAGACCAGCAGAAGGGA	CCAATATCACGACATTAAAA	TCGAAGACCAGCAGAAGGGA	CCAATATCACGACATTAAAA
BY4743_10-21	BY4743	WT	a/α	2n	II	46188	44773	SNP	1	C	T	2	C/T	54.5/45.5	60/50	110	C	54.5455	60	T	45.4545	50	AGTTTTTGTCACCATCTGGT	ACAAGACTTTCTTAGTCGCT	AGTTTTTGTCACCATCTGGT	ACAAGACTTTCTTAGTCGCT
BY4743_10-21	BY4743	WT	a/α	2n	II	148576	147156	SNP	1	A	T	2	T/A	52.7/47.3	58/52	110	T	52.7273	58	A	47.2727	52	TATACCTTTACTGATGTTGA	AACGTTAAGATTATTGTGGA	TATACCTTTACTGATGTTGA	AACGTTAAGATTATTGTGGA
BY4743_10-21	BY4743	WT	a/α	2n	II	197671	196251	SNP	1	G	A	2	G/A	52.3/47.7	68/62	130	G	52.3077	68	A	47.6923	62	GGGGGCCCAACGATGGCAAC	TTGGATTTTACCACTAAACC	GGGGGCCCAACGATGGCAAC	TTGGATTTTACCACTAAACC
BY4743_10-21	BY4743	WT	a/α	2n	II	786030	782941	SNP	1	G	A	1	A	72.5	74	102	A	72.549	74				TGGTAAAGTGTGGTGATAAG	CATAGTGATGTTTACAGAGG	TGGTAAAGTGTGGTGATAAG	CATAGTGATGTTTACAGAGG
BY4743_10-21	BY4743	WT	a/α	2n	IV	323106	320748	SNP	1	T	A	2	A/T	54.6/45.4	59/49	108	A	54.6296	59	T	45.3704	49	TATTCATTGAAGCGGGGCAC	CAGATCAATTTTTATCAATG	TATTCATTGAAGCGGGGCAC	CAGATCAATTTTTATCAATG
BY4743_10-21	BY4743	WT	a/α	2n	IV	346844	344488	SNP	1	A	G	2	A/G	50.0/50.0	53/53	106	A	50	53	G	50	53	CTACTGCAAACGGTGGTCCA	TTAAATTAATTCCTGTAGTC	CTACTGCAAACGGTGGTCCA	TTAAATTAATTCCTGTAGTC
BY4743_10-21	BY4743	WT	a/α	2n	VI	8883	8535	SNP	1	A	T	2	A/T	51.4/48.6	55/52	107	A	51.4019	55	T	48.5981	52	AAAGGATCCTCTAAGATAAA	CACAGATCGACAGATCCGAG	AAAGGATCCTCTAAGATAAA	CACAGATCGACAGATCCGAG
BY4743_10-21	BY4743	WT	a/α	2n	VI	146586	141543	SNP	1	T	A	2	A/T	51.5/48.5	69/65	134	A	51.4925	69	T	48.5075	65	AACCAGGAGCTGACATTTAA	AGGGAACAAGTCGGAAGGAT	AACCAGGAGCTGACATTTAA	AGGGAACAAGTCGGAAGGAT
BY4743_10-21	BY4743	WT	a/α	2n	VI	199164	194121	SNP	1	A	T	1	T	78.8	104	132	T	78.7879	104				TGCAATGTTTGGCGTGCGGC	GTATAAGTTCAAAAAAATCC	TGCAATGTTTGGCGTGCGGC	GTATAAGTTCAAAAAAATCC
BY4743_10-21	BY4743	WT	a/α	2n	VII	73305	73310	SNP	1	A	G	2	G/A	52.4/47.6	65/59	124	G	52.4194	65	A	47.5806	59	AAGAGAAGACCACCCAAAAG	TATCATTTCAACATAGGTAG	AAGAGAAGACCACCCAAAAG	TATCATTTCAACATAGGTAG
BY4743_10-21	BY4743	WT	a/α	2n	VII	104282	104287	SNP	1	A	T	2	A/T	52.1/47.9	61/56	117	A	52.1368	61	T	47.8632	56	ATGTTTGTCATAGATTTCAA	AGCTTCCTCCTTCAAATCAT	ATGTTTGTCATAGATTTCAA	AGCTTCCTCCTTCAAATCAT
BY4743_10-21	BY4743	WT	a/α	2n	VII	412337	412343	SNP	1	C	T	2	T/C	51.4/48.6	56/53	109	T	51.3761	56	C	48.6239	53	GGGACGTTCTGCGTGTTAAG	AGATGCCATAACCGACTAGA	GGGACGTTCTGCGTGTTAAG	AGATGCCATAACCGACTAGA
BY4743_10-21	BY4743	WT	a/α	2n	VII	916896	902363	SNP	1	G	T	1	T	55.7	54	97	T	55.6701	54				TACAGCATTTTTTGGCTCCT	CTTCATATCTTTTTTTTTAG	TACAGCATTTTTTGGCTCCT	CTTCATATCTTTTTTTTTAG
BY4743_10-21	BY4743	WT	a/α	2n	VII	1020058	1005525	SNP	1	C	T	1	T	68.9	91	132	T	68.9394	91				GGTCGAATTTTGGAACAACA	CATTATATTTGGCATTAACA	GGTCGAATTTTGGAACAACA	CATTATATTTGGCATTAACA
BY4743_10-21	BY4743	WT	a/α	2n	VII	1020805	1006272	SNP	1	C	A	1	A	73.3	99	135	A	73.3333	99				ACAGGGCACCACATTTGTCA	ATTGATCCCCACGAGCATCA	ACAGGGCACCACATTTGTCA	ATTGATCCCCACGAGCATCA
BY4743_10-21	BY4743	WT	a/α	2n	VIII	157419	155199	SNP	1	T	A	2	A/T	53.8/46.2	64/55	119	A	53.7815	64	T	46.2185	55	ATAGGCTCGAAAAATATTGA	AGTAACAATGCACAGAGTAA	ATAGGCTCGAAAAATATTGA	AGTAACAATGCACAGAGTAA
BY4743_10-21	BY4743	WT	a/α	2n	VIII	254764	251071	SNP	1	T	C	2	T/C	51.6/48.4	48/45	93	T	51.6129	48	C	48.3871	45	TCCCAAAGTAATTGCAGATG	CTTGAACCTAATGAATATTG	TCCCAAAGTAATTGCAGATG	CTTGAACCTAATGAATATTG
BY4743_10-21	BY4743	WT	a/α	2n	IX	187822	172363	SNP	1	G	A	2	G/A	52.9/47.1	27/24	51	G	52.9412	27	A	47.0588	24	TTTTTCCACGGGAAAAAAGT	AAAAAAAAAAAAAAAAAAAA	TTTTTCCACGGGAAAAAAGT	AAAAAAAAAAAAAAAAAAAA
BY4743_10-21	BY4743	WT	a/α	2n	X	136911	123585	SNP	1	G	A	2	A/G	50.0/50.0	24/24	48	A	50	24	G	50	24	TTTTCCCCCGTTCCCAAAAA	AAAAAAAAAAAAAAAAAAAG	TTTTCCCCCGTTCCCAAAAA	AAAAAAAAAAAAAAAAAAAG
BY4743_10-21	BY4743	WT	a/α	2n	X	424928	411602	SNP	1	G	T	2	G/T	51.2/48.8	22/21	43	G	51.1628	22	T	48.8372	21	TTTTTTTTTTTTTTTTTTTT	TATTTTGGAAGGAAAGCAGG	TTTTTTTTTTTTTTTTTTTT	TATTTTGGAAGGAAAGCAGG
BY4743_10-21	BY4743	WT	a/α	2n	X	424930	411604	SNP	1	A	T	2	A/T	53.3/46.7	24/21	45	A	53.3333	24	T	46.6667	21	TTTTTTTTTTTTTTTTTTGT	TTTTGGAAGGAAAGCAGGGG	TTTTTTTTTTTTTTTTTTTT	TTTTGGAAGGAAAGCAGGGG
BY4743_10-21	BY4743	WT	a/α	2n	X	460013	446687	SNP	1	C	A	2	A/C	51.8/48.2	43/40	83	A	51.8072	43	C	48.1928	40	ATTGGGTTTGTCTAATGATC	TTGATGAGATTGATGCTGCA	ATTGGGTTTGTCTAATGATC	TTGATGAGATTGATGCTGCA
BY4743_10-21	BY4743	WT	a/α	2n	X	468615	455289	SNP	1	C	A	2	C/A	53.2/46.8	58/51	109	C	53.211	58	A	46.789	51	CAGGGAATAATGGTCCTGGC	GCACGCTTCAGCCGATGGCT	CAGGGAATAATGGTCCTGGC	GCACGCTTCAGCCGATGGCT
BY4743_10-21	BY4743	WT	a/α	2n	X	667828	649448	SNP	1	T	A	1	A	78.8	89	113	A	78.7611	89				GCATGGCTGGGGATACGATG	GTATGGACCTATTGAGCACA	GCATGGCTGGGGATACGATG	GTATGGACCTATTGAGCACA
BY4743_10-21	BY4743	WT	a/α	2n	X	725064	706597	SNP	1	G	A	1	A	64	71	111	A	63.964	71				CGTTTAAAATTTTACCGATT	CAGTGACAGAAAAGCTAGTT	CGTTTAAAATTTTACCGATT	CAGTGACAGAAAAGCTAGTT
BY4743_10-21	BY4743	WT	a/α	2n	XI	231730	231734	SNP	1	G	T	2	T/G	52.0/48.0	53/49	102	T	51.9608	53	G	48.0392	49	GCTTCCAAGTGTCATGTATC	ATTTTGCAGATTGTTCTAAA	GCTTCCAAGTGTCATGTATC	ATTTTGCAGATTGTTCTAAA
BY4743_10-21	BY4743	WT	a/α	2n	XII	110462	104225	SNP	1	T	C	2	C/T	50.5/49.5	47/46	93	C	50.5376	47	T	49.4624	46	CTCAATTTCATGAGCAAATC	CTTGGGCAATTCACTGAAAA	CTCAATTTCATGAGCAAATC	CTTGGGCAATTCACTGAAAA
BY4743_10-21	BY4743	WT	a/α	2n	XII	448693	438982	SNP	1	G	A	1	A	85.3	64	75	A	85.3333	64				GGGTTGTCCGGATCAAAACC	AAAGTGATAACCACTACACT	GGGTTGTCCGGATCAAAACC	AAAGTGATAACCACTACACT
BY4743_10-21	BY4743	WT	a/α	2n	XII	910654	863414	SNP	1	T	C	2	C/T	50.9/49.1	54/52	106	C	50.9434	54	T	49.0566	52	CATCTGAACCAGTCTCATTG	CAAGGGCACTACACCACTGT	CATCTGAACCAGTCTCATTG	CAAGGGCACTACACCACTGT
BY4743_10-21	BY4743	WT	a/α	2n	XII	963087	914945	SNP	1	T	C	1	C	99	102	103	C	99.0291	102				AACAACAAGGAAATACAGGA	ACGAACACCATCCAGTTTAA	AACAACAAGGAAATACAGGA	ACGAACACCATCCAGTTTAA
BY4743_10-21	BY4743	WT	a/α	2n	XIV	439433	433645	SNP	1	C	A	2	A/C	52.3/47.7	58/53	111	A	52.2523	58	C	47.7477	53	GGCAACCATATGATATTGCC	AAAGTTTCCAATGTTAACAA	GGCAACCATATGATATTGCC	AAAGTTTCCAATGTTAACAA
BY4743_10-21	BY4743	WT	a/α	2n	XV	245746	242605	SNP	1	C	T	1	T	71.2	74	104	T	71.1538	74				AATGACAACAATAACTATGA	GATGACATGACAATGGTTGA	AATGACAACAATAACTATGA	GATGACATGACAATGGTTGA
BY4743_10-21	BY4743	WT	a/α	2n	XV	429913	426772	SNP	1	A	G	1	G	60.3	35	58	G	60.3448	35				CTTTCTGGTCTCTTCTTTGA	CTAAAGTAATCTTATAAAAG	CTTTCTGGTCTCTTCTTTGA	CTAAAGTAATCTTATAAAAG
BY4743_10-21	BY4743	WT	a/α	2n	XV	654110	647376	SNP	1	T	G	1	G	96.7	58	60	G	96.6667	58				ACCCATGGTTTACAAGGCGA	AAAATGACAAATGCCAGGTG	ACCCATGGTTTACAAGGCGA	AAAATGACAAATGCCAGGTG
BY4743_10-21	BY4743	WT	a/α	2n	XVI	106260	94040	SNP	1	A	G	1	G	56.7	51	90	G	56.6667	51				TCATGATATCTTGGAAGAAA	AACTGATTTGCATCTACCGA	TCATGATATCTTGGAAGAAA	AACTGATTTGCATCTACCGA
BY4743_10-21	BY4743	WT	a/α	2n	XVI	202934	190710	SNP	1	A	T	1	T	65.4	51	78	T	65.3846	51				CAATTTTCAATTTTTGATAG	TGTTCGTCACTAATATTTTT	CAATTTTCAATTTTTGATAG	TGTTCGTCACTAATATTTTT
BY4743_10-21	BY4743	WT	a/α	2n	XVI	636416	620350	SNP	1	A	C	1	C	75.3	64	85	C	75.2941	64				GGCAACTATTCCAAAAATGC	GAATTTAAGTAAAGGCCTTT	GGCAACTATTCCAAAAATGC	GAATTTAAGTAAAGGCCTTT
BY4743_10-21	BY4743	WT	a/α	2n	XVI	678385	662319	SNP	1	C	A	1	A	62.2	46	74	A	62.1622	46				TTTGCCTATGGATGTTGTAC	ATGCCCATTCTGCTCAAGCT	TTTGCCTATGGATGTTGTAC	ATGCCCATTCTGCTCAAGCT
BY4743_10-21	BY4743	WT	a/α	2n	XVI	931956	907112	SNP	1	G	T	1	T	100	85	85	T	100	85				TGATACAAGAACCTCATACA	ACTTTCTTGTGAGGCTATTG	TGATACAAGAACCTCATACA	ACTTTCTTGTGAGGCTATTG
BY4743_10-22	BY4743	WT	a/α	2n	I	149210	149048	SNP	1	A	T	2	A/T	54.7/45.3	105/87	192	A	54.6875	105	T	45.3125	87	GTCCTCTCCAACAGTGGGCA	AAAAATAATTTTTCTTCCTG	GTCCTCTCCAACAGTGGGCA	AAAAATAATTTTTCTTCCTG
BY4743_10-22	BY4743	WT	a/α	2n	II	301084	297886	SNP	1	C	A	2	A/C	53.0/47.0	71/63	134	A	52.9851	71	C	47.0149	63	GACCAGCTGGCCAAGCTACT	AAAAGCGTACTCACGTTTTG	GACCAGCTGGCCAAGCTACT	AAAAGCGTACTCACGTTTTG
BY4743_10-22	BY4743	WT	a/α	2n	II	317097	313899	SNP	1	T	A	2	T/A	52.2/47.8	72/66	138	T	52.1739	72	A	47.8261	66	GTTACAACCCGTCAAATCAG	CAACATTTCTAGTGAAGTAT	GTTACAACCCGTCAAATCAG	CAACATTTCTAGTGAAGTAT
BY4743_10-22	BY4743	WT	a/α	2n	II	535180	531981	SNP	1	C	T	1	T	59.1	81	137	T	59.1241	81				TTAATAATGTCGACTGGAAA	TGAAACCAGGAGGAGTAGAA	TTAATAATGTCGACTGGAAA	TGAAACCAGGAGGAGTAGAA
BY4743_10-22	BY4743	WT	a/α	2n	II	568034	564835	SNP	1	T	C	2	C/T	52.8/47.2	75/67	142	C	52.8169	75	T	47.1831	67	CTGGCACTTAATGCACCCGG	TGGTCTTGTTTATTTGCAAA	CTGGCACTTAATGCACCCGG	TGGTCTTGTTTATTTGCAAA
BY4743_10-22	BY4743	WT	a/α	2n	II	705775	702576	SNP	1	G	T	2	T/G	51.6/48.4	65/61	126	T	51.5873	65	G	48.4127	61	CGTCTTTTTCATTAAATTTA	GTAACCTATGTCTCGGGCAG	CGTCTTTTTCATTAAATTTA	GTAACCTATGTCTCGGGCAG
BY4743_10-22	BY4743	WT	a/α	2n	II	762610	759405	SNP	1	A	T	2	A/T	50.0/50.0	80/80	160	A	50	80	T	50	80	AATAGAATATTGAGAAGTGA	GGGAGATTGATTTTAAACCT	AATAGAATATTGAGAAGTGA	GGGAGATTGATTTTAAACCT
BY4743_10-22	BY4743	WT	a/α	2n	II	781784	778579	SNP	1	A	G	2	A/G	53.9/46.1	82/70	152	A	53.9474	82	G	46.0526	70	GGCGTTCACAACACAGTAGC	GCAGGAAATGCTTCATCGTT	GGCGTTCACAACACAGTAGC	GCAGGAAATGCTTCATCGTT
BY4743_10-22	BY4743	WT	a/α	2n	II	813176	808244	SNP	1	T	G	1	G	87	20	23	G	86.9565	20				GTGTGTGTGGGTGTGGTGTG	GGGTGTGT	GTGTGTGTGGGTGTGGTGTG	GTGTGTGT
BY4743_10-22	BY4743	WT	a/α	2n	II	813178	808246	SNP	1	G	T	1	T	66.7	10	15	T	66.6667	10				GTGTGTGGGTGTGGTGTGTG	GTGTGT	GTGTGTGGGTGTGGTGTGGG	GTGTGT
BY4743_10-22	BY4743	WT	a/α	2n	III	146205	138533	SNP	1	T	A	2	A/T	53.7/46.3	79/68	147	A	53.7415	79	T	46.2585	68	AATAAATAGTAGTAGAAGAA	CCGTCAATAACTGATGAATT	AATAAATAGTAGTAGAAGAA	CCGTCAATAACTGATGAATT
BY4743_10-22	BY4743	WT	a/α	2n	IV	57657	55485	SNP	1	T	C	1	C	66.8	127	190	C	66.8421	127				GGTGTCTTTAAATCCGTATG	TGGGACATGTGGGTCAATCA	GGTGTCTTTAAATCCGTATG	TGGGACATGTGGGTCAATCA
BY4743_10-22	BY4743	WT	a/α	2n	IV	580464	571797	SNP	1	C	G	1	G	65.1	110	169	G	65.0888	110				GTCAACTAGAGTGTTTAAAT	ATTTATTTCATTATTTTATA	GTCAACTAGAGTGTTTAAAT	ATTTATTTCATTATTTTATA
BY4743_10-22	BY4743	WT	a/α	2n	V	182679	181578	SNP	1	C	T	2	T/C	52.7/47.3	89/80	169	T	52.6627	89	C	47.3373	80	CGTTTCTGGACTATGTTTTA	TTATTTTTTAAGCAAGTTGA	CGTTTCTGGACTATGTTTTA	TTATTTTTTAAGCAAGTTGA
BY4743_10-22	BY4743	WT	a/α	2n	V	205262	204161	SNP	1	A	T	2	A/T	55.0/45.0	83/68	151	A	54.9669	83	T	45.0331	68	GAGGTAGACATGAGTGACTT	CAAGACCAAGAACCTAGCAT	GAGGTAGACATGAGTGACTT	CAAGACCAAGAACCTAGCAT
BY4743_10-22	BY4743	WT	a/α	2n	V	280653	279551	SNP	1	C	T	1	T	56.7	76	134	T	56.7164	76				AACAAAGCGGCGTTAACTTT	AAAGATAGAGGTTTAGTAGT	AACAAAGCGGCGTTAACTTT	AAAGATAGAGGTTTAGTAGT
BY4743_10-22	BY4743	WT	a/α	2n	V	505852	496785	SNP	1	G	T	2	G/T	54.8/45.2	108/89	197	G	54.8223	108	T	45.1777	89	AGAATCTGAAGATGACTATG	TTCCGAGGAGGCTTTATCAG	AGAATCTGAAGATGACTATG	TTCCGAGGAGGCTTTATCAG
BY4743_10-22	BY4743	WT	a/α	2n	V	559516	550449	SNP	1	C	A	2	C/A	51.7/48.3	89/83	172	C	51.7442	89	A	48.2558	83	CCAAGTAAAGCGGCTGCAAT	GTATTTGTCGTACTCTTCAT	CCAAGTAAAGCGGCTGCAAT	GTATTTGTCGTACTCTTCAT
BY4743_10-22	BY4743	WT	a/α	2n	VII	295879	295884	SNP	1	A	G	2	G/A	53.5/46.5	53/46	99	G	53.5354	53	A	46.4646	46	AACAGGCAGAAGCCTCATTC	TAACTGCTGAAGGGTTAAGA	AACAGGCAGAAGCCTCATTC	TAACTGCTGAAGGGTTAAGA
BY4743_10-22	BY4743	WT	a/α	2n	VII	367212	367217	SNP	1	T	C	2	C/T	51.3/48.7	60/57	117	C	51.2821	60	T	48.7179	57	GGAAATAAAATTCTTGAAAG	CCCATCACCATCAGTGGTTG	GGAAATAAAATTCTTGAAAG	CCCATCACCATCAGTGGTTG
BY4743_10-22	BY4743	WT	a/α	2n	VII	560894	558296	SNP	1	T	C	2	T/C	53.5/46.5	69/60	129	T	53.4884	69	C	46.5116	60	GATGAAAATGACCAGCAACT	CTACCAAATATGAATGCTAC	GATGAAAATGACCAGCAACT	CTACCAAATATGAATGCTAC
BY4743_10-22	BY4743	WT	a/α	2n	VII	574522	566156	SNP	1	T	C	1	C	55.2	64	116	C	55.1724	64				CAATTCTATAAATATTATTA	CATCATTTTATATGTTAATA	CAATTCTATAAATATTATTA	CATCATTTTATATGTTAATA
BY4743_10-22	BY4743	WT	a/α	2n	VII	697543	689177	SNP	1	T	A	2	T/A	51.9/48.1	56/52	108	T	51.8519	56	A	48.1481	52	TAGTTCCTTTTTTAAGTTCA	CAAGGCAGTCTCTGTATAGT	TAGTTCCTTTTTTAAGTTCA	CAAGGCAGTCTCTGTATAGT
BY4743_10-22	BY4743	WT	a/α	2n	VII	729532	721166	SNP	1	T	C	2	T/C	54.4/45.6	62/52	114	T	54.386	62	C	45.614	52	CGGTAGTAGCCGTCCCAGAA	TTGGCTGGCTGCCCCCAAAA	CGGTAGTAGCCGTCCCAGAA	TTGGCTGGCTGCCCCCAAAA
BY4743_10-22	BY4743	WT	a/α	2n	VII	892985	878359	SNP	1	C	G	1	G	98.5	130	132	G	98.4848	130				GCCAAAGGCGGGGGTGAAAT	GATCCTAAAAATTGCAGATA	GCCAAAGGCGGGGGTGAAAT	GATCCTAAAAATTGCAGATA
BY4743_10-22	BY4743	WT	a/α	2n	VIII	539806	533132	SNP	1	T	C	2	T/C	53.5/46.5	68/59	127	T	53.5433	68	C	46.4567	59	TTCTGTAGTTTCTTCCTCAG	CATGTCTTCCTCGGTCATTT	TTCTGTAGTTTCTTCCTCAG	CATGTCTTCCTCGGTCATTT
BY4743_10-22	BY4743	WT	a/α	2n	X	57470	43566	SNP	1	G	C	2	C/G	51.1/48.9	92/88	180	C	51.1111	92	G	48.8889	88	CATTGTCCGATACAAGGGCC	CATGCATTTGCTAAAACTTT	CATTGTCCGATACAAGGGCC	CATGCATTTGCTAAAACTTT
BY4743_10-22	BY4743	WT	a/α	2n	X	745602	721079	SNP	1	A	G	1	G	57.9	92	159	G	57.8616	92				AATGGAGGGTACGTTAAGAG	CAGGTTTATCAGGGTTGGAT	AATGGAGGGTACGTTAAGAG	CAGGTTTATCAGGGTTGGAT
BY4743_10-22	BY4743	WT	a/α	2n	XI	69071	69075	SNP	1	A	T	2	A/T	51.7/48.3	75/70	145	A	51.7241	75	T	48.2759	70	GTGCTTCTTGGAGTCGTAGA	CATGACCTCCGGGGGAGCAT	GTGCTTCTTGGAGTCGTAGA	CATGACCTCCGGGGGAGCAT
BY4743_10-22	BY4743	WT	a/α	2n	XI	452597	452595	SNP	1	T	C	2	T/C	53.8/46.2	85/73	158	T	53.7975	85	C	46.2025	73	TGACAAAGAATTGTCAAGCT	ACAATGAATATGACAGTTTG	TGACAAAGAATTGTCAAGCT	ACAATGAATATGACAGTTTG
BY4743_10-22	BY4743	WT	a/α	2n	XI	452598	452596	SNP	1	A	T	2	A/T	54.4/45.6	86/72	158	A	54.4304	86	T	45.5696	72	GACAAAGAATTGTCAAGCTT	CAATGAATATGACAGTTTGA	GACAAAGAATTGTCAAGCTT	CAATGAATATGACAGTTTGA
BY4743_10-22	BY4743	WT	a/α	2n	XI	616607	616607	SNP	1	A	T	2	A/T	52.5/47.5	74/67	141	A	52.4823	74	T	47.5177	67	CACTTTGATTTTTGGTAAAA	GCAATACATTCAAAGACCAA	CACTTTGATTTTTGGTAAAA	GCAATACATTCAAAGACCAA
BY4743_10-22	BY4743	WT	a/α	2n	XI	620049	620049	SNP	1	A	G	2	A/G	52.4/47.6	66/60	126	A	52.381	66	G	47.619	60	AAAGAAAATTGATGGTTTGA	GACAGAAATGGAAAACGTTA	AAAGAAAATTGATGGTTTGA	GACAGAAATGGAAAACGTTA
BY4743_10-22	BY4743	WT	a/α	2n	XII	47257	40899	SNP	1	T	C	2	C/T	52.3/47.7	67/61	128	C	52.3438	67	T	47.6562	61	AGCGGTTTCTTGAGTGGCTT	TTCTTTAGCATATTTATTGT	AGCGGTTTCTTGAGTGGCTT	TTCTTTAGCATATTTATTGT
BY4743_10-22	BY4743	WT	a/α	2n	XII	63200	56842	SNP	1	G	T	2	T/G	51.9/48.1	69/64	133	T	51.8797	69	G	48.1203	64	CTATGATCTTTGTAGTCAAA	ACTGCATAAACCCGGCGTTA	CTATGATCTTTGTAGTCAAA	ACTGCATAAACCCGGCGTTA
BY4743_10-22	BY4743	WT	a/α	2n	XII	114313	107955	SNP	1	C	T	2	T/C	53.0/47.0	79/70	149	T	53.0201	79	C	46.9799	70	TTTGATGTGCTTAAACTAGC	ATTGAGTTCGTGAATCAATT	TTTGATGTGCTTAAACTAGC	ATTGAGTTCGTGAATCAATT
BY4743_10-22	BY4743	WT	a/α	2n	XII	115317	108959	SNP	1	A	T	2	A/T	54.0/46.0	68/58	126	A	53.9683	68	T	46.0317	58	GCGCGCCAAGCTACTCTCTC	TTTTATTTTTATCGCAGAAT	GCGCGCCAAGCTACTCTCTC	TTTTATTTTTATCGCAGAAT
BY4743_10-22	BY4743	WT	a/α	2n	XII	124590	118232	SNP	1	C	A	2	C/A	50.4/49.6	70/69	139	C	50.3597	70	A	49.6403	69	TTTGCTGTGATCCAGCAGCA	CGCCGTTCACAATGCCGGCC	TTTGCTGTGATCCAGCAGCA	CGCCGTTCACAATGCCGGCC
BY4743_10-22	BY4743	WT	a/α	2n	XII	133733	127375	SNP	1	C	A	2	A/C	50.0/50.0	62/62	124	A	50	62	C	50	62	TGAAGCATAAAAAGGAAATC	AGGCAAGACCAAGAAGGACA	TGAAGCATAAAAAGGAAATC	AGGCAAGACCAAGAAGGACA
BY4743_10-22	BY4743	WT	a/α	2n	XII	214963	208604	SNP	1	C	T	2	T/C	54.1/45.9	66/56	122	T	54.0984	66	C	45.9016	56	GCGCCATGTGCCCTAAAACG	GTACAAAGGAGAGGAAATTA	GCGCCATGTGCCCTAAAACG	GTACAAAGGAGAGGAAATTA
BY4743_10-22	BY4743	WT	a/α	2n	XII	371952	362350	SNP	1	G	A	2	G/A	52.2/47.8	47/43	90	G	52.2222	47	A	47.7778	43	ACAGATTTACATAGACTCTT	CAAACAAGACCCTTGGAAAA	ACAGATTTACATAGACTCTT	CAAACAAGACCCTTGGAAAA
BY4743_10-22	BY4743	WT	a/α	2n	XII	410085	400483	SNP	1	T	G	2	T/G	53.3/46.7	48/42	90	T	53.3333	48	G	46.6667	42	GATTATATGGCTTATGGTCG	GACAAGATTGCGGTCTTTTG	GATTATATGGCTTATGGTCG	GACAAGATTGCGGTCTTTTG
BY4743_10-22	BY4743	WT	a/α	2n	XII	437383	427781	SNP	1	A	C	2	C/A	50.6/49.4	45/44	89	C	50.5618	45	A	49.4382	44	TTGATGAAACAGAATTAGCC	AATGGAATGAATAGTAGTAT	TTGATGAAACAGAATTAGCC	AATGGAATGAATAGTAGTAT
BY4743_10-22	BY4743	WT	a/α	2n	XII	818679	772269	SNP	1	C	T	2	C/T	52.3/47.7	58/53	111	C	52.2523	58	T	47.7477	53	GGTTCGAGTCCCGGGAGGAG	TTTTAATTTTTTAGCGCACT	GGTTCGAGTCCCGGGAGGAG	TTTTAATTTTTTAGCGCACT
BY4743_10-22	BY4743	WT	a/α	2n	XII	1036900	988689	SNP	1	T	A	1	A	100	130	130	A	100	130				CAGTGCTAGTAAAGTCAGTT	TATCAGAAATCACAATATCT	CAGTGCTAGTAAAGTCAGTT	TATCAGAAATCACAATATCT
BY4743_10-22	BY4743	WT	a/α	2n	XIII	713439	697781	SNP	1	C	A	2	C/A	54.3/45.7	75/63	138	C	54.3478	75	A	45.6522	63	TGGTGCCGATATCGAACCTC	CGTACAAACTAGCTTATTGG	TGGTGCCGATATCGAACCTC	CGTACAAACTAGCTTATTGG
BY4743_10-22	BY4743	WT	a/α	2n	XIV	181855	176407	SNP	1	G	T	2	G/T	52.9/47.1	72/64	136	G	52.9412	72	T	47.0588	64	TTTGGTCATTTGTGAAGGTT	TGTCAAAGAGTCCAATTTCT	TTTGGTCATTTGTGAAGGTT	TGTCAAAGAGTCCAATTTCT
BY4743_10-22	BY4743	WT	a/α	2n	XIV	344932	339481	SNP	1	C	A	2	A/C	54.7/45.3	64/53	117	A	54.7009	64	C	45.2991	53	GTCCGATATTCGTCCTTTAG	TGTGGGGCTTCTGTTTTTCT	GTCCGATATTCGTCCTTTAG	TGTGGGGCTTCTGTTTTTCT
BY4743_10-22	BY4743	WT	a/α	2n	XIV	361220	355769	SNP	1	A	T	2	A/T	54.0/46.0	75/64	139	A	53.9568	75	T	46.0432	64	TTGAAATGGCTTTTCAGGAA	CCGTAATTGTGAACGTTGTG	TTGAAATGGCTTTTCAGGAA	CCGTAATTGTGAACGTTGTG
BY4743_10-22	BY4743	WT	a/α	2n	XIV	369886	364435	SNP	1	C	A	2	C/A	54.2/45.8	71/60	131	C	54.1985	71	A	45.8015	60	TCTTTTCTGTCAAATGTTCA	CATGATAAGCTCGGGTTTCC	TCTTTTCTGTCAAATGTTCA	CATGATAAGCTCGGGTTTCC
BY4743_10-22	BY4743	WT	a/α	2n	XIV	402672	397221	SNP	1	T	A	2	T/A	50.3/49.7	80/79	159	T	50.3145	80	A	49.6855	79	TCACTTCCTATGCAAAATGC	TAATAATTCATTAGACCCTG	TCACTTCCTATGCAAAATGC	TAATAATTCATTAGACCCTG
BY4743_10-22	BY4743	WT	a/α	2n	XIV	428351	422900	SNP	1	C	T	2	T/C	53.0/47.0	71/63	134	T	52.9851	71	C	47.0149	63	CTTGACTCAAAGAAGGAATA	TTTCCTAACTTCCCAATACG	CTTGACTCAAAGAAGGAATA	TTTCCTAACTTCCCAATACG
BY4743_10-22	BY4743	WT	a/α	2n	XIV	658378	652622	SNP	1	A	T	2	T/A	50.7/49.3	68/66	134	T	50.7463	68	A	49.2537	66	GGAGTAGAGAAAATGGCAGA	ACTTTAGAAGATAACTTGCA	GGAGTAGAGAAAATGGCAGA	ACTTTAGAAGATAACTTGCA
BY4743_10-22	BY4743	WT	a/α	2n	XV	48975	48975	SNP	1	A	G	1	G	56.1	92	164	G	56.0976	92				AAAACAACCCAGGACGACCC	TAACGAAAAACACTAAACTA	AAAACAACCCAGGACGACCC	TAACGAAAAACACTAAACTA
BY4743_10-22	BY4743	WT	a/α	2n	XV	357950	354743	SNP	1	A	G	2	G/A	50.4/49.6	65/64	129	G	50.3876	65	A	49.6124	64	GCTCTACATCAAAAACAAAA	CAGCGACGACCCCTTCTTCC	GCTCTACATCAAAAACAAAA	CAGCGACGACCCCTTCTTCC
BY4743_10-22	BY4743	WT	a/α	2n	XV	755715	747974	SNP	1	A	T	2	A/T	52.6/47.4	51/46	97	A	52.5773	51	T	47.4227	46	GCAACAAACCGCTCTTATCT	TTAATACAGATCCAGGAGTC	GCAACAAACCGCTCTTATCT	TTAATACAGATCCAGGAGTC
BY4743_10-22	BY4743	WT	a/α	2n	XV	797597	789856	SNP	1	T	C	2	C/T	53.0/47.0	53/47	100	C	53	53	T	47	47	CCTTGTTTTTTTTTTATTGT	TCAATTACACTACATAATTA	CCTTGTTTTTTTTTTATTGT	TCAATTACACTACATAATTA
BY4743_10-22	BY4743	WT	a/α	2n	XVI	210247	197894	SNP	1	C	T	2	C/T	50.3/49.7	75/74	149	C	50.3356	75	T	49.6644	74	TGAAAGCGTGATGTGATAGC	GTTACACTATATCGGACAAT	TGAAAGCGTGATGTGATAGC	GTTACACTATATCGGACAAT
BY4743_10-22	BY4743	WT	a/α	2n	XVI	300588	288235	SNP	1	T	C	2	T/C	54.0/46.0	81/69	150	T	54	81	C	46	69	GAATTCGAGACTCTTCCTTT	CTTGATCTTGTTTATCCCCT	GAATTCGAGACTCTTCCTTT	CTTGATCTTGTTTATCCCCT
BY4743_10-22	BY4743	WT	a/α	2n	XVI	787723	772064	SNP	1	G	A	2	G/A	51.5/48.5	67/63	130	G	51.5385	67	A	48.4615	63	CTTGCCTTCATCGAGTTACC	TTGTCTCCCACGTTTCTTTT	CTTGCCTTCATCGAGTTACC	TTGTCTCCCACGTTTCTTTT
BY4743_10-22	BY4743	WT	a/α	2n	VII	22	25	DIP	1	-	A	2	-/A	52.2/46.7	48/43	92	-	52.1739	48	A	46.7391	43	CACACCCACACACACCACAC	CCACACCCACACACTACCCT	ACCCACACCACACACCACAC	CACACCCACACACTACCCTA
BY4743_10-22	BY4743	WT	a/α	2n	XVI	643571	627912	DIP	1	T	-	2	T/-	51.0/46.9	50/46	98	T	51.0204	50	-	46.9388	46	TGCGACAGTCGAATTTTTTC	TTTTTTTTTTTCTGCAAAGC	TGCGACAGTCGAATTTTTTC	TTTTTTTTTTCTGCAAAGCG
BY4743_10-23	BY4743	WT	a/α	2n	II	42515	40865	SNP	1	C	T	2	C/T	52.8/46.6	94/83	178	C	52.809	94	T	46.6292	83	TGCAGATGAGCACTTTTGGG	GGATAATTACGAAAGGAAAG	TGCAGATGAGCACTTTTGGG	GGATAATTACGAAAGGAAAG
BY4743_10-23	BY4743	WT	a/α	2n	II	504381	501672	SNP	1	T	C	2	C/T	49.8/49.8	100/100	201	C	49.7512	100	T	49.7512	100	ACACACACACACACACGCTT	CACACACGCAATTTGAAATA	ACACACACACACACACGCTT	CACACACGCAATTTGAAATA
BY4743_10-23	BY4743	WT	a/α	2n	II	592184	589475	SNP	1	T	C	2	C/T	50.8/49.2	98/95	193	C	50.7772	98	T	49.2228	95	TTGGTCTGTAACAAGAAACG	TCTTGGTCAACAACAACTTG	TTGGTCTGTAACAAGAAACG	TCTTGGTCAACAACAACTTG
BY4743_10-23	BY4743	WT	a/α	2n	III	236338	226206	SNP	1	T	C	2	T/C	54.5/45.5	103/86	189	T	54.4974	103	C	45.5026	86	CTCATTATTATGCTAGTTTT	CTAAGTTTAAAAGGAGAGAA	CTCATTATTATGCTAGTTTT	CTAAGTTTAAAAGGAGAGAA
BY4743_10-23	BY4743	WT	a/α	2n	IV	323108	321490	SNP	1	A	T	2	A/T	49.7/49.7	98/98	197	A	49.7462	98	T	49.7462	98	TTCATTGAAGCGGGGCACTC	GATCAATTTTTATCAATGAT	TTCATTGAAGCGGGGCACTC	GATCAATTTTTATCAATGAT
BY4743_10-23	BY4743	WT	a/α	2n	IV	371802	370186	SNP	1	C	T	2	T/C	52.7/47.3	89/80	169	T	52.6627	89	C	47.3373	80	GATCCGTGTTTATTTCCCTT	TCGTTCCATGTATTCTTTTC	GATCCGTGTTTATTTCCCTT	TCGTTCCATGTATTCTTTTC
BY4743_10-23	BY4743	WT	a/α	2n	IV	620045	610903	SNP	1	G	A	2	A/G	51.8/48.2	71/66	137	A	51.8248	71	G	48.1752	66	CATTGGGCCACGAGGAACAA	ATTTCTTGAAGTTATTGAAA	CATTGGGCCACGAGGAACAA	ATTTCTTGAAGTTATTGAAA
BY4743_10-23	BY4743	WT	a/α	2n	IV	621879	612737	SNP	1	G	A	2	G/A	52.7/47.3	29/26	55	G	52.7273	29	A	47.2727	26	AAGAGTCAAAACTGAACCAA	AAAAAAAAAAAAAAAAAAAC	AAGAGTCAAAACTGAACCAA	AAAAAAAAAAAAAAAAAAAC
BY4743_10-23	BY4743	WT	a/α	2n	V	144600	143488	SNP	1	T	A	2	T/A	50.2/49.8	116/115	231	T	50.2165	116	A	49.7835	115	TTGGTACATTTGCTACTATT	TCAAGGATGAAGGTGCTGCT	TTGGTACATTTGCTACTATT	TCAAGGATGAAGGTGCTGCT
BY4743_10-23	BY4743	WT	a/α	2n	VI	237887	233037	SNP	1	A	G	2	A/G	51.2/48.8	128/122	250	A	51.2	128	G	48.8	122	TTAGGCTTCATTCTGGAAAA	TAAAAACCACCCTTATGGAA	TTAGGCTTCATTCTGGAAAA	TAAAAACCACCCTTATGGAA
BY4743_10-23	BY4743	WT	a/α	2n	VII	275175	275180	SNP	1	G	C	2	C/G	52.3/47.7	91/83	174	C	52.2989	91	G	47.7011	83	TAGCCCCTGTGAAGAATCCA	TGCGATGTTACTGTTGACTT	TAGCCCCTGTGAAGAATCCA	TGCGATGTTACTGTTGACTT
BY4743_10-23	BY4743	WT	a/α	2n	VII	628891	622086	SNP	1	T	C	2	T/C	50.7/49.3	77/75	152	T	50.6579	77	C	49.3421	75	CATCAGTCGCAGAGTTCTAC	TCAATTGCCAACACATTTTC	CATCAGTCGCAGAGTTCTAC	TCAATTGCCAACACATTTTC
BY4743_10-23	BY4743	WT	a/α	2n	VII	930997	918476	SNP	1	T	C	2	T/C	50.7/49.3	110/107	217	T	50.6912	110	C	49.3088	107	GGGCCCAACGATGGCAACGT	GGATTTTACCACTAAACCAC	GGGCCCAACGATGGCAACGT	GGATTTTACCACTAAACCAC
BY4743_10-23	BY4743	WT	a/α	2n	VII	1058804	1046283	SNP	1	G	C	2	C/G	52.0/48.0	106/98	204	C	51.9608	106	G	48.0392	98	CAAGAAGAAGTCCAAATTGT	AATGAGGAAAAGTTTCTTTA	CAAGAAGAAGTCCAAATTGT	AATGAGGAAAAGTTTCTTTA
BY4743_10-23	BY4743	WT	a/α	2n	VII	1068638	1056117	SNP	1	T	C	2	T/C	51.5/48.5	121/114	235	T	51.4894	121	C	48.5106	114	GATCTGCTCTCTTTGAACCA	TCATGTTCGCTGGAACAGTG	GATCTGCTCTCTTTGAACCA	TCATGTTCGCTGGAACAGTG
BY4743_10-23	BY4743	WT	a/α	2n	VIII	57622	57626	SNP	1	A	T	2	T/A	54.1/45.9	120/102	222	T	54.0541	120	A	45.9459	102	TGGTAGTGATTCAGAGGAAA	ATTGACAAGCGATGGTATTT	TGGTAGTGATTCAGAGGAAA	ATTGACAAGCGATGGTATTT
BY4743_10-23	BY4743	WT	a/α	2n	IX	53038	37804	SNP	1	G	T	2	G/T	50.9/49.1	116/112	228	G	50.8772	116	T	49.1228	112	CTAAAGTGGCGTTCAAACGC	AGTCGTTAAAGGACCCATCA	CTAAAGTGGCGTTCAAACGC	AGTCGTTAAAGGACCCATCA
BY4743_10-23	BY4743	WT	a/α	2n	IX	147897	132666	SNP	1	T	C	2	C/T	51.7/47.9	125/116	242	C	51.6529	125	T	47.9339	116	ATATATGGGAACCTTACTAT	TGCCCGAATGGAGGTGTAAT	ATATATGGGAACCTTACTAT	TGCCCGAATGGAGGTGTAAT
BY4743_10-23	BY4743	WT	a/α	2n	IX	439429	424197	SNP	1	A	G	2	A/G	54.3/45.7	121/102	223	A	54.2601	121	G	45.7399	102	TTGAGAGTGGTATATACTGT	GCATCCGTGTGCGTATGCCC	TTGAGAGTGGTATATACTGT	GCATCCGTGTGCGTATGCCC
BY4743_10-23	BY4743	WT	a/α	2n	XI	240794	240798	SNP	1	T	A	2	T/A	53.9/46.1	104/89	193	T	53.886	104	A	46.114	89	CATTGTCTTTGTCATCATCA	CGTCCTTGTCATTGTTGGGT	CATTGTCTTTGTCATCATCA	CGTCCTTGTCATTGTTGGGT
BY4743_10-23	BY4743	WT	a/α	2n	XI	324504	324508	SNP	1	A	C	2	C/A	54.7/45.3	93/77	170	C	54.7059	93	A	45.2941	77	GCTAAATTACAATAGCTTAG	TGCAACCACAATGTCGGCAT	GCTAAATTACAATAGCTTAG	TGCAACCACAATGTCGGCAT
BY4743_10-23	BY4743	WT	a/α	2n	XI	462911	462909	SNP	1	G	A	2	G/A	54.5/45.5	115/96	211	G	54.5024	115	A	45.4976	96	ACGCCACTCATGCCTTAAAA	GCCGGGTAATGATTTATAGT	ACGCCACTCATGCCTTAAAA	GCCGGGTAATGATTTATAGT
BY4743_10-23	BY4743	WT	a/α	2n	XII	30076	23922	SNP	1	A	G	2	G/A	52.7/47.3	108/97	205	G	52.6829	108	A	47.3171	97	AGGTTGAACAAAACATCAAG	GAAAATAAAAAAGAAAATAT	AGGTTGAACAAAACATCAAG	GAAAATAAAAAAGAAAATAT
BY4743_10-23	BY4743	WT	a/α	2n	XII	402856	394055	SNP	1	T	C	2	C/T	51.7/48.3	74/69	143	C	51.7483	74	T	48.2517	69	ACACATGATGAGATATGCAC	AAGCATTTTTTTGAGGCCAT	ACACATGATGAGATATGCAC	AAGCATTTTTTTGAGGCCAT
BY4743_10-23	BY4743	WT	a/α	2n	XII	450078	441277	SNP	1	T	C	1	C	60.8	48	79	C	60.7595	48				ACAAACAGTTTCCATATAAT	AGGAGCAGTCTACAATCAAG	ACAAACAGTTTCCATATAAT	AGGAGCAGTCTACAATCAAG
BY4743_10-23	BY4743	WT	a/α	2n	XII	852487	806628	SNP	1	G	T	2	G/T	54.1/45.9	100/85	185	G	54.0541	100	T	45.9459	85	TATTGAAATATTTGAAAAAT	CTTGTTTTTATGGGGACCAC	TATTGAAATATTTGAAAAAT	CTTGTTTTTATGGGGACCAC
BY4743_10-23	BY4743	WT	a/α	2n	XII	1008105	961177	SNP	1	T	C	2	C/T	51.6/48.4	111/104	215	C	51.6279	111	T	48.3721	104	GAAGATTGACCTCTTGATCT	CGTATGTATCCCAAACGATC	GAAGATTGACCTCTTGATCT	CGTATGTATCCCAAACGATC
BY4743_10-23	BY4743	WT	a/α	2n	XII	1038074	991150	SNP	1	G	T	1	T	98.8	166	168	T	98.8095	166				TATTCTAAAAGAGAAATGTG	TATGGCCAAATTGGAGAGAG	TATTCTAAAAGAGAAATGTG	TATGGCCAAATTGGAGAGAG
BY4743_10-23	BY4743	WT	a/α	2n	XIII	47679	45062	SNP	1	A	G	2	A/G	52.4/47.6	121/110	231	A	52.381	121	G	47.619	110	AGAATAACGAAAACTGCATC	ATACCTCATGAGCGTCCTGA	AGAATAACGAAAACTGCATC	ATACCTCATGAGCGTCCTGA
BY4743_10-23	BY4743	WT	a/α	2n	XIII	475468	461574	SNP	1	A	T	2	A/T	50.3/49.7	89/88	177	A	50.2825	89	T	49.7175	88	ATGCATGTTACTATATGTAT	TTTGTATACGCGATAATTTG	ATGCATGTTACTATATGTAT	TTTGTATACGCGATAATTTG
BY4743_10-23	BY4743	WT	a/α	2n	XIII	483578	469684	SNP	1	C	G	2	G/C	50.8/49.2	67/65	132	G	50.7576	67	C	49.2424	65	TCATTGTCTGTCAGTCGGCA	GGATGAAAGGTGACAAACGC	TCATTGTCTGTCAGTCGGCA	GGATGAAAGGTGACAAACGC
BY4743_10-23	BY4743	WT	a/α	2n	XIII	838011	824117	SNP	1	G	C	2	C/G	52.9/46.7	127/112	240	C	52.9167	127	G	46.6667	112	CGGGCGTTCGACTCGCCCCC	GGAGATATTTTTTTACTTTT	CGGGCGTTCGACTCGCCCCC	GGAGATATTTTTTTACTTTT
BY4743_10-23	BY4743	WT	a/α	2n	XIV	42234	37143	SNP	1	T	A	1	A	97.8	89	91	A	97.8022	89				GCCAGTTTCTATCATGTTCG	CCAAATGGAATGGTCTAGAG	GCCAGTTTCTATCATGTTCG	CCAAATGGAATGGTCTAGAG
BY4743_10-23	BY4743	WT	a/α	2n	XIV	300929	295599	SNP	1	T	A	2	T/A	51.6/48.4	16/15	31	T	51.6129	16	A	48.3871	15	AGCTACGAGAAACTGAAAAG	AAAAAAAAAAAAAAAAAATA	AGCTACGAGAAACTGAAAAG	AAAAAAAAAAAAAAAAAATA
BY4743_10-23	BY4743	WT	a/α	2n	XIV	413146	407813	SNP	1	G	T	1	T	100	82	82	T	100	82				AAGGGCTAAAGGACTTGATG	ATTTATGTGACGTTGTAGAA	AAGGGCTAAAGGACTTGATG	ATTTATGTGACGTTGTAGAA
BY4743_10-23	BY4743	WT	a/α	2n	XIV	560781	555449	SNP	1	G	T	1	T	98	99	101	T	98.0198	99				GAAGCCCGTTATTACGGTCT	TGATCCAGCAAATGTCAGAT	GAAGCCCGTTATTACGGTCT	GGATCCAGCAAATGTCAGAT
BY4743_10-23	BY4743	WT	a/α	2n	XIV	560782	555450	SNP	1	T	G	1	G	98	100	102	G	98.0392	100				AAGCCCGTTATTACGGTCTG	GATCCAGCAAATGTCAGATA	AAGCCCGTTATTACGGTCTT	GATCCAGCAAATGTCAGATA
BY4743_10-23	BY4743	WT	a/α	2n	XIV	782404	776714	SNP	1	G	A	1	A	100	55	55	A	100	55				AAATGTATATTAATATTATA	ACCTATTTGATCAATGACGG	AAATGTATATTAATATTATA	ACCTATTTGATCAATGACGG
BY4743_10-23	BY4743	WT	a/α	2n	XIV	783370	777537	SNP	1	G	A	1	A	88.5	23	26	A	88.4615	23				GGGTATATTGAAATAAGTGT	TATAAATTGAGTGGTTAGTA	GGGTATATTGAAATAAGTGT	TATAATTTGAGTGGTTAGTA
BY4743_10-23	BY4743	WT	a/α	2n	XIV	783376	777543	SNP	1	A	T	1	T	91.9	34	37	T	91.8919	34				ATTGAAATAAGTGTGTATAA	TTGAGTGGTTAGTATATGGT	ATTGAAATAAGTGTATATAA	TTGAGTGGTTAGTATATGGT
BY4743_10-23	BY4743	WT	a/α	2n	XIV	784017	778183	SNP	1	T	G	1	G	81.3	13	16	G	81.25	13				TTAGAATAGGGTTAGGGTAG	GTTAGGGTAGTGTTAGGGTA	TT-GAATAGGGTTAGGGTAG	GTTAGGGTAGTGTTAGGGTG
BY4743_10-23	BY4743	WT	a/α	2n	XIV	784037	778203	SNP	1	A	G	2	A/G	50.0/50.0	20/20	40	A	50	20	G	50	20	TGTTAGGGTAGTGTTAGGGT	GTGTGTGGGTGTGGTGTGTG	GGTTAGGGTAGTGTTAGGGT	GTGTGTGGGTGTGGTGTGTG
BY4743_10-23	BY4743	WT	a/α	2n	XVI	405240	394117	SNP	1	A	C	2	A/C	51.8/48.2	85/79	164	A	51.8293	85	C	48.1707	79	GATTATGTCTGTTGAAGATA	CTCAAGTATTCTAGGCTTAA	GATTATGTCTGTTGAAGATA	CTCAAGTATTCTAGGCTTAA
BY4743_10-23	BY4743	WT	a/α	2n	XVI	629462	615155	SNP	1	C	A	2	A/C	52.3/47.7	81/74	155	A	52.2581	81	C	47.7419	74	ACGTTCTTCTTCTATCTCTT	TCCTCAAAAACTGCGTTCAT	ACGTTCTTCTTCTATCTCTT	TCCTCAAAAACTGCGTTCAT
BY4743_10-23	BY4743	WT	a/α	2n	XVI	665109	650802	SNP	1	C	T	2	C/T	53.6/46.4	97/84	181	C	53.5912	97	T	46.4088	84	CCCGAGTTAACGTACATTGC	GTTGACAACAAGAGTGGAAC	CCCGAGTTAACGTACATTGC	GTTGACAACAAGAGTGGAAC
BY4743_10-23	BY4743	WT	a/α	2n	XVI	712252	697945	SNP	1	G	T	1	T	99.5	183	184	T	99.4565	183				CCACCCCCTCTAGCGTGGCC	TCCATCTTGGTTAATATAAT	CCACCCCCTCTAGCGTGGCC	TCCATCTTGGTTAATATAAT
BY4743_10-23	BY4743	WT	a/α	2n	XII	1065030	1018106	DIP	2	GT	--	1	--	46.6	125	268	--	46.6418	125				TAGGGTAGTGTTAGGGTTAG	GTGTGTGTGTGTGTGTGGGT	TAGGGTAGTGTTAGGGTTAG	GTGTGTGTGTGTGTGGGTGT
BY4743_10-24	BY4743	WT	a/α	2n	II	617514	614386	SNP	1	T	C	1	C	56.5	117	207	C	56.5217	117				TCTCTTGATCATCCTTAATT	TCAATTCAGTTTCAATCTCC	TCTCTTGATCATCCTTAATT	TCAATTCAGTTTCAATCTCC
BY4743_10-24	BY4743	WT	a/α	2n	II	633635	630507	SNP	1	A	G	2	G/A	54.5/45.5	102/85	187	G	54.5455	102	A	45.4545	85	TGCAATTATGTCTGTGCACC	CAAAAAGAAGCTAATGCCCA	TGCAATTATGTCTGTGCACC	CAAAAAGAAGCTAATGCCCA
BY4743_10-24	BY4743	WT	a/α	2n	III	315912	304990	SNP	1	T	C	2	T/C	52.0/48.0	91/84	175	T	52	91	C	48	84	AGTATACGGTGAAAAAGAGG	ATAACGTATGTATTAAGGGA	AGTATACGGTGAAAAAGAGG	ATAACGTATGTATTAAGGGA
BY4743_10-24	BY4743	WT	a/α	2n	IV	77111	74834	SNP	1	A	G	2	A/G	53.2/46.8	82/72	154	A	53.2468	82	G	46.7532	72	CAGCCGTCTCGTCTTTCATG	TAAAGTGAAATAGAGCAGCG	CAGCCGTCTCGTCTTTCATG	TAAAGTGAAATAGAGCAGCG
BY4743_10-24	BY4743	WT	a/α	2n	IV	602726	593633	SNP	1	T	C	2	C/T	52.7/47.3	69/62	131	C	52.6718	69	T	47.3282	62	ATAAACATGTCTGAAGATTC	AGTAATGAAATTGCTCGAAT	ATAAACATGTCTGAAGATTC	AGTAATGAAATTGCTCGAAT
BY4743_10-24	BY4743	WT	a/α	2n	IV	682731	670039	SNP	1	A	G	2	G/A	54.3/45.7	76/64	140	G	54.2857	76	A	45.7143	64	ACTGATTCGCTGATTAAGCA	AATCGATTACAATACCGGGG	ACTGATTCGCTGATTAAGCA	AATCGATTACAATACCGGGG
BY4743_10-24	BY4743	WT	a/α	2n	IV	765644	752954	SNP	1	G	A	2	A/G	50.4/49.6	66/65	131	A	50.3817	66	G	49.6183	65	AGAGCTGAGTTTCCCATGCT	TCGGTTGGTATAATTTAAGG	AGAGCTGAGTTTCCCATGCT	TCGGTTGGTATAATTTAAGG
BY4743_10-24	BY4743	WT	a/α	2n	IV	1088784	1071403	SNP	1	C	A	2	C/A	54.0/46.0	87/74	161	C	54.0373	87	A	45.9627	74	TTAAAGATGCTAAAAAGCAA	GTAAATTGGAAAGAAGAAAA	TTAAAGATGCTAAAAAGCAA	GTAAATTGGAAAGAAGAAAA
BY4743_10-24	BY4743	WT	a/α	2n	IV	1138980	1116820	SNP	1	G	A	2	A/G	51.2/48.8	88/84	172	A	51.1628	88	G	48.8372	84	TTGAACATTGTGTAGCTTCC	ACTACAAGGATGTAGAAAGG	TTGAACATTGTGTAGCTTCC	ACTACAAGGATGTAGAAAGG
BY4743_10-24	BY4743	WT	a/α	2n	IV	1141071	1118911	SNP	1	A	G	2	G/A	50.6/49.4	84/82	166	G	50.6024	84	A	49.3976	82	GTTACTGTGATAAACTATTG	AATTATTTATAGTATATTTT	GTTACTGTGATAAACTATTG	AATTATTTATAGTATATTTT
BY4743_10-24	BY4743	WT	a/α	2n	IV	1478533	1452431	SNP	1	G	C	2	G/C	50.3/49.7	100/99	199	G	50.2513	100	C	49.7487	99	AATAGATATTTTAGCATTCA	AAAGTTTCAATTTCCAAGAC	AATAGATATTTTAGCATTCA	AAAGTTTCAATTTCCAAGAC
BY4743_10-24	BY4743	WT	a/α	2n	V	227860	226765	SNP	1	G	T	2	T/G	51.6/48.4	96/90	186	T	51.6129	96	G	48.3871	90	ACTGTAGTAGTGATCGTATC	TCGAAGCTATCACCTAGATT	ACTGTAGTAGTGATCGTATC	TCGAAGCTATCACCTAGATT
BY4743_10-24	BY4743	WT	a/α	2n	VI	37427	37160	SNP	1	G	C	2	C/G	54.7/45.3	88/73	161	C	54.6584	88	G	45.3416	73	GTGGTCAACGCATCGTTGAT	ATTATTGGGAATCTTTAGCT	GTGGTCAACGCATCGTTGAT	ATTATTGGGAATCTTTAGCT
BY4743_10-24	BY4743	WT	a/α	2n	VI	85747	85480	SNP	1	T	A	2	T/A	54.3/45.7	119/100	219	T	54.3379	119	A	45.6621	100	TTTGAAGACCTGGGCACTGT	AGAATACTATCAACAGCTGT	TTTGAAGACCTGGGCACTGT	AGAATACTATCAACAGCTGT
BY4743_10-24	BY4743	WT	a/α	2n	VII	361069	361074	SNP	1	G	T	2	G/T	52.0/48.0	78/72	150	G	52	78	T	48	72	CTTTTTCCAACATTCTGTCT	CCTCGTCTAATACTAAGTAA	CTTTTTCCAACATTCTGTCT	CCTCGTCTAATACTAAGTAA
BY4743_10-24	BY4743	WT	a/α	2n	VII	525885	525892	SNP	1	G	A	2	G/A	54.0/46.0	87/74	161	G	54.0373	87	A	45.9627	74	TTCCACTGGCCTCATGCTGA	TATCCATCTTACCAATACCC	TTCCACTGGCCTCATGCTGA	TATCCATCTTACCAATACCC
BY4743_10-24	BY4743	WT	a/α	2n	VII	639673	631431	SNP	1	G	A	2	G/A	55.0/45.0	22/18	40	G	55	22	A	45	18	AATTGAGAAAAAACAAAAAA	AAAAAAAAAAAAAAAAAAAA	AATTGAGAAAAAACAAAAAA	AAAAAAAAAAAAAAAAAAAA
BY4743_10-24	BY4743	WT	a/α	2n	VIII	23573	23577	SNP	1	G	C	2	C/G	50.3/49.7	100/99	199	C	50.2513	100	G	49.7487	99	GCCTAAGTATAAAATTCTAC	TATGTATATATTTACATGCA	GCCTAAGTATAAAATTCTAC	TATGTATATATTTACATGCA
BY4743_10-24	BY4743	WT	a/α	2n	X	349268	335882	SNP	1	G	A	2	G/A	54.5/45.5	108/90	198	G	54.5455	108	A	45.4545	90	GCTATCCTGCCAAGAAGGCC	GATAGAGAGATTGAAAAAGA	GCTATCCTGCCAAGAAGGCC	GATAGAGAGATTGAAAAAGA
BY4743_10-24	BY4743	WT	a/α	2n	X	487198	468681	SNP	1	A	C	2	A/C	53.3/46.7	104/91	195	A	53.3333	104	C	46.6667	91	AATATGTTCATAAAGTTCCC	TCATCTACAAAGATATCACC	AATATGTTCATAAAGTTCCC	TCATCTACAAAGATATCACC
BY4743_10-24	BY4743	WT	a/α	2n	X	633368	614851	SNP	1	G	A	2	G/A	50.8/49.2	93/90	183	G	50.8197	93	A	49.1803	90	ATTTGAATATTTCTGATAGG	TAAAATCACTTTTTAGGGTT	ATTTGAATATTTCTGATAGG	TAAAATCACTTTTTAGGGTT
BY4743_10-24	BY4743	WT	a/α	2n	X	704175	685659	SNP	1	G	A	2	G/A	54.3/45.7	100/84	184	G	54.3478	100	A	45.6522	84	TCGCCAAGTGTGTCTCTTTC	TGTAGCGACGCACGTCAGAC	TCGCCAAGTGTGTCTCTTTC	TGTAGCGACGCACGTCAGAC
BY4743_10-24	BY4743	WT	a/α	2n	XI	332774	332778	SNP	1	G	T	2	G/T	51.2/48.8	88/84	172	G	51.1628	88	T	48.8372	84	TCTCAACATCTCCAGTCTTT	TAACGATATCCAAATCATGT	TCTCAACATCTCCAGTCTTT	TAACGATATCCAAATCATGT
BY4743_10-24	BY4743	WT	a/α	2n	XII	614840	570909	SNP	1	A	G	1	G	98.6	146	148	G	98.6486	146				AACATATAATAGTATACCCA	GAATGCAAATCTAATTGATG	AACATATAATAGTATACCCA	GAATGCAAATCTAATTGATG
BY4743_10-24	BY4743	WT	a/α	2n	XIII	634105	619421	SNP	1	A	G	1	G	66.2	104	157	G	66.242	104				TCAATTCGGCTGGTCTGCTA	CATGGAAAGAATCATGAAGG	TCAATTCGGCTGGTCTGCTA	CATGGAAAGAATCATGAAGG
BY4743_10-24	BY4743	WT	a/α	2n	XIV	85578	80432	SNP	1	C	A	2	C/A	54.0/46.0	107/91	198	C	54.0404	107	A	45.9596	91	TTCTGCGTCAATGGTAAATA	AAAACTGTCTTTTTTGCCCG	TTCTGCGTCAATGGTAAATA	AAAACTGTCTTTTTTGCCCG
BY4743_10-24	BY4743	WT	a/α	2n	XIV	178905	173290	SNP	1	A	T	2	A/T	50.0/50.0	85/85	170	A	50	85	T	50	85	GTACGTATAGTGGTACTGAT	TAGACACCATCAAAATTAGA	GTACGTATAGTGGTACTGAT	TAGACACCATCAAAATTAGA
BY4743_10-24	BY4743	WT	a/α	2n	XIV	186527	180912	SNP	1	G	A	2	A/G	52.3/47.7	81/74	155	A	52.2581	81	G	47.7419	74	TGGATGTTGCGGCACCAGAA	CGGAAATAGTAGTGGCCGCC	TGGATGTTGCGGCACCAGAA	CGGAAATAGTAGTGGCCGCC
BY4743_10-24	BY4743	WT	a/α	2n	XIV	478890	473273	SNP	1	C	A	2	C/A	53.3/46.7	96/84	180	C	53.3333	96	A	46.6667	84	TCCAACTTCTCGATCTCTTC	TCCAATTGGTGGTTCTTCAC	TCCAACTTCTCGATCTCTTC	TCCAATTGGTGGTTCTTCAC
BY4743_10-24	BY4743	WT	a/α	2n	XIV	784054	778002	SNP	1	T	G	2	G/T	51.3/48.7	182/173	355	G	51.2676	182	T	48.7324	173	GGTAGTGTGTGGGTGTGGTG	TGTGTGGGTGTGTGGGTGTG	GGTAGTGTGTGGGTGTGGTG	GTGTGGGTGTGTGGGTGTGG
BY4743_10-24	BY4743	WT	a/α	2n	XV	50730	50730	SNP	1	A	G	2	G/A	51.7/48.3	90/84	174	G	51.7241	90	A	48.2759	84	AACTTGTAGAACTTTTTGAT	CAACTGGATGGCTTTCAAAT	AACTTGTAGAACTTTTTGAT	CAACTGGATGGCTTTCAAAT
BY4743_10-24	BY4743	WT	a/α	2n	XV	148867	145688	SNP	1	T	A	2	T/A	50.2/49.8	110/109	219	T	50.2283	110	A	49.7717	109	AAGTTGAGTTTAATGAGGAA	TAGGAAAGATAAGAAGTAAA	AAGTTGAGTTTAATGAGGAA	TAGGAAAGATAAGAAGTAAA
BY4743_10-24	BY4743	WT	a/α	2n	XV	702428	696232	SNP	1	A	G	2	G/A	51.6/48.4	95/89	184	G	51.6304	95	A	48.3696	89	AATTACCTCATTTGCAGATC	ATTTCAAAGGCTTCGGTTCG	AATTACCTCATTTGCAGATC	ATTTCAAAGGCTTCGGTTCG
BY4743_10-24	BY4743	WT	a/α	2n	XV	812819	805581	SNP	1	G	C	2	C/G	52.8/47.2	75/67	142	C	52.8169	75	G	47.1831	67	TACGTTGAATTTCACGGTCT	CTGAAGTACCTTCACTGAAT	TACGTTGAATTTCACGGTCT	CTGAAGTACCTTCACTGAAT
BY4743_10-24	BY4743	WT	a/α	2n	XVI	9518	2831	SNP	1	C	A	2	C/A	52.4/47.6	87/79	166	C	52.4096	87	A	47.5904	79	TTTATTTAGTCATAAAAAAA	AAAAAAAAAAAAAAAAAAAA	TTTATTTAGTCATAAAAAAA	AAAAAAAAAAAAAAAAAAAA
BY4743_10-24	BY4743	WT	a/α	2n	XVI	136825	125202	SNP	1	G	T	2	G/T	50.2/49.8	104/103	207	G	50.2415	104	T	49.7585	103	GTATGTCCGAATTTTATGAT	ATGATGATGATAACGACAGT	GTATGTCCGAATTTTATGAT	ATGATGATGATAACGACAGT
BY4743_10-24	BY4743	WT	a/α	2n	XVI	436000	424368	SNP	1	C	T	2	T/C	51.7/48.3	78/73	151	T	51.6556	78	C	48.3444	73	TTAAGGCAATAGAATAATAA	ACTTATCCACGCAACAGTAA	TTAAGGCAATAGAATAATAA	ACTTATCCACGCAACAGTAA
BY4743_10-24	BY4743	WT	a/α	2n	XVI	474985	460227	SNP	1	T	A	1	A	60.6	83	137	A	60.5839	83				CAAAACTCTCTAAAACGAAA	CAAAAATATTCGTAACACAT	CAAAACTCTCTAAAACGAAA	CAAAAATATTCGTAACACAT
BY4743_10-24	BY4743	WT	a/α	2n	Mito	75724	75724	SNP	1	G	C	1	C	96.3	552	573	C	96.3351	552				TAATTATAAATTACCATATC	GTATAAATAGTGATATTCAA	TAATTATAAATTACCATATC	TATAAATAGTGATATTCAAC
BY4743_10-24	BY4743	WT	a/α	2n	Mito	61034	61037	DIP	1	A	-	1	-	85.1	412	484	-	85.124	412				AAAATAAAATGAAAAATATT	AAAAAAATCAAGTAATAAAT	AAAATAAAATGAAAAATATT	AAAAAAATCAAGTAATAAAT
BY4743_10-3	BY4743	WT	a/α	2n	I	16700	16700	SNP	1	C	G	2	C/G	51.9/48.1	69/64	133	C	51.8797	69	G	48.1203	64	TGATACTTTAGCCCTTAGTA	CTGACGGTGCCTAAAATGAG	TGATACTTTAGCCCTTAGTA	CTGACGGTGCCTAAAATGAG
BY4743_10-3	BY4743	WT	a/α	2n	I	29978	29852	SNP	1	T	G	2	T/G	50.4/49.6	67/66	133	T	50.3759	67	G	49.6241	66	TTACGTCAATCTCTGGTCAA	CCATGTCCAAAAAAATTTCT	TTACGTCAATCTCTGGTCAA	CCATGTCCAAAAAAATTTCT
BY4743_10-3	BY4743	WT	a/α	2n	I	39690	39564	SNP	1	T	C	2	C/T	51.4/48.6	73/69	142	C	51.4085	73	T	48.5915	69	ATAATATCAGATATGCAAAG	AAAAGCGGTCGAGGAACAAA	ATAATATCAGATATGCAAAG	AAAAGCGGTCGAGGAACAAA
BY4743_10-3	BY4743	WT	a/α	2n	II	226101	224136	SNP	1	T	A	2	A/T	50.0/47.7	22/21	44	A	50	22	T	47.7273	21	GGAATACGAGAGATAAGCAA	TAATATGGCACAAAAGCAAA	GGAATACGAGAGATAAGCAA	TAATATGGCACAAAAGCAAA
BY4743_10-3	BY4743	WT	a/α	2n	II	688369	685203	SNP	1	T	C	2	T/C	51.4/48.6	71/67	138	T	51.4493	71	C	48.5507	67	TGATGGCATCTCAGCGTCTG	CTTGTTTTTGGCTATGATTT	TGATGGCATCTCAGCGTCTG	CTTGTTTTTGGCTATGATTT
BY4743_10-3	BY4743	WT	a/α	2n	III	13987	13609	SNP	1	T	C	2	T/C	53.8/46.2	63/54	117	T	53.8462	63	C	46.1538	54	CTATGTATTTGTATAAAATA	GATATTACTCAGACTCAAGC	CTATGTATTTGTATAAAATA	GATATTACTCAGACTCAAGC
BY4743_10-3	BY4743	WT	a/α	2n	III	58788	58410	SNP	1	A	T	2	A/T	53.2/46.8	66/58	124	A	53.2258	66	T	46.7742	58	TCTTCATAAAACCGAAAAAG	TGTTAAGAAATGTTTACACT	TCTTCATAAAACCGAAAAAG	TGTTAAGAAATGTTTACACT
BY4743_10-3	BY4743	WT	a/α	2n	III	82475	82097	SNP	1	A	T	2	A/T	51.8/48.2	57/53	110	A	51.8182	57	T	48.1818	53	AAAAAAACTCCGATACGGGG	GTCGAACCCCGGTCTCCACG	AAAAAAACTCCGATACGGGG	GTCGAACCCCGGTCTCCACG
BY4743_10-3	BY4743	WT	a/α	2n	IV	64044	61823	SNP	1	T	C	2	T/C	53.5/46.5	68/59	127	T	53.5433	68	C	46.4567	59	AGCTTTCTCTTCCTCTTGCT	CCGGAATCATCATCGTGCCA	AGCTTTCTCTTCCTCTTGCT	CCGGAATCATCATCGTGCCA
BY4743_10-3	BY4743	WT	a/α	2n	IV	246332	244111	SNP	1	C	T	2	C/T	52.0/48.0	64/59	123	C	52.0325	64	T	47.9675	59	TTGGTTGGCATCACCATTGT	CGGGCCTAACAGATTTGACC	TTGGTTGGCATCACCATTGT	CGGGCCTAACAGATTTGACC
BY4743_10-3	BY4743	WT	a/α	2n	IV	488820	486602	SNP	1	G	A	2	A/G	51.0/49.0	50/48	98	A	51.0204	50	G	48.9796	48	TCCAACCGAGGTTCGAACTC	GGATCTTCGCCGTGTAAAGG	TCCAACCGAGGTTCGAACTC	GGATCTTCGCCGTGTAAAGG
BY4743_10-3	BY4743	WT	a/α	2n	IV	606086	596718	SNP	1	C	T	2	T/C	50.5/49.5	55/54	109	T	50.4587	55	C	49.5413	54	TATACCAAGGCTATACCGCA	CTTTTGAAAGCTAAGGACTT	TATACCAAGGCTATACCGCA	CTTTTGAAAGCTAAGGACTT
BY4743_10-3	BY4743	WT	a/α	2n	IV	1095614	1077142	SNP	1	T	C	2	C/T	52.8/47.2	56/50	106	C	52.8302	56	T	47.1698	50	CGGATTTAAATTAAACTTTT	CTTCTATTTCAATGCATTTA	CGGATTTAAATTAAACTTTT	CTTCTATTTCAATGCATTTA
BY4743_10-3	BY4743	WT	a/α	2n	IV	1130722	1107554	SNP	1	A	T	2	T/A	52.3/47.7	45/41	86	T	52.3256	45	A	47.6744	41	AATGTTTCTTCACCTCCTTC	AACAATCAGCTACCATAATA	AATGTTTCTTCACCTCCTTC	AACAATCAGCTACCATAATA
BY4743_10-3	BY4743	WT	a/α	2n	V	401230	400132	SNP	1	C	A	2	C/A	54.9/45.1	67/55	122	C	54.918	67	A	45.082	55	AGTATTTCCAACAATTCAGA	CAAACCATTGCATTTAAGGT	AGTATTTCCAACAATTCAGA	CAAACCATTGCATTTAAGGT
BY4743_10-3	BY4743	WT	a/α	2n	V	442189	441091	SNP	1	T	C	2	T/C	53.8/45.5	78/66	145	T	53.7931	78	C	45.5172	66	TCTGCCCGGAGGCGGGAGAG	CCGTTCTGAAGTGTCCCGGC	TCTGCCCGGAGGCGGGAGAG	CCGTTCTGAAGTGTCCCGGC
BY4743_10-3	BY4743	WT	a/α	2n	VII	29544	29549	SNP	1	C	A	2	A/C	51.2/48.8	63/60	123	A	51.2195	63	C	48.7805	60	GTGGCCAGTAAATTTAGTAT	CCTTGTAATGATAGAAATTT	GTGGCCAGTAAATTTAGTAT	CCTTGTAATGATAGAAATTT
BY4743_10-3	BY4743	WT	a/α	2n	VII	360555	360560	SNP	1	A	T	2	A/T	54.4/45.6	68/57	125	A	54.4	68	T	45.6	57	TCCTCCACAGTCAATGGGAA	GTTAAATTAATAACTGTCTT	TCCTCCACAGTCAATGGGAA	GTTAAATTAATAACTGTCTT
BY4743_10-3	BY4743	WT	a/α	2n	VII	531594	531601	SNP	1	G	A	2	A/G	55.0/45.0	44/36	80	A	55	44	G	45	36	TATATTGCTAGTTGAAAATC	AACACTCGAGTTACTTCCGT	TATATTGCTAGTTGAAAATC	AACACTCGAGTTACTTCCGT
BY4743_10-3	BY4743	WT	a/α	2n	VII	553941	551860	SNP	1	C	A	2	C/A	53.9/46.1	55/47	102	C	53.9216	55	A	46.0784	47	ATCCTTAAAGACCTGGTCTA	GATCAAATGATTTTTTTAGT	ATCCTTAAAGACCTGGTCTA	GATCAAATGATTTTTTTAGT
BY4743_10-3	BY4743	WT	a/α	2n	VII	739949	732898	SNP	1	T	A	2	A/T	50.4/49.6	57/56	113	A	50.4425	57	T	49.5575	56	TCACTACAATACAATATGTG	GGTATCTTTGCAGCCTTCAA	TCACTACAATACAATATGTG	GGTATCTTTGCAGCCTTCAA
BY4743_10-3	BY4743	WT	a/α	2n	VII	759856	752805	SNP	1	G	A	2	A/G	52.3/47.7	56/51	107	A	52.3364	56	G	47.6636	51	ACTTTCCGTTAGATCAAGAA	TACTTTTGAATTTGACTATA	ACTTTCCGTTAGATCAAGAA	TACTTTTGAATTTGACTATA
BY4743_10-3	BY4743	WT	a/α	2n	VII	838511	825244	SNP	1	G	A	1	A	60.4	119	197	A	60.4061	119				TCAATCAAAAGAATACATTG	GAGTCGGCTTTTACACCTGC	TCAATCAAAAGAATACATTG	GAGTCGGCTTTTACACCTGC
BY4743_10-3	BY4743	WT	a/α	2n	VII	843295	830028	SNP	1	A	T	1	T	62.7	121	193	T	62.6943	121				AGAATTTCTTGTGGCACACC	CTACCAAAACGTATTGGTAT	AGAATTTCTTGTGGCACACC	CTACCAAAACGTATTGGTAT
BY4743_10-3	BY4743	WT	a/α	2n	VII	855708	842441	SNP	1	G	C	1	C	56.4	97	172	C	56.3953	97				ATCTTTTTGTCAGTCAACCA	AACATAGAAGCATAGTTACC	ATCTTTTTGTCAGTCAACCA	AACATAGAAGCATAGTTACC
BY4743_10-3	BY4743	WT	a/α	2n	VII	865769	852502	SNP	1	G	A	1	A	69.5	137	197	A	69.5431	137				GACATATTGGAATGTTCTAT	TAATTTGTGTGACCTGTAAA	GACATATTGGAATGTTCTAT	TAATTTGTGTGACCTGTAAA
BY4743_10-3	BY4743	WT	a/α	2n	VII	876020	862753	SNP	1	G	T	1	T	59.8	101	169	T	59.7633	101				CTAATATATTATCATATACG	TGTTAGATGATGGCATAAGT	CTAATATATTATCATATACG	TGTTAGATGATGGCATAAGT
BY4743_10-3	BY4743	WT	a/α	2n	VII	880677	867410	SNP	1	G	A	1	A	64.4	112	174	A	64.3678	112				GACATCAACAACACCAACCT	AGTAAAGATCTATCCGTGAG	GACATCAACAACACCAACCT	AGTAAAGATCTATCCGTGAG
BY4743_10-3	BY4743	WT	a/α	2n	VII	1080768	1067501	SNP	1	A	C	1	C	98.7	152	154	C	98.7013	152				ATAAATAGTTCATTATATGT	AGTGTATATTAATATTGTTA	ATAAATAGTTCATTATATGT	AGTGTATATTAATATTGTTA
BY4743_10-3	BY4743	WT	a/α	2n	VIII	129922	128031	SNP	1	C	T	2	C/T	53.2/46.8	59/52	111	C	53.1532	59	T	46.8468	52	CGGCTGTTGTAGCGGTTATA	CGTTGTGCCAAAGAACGACC	CGGCTGTTGTAGCGGTTATA	CGTTGTGCCAAAGAACGACC
BY4743_10-3	BY4743	WT	a/α	2n	VIII	171316	169425	SNP	1	A	T	2	A/T	50.4/49.6	59/58	117	A	50.4274	59	T	49.5726	58	TGACAACTTCGTCATCCACA	TCTTGTAAATTTCCTTCATT	TGACAACTTCGTCATCCACA	TCTTGTAAATTTCCTTCATT
BY4743_10-3	BY4743	WT	a/α	2n	VIII	180926	179035	SNP	1	A	T	2	T/A	52.3/47.7	57/52	109	T	52.2936	57	A	47.7064	52	GAAGACATAATCAGAAATGA	GAAGTCGAAGATGAGATCAA	GAAGACATAATCAGAAATGA	GAAGTCGAAGATGAGATCAA
BY4743_10-3	BY4743	WT	a/α	2n	X	53067	39347	SNP	1	C	T	2	C/T	54.7/45.3	75/62	137	C	54.7445	75	T	45.2555	62	TGCATAAACCCGTTTATTCA	TTGTTGAAAACTCAGATAAT	TGCATAAACCCGTTTATTCA	TTGTTGAAAACTCAGATAAT
BY4743_10-3	BY4743	WT	a/α	2n	X	201267	187547	SNP	1	A	G	2	A/G	52.9/47.1	54/48	102	A	52.9412	54	G	47.0588	48	GGCGATACGAGTTTACCAAT	AAAACTTTAGAAAGCATTAA	GGCGATACGAGTTTACCAAT	AAAACTTTAGAAAGCATTAA
BY4743_10-3	BY4743	WT	a/α	2n	X	349397	335677	SNP	1	G	A	2	G/A	53.0/47.0	61/54	115	G	53.0435	61	A	46.9565	54	TCGTTTGCAGTGTAACTGTT	TATTGAACGTGGACAAGGAC	TCGTTTGCAGTGTAACTGTT	TATTGAACGTGGACAAGGAC
BY4743_10-3	BY4743	WT	a/α	2n	X	494875	476069	SNP	1	G	A	2	G/A	53.1/46.9	69/61	130	G	53.0769	69	A	46.9231	61	TTACTTCAAAAATACCACGT	TTAAAGAGACTTCAAAAGCT	TTACTTCAAAAATACCACGT	TTAAAGAGACTTCAAAAGCT
BY4743_10-3	BY4743	WT	a/α	2n	X	511107	492301	SNP	1	C	A	2	A/C	50.9/49.1	55/53	108	A	50.9259	55	C	49.0741	53	GTTTAAGACTTTCTTCCAAG	AGAACCCCAAGGCAGAATCG	GTTTAAGACTTTCTTCCAAG	AGAACCCCAAGGCAGAATCG
BY4743_10-3	BY4743	WT	a/α	2n	X	521002	502196	SNP	1	T	C	2	T/C	51.6/48.4	63/59	122	T	51.6393	63	C	48.3607	59	GTAAGCTAAGGCAGCGGCGG	TGGTTCATTGACGACACGTA	GTAAGCTAAGGCAGCGGCGG	TGGTTCATTGACGACACGTA
BY4743_10-3	BY4743	WT	a/α	2n	XI	86351	86355	SNP	1	C	G	2	C/G	50.7/49.3	70/68	138	C	50.7246	70	G	49.2754	68	GGTAATCTCTTACTAGTCTC	TGCCCTGTAGGTGATGTGAT	GGTAATCTCTTACTAGTCTC	TGCCCTGTAGGTGATGTGAT
BY4743_10-3	BY4743	WT	a/α	2n	XI	195554	195558	SNP	1	T	A	1	A	55.8	63	113	A	55.7522	63				GCCTATACGCAAAGACTCAA	CATCCATTGAGAAAATTTCA	GCCTATACGCAAAGACTCAA	CATCCATTGAGAAAATTTCA
BY4743_10-3	BY4743	WT	a/α	2n	XII	26779	20548	SNP	1	A	G	2	A/G	50.5/49.5	53/52	105	A	50.4762	53	G	49.5238	52	GTAGGATCCCATGTAGGCAA	TAATCTGGATACTTCGATTT	GTAGGATCCCATGTAGGCAA	TAATCTGGATACTTCGATTT
BY4743_10-3	BY4743	WT	a/α	2n	XII	980763	934179	SNP	1	A	G	1	G	96.9	62	64	G	96.875	62				ATGCTTGGAAGGTATTGTAT	TATACGCATGTTCTTCATAA	ATGCTTGGAAGGTATTGTAT	TATACGCATGTTCTTCATAA
BY4743_10-3	BY4743	WT	a/α	2n	XII	981894	935310	SNP	1	C	T	1	T	99.2	118	119	T	99.1597	118				GTACTTCAAGCCTGATCCTG	TTTTTCTTCTGATTTGATCT	GTACTTCAAGCCTGATCCTG	TTTTTCTTCTGATTTGATCT
BY4743_10-3	BY4743	WT	a/α	2n	XII	1015846	969266	SNP	1	T	A	1	A	96.8	122	126	A	96.8254	122				CTTCCCCATTTGATAAAATG	TAACCAATGCTCATCGCCCA	CTTCCCCATTTGATAAAATG	TAACCAATGCTCATCGCCCA
BY4743_10-3	BY4743	WT	a/α	2n	XIII	262077	250653	SNP	1	C	A	2	A/C	50.8/49.2	66/64	130	A	50.7692	66	C	49.2308	64	CTTAATAATTTCATGCCCAA	ACATTCTGGTAGAATTCTAA	CTTAATAATTTCATGCCCAA	ACATTCTGGTAGAATTCTAA
BY4743_10-3	BY4743	WT	a/α	2n	XIII	323928	312504	SNP	1	A	T	2	A/T	51.5/48.5	51/48	99	A	51.5152	51	T	48.4848	48	TAAAGAAATCAATATTCAAA	ATATAATAATAATACCATAA	TAAAGAAATCAATATTCAAA	ATATAATAATAATACCATAA
BY4743_10-3	BY4743	WT	a/α	2n	XIII	639824	624743	SNP	1	T	G	2	G/T	50.0/50.0	64/64	128	G	50	64	T	50	64	TTGAATTTACATAAGACATT	TCCATTCCTCATGGTGGTGG	TTGAATTTACATAAGACATT	TCCATTCCTCATGGTGGTGG
BY4743_10-3	BY4743	WT	a/α	2n	XIV	26297	20818	SNP	1	T	A	2	A/T	50.8/49.2	66/64	130	A	50.7692	66	T	49.2308	64	ACCCTGAAGCCTACAGTCGT	ACAGGTACAAGTAGAAACAG	ACCCTGAAGCCTACAGTCGT	ACAGGTACAAGTAGAAACAG
BY4743_10-3	BY4743	WT	a/α	2n	XIV	233242	227467	SNP	1	T	C	2	C/T	51.3/48.7	59/56	115	C	51.3043	59	T	48.6957	56	TCGTAGCAGCTTTATGGACA	TCTAGCTTTATAAAGTTGCT	TCGTAGCAGCTTTATGGACA	TCTAGCTTTATAAAGTTGCT
BY4743_10-3	BY4743	WT	a/α	2n	XIV	705702	699441	SNP	1	A	T	2	A/T	52.3/47.7	78/71	149	A	52.349	78	T	47.651	71	TCATCTGCTCCCTCTTCTCT	CAAACATCTGTTACCACTAC	TCATCTGCTCCCTCTTCTCT	CAAACATCTGTTACCACTAC
BY4743_10-3	BY4743	WT	a/α	2n	XV	28583	28583	SNP	1	A	G	2	G/A	51.1/48.9	71/68	139	G	51.0791	71	A	48.9209	68	AAAAGAATAAAAAAAATAAA	AAAATCCAAATATTAAGCTA	AAAAGAATAAAAAAAATAAA	AAAATCCAAATATTAAGCTA
BY4743_10-3	BY4743	WT	a/α	2n	XV	89811	89811	SNP	1	C	G	2	C/G	52.7/47.3	79/71	150	C	52.6667	79	G	47.3333	71	CCAATTGTTTGCCATATAAA	GATTTTGACATCTTTTCCAT	CCAATTGTTTGCCATATAAA	GATTTTGACATCTTTTCCAT
BY4743_10-3	BY4743	WT	a/α	2n	XV	97536	97536	SNP	1	T	A	2	A/T	50.0/50.0	66/66	132	A	50	66	T	50	66	CGCGGTAAAAGGCAAAAAGG	TCACTATACACAAAATGTCT	CGCGGTAAAAGGCAAAAAGG	TCACTATACACAAAATGTCT
BY4743_10-3	BY4743	WT	a/α	2n	XV	594396	591274	SNP	1	C	A	2	A/C	53.5/46.5	61/53	114	A	53.5088	61	C	46.4912	53	CGGGCCTCATGCTTGGGAAG	ATAAATTCTAACCACTGAAC	CGGGCCTCATGCTTGGGAAG	ATAAATTCTAACCACTGAAC
BY4743_10-3	BY4743	WT	a/α	2n	XV	750002	742543	SNP	1	T	C	2	T/C	52.8/47.2	67/60	127	T	52.7559	67	C	47.2441	60	CAATTAATTGCTGGGATGCC	GCTGAAGGTGGTGACGGGGA	CAATTAATTGCTGGGATGCC	GCTGAAGGTGGTGACGGGGA
BY4743_10-3	BY4743	WT	a/α	2n	XVI	161057	149075	SNP	1	A	G	2	G/A	53.9/46.1	62/53	115	G	53.913	62	A	46.087	53	GCAGACTCTGAGGAAGATGA	GAAGAAGGTAATGGTAGTGA	GCAGACTCTGAGGAAGATGA	GAAGAAGGTAATGGTAGTGA
BY4743_10-3	BY4743	WT	a/α	2n	XVI	176518	164536	SNP	1	A	T	2	A/T	54.4/45.6	68/57	125	A	54.4	68	T	45.6	57	AGAGGTTATGAGCAGTAATA	ACTTCAACAAAAACGTGTGG	AGAGGTTATGAGCAGTAATA	ACTTCAACAAAAACGTGTGG
BY4743_10-3	BY4743	WT	a/α	2n	XVI	232707	220725	SNP	1	T	A	2	T/A	50.4/49.6	60/59	119	T	50.4202	60	A	49.5798	59	GGACAGTCATATGAATTGCA	TTACTAGCTATATGGTCATT	GGACAGTCATATGAATTGCA	TTACTAGCTATATGGTCATT
BY4743_10-3	BY4743	WT	a/α	2n	XVI	317813	305831	SNP	1	T	C	2	C/T	50.9/49.1	57/55	112	C	50.8929	57	T	49.1071	55	TCGTTGGATCAAAATCGAAT	GACCTGCATCCTTAATGTTC	TCGTTGGATCAAAATCGAAT	GACCTGCATCCTTAATGTTC
BY4743_10-3	BY4743	WT	a/α	2n	III	7266	7266	DIP	1	A	-	1	-	55.8	67	120	-	55.8333	67				TGAAAAAGGTGAAAAAATTG	AAAAAGTAACACCAAGGGGT	TGAAAAAGGTGAAAAAATTG	AAAAAGTAACACCAAGGGGT
BY4743_10-4	BY4743	WT	a/α	2n	II	392949	389942	SNP	1	C	A	1	A	99.6	252	253	A	99.6047	252				TCTTCTTTTTAGAACATCAT	TTTGAGTACTTCGGCCACTT	TCTTCTTTTTAGAACATCAT	TTTGAGTACTTCGGCCACTT
BY4743_10-4	BY4743	WT	a/α	2n	III	282743	272258	SNP	1	A	G	2	G/A	50.7/49.3	71/69	140	G	50.7143	71	A	49.2857	69	AAAAGACGAGCAAGCCATCG	TAAAAAGCACCTAAAGAATT	AAAAGACGAGCAAGCCATCG	TAAAAAGCACCTAAAGAATT
BY4743_10-4	BY4743	WT	a/α	2n	III	301413	290928	SNP	1	T	A	2	A/T	51.8/48.2	87/81	168	A	51.7857	87	T	48.2143	81	CTGATCCATCTGGCGTTGTA	TAATCAACTCTAATGGATGG	CTGATCCATCTGGCGTTGTA	TAATCAACTCTAATGGATGG
BY4743_10-4	BY4743	WT	a/α	2n	IV	178641	176800	SNP	1	A	G	2	G/A	54.3/45.7	69/58	127	G	54.3307	69	A	45.6693	58	TTCGTCTCATGATCTTATCG	TGATGCAGATATGTCTTCAA	TTCGTCTCATGATCTTATCG	TGATGCAGATATGTCTTCAA
BY4743_10-4	BY4743	WT	a/α	2n	IV	193078	191237	SNP	1	T	C	2	T/C	52.8/47.2	86/77	163	T	52.7607	86	C	47.2393	77	GAAGTTCATTATTGTTTACA	TCTTCTCTGTGAGGCGAAAA	GAAGTTCATTATTGTTTACA	TCTTCTCTGTGAGGCGAAAA
BY4743_10-4	BY4743	WT	a/α	2n	IV	721588	709802	SNP	1	G	A	1	A	56	56	100	A	56	56				GAGTCTAGCAGAGAGAAGTC	ATGAAGAACAACCACGATCC	GAGTCTAGCAGAGAGAAGTC	ATGAAGAACAACCACGATCC
BY4743_10-4	BY4743	WT	a/α	2n	IV	804173	792387	SNP	1	G	A	1	A	97.5	119	122	A	97.541	119				AATACAAATTTTTACGCTAC	CACGTCATCGATATATACAT	AATACAAATTTTTACGCTAC	CACGTCATCGACATCTAAAT
BY4743_10-4	BY4743	WT	a/α	2n	IV	804185	792399	SNP	1	T	C	1	C	97.5	118	121	C	97.5207	118				TACGCTACGCACGTCATCGA	ATATACATATGACAGTTGCT	TACGCTACACACGTCATCGA	ATCTAAATATGACAGTTGCT
BY4743_10-4	BY4743	WT	a/α	2n	IV	804188	792402	SNP	1	A	C	1	C	97.4	112	115	C	97.3913	112				GCTACGCACGTCATCGATAT	TACATATGACAGTTGCTGAT	GCTACACACGTCATCGACAT	TAAATATGACAGTTGCTGAT
BY4743_10-4	BY4743	WT	a/α	2n	IV	804191	792405	SNP	1	C	A	1	A	97.3	110	113	A	97.3451	110				ACGCACGTCATCGATATATA	ATATGACAGTTGCTGATCTG	ACACACGTCATCGACATCTA	ATATGACAGTTGCTGATCTG
BY4743_10-4	BY4743	WT	a/α	2n	IV	886622	873985	SNP	1	T	C	1	C	98.1	101	103	C	98.0583	101				GCCTTTGATGAAGAAGAGTA	ATTGATTTGATGAACATCAT	GCCTTTGATGAAGAAGAGTA	ATTGATTTGATGAACATCAT
BY4743_10-4	BY4743	WT	a/α	2n	IV	981039	968402	SNP	1	C	A	1	A	100	111	111	A	100	111				TTCTAATCTTTCGCCTTAAC	ACTCGGCCAAGTTGCCTCAA	TTCTAATCTTTCGCCTTAAC	ACTCGGCCAAGTTGCCTCAA
BY4743_10-4	BY4743	WT	a/α	2n	IV	1330301	1304159	SNP	1	T	C	2	T/C	52.7/46.4	58/51	110	T	52.7273	58	C	46.3636	51	CCCGACTTCACTCCAGTAGA	AGAATAATCCCATGATAACA	CCCGACTTCACTCCAGTAGA	AGAATAATCCCATGATAACA
BY4743_10-4	BY4743	WT	a/α	2n	IV	1426663	1400521	SNP	1	T	A	1	A	98.3	118	120	A	98.3333	118				TTAATAGTAACGTCTCTGCG	TTAATTGTTCATGGGTATGG	TTAATAGTAACGTCTCTGCG	TTAATTGTTCATGGGTATGG
BY4743_10-4	BY4743	WT	a/α	2n	V	236672	235576	SNP	1	G	A	1	A	55.2	96	174	A	55.1724	96				AAGACCAAAGCAGTCTTCCA	CATTTCAGGGTGCTTTTCAT	AAGACCAAAGCAGTCTTCCA	CATTTCAGGGTGCTTTTCAT
BY4743_10-4	BY4743	WT	a/α	2n	V	256152	255056	SNP	1	C	T	2	C/T	51.4/48.6	71/67	138	C	51.4493	71	T	48.5507	67	TAAAATTTCTTCTTGTCCGC	ACGTTCTTGTATCTTTTATT	TAAAATTTCTTCTTGTCCGC	ACGTTCTTGTATCTTTTATT
BY4743_10-4	BY4743	WT	a/α	2n	V	260430	259334	SNP	1	C	T	2	T/C	51.2/48.8	84/80	164	T	51.2195	84	C	48.7805	80	AACAAAGTTTTAGTCTTATT	GGATGTTTCCCTTCTTATTT	AACAAAGTTTTAGTCTTATT	GGATGTTTCCCTTCTTATTT
BY4743_10-4	BY4743	WT	a/α	2n	V	267312	266216	SNP	1	G	T	2	G/T	52.5/47.5	93/84	177	G	52.5424	93	T	47.4576	84	AATAGATGAACCAAAAGAAA	AACACTACCTGCAGTAGTTG	AATAGATGAACCAAAAGAAA	AACACTACCTGCAGTAGTTG
BY4743_10-4	BY4743	WT	a/α	2n	V	396868	395771	SNP	1	A	T	2	T/A	52.6/47.4	101/91	192	T	52.6042	101	A	47.3958	91	AATCACACAAGATGTCGTCA	TCAACAAATAAAAAAGTATA	AATCACACAAGATGTCGTCA	TCAACAAATAAAAAAGTATA
BY4743_10-4	BY4743	WT	a/α	2n	VI	27033	26747	SNP	1	A	G	2	A/G	50.7/49.3	75/73	148	A	50.6757	75	G	49.3243	73	AATGGATACATGCCAGAGAA	TGTCTGTGAAATTGAACAAT	AATGGATACATGCCAGAGAA	TGTCTGTGAAATTGAACAAT
BY4743_10-4	BY4743	WT	a/α	2n	VII	160	163	SNP	1	T	C	1	C	97.2	138	142	C	97.1831	138				ACAACTCCAACCACCATCCA	CTCTCTACTTACTACTACCA	ACAACTCCAACCACCATCCA	CTCTCTACTTACTACTACCA
BY4743_10-4	BY4743	WT	a/α	2n	VII	101210	101215	SNP	1	A	T	1	T	98.1	210	214	T	98.1308	210				ATATTCATTTGAAGAATCCA	TTTTAATGGGTAAAAAGAAA	ATATTCATTTGAAGAATCCA	TTTTAATGGGTAAAAAGAAA
BY4743_10-4	BY4743	WT	a/α	2n	VII	655260	648001	SNP	1	T	C	1	C	72.3	133	184	C	72.2826	133				AGTATGAACGCGTACTCTGG	CATTCCTTCATCATGGTCAA	AGTATGAACGCGTACTCTGG	CATTCCTTCATCATGGTCAA
BY4743_10-4	BY4743	WT	a/α	2n	VII	874781	861402	SNP	1	A	T	1	T	95.5	190	199	T	95.4774	190				AATTTATATACCAAATCCAA	TTTTTAAAAATCTGGGATCG	AATTTATATACCAAATCCAA	TTTTTAAAAATCTGGGATCG
BY4743_10-4	BY4743	WT	a/α	2n	VII	1066838	1053459	SNP	1	T	C	1	C	100	188	188	C	100	188				CGGTTTGCGTTCCTCTCTCG	TCTGCTTGACAAAAGAAAGA	CGGTTTGCGTTCCTCTCTCG	TCTGCTTGACAAAAGAAAGA
BY4743_10-4	BY4743	WT	a/α	2n	VIII	395239	391567	SNP	1	T	A	1	A	99.3	142	143	A	99.3007	142				AAATTGAGGAAGCAATTCTA	TGGAAGGCGCTGCTTCCGTA	AAATTGAGGAAGCAATTCTA	TGGAAGGCGCTGCTTCCGTA
BY4743_10-4	BY4743	WT	a/α	2n	VIII	526390	522716	SNP	1	C	A	2	C/A	54.4/45.6	148/124	272	C	54.4118	148	A	45.5882	124	CCATGGACCGGTACTTTCAC	TCTACATCCACTGAGATGAC	CCATGGACCGGTACTTTCAC	TCTACATCCACTGAGATGAC
BY4743_10-4	BY4743	WT	a/α	2n	VIII	526402	522728	SNP	1	T	A	2	T/A	54.2/45.8	147/124	271	T	54.2435	147	A	45.7565	124	ACTTTCACCTCTACATCCAC	GAGATGACTACTGTCACCGG	ACTTTCACCTCTACATCCAC	GAGATGACTACTGTCACCGG
BY4743_10-4	BY4743	WT	a/α	2n	IX	365165	349864	SNP	1	A	C	1	C	97.4	151	155	C	97.4194	151				TTCTAGCAGTCGATAATTTA	ATGGATTTAAAATTGGCGGT	TTCTAGCAGTCGATAATTTA	ATGGATTTAAAATTGGCGGT
BY4743_10-4	BY4743	WT	a/α	2n	X	90160	76997	SNP	1	G	C	1	C	97.8	136	139	C	97.8417	136				ATCTCAGATATAAATCTACA	CAGACTAATATGCCACTAAC	ATCTCAGATATAAATCTACA	CAGACTAATATGCCACTAAC
BY4743_10-4	BY4743	WT	a/α	2n	X	402300	389137	SNP	1	A	C	1	C	98.5	131	133	C	98.4962	131				AAGTACCATTCGGCGTCTTC	ACAGACGTAACAATAATCTC	AAGTACCATTCGGCGTCTTC	ACAGACGTAACAATAATCTC
BY4743_10-4	BY4743	WT	a/α	2n	X	639220	620909	SNP	1	G	T	2	G/T	54.2/45.8	26/22	48	G	54.1667	26	T	45.8333	22	TTTTTTTTTTTTTTTTTTTT	CTTTTCATTTTGGCTCTGCT	TTTTTTTTTTTTTTTTTTTT	CTTTTCATTTTGGCTCTGCT
BY4743_10-4	BY4743	WT	a/α	2n	X	712830	694520	SNP	1	A	G	1	G	98.1	53	54	G	98.1481	53				GGTCGAGCAAACACCACCAG	GCATGTTGTTATAGTTGTTT	GGTCGAGCAAACACCACCAG	GCATGTTGTTATAGTTGTTT
BY4743_10-4	BY4743	WT	a/α	2n	X	713038	694728	SNP	1	G	T	1	T	95.7	22	23	T	95.6522	22				CTAATGGTAGCGGTGGTAGT	GCTTCGCTGGTGATTGTAGT	CTAATGGTAGCGGTGGTAGT	GCTTCGCTGGTGATTGTAGT
BY4743_10-4	BY4743	WT	a/α	2n	XI	118966	118970	SNP	1	A	T	1	T	60.1	119	198	T	60.101	119				GGATCTATGATCACTACTTC	CTATACATGCTATTGCCTCG	GGATCTATGATCACTACTTC	CTATACATGCTATTGCCTCG
BY4743_10-4	BY4743	WT	a/α	2n	XI	129738	129742	SNP	1	A	G	1	G	66	126	191	G	65.9686	126				AGAACTTCTAAGATACTCAG	TGCAAGACGTTCAAAATCAG	AGAACTTCTAAGATACTCAG	TGCAAGACGTTCAAAATCAG
BY4743_10-4	BY4743	WT	a/α	2n	XI	343433	343437	SNP	1	C	A	1	A	70	126	180	A	70	126				AACAACATCTTTTGGAGATG	ACTCTTCCCTATAGGAGTCA	AACAACATCTTTTGGAGATG	ACTCTTCCCTATAGGAGTCA
BY4743_10-4	BY4743	WT	a/α	2n	XI	377591	377595	SNP	1	A	G	1	G	70.4	138	196	G	70.4082	138				ATTGAAACGATATTTAAACT	CTGGATTATTATCATGGATA	ATTGAAACGATATTTAAACT	CTGGATTATTATCATGGATA
BY4743_10-4	BY4743	WT	a/α	2n	XII	109716	103584	SNP	1	C	A	1	A	70.8	143	202	A	70.7921	143				CGGACTGCTCATAGCCCTTG	TTTCGGAATATTAGAAGTGG	CGGACTGCTCATAGCCCTTG	TTTCGGAATATTAGAAGTGG
BY4743_10-4	BY4743	WT	a/α	2n	XII	502814	461255	SNP	1	G	A	1	A	100	109	109	A	100	109				TACACTCTCAAATTTGGTTC	ATTATGACAAATGGCCAGGA	TACACTCTCAAATTTGGTTC	ATTATGACAAATGGCCAGGA
BY4743_10-4	BY4743	WT	a/α	2n	XIII	280743	269448	SNP	1	A	G	1	G	61.2	123	201	G	61.194	123				GCGGAAGCAGAGGCAGAGGC	GAGGCAGAGGCAGCAGCGGC	GCGGAAGCAGAGGCAGAGGC	GAGGCAGAGGCAGCAGCGGC
BY4743_10-4	BY4743	WT	a/α	2n	XIII	554018	539512	SNP	1	T	A	2	T/A	53.9/46.1	110/94	204	T	53.9216	110	A	46.0784	94	CTTAATCAACATGCAATATC	GATACCTCTCAAATAGATAG	CTTAATCAACATGCAATATC	GATACCTCTCAAATAGATAG
BY4743_10-4	BY4743	WT	a/α	2n	XIII	765987	751481	SNP	1	T	C	1	C	69.5	132	190	C	69.4737	132				ATCGGTATTCAGCAATAACG	TGAAAAAAAAGTTTCATCTA	ATCGGTATTCAGCAATAACG	TGAAAAAAAAGTTTCATCTA
BY4743_10-4	BY4743	WT	a/α	2n	XIII	924425	909918	SNP	1	T	G	2	T/G	53.6/46.4	15/13	28	T	53.5714	15	G	46.4286	13	TGGTGTGGGTGTGGTGTGTG	GTGGGG	TGGTGTGGGTGTGGTGTGTG	GTGGGG
BY4743_10-4	BY4743	WT	a/α	2n	XIV	196451	191135	SNP	1	T	C	2	T/C	52.8/47.2	67/60	127	T	52.7559	67	C	47.2441	60	TATCCTTCGTATCTTCTGGC	TAGTCACGGGCCAAGCGTAA	TATCCTTCGTATCTTCTGGC	TAGTCACGGGCCAAGCGTAA
BY4743_10-4	BY4743	WT	a/α	2n	XIV	428990	423671	SNP	1	C	A	2	C/A	54.6/45.4	65/54	119	C	54.6218	65	A	45.3782	54	CACCAATGACAGTCAAGAGG	ACCCATTCTAAAAAACATCA	CACCAATGACAGTCAAGAGG	ACCCATTCTAAAAAACATCA
BY4743_10-4	BY4743	WT	a/α	2n	XIV	538578	533260	SNP	1	G	A	1	A	65.3	98	150	A	65.3333	98				TGAAAGCGAAGTTCGATTAC	ACTTGGATTCGGATAGAATA	TGAAAGCGAAGTTCGATTAC	ACTTGGATTCGGATAGAATA
BY4743_10-4	BY4743	WT	a/α	2n	XV	415654	412567	SNP	1	T	A	2	A/T	52.8/47.2	66/59	125	A	52.8	66	T	47.2	59	TAGCACTGTACAATGGAGAA	TTGGGTCAGCCTGGATATCA	TAGCACTGTACAATGGAGAA	TTGGGTCAGCCTGGATATCA
BY4743_10-4	BY4743	WT	a/α	2n	XV	474382	471295	SNP	1	A	T	2	A/T	50.7/49.3	70/68	138	A	50.7246	70	T	49.2754	68	GGAAGGTAGCAATCAAAAGA	AACTTGCTAGCAGTATTACA	GGAAGGTAGCAATCAAAAGA	AACTTGCTAGCAGTATTACA
BY4743_10-4	BY4743	WT	a/α	2n	XV	772283	765026	SNP	1	A	G	2	A/G	50.4/49.6	57/56	113	A	50.4425	57	G	49.5575	56	ATTATTCAATATTTAATTAA	CAATACTTACTACTGATGAA	ATTATTCAATATTTAATTAA	CAATACTTACTACTGATGAA
BY4743_10-4	BY4743	WT	a/α	2n	XV	775628	768371	SNP	1	C	G	2	G/C	51.6/48.4	66/62	128	G	51.5625	66	C	48.4375	62	CAATCGCATCGGTGGGAGAG	ATAAACTTCTACTGAAGATA	CAATCGCATCGGTGGGAGAG	ATAAACTTCTACTGAAGATA
BY4743_10-4	BY4743	WT	a/α	2n	XV	816551	809294	SNP	1	T	A	2	T/A	52.8/47.2	65/58	123	T	52.8455	65	A	47.1545	58	GTTGGTAAACCAACACCTTG	TGTTTGACATCAACAATTAA	GTTGGTAAACCAACACCTTG	TGTTTGACATCAACAATTAA
BY4743_10-4	BY4743	WT	a/α	2n	XVI	170146	158396	SNP	1	C	G	1	G	97.9	143	146	G	97.9452	143				TTGTTGGAATGGACAGATAT	TCATGTTGGTTTCGAGTAAA	TTGTTGGAATGGACAGATAT	TCATGTTGGTTTCGAGTAAA
BY4743_10-4	BY4743	WT	a/α	2n	XVI	597040	581814	SNP	1	T	A	2	A/T	54.0/46.0	67/57	124	A	54.0323	67	T	45.9677	57	CAGGGCAGAATTCGTTCTTC	GCGAGCGCTTCTGGAAGGTC	CAGGGCAGAATTCGTTCTTC	GCGAGCGCTTCTGGAAGGTC
BY4743_10-4	BY4743	WT	a/α	2n	Mito	46308	46312	SNP	1	A	T	2	T/A	52.7/47.3	39/35	74	T	52.7027	39	A	47.2973	35	ATAAAAAAGGTAATAAATAA	AATTTATAGTTCCGGGGCCC	ATAAAAAAGGTAATAAATAA	TATTAATAGTTCCGGGGCCC
BY4743_10-4	BY4743	WT	a/α	2n	Mito	46312	46317	SNP	1	T	A	1	A	97.6	498	510	A	97.6471	498				AAAAGGTAATAAATAAAATT	TATAGTTCCGGGGCCCGGCC	AAAGGTAATAAATAAATATT	ATAGTTCCGGGGCCCGGCCA
BY4743_10-4	BY4743	WT	a/α	2n	Mito	55465	55470	SNP	1	C	G	1	G	56.3	18	32	G	56.25	18				GGGCGGACCCCGAAGGAGTC	GAACCCCTTTTTTATTTAAT	GGGCGGACCCCGAAGGAGTC	GGACCCC-TTTTTATTTAAT
BY4743_10-4	BY4743	WT	a/α	2n	Mito	55467	55472	SNP	1	A	G	1	G	81.8	18	22	G	81.8182	18				GCGGACCCCGAAGGAGTCCG	ACCCCTTTTTTATTTAATTT	GCGGACCCCGAAGGAGTCGG	ACCCC-TTTTTATTTAATAT
BY4743_10-4	BY4743	WT	a/α	2n	XV	4	4	DIP	1	-	C	2	C/-	53.8/46.2	14/12	26	C	53.8462	14	-	46.1538	12	ACA	CCACACCCACACCACACCCA	ACA	CCACACCCACACCACACCCA
BY4743_10-4	BY4743	WT	a/α	2n	Mito	46309	46313	DIP	1	-	T	1	T	87.3	399	457	T	87.3085	399				TAAAAAAGGTAATAAATAAA	ATTTATAGTTCCGGGGCCCG	TAAAAAAGGTAATAAATAAA	ATTAATAGTTCCGGGGCCCG
BY4743_10-5	BY4743	WT	a/α	2n	I	5199	5199	SNP	1	T	C	2	T/C	53.8/46.2	77/66	143	T	53.8462	77	C	46.1538	66	GTTGGTCTAGAGGTAGCTTG	TGTGGTCACTAATGAGAACT	GTTGGTCTAGAGGTAGCTTG	TGTGGTCACTAATGAGAACT
BY4743_10-5	BY4743	WT	a/α	2n	I	6521	6521	SNP	1	A	G	2	G/A	51.6/48.4	80/75	155	G	51.6129	80	A	48.3871	75	TAATAAGCTTAGTAAATCCT	AAGATAACAACTAAAATTAT	TAATAAGCTTAGTAAATCCT	AAGATAACAACTAAAATTAT
BY4743_10-5	BY4743	WT	a/α	2n	I	161658	161478	SNP	1	A	G	2	G/A	51.7/48.3	15/14	29	G	51.7241	15	A	48.2759	14	ACGAACTTCTTCCATACCAC	CTGTTTTATCAGGTATGATT	ACGAACTTCTTCCATACCAC	CTGTTTTATCAGGTATGATT
BY4743_10-5	BY4743	WT	a/α	2n	II	649658	646399	SNP	1	A	G	2	A/G	52.6/47.4	70/63	133	A	52.6316	70	G	47.3684	63	CCCAATGGCAACAGCAATAA	ACGGCCTCAAGCATGAACAC	CCCAATGGCAACAGCAATAA	ACGGCCTCAAGCATGAACAC
BY4743_10-5	BY4743	WT	a/α	2n	II	798981	795716	SNP	1	A	G	2	A/G	50.0/50.0	75/75	150	A	50	75	G	50	75	ACTAACAAATTAATGGCACA	CGTGGGGATGACGAAAAAGC	ACTAACAAATTAATGGCACA	CGTGGGGATGACGAAAAAGC
BY4743_10-5	BY4743	WT	a/α	2n	III	49424	48845	SNP	1	G	C	1	C	96.3	77	80	C	96.25	77				TATTCTTCCAATTCTTCCTC	TCATTGTAGAATAAGTAACC	TATTCTTCCAATTCTTCCTC	TCATTGTAGAATAAGTAACC
BY4743_10-5	BY4743	WT	a/α	2n	III	116761	109320	SNP	1	C	A	1	A	98.7	75	76	A	98.6842	75				CGAGGATGAAAGTGTGCGGC	AGAAAAATCTTTTCTTTTTA	CGAGGATGAAAGTGTGCGGC	AGAAAAATCTTTTCTTTTTA
BY4743_10-5	BY4743	WT	a/α	2n	III	276187	264891	SNP	1	A	G	1	G	100	53	53	G	100	53				TTCCAAATCAGGAGCTGCAG	CATAAAGAGACATCCCTTCT	TTCCAAATCAGGAGCTGCAG	CATAAAGAGACATCCCTTCT
BY4743_10-5	BY4743	WT	a/α	2n	IV	52981	50964	SNP	1	C	G	2	G/C	52.7/47.3	77/69	146	G	52.7397	77	C	47.2603	69	AATCCGAGGTTTGAGGACAC	AGGGTTCACGTAGCATTATA	AATCCGAGGTTTGAGGACAC	AGGGTTCACGTAGCATTATA
BY4743_10-5	BY4743	WT	a/α	2n	IV	66062	64045	SNP	1	G	T	2	G/T	51.1/48.9	69/66	135	G	51.1111	69	T	48.8889	66	GAAAATGAAAAAAAAAAAAT	TAAAAGTGAAAAAAGGGACG	GAAAATGAAAAAAAAAAAAT	TAAAAGTGAAAAAAGGGACG
BY4743_10-5	BY4743	WT	a/α	2n	IV	83387	81370	SNP	1	T	C	2	C/T	53.3/46.7	81/71	152	C	53.2895	81	T	46.7105	71	TAACGTCTGGGCTTCCATGC	TCTACCATTTAGAATGATGT	TAACGTCTGGGCTTCCATGC	TCTACCATTTAGAATGATGT
BY4743_10-5	BY4743	WT	a/α	2n	IV	206486	204469	SNP	1	T	A	2	T/A	51.2/48.8	84/80	164	T	51.2195	84	A	48.7805	80	GGTAGTTAACATACGAACCA	CAGAAGCAATAACATTGTAA	GGTAGTTAACATACGAACCA	CAGAAGCAATAACATTGTAA
BY4743_10-5	BY4743	WT	a/α	2n	IV	700531	688483	SNP	1	G	A	1	A	57	73	128	A	57.0312	73				AAAGAATAACTGTTTATGAA	AAAATATCCAACCAGCGATC	AAAGAATAACTGTTTATGAA	AAAATATCCAACCAGCGATC
BY4743_10-5	BY4743	WT	a/α	2n	IV	744061	732013	SNP	1	T	A	2	A/T	51.1/48.9	67/64	131	A	51.145	67	T	48.855	64	CATTATTGATTTGGTGATAC	AATGCAATGTAGTTATATGT	CATTATTGATTTGGTGATAC	AATGCAATGTAGTTATATGT
BY4743_10-5	BY4743	WT	a/α	2n	IV	761010	748962	SNP	1	A	G	2	A/G	51.9/48.1	70/65	135	A	51.8519	70	G	48.1481	65	AATGCAATCATCCCACTCGG	TGGAGCTAGAGGAATCCTGT	AATGCAATCATCCCACTCGG	TGGAGCTAGAGGAATCCTGT
BY4743_10-5	BY4743	WT	a/α	2n	IV	899602	884483	SNP	1	G	A	1	A	99.4	157	158	A	99.3671	157				TCATTGTCCGTAATATCATC	TGAAAACCAGTGTCCTCGTT	TCATTGTCCGTAATATCATC	TGAAAACCAGTGTCCTCGTT
BY4743_10-5	BY4743	WT	a/α	2n	IV	1085882	1066946	SNP	1	A	T	1	T	98.4	122	124	T	98.3871	122				AAAGAAAGCTTACACTGATA	TGTGCCCAAAAATTTCAAAG	AAAGAAAGCTTACACTGATA	TGTGCCCAAAAATTTCAAAG
BY4743_10-5	BY4743	WT	a/α	2n	IV	1164373	1139659	SNP	1	G	A	1	A	99	95	96	A	98.9583	95				CCATCTTTATGCTTCATACC	AATCTTCTCAAGAAATCAGT	CCATCTTTATGCTTCATACC	AATCTTCTGATGAAATCGGT
BY4743_10-5	BY4743	WT	a/α	2n	IV	1164382	1139668	SNP	1	C	G	1	G	98	97	99	G	97.9798	97				TGCTTCATACCGAATCTTCT	AAGAAATCAGTTTGGGCGAC	TGCTTCATACCAAATCTTCT	ATGAAATCGGTTTGATTGAT
BY4743_10-5	BY4743	WT	a/α	2n	IV	1164384	1139670	SNP	1	A	T	1	T	98	98	100	T	98	98				CTTCATACCGAATCTTCTCA	GAAATCAGTTTGGGCGACGA	CTTCATACCAAATCTTCTGA	GAAATCGGTTTGATTGATGA
BY4743_10-5	BY4743	WT	a/α	2n	IV	1164391	1139677	SNP	1	A	G	1	G	100	96	96	G	100	96				CCGAATCTTCTCAAGAAATC	GTTTGGGCGACGAAACCAGA	CCAAATCTTCTGATGAAATC	GTTTGATTGATGAAACCAGA
BY4743_10-5	BY4743	WT	a/α	2n	IV	1386469	1358961	SNP	1	A	G	1	G	99.2	131	132	G	99.2424	131				CGATGGAAATGAAGGTGCCC	CTGACTTCCCCCCAAATACG	CGATGGAAATGAAGGTGCCC	CTGACTTCCCCCCAAATACG
BY4743_10-5	BY4743	WT	a/α	2n	V	27791	27787	SNP	1	T	A	2	T/A	53.7/46.3	80/69	149	T	53.6913	80	A	46.3087	69	ACATCTTCTCCAGCACCTTC	TACATTGAATTGATAGATCC	ACATCTTCTCCAGCACCTTC	TACATTGAATTGATAGATCC
BY4743_10-5	BY4743	WT	a/α	2n	V	237468	236368	SNP	1	A	G	2	A/G	50.3/49.7	81/80	161	A	50.3106	81	G	49.6894	80	TGATAAACAATTGCTGTTAA	TAATGTACGGAAGGTTTGGA	TGATAAACAATTGCTGTTAA	TAATGTACGGAAGGTTTGGA
BY4743_10-5	BY4743	WT	a/α	2n	VI	18286	18126	SNP	1	G	A	2	G/A	54.0/46.0	74/63	137	G	54.0146	74	A	45.9854	63	AATAAGTTATACGCACCTGA	AATAAGGAAGGCGTGGGTTG	AATAAGTTATACGCACCTGA	AATAAGGAAGGCGTGGGTTG
BY4743_10-5	BY4743	WT	a/α	2n	VI	30780	30620	SNP	1	T	C	2	C/T	51.7/48.3	76/71	147	C	51.7007	76	T	48.2993	71	CCCATGTAGGTACGCTCTTT	CACCAGGTCTTAATAATTTG	CCCATGTAGGTACGCTCTTT	CACCAGGTCTTAATAATTTG
BY4743_10-5	BY4743	WT	a/α	2n	VII	183881	183886	SNP	1	G	A	2	A/G	50.0/50.0	69/69	138	A	50	69	G	50	69	TGAAACAAAGTGGTTGTGAA	TATCTGAGTGGATGGATAAA	TGAAACAAAGTGGTTGTGAA	TATCTGAGTGGATGGATAAA
BY4743_10-5	BY4743	WT	a/α	2n	VII	217264	217269	SNP	1	G	T	2	T/G	53.6/46.4	81/70	151	T	53.6424	81	G	46.3576	70	TGAGATCAGTGTCCCTGACT	GCAAAATGGACAGGTCGAAG	TGAGATCAGTGTCCCTGACT	GCAAAATGGACAGGTCGAAG
BY4743_10-5	BY4743	WT	a/α	2n	VII	351667	351672	SNP	1	A	T	2	T/A	50.3/49.7	72/71	143	T	50.3497	72	A	49.6503	71	AGACATCCCATCTTGGAATG	TACCTCTATACCAATGGTCC	AGACATCCCATCTTGGAATG	TACCTCTATACCAATGGTCC
BY4743_10-5	BY4743	WT	a/α	2n	VII	1036300	1021646	SNP	1	A	T	2	T/A	50.4/49.6	71/70	141	T	50.3546	71	A	49.6454	70	ATATCTTGCAAATGATGGGG	GAGCTGGTAGACCGGCTTAT	ATATCTTGCAAATGATGGGG	GAGCTGGTAGACCGGCTTAT
BY4743_10-5	BY4743	WT	a/α	2n	VIII	352617	348748	SNP	1	G	A	2	A/G	54.7/45.3	75/62	137	A	54.7445	75	G	45.2555	62	TTGTCGCGCGAATGATATTA	CGGAAACAAAACGATCAAAC	TTGTCGCGCGAATGATATTA	CGGAAACAAAACGATCAAAC
BY4743_10-5	BY4743	WT	a/α	2n	VIII	555601	546641	SNP	1	T	C	1	C	55.1	81	147	C	55.102	81				GGTACTACCGAATCACCAGG	GAATATTTCTATCAAGATGG	GGTACTACCGAATCACCAGG	GAATATTTCTATCAAGATGG
BY4743_10-5	BY4743	WT	a/α	2n	IX	60189	44517	SNP	1	T	A	2	T/A	53.4/46.6	79/69	148	T	53.3784	79	A	46.6216	69	CTTGGCTTTGGGGTTGCGAA	TGCTATAAATACCATTTGAA	CTTGGCTTTGGGGTTGCGAA	TGCTATAAATACCATTTGAA
BY4743_10-5	BY4743	WT	a/α	2n	IX	188194	172525	SNP	1	G	A	2	G/A	50.9/49.1	83/80	163	G	50.9202	83	A	49.0798	80	GAAACTCCAAAGAGGGATCC	AACATCTCCGCTTCTTCCAA	GAAACTCCAAAGAGGGATCC	AACATCTCCGCTTCTTCCAA
BY4743_10-5	BY4743	WT	a/α	2n	X	202547	189110	SNP	1	C	A	1	A	55.2	58	105	A	55.2381	58				GATTAGAAAAAGTTCAATTC	GCATATGTCAACTTATAAAA	GATTAGAAAAAGTTCAATTC	GCATATGTCAACTTATAAAA
BY4743_10-5	BY4743	WT	a/α	2n	X	466243	452806	SNP	1	C	A	2	C/A	52.9/47.1	73/65	138	C	52.8986	73	A	47.1014	65	TGGCTGTTTACAAAAAAATA	AAGAATCCGTTACTAAAGAT	TGGCTGTTTACAAAAAAATA	AAGAATCCGTTACTAAAGAT
BY4743_10-5	BY4743	WT	a/α	2n	X	667130	648791	SNP	1	G	A	1	A	55.4	77	139	A	55.3957	77				TAGATTCACCAATGGTTCTA	ATATCATTTTTTCTTCTGTT	TAGATTCACCAATGGTTCTA	ATATCATTTTTTCTTCTGTT
BY4743_10-5	BY4743	WT	a/α	2n	X	702686	684347	SNP	1	G	T	2	G/T	52.1/47.9	75/69	144	G	52.0833	75	T	47.9167	69	TCTTAGAAAGACAATCAATG	CAAGGATTCACGCAATTTGT	TCTTAGAAAGACAATCAATG	CAAGGATTCACGCAATTTGT
BY4743_10-5	BY4743	WT	a/α	2n	XI	8661	8662	SNP	1	T	C	2	T/C	52.3/47.7	80/73	153	T	52.2876	80	C	47.7124	73	TATAAAGCTTGTGGTAAATT	TCCAGGACGGAAGTTAGCTT	TATAAAGCTTGTGGTAAATT	TCCAGGACGGAAGTTAGCTT
BY4743_10-5	BY4743	WT	a/α	2n	XI	26790	26791	SNP	1	G	A	2	G/A	53.5/46.5	69/60	129	G	53.4884	69	A	46.5116	60	CGGTATACCAATGGTTCCGT	TAATTCGATATTGACTAAGA	CGGTATACCAATGGTTCCGT	TAATTCGATATTGACTAAGA
BY4743_10-5	BY4743	WT	a/α	2n	XI	143811	143815	SNP	1	T	A	2	A/T	50.7/49.3	77/75	152	A	50.6579	77	T	49.3421	75	CAACGGGATGATAGGCGCAT	CGGACTTTCATTGATGCAAA	CAACGGGATGATAGGCGCAT	CGGACTTTCATTGATGCAAA
BY4743_10-5	BY4743	WT	a/α	2n	XI	574989	574991	SNP	1	G	T	2	T/G	54.4/45.6	92/77	169	T	54.4379	92	G	45.5621	77	GTTGACCAGGCTTGAAAGCA	GAAGACCCAAGTAGGGACAA	GTTGACCAGGCTTGAAAGCA	GAAGACCCAAGTAGGGACAA
BY4743_10-5	BY4743	WT	a/α	2n	XII	179346	173333	SNP	1	G	A	2	G/A	54.0/46.0	81/69	150	G	54	81	A	46	69	AACTGTCTCCCAACATGAGT	TTGTTCCAAAAGAACTTGAT	AACTGTCTCCCAACATGAGT	TTGTTCCAAAAGAACTTGAT
BY4743_10-5	BY4743	WT	a/α	2n	XII	329830	320847	SNP	1	T	C	2	T/C	52.8/47.2	67/60	127	T	52.7559	67	C	47.2441	60	GGTACAGTTTTGCTGCCAGT	TGCTGCGAGTATGTAATTAT	GGTACAGTTTTGCTGCCAGT	TGCTGCGAGTATGTAATTAT
BY4743_10-5	BY4743	WT	a/α	2n	XII	733564	689346	SNP	1	C	T	1	T	100	139	139	T	100	139				AAGTATCTATCTAACGGTTT	GGTGGTGTCTTATCTTTCGG	AAGTATCTATCTAACGGTTT	GGTGGTGTCTTATCTTTCGG
BY4743_10-5	BY4743	WT	a/α	2n	XII	913882	869667	SNP	1	G	A	1	A	97.9	142	145	A	97.931	142				ATGAAAATAATGGAAGGCTG	TACTTCCTTGCTTCATTAAA	ATGAAAATAATGGAAGGCTG	TACTTCCTTGCTTCATTAAA
BY4743_10-5	BY4743	WT	a/α	2n	XIII	294850	283135	SNP	1	T	G	1	G	56.6	77	136	G	56.6176	77				CGTCAAAAGAAGGATGACGT	AAACCTGAATTGGCTAACAA	CGTCAAAAGAAGGATGACGT	AAACCTGAATTGGCTAACAA
BY4743_10-5	BY4743	WT	a/α	2n	XIII	924421	909255	SNP	1	T	G	2	G/T	50.0/50.0	2017-10-10	20	G	50	10	T	50	10	GGTGTGGTGTGGGTGTGGTG	GTGTGTGGGG	GGTGTGGTGTGGGTGTGGTG	GTGTGTGGGG
BY4743_10-5	BY4743	WT	a/α	2n	XIV	555368	549797	SNP	1	A	T	2	A/T	52.8/47.2	57/51	108	A	52.7778	57	T	47.2222	51	AACCCCAAAGCAGACGTTAT	GAAGATAATGTGACTCTAAA	AACCCCAAAGCAGACGTTAT	GAAGATAATGTGACTCTAAA
BY4743_10-5	BY4743	WT	a/α	2n	XIV	561887	556316	SNP	1	G	A	2	A/G	54.5/45.5	91/76	167	A	54.491	91	G	45.509	76	ATGATTAATATGACCAATCG	CGTGTGTTTTATATACCTCT	ATGATTAATATGACCAATCG	CGTGTGTTTTATATACCTCT
BY4743_10-5	BY4743	WT	a/α	2n	XIV	749240	743390	SNP	1	C	A	1	A	55.2	91	165	A	55.1515	91				AACAACCTTTAAATTATCAA	GTCTTTCCGATAAGCTTCAG	AACAACCTTTAAATTATCAA	GTCTTTCCGATAAGCTTCAG
BY4743_10-5	BY4743	WT	a/α	2n	XIV	753675	747825	SNP	1	T	C	2	T/C	52.9/47.1	91/81	172	T	52.907	91	C	47.093	81	CCCAATCGAATTCACTACCG	CGCCAACGGAACCTGTCATT	CCCAATCGAATTCACTACCG	CGCCAACGGAACCTGTCATT
BY4743_10-5	BY4743	WT	a/α	2n	XV	731262	723951	SNP	1	T	A	2	T/A	53.3/46.7	90/79	169	T	53.2544	90	A	46.7456	79	TTGGTTTTCACCATTGGCTG	TGTGGATAAGTCATCAAGTA	TTGGTTTTCACCATTGGCTG	TGTGGATAAGTCATCAAGTA
BY4743_10-5	BY4743	WT	a/α	2n	XV	766703	759392	SNP	1	T	A	2	T/A	53.0/47.0	96/85	181	T	53.0387	96	A	46.9613	85	GTATATGTATTTTACGTTTT	TCATAATCATATACTTTCTG	GTATATGTATTTTACGTTTT	TCATAATCATATACTTTCTG
BY4743_10-5	BY4743	WT	a/α	2n	XVI	940888	917946	SNP	1	C	A	2	C/A	53.4/46.6	93/81	174	C	53.4483	93	A	46.5517	81	GTAGCTGTGACCAAGAACTA	TTTTAAAGAGGGTCTGGGGA	GTAGCTGTGACCAAGAACTA	TTTTAAAGAGGGTCTGGGGA
BY4743_10-5	BY4743	WT	a/α	2n	VIII	148052	145651	DIP	1	G	-	2	-/G	53.3/46.7	80/70	150	-	53.3333	80	G	46.6667	70	ATCTTGGGCCTTGAACCAAA	TCTTTAACTTGTGCTTTCTG	ATCTTGGGCCTTGAACCAAA	TCTTTAACTTGTGCTTTCTG
BY4743_10-5	BY4743	WT	a/α	2n	VIII	352614	348745	DIP	1	-	T	2	-/T	50.3/48.3	76/73	151	-	50.3311	76	T	48.3444	73	AGTTTGTCGCGCGAATGATA	TTAGCGGAAACAAAACGATC	AGTTTGTCGCGCGAATGATA	TAACGGAAACAAAACGATCA
BY4743_10-5	BY4743	WT	a/α	2n	XIII	918121	902955	DIP	1	-	T	2	T/-	46.3/46.3	44/44	95	T	46.3158	44	-	46.3158	44	GAATGATCTCACAGCATTGC	TTTTTTTTTTTTTTTTTTTA	GAATGATCTCACAGCATTGC	TTTTTTTTTTTTTTTTTTTA
BY4743_10-5	BY4743	WT	a/α	2n	Mito	52231	52235	DIP	1	G	-	1	-	95.2	1079	1133	-	95.2339	1079				TTATATTAATATTTATAGAT	GGGGGTCCCTATTATTATTG	TTATATTAATATTTATAGAT	GGGGGTCCCTATTATTATTG
BY4743_10-6	BY4743	WT	a/α	2n	I	12	11	SNP	1	C	A	1	A	82.7	43	52	A	82.6923	43				CCACACCACAC	CACACACCCACACACCACAC	CCACACC-CAC	CACCACACCCACACACCACA
BY4743_10-6	BY4743	WT	a/α	2n	III	309304	298647	SNP	1	T	C	1	C	56.3	71	126	C	56.3492	71				GCCGCGTGGTGAAGGTTGGA	CCAAGTGCCACACTGGGGTA	GCCGCGTGGTGAAGGTTGGA	CCAAGTGCCACACTGGGGTA
BY4743_10-6	BY4743	WT	a/α	2n	III	315322	304665	SNP	1	T	C	2	T/C	51.1/48.9	71/68	139	T	51.0791	71	C	48.9209	68	TATAGTACATCCGCGCACAT	CTTCCTAGCGGAAGACATAT	TATAGTACATCCGCGCACAT	CTTCCTAGCGGAAGACATAT
BY4743_10-6	BY4743	WT	a/α	2n	IV	35212	33416	SNP	1	G	T	1	T	99.4	163	164	T	99.3902	163				CAGGTTAGTTTCAATTGATC	TATTCCGCGGCTAAAGTTTG	CAGGTTAGTTTCAATTGATC	TATTCCGCGGCTAAAGTTTG
BY4743_10-6	BY4743	WT	a/α	2n	IV	255871	254075	SNP	1	G	T	2	G/T	50.0/48.9	44/43	88	G	50	44	T	48.8636	43	ACATTTTCTACTATCAATGC	ACATAACAAGTCTAGATGAA	ACATTTTCTACTATCAATGC	ACATAACAAGTCTAGATGAA
BY4743_10-6	BY4743	WT	a/α	2n	IV	556255	547603	SNP	1	G	A	2	G/A	54.4/45.6	37/31	68	G	54.4118	37	A	45.5882	31	CGGAGTTTTCACCGGTGAAA	CACCAGAAGCCTTCAAGTAG	CGGAGTTTTCACCGGTGAAA	CACCAGAAGCCTTCAAGTAG
BY4743_10-6	BY4743	WT	a/α	2n	IV	673804	661839	SNP	1	A	T	1	T	96.3	77	80	T	96.25	77				GTCAAGTGGTTGTTGTGTGC	AATCGGAAGAGAATAGTTAT	GTCAAGTGGTTGTTGTGTGC	AATCGGAAGAGAATAGTTAT
BY4743_10-6	BY4743	WT	a/α	2n	IV	789756	777792	SNP	1	A	G	1	G	97.5	78	80	G	97.5	78				TTTAACCAAAAACGGGTTTA	CGTAGCAGATGTACGAGTGA	TTTAACCAAAAACGGGTTTA	CGTAGCAGATGTACGAGTGA
BY4743_10-6	BY4743	WT	a/α	2n	IV	855771	843808	SNP	1	T	C	1	C	96.3	79	82	C	96.3415	79				CTATTGAATTGTCATTTTGA	CCTGACTTTGATTTTCAAAT	CTATTGAATTGTCATTTTGA	CCTGACTTTGATTTTCAAAT
BY4743_10-6	BY4743	WT	a/α	2n	IV	1337978	1312459	SNP	1	A	G	1	G	100	112	112	G	100	112				AGTCACGTGGAAAGGCCTTC	CATGGTGATCCATCTTCTAC	AGTCACGTGGAAAGGCCTTC	CATGGTGATCCATCTTCTAC
BY4743_10-6	BY4743	WT	a/α	2n	IV	1479604	1454085	SNP	1	G	T	1	T	97.4	152	156	T	97.4359	152				TACCACAACTACCAGAAGAA	AGTACGCGAAATTAGAAAAA	TACCACAACTACCAGAAGAA	AGTACGCGAAATTAGAAAAA
BY4743_10-6	BY4743	WT	a/α	2n	VII	227686	227688	SNP	1	A	G	2	A/G	54.7/45.3	75/62	137	A	54.7445	75	G	45.2555	62	ATATTATATGTTAGATATAC	AAGTTTTTTATATGTAATTA	ATATTATATGTTAGATATAC	AAGTTTTTTATATGTAATTA
BY4743_10-6	BY4743	WT	a/α	2n	VII	704192	696390	SNP	1	T	C	2	T/C	52.3/47.7	46/42	88	T	52.2727	46	C	47.7273	42	ATTGACTACAGAAGAAGAGG	TCTGGAGGAGTACGAATGGG	ATTGACTACAGAAGAAGAGG	TCTGGAGGAGTACGAATGGG
BY4743_10-6	BY4743	WT	a/α	2n	VII	847473	833077	SNP	1	G	A	2	G/A	53.9/46.1	62/53	115	G	53.913	62	A	46.087	53	TGTCTAGCTGGCAAGTAGGA	TTTGGCATAGCTCTAAATTT	TGTCTAGCTGGCAAGTAGGA	TTTGGCATAGCTCTAAATTT
BY4743_10-6	BY4743	WT	a/α	2n	VIII	232108	228709	SNP	1	T	A	2	A/T	52.2/47.8	70/64	134	A	52.2388	70	T	47.7612	64	TCGTGTTTTGCTTAGTTAAC	TATATACAAGTCAAAGCAAA	TCGTGTTTTGCTTAGTTAAC	TATATACAAGTCAAAGCAAA
BY4743_10-6	BY4743	WT	a/α	2n	VIII	232113	228714	SNP	1	T	A	2	T/A	54.7/45.3	75/62	137	T	54.7445	75	A	45.2555	62	TTTTGCTTAGTTAACTTATA	ACAAGTCAAAGCAAAAAAGA	TTTTGCTTAGTTAACATATA	ACAAGTCAAAGCAAAAAAGA
BY4743_10-6	BY4743	WT	a/α	2n	VIII	374662	371263	SNP	1	G	A	2	G/A	54.0/46.0	75/64	139	G	53.9568	75	A	46.0432	64	TAAGAGATGCAATCATGATT	TTCTTCGTCAGACGAATCTT	TAAGAGATGCAATCATGATT	TTCTTCGTCAGACGAATCTT
BY4743_10-6	BY4743	WT	a/α	2n	VIII	505571	502170	SNP	1	A	T	2	A/T	51.1/48.9	71/68	139	A	51.0791	71	T	48.9209	68	TCTATTGTTATACTTAGTCG	CGTTATATGAAAAAGAAACT	TCTATTGTTATACTTAGTCG	CGTTATATGAAAAAGAAACT
BY4743_10-6	BY4743	WT	a/α	2n	IX	8659	2365	SNP	1	T	C	2	C/T	51.7/48.3	15/14	29	C	51.7241	15	T	48.2759	14	ACCGTCATTGATCAAATAGG	CTATAATATTAATATACATT	ACCGTCATTGATCAAATAGG	CTATAATATTAATATACATT
BY4743_10-6	BY4743	WT	a/α	2n	IX	269787	254698	SNP	1	A	T	2	A/T	54.7/45.3	64/53	117	A	54.7009	64	T	45.2991	53	GAATGCATTTCCACGTATCG	GGCCACTCGGATAGCGTTCT	GAATGCATTTCCACGTATCG	GGCCACTCGGATAGCGTTCT
BY4743_10-6	BY4743	WT	a/α	2n	IX	352380	337291	SNP	1	C	A	2	C/A	51.4/48.6	71/67	138	C	51.4493	71	A	48.5507	67	CTAACTTTTCTTGTGATTCG	TTTTAGGTTTTATGATATTA	CTAACTTTTCTTGTGATTCG	TTTTAGGTTTTATGATATTA
BY4743_10-6	BY4743	WT	a/α	2n	IX	357534	342445	SNP	1	C	A	1	A	59.3	86	145	A	59.3103	86				ACTTTTATCGTTAACTTTTA	AAATTTTTTTTCGTCTCGTA	ACTTTTATCGTTAACTTTTA	AAATTTTTTTTCGTCTCGTA
BY4743_10-6	BY4743	WT	a/α	2n	X	72356	59162	SNP	1	A	G	2	A/G	52.5/47.5	73/66	139	A	52.518	73	G	47.482	66	CATTCCACTTCATTCAGGCA	TGATTACATTTCATTTACTG	CATTCCACTTCATTCAGGCA	TGATTACATTTCATTTACTG
BY4743_10-6	BY4743	WT	a/α	2n	X	89874	76680	SNP	1	T	C	2	T/C	53.7/46.3	58/50	108	T	53.7037	58	C	46.2963	50	CTGTTAAACCACATAGCATG	CATTTTTTTTACATTCTTCA	CTGTTAAACCACATAGCATG	CATTTTTTTTACATTCTTCA
BY4743_10-6	BY4743	WT	a/α	2n	XI	14065	14066	SNP	1	G	T	2	G/T	55.0/45.0	88/72	160	G	55	88	T	45	72	GACATATATTATTTCTTTTT	ATACTTCGCTGGGAATCTCA	GACATATATTATTTCTTTTT	ATACTTCGCTGGGAATCTCA
BY4743_10-6	BY4743	WT	a/α	2n	XI	180549	180553	SNP	1	A	G	2	G/A	53.8/46.2	63/54	117	G	53.8462	63	A	46.1538	54	ATCAGTGATTTTTTACAGAT	TCAAGATAATTTCTTTCCGG	ATCAGTGATTTTTTACAGAT	TCAAGATAATTTCTTTCCGG
BY4743_10-6	BY4743	WT	a/α	2n	XI	357590	357594	SNP	1	C	T	2	C/T	52.3/47.7	46/42	88	C	52.2727	46	T	47.7273	42	GATCATCTGTACCCGCTCTT	GTCAAAGATATAGAATCCAT	GATCATCTGTACCCGCTCTT	GTCAAAGATATAGAATCCAT
BY4743_10-6	BY4743	WT	a/α	2n	XII	17	17	SNP	1	C	A	2	C/A	54.8/45.2	143/118	261	C	54.7893	143	A	45.2107	118	CACACACACACACCAC	CCACACACCACACCACACAC	CACACACCCACACCAC	CCCACACCACACCACACACC
BY4743_10-6	BY4743	WT	a/α	2n	XII	61	61	SNP	1	A	C	2	A/C	50.0/50.0	149/149	298	A	50	149	C	50	149	CCACACACCACACCACACCC	ACACACCCACACACACTTTT	CCACACACCACACCACACCC	CACACCCACACACTC-TCTC
BY4743_10-6	BY4743	WT	a/α	2n	XII	203972	196707	SNP	1	G	A	1	A	98.9	88	89	A	98.8764	88				GTGTGGTAATTTGACTGAAA	AGAGGATTTGCAATCTGGCG	GTGTGGTAATTTGACTGAAA	AGAGGATTTGCAATCTGGCG
BY4743_10-6	BY4743	WT	a/α	2n	XII	468736	444558	SNP	1	C	A	1	A	100	16	16	A	100	16				AATAAAAATTGTCCTCCACC	ATAACACCTCTCACTCCCAC	AATAAAAATTGTCCTCCACC	ATAACACCTCTCACTCCCAC
BY4743_10-6	BY4743	WT	a/α	2n	XII	817936	772068	SNP	1	T	C	1	C	99.1	115	116	C	99.1379	115				TTCAGATGGTACTGAAGCGG	ACTAAAGATGCATGAATTGA	TTCAGATGGTACTGAAGCGG	ACTAAAGATGCATGAATTGA
BY4743_10-6	BY4743	WT	a/α	2n	XII	974884	927893	SNP	1	T	C	1	C	100	128	128	C	100	128				AGATTCTGGATTTTTCTATT	TATGAAAAAACTGAGAAGTT	AGATTCTGGATTTTTCTATT	TATGAAAAAACTGAGAAGTT
BY4743_10-6	BY4743	WT	a/α	2n	XIII	159205	155915	SNP	1	A	G	2	A/G	50.8/49.2	61/59	120	A	50.8333	61	G	49.1667	59	GTCCCAAAAAGGAAATAGCC	TAACATATCGTTACTGTTTT	GTCCCAAAAAGGAAATAGCC	TAACATATCGTTACTGTTTT
BY4743_10-6	BY4743	WT	a/α	2n	XIII	163845	160555	SNP	1	A	G	2	A/G	50.4/49.6	62/61	123	A	50.4065	62	G	49.5935	61	ACATTTTAACTTTCTTGACC	TGGAAGCCTGTTCCTTTGGA	ACATTTTAACTTTCTTGACC	TGGAAGCCTGTTCCTTTGGA
BY4743_10-6	BY4743	WT	a/α	2n	XIII	327145	315008	SNP	1	A	T	2	A/T	53.3/46.7	49/43	92	A	53.2609	49	T	46.7391	43	TTGAGCTTGAGAACCTGTAA	GCCGATGTACAAGTTGCTTT	TTGAGCTTGAGAACCTGTAA	GCCGATGTACAAGTTGCTTT
BY4743_10-6	BY4743	WT	a/α	2n	XIII	674950	659407	SNP	1	A	G	1	G	63.8	95	149	G	63.7584	95				AGTAATAAATAAAGGACAAA	AGAAGAAAAAAATATTATTG	AGTAATAAATAAAGGACAAA	AGAAGAAAAAAATATTATTG
BY4743_10-6	BY4743	WT	a/α	2n	XIV	77978	72869	SNP	1	A	T	2	A/T	50.6/49.4	82/80	162	A	50.6173	82	T	49.3827	80	TGTTCCGCAATGAACTAACT	AGTTAAATAAGATACTTGCT	TGTTCCGCAATGAACTAACT	AGTTAAATAAGATACTTGCT
BY4743_10-6	BY4743	WT	a/α	2n	XIV	104470	99188	SNP	1	T	C	2	T/C	53.2/46.8	74/65	139	T	53.2374	74	C	46.7626	65	CGAAAAGTAATTAAGTTGTT	TGCAGAAGTGTGAATAATTG	CGAAAAGTAATTAAGTTGTT	TGCAGAAGTGTGAATAATTG
BY4743_10-6	BY4743	WT	a/α	2n	XIV	134741	129459	SNP	1	T	A	2	A/T	53.0/47.0	79/70	149	A	53.0201	79	T	46.9799	70	CTGCTTAACAATCAGCCATT	CTTCTCAATGCTGTAGCCCA	CTGCTTAACAATCAGCCATT	CTTCTCAATGCTGTAGCCCA
BY4743_10-6	BY4743	WT	a/α	2n	XIV	397139	391854	SNP	1	G	A	2	G/A	54.8/45.2	57/47	104	G	54.8077	57	A	45.1923	47	CCGGTGACGTCATTTTATCT	TGAACGGAAAATTAGTCACT	CCGGTGACGTCATTTTATCT	TGAACGGAAAATTAGTCACT
BY4743_10-6	BY4743	WT	a/α	2n	XV	326698	323546	SNP	1	G	A	2	G/A	53.8/46.2	56/48	104	G	53.8462	56	A	46.1538	48	TAAATGCAAAATAAGTTCAC	TGATATTATTAATAATATTT	TAAATGCAAAATAAGTTCAC	TGATATTATTAATAATATTT
BY4743_10-6	BY4743	WT	a/α	2n	XV	575647	572495	SNP	1	T	C	1	C	61.4	35	57	C	61.4035	35				CCTTTGCCAGAACTGTTGAA	CCGTTAACGTCATCGTTTCC	CCTTTGCCAGAACTGTTGAA	CCGTTAACGTCATCGTTTCC
BY4743_10-6	BY4743	WT	a/α	2n	XV	670767	663934	SNP	1	G	A	2	G/A	54.7/45.3	35/29	64	G	54.6875	35	A	45.3125	29	AGGGAATCTAAGATATCAAA	AAAAAAAAAAAAAAAAAAAG	AGGGAATCTAAGATATCAAA	AAAAAAAAAAAAAAAAAAAG
BY4743_10-6	BY4743	WT	a/α	2n	XV	715342	707609	SNP	1	T	A	1	A	89.7	35	39	A	89.7436	35				AAAAAAATAAACGCATTTTT	TCTTTTGCATTTTATCTTTT	AAAAAAATAAACGCA-TTTT	T-----GCATTTTATCTTTT
BY4743_10-6	BY4743	WT	a/α	2n	XV	773587	765666	SNP	1	T	A	1	A	100	103	103	A	100	103				GAAAAAGTCCTGGGGAAGAT	GCAGAAGCGGTACTAAGAGG	GAAAAAGTCCTGGGGAAGAT	GCAGAAGCGGTACTAAGAGG
BY4743_10-6	BY4743	WT	a/α	2n	XVI	229595	217712	SNP	1	T	C	2	C/T	50.0/50.0	65/65	130	C	50	65	T	50	65	AGTTATTTTTCCCCGTTTTT	TATTGGATTCCAGTTCAGGC	AGTTATTTTTCCCCGTTTTT	TATTGGATTCCAGTTCAGGC
BY4743_10-6	BY4743	WT	a/α	2n	XVI	543197	527951	SNP	1	A	G	1	G	58.3	63	108	G	58.3333	63				AGCATTTTGTATCATTCTAG	AACGGGTTGATGAGAGGAAG	AGCATTTTGTATCATTCTAG	AACGGGTTGATGAGAGGAAG
BY4743_10-6	BY4743	WT	a/α	2n	I	8	8	DIP	1	A	-	1	-	60.6	43	71	-	60.5634	43				CCACACC	CACCCACACACCCACACACC	CCACACC	CACACACCACACCCACACAC
BY4743_10-6	BY4743	WT	a/α	2n	I	15	14	DIP	1	-	C	1	C	56	42	75	C	56	42				CCACACCACACCCA	CACACCCACACACCACACCA	CCACACC-CACACA	CACACCCACACACCACACCA
BY4743_10-6	BY4743	WT	a/α	2n	XV	715334	707602	DIP	15	GCATTTTTTTCTTTT	---------------	1	---------------	48.6	36	74	---------------	48.6486	36				GAAAATGAAAAAAAATAAAC	GCATTTTATCTTTTCCCTTA	GAAAATGAAAAAAAATAAAC	GCATTTTATCTTTTCCCTTA
BY4743_10-7	BY4743	WT	a/α	2n	II	465561	461959	SNP	1	G	A	2	G/A	54.8/45.2	120/99	219	G	54.7945	120	A	45.2055	99	GGATTGAACTGTAAAGTGGC	TCATATGCCATTGCGGCCCT	GGATTGAACTGTAAAGTGGC	TCATATGCCATTGCGGCCCT
BY4743_10-7	BY4743	WT	a/α	2n	II	555563	551961	SNP	1	G	C	2	G/C	54.8/45.2	119/98	217	G	54.8387	119	C	45.1613	98	TGGAGCAATTACCTGCATAG	CACTCATAGGCCACAAGGGT	TGGAGCAATTACCTGCATAG	CACTCATAGGCCACAAGGGT
BY4743_10-7	BY4743	WT	a/α	2n	II	611972	608370	SNP	1	A	T	2	A/T	52.8/47.2	113/101	214	A	52.8037	113	T	47.1963	101	AGAACCTTTTTCGCAAGTTC	AAGGTGCTCTAATTTTTAAA	AGAACCTTTTTCGCAAGTTC	AGGTGCTCTAATTTTTAAAA
BY4743_10-7	BY4743	WT	a/α	2n	IV	835	835	SNP	1	A	G	2	G/A	52.4/47.6	87/79	166	G	52.4096	87	A	47.5904	79	ACTTATGCCAATATTACAAA	AAATCACCACTAAAATCACC	ACTTATGCCAATATTACAAA	AAATCACCACTAAAATCACC
BY4743_10-7	BY4743	WT	a/α	2n	IV	158060	155076	SNP	1	G	A	2	G/A	54.8/45.2	125/103	228	G	54.8246	125	A	45.1754	103	GCTAACGTTGAGACATAGAA	TAATTATTTAATTAACCATT	GCTAACGTTGAGACATAGAA	TAATTATTTAATTAACCATT
BY4743_10-7	BY4743	WT	a/α	2n	IV	551233	540952	SNP	1	G	A	2	A/G	50.6/49.4	91/89	180	A	50.5556	91	G	49.4444	89	TAAATGCACAGCGGTGCCTT	TTTCGCCGTGGATTGTTAAA	TAAATGCACAGCGGTGCCTT	TTTCGCCGTGGATTGTTAAA
BY4743_10-7	BY4743	WT	a/α	2n	IV	612121	601840	SNP	1	G	A	2	G/A	51.3/48.7	80/76	156	G	51.2821	80	A	48.7179	76	CTATTAAGACAAAAACCGTC	CTTTTGATAACAAGACTAAT	CTATTAAGACAAAAACCGTC	CTTTTGATAACAAGACTAAT
BY4743_10-7	BY4743	WT	a/α	2n	IV	614518	604237	SNP	1	C	T	2	C/T	49.1/46.8	85/81	173	C	49.1329	85	T	46.8208	81	TTCTTTTGCAAACCGGACAT	CTTTTTTTATTGGTTTTGGA	TTCTTTTGCAAACCGGACAT	TTTTTTTATTGGTTTTGGAG
BY4743_10-7	BY4743	WT	a/α	2n	IV	615850	605569	SNP	1	G	T	2	G/T	53.8/46.2	106/91	197	G	53.8071	106	T	46.1929	91	ATCATTATTGAACCCCTCAT	GTAAGAGTTTCTTTCCCTAA	ATCATTATTGAACCCCTCAT	GTAAGAGTTTCTTTCCCTAA
BY4743_10-7	BY4743	WT	a/α	2n	IV	656024	642073	SNP	1	C	A	2	C/A	50.3/49.7	82/81	163	C	50.3067	82	A	49.6933	81	TAAGGATTTAAGCTTGATGG	TGAAACACCCAATTTTGGTA	TAAGGATTTAAGCTTGATGG	TGAAACACCCAATTTTGGTA
BY4743_10-7	BY4743	WT	a/α	2n	IV	673230	659279	SNP	1	A	C	2	A/C	54.0/46.0	102/87	189	A	53.9683	102	C	46.0317	87	GATATTGAAAGTACCTATTC	GAGATCAAATTTTTGCATGG	GATATTGAAAGTACCTATTC	GAGATCAAATTTTTGCATGG
BY4743_10-7	BY4743	WT	a/α	2n	IV	1084820	1065335	SNP	1	G	C	2	G/C	52.0/48.0	91/84	175	G	52	91	C	48	84	AAACGTAGTTAAGGCCACGT	GGAAAGATATGAAAGGAGTG	AAACGTAGTTAAGGCCACGT	GGAAAGATATGAAAGGAGTG
BY4743_10-7	BY4743	WT	a/α	2n	IV	1307799	1278474	SNP	1	T	C	1	C	93.8	60	64	C	93.75	60				ACGTCTTCACCATCGGCACC	GTTGCAGTATCCTCGACGTA	ACGTCTTCACCATCGGCACC	GTTGCAGTATCCTCGACGTA
BY4743_10-7	BY4743	WT	a/α	2n	IV	1373193	1343745	SNP	1	C	G	1	G	99.2	243	245	G	99.1837	243				CGATTATAATATTATGAAAG	TTTAACAGTTCCTATTAAGG	CGATTATAATATTATGAAAG	TTTAACAGTTCCTATTAAGG
BY4743_10-7	BY4743	WT	a/α	2n	V	124453	123356	SNP	1	A	G	2	G/A	50.4/49.6	130/128	258	G	50.3876	130	A	49.6124	128	CATCAACTTCATCCGCTACG	CCTGAACATCGAGTTGGACC	CATCAACTTCATCCGCTACG	CCTGAACATCGAGTTGGACC
BY4743_10-7	BY4743	WT	a/α	2n	VI	33417	32713	SNP	1	C	A	2	C/A	50.6/49.4	117/114	231	C	50.6494	117	A	49.3506	114	TGACTGATTTGGCCCCACTA	CTGCGGCTTCGTTGAGCGTT	TGACTGATTTGGCCCCACTA	CTGCGGCTTCGTTGAGCGTT
BY4743_10-7	BY4743	WT	a/α	2n	VII	3348	3352	SNP	1	T	A	1	A	55.8	134	240	A	55.8333	134				CTGAAAAAGCTTTGCAGGTT	ATTTTACACAGATAGAGAGA	CTGAAAAAGCTTTGCAGGTT	ATTTTACACAGATAGAGAGA
BY4743_10-7	BY4743	WT	a/α	2n	VII	83013	83017	SNP	1	T	C	2	T/C	54.5/45.5	150/125	275	T	54.5455	150	C	45.4545	125	TCCAAATTTAGCGATATTTT	TCTGGTATAACGTATTTATC	TCCAAATTTAGCGATATTTT	TCTGGTATAACGTATTTATC
BY4743_10-7	BY4743	WT	a/α	2n	VII	126689	126693	SNP	1	A	T	2	A/T	52.6/47.4	123/111	234	A	52.5641	123	T	47.4359	111	ACACCTAGTACGTCAGATGA	CCAAGCTCTTCCTCCTCTTC	ACACCTAGTACGTCAGATGA	CCAAGCTCTTCCTCCTCTTC
BY4743_10-7	BY4743	WT	a/α	2n	VII	345248	345252	SNP	1	T	C	2	T/C	53.6/46.4	120/104	224	T	53.5714	120	C	46.4286	104	ACAGATATAGGAAGGACACC	CAAACTACACCAGAATCAAG	ACAGATATAGGAAGGACACC	CAAACTACACCAGAATCAAG
BY4743_10-7	BY4743	WT	a/α	2n	VII	440781	440785	SNP	1	G	C	2	G/C	51.4/48.6	90/85	175	G	51.4286	90	C	48.5714	85	GAAGTTTTTTCTTCAGTCTG	CGCTCTCCCAACTGAGCTAA	GAAGTTTTTTCTTCAGTCTG	CGCTCTCCCAACTGAGCTAA
BY4743_10-7	BY4743	WT	a/α	2n	VII	1051629	1035431	SNP	1	G	T	1	T	98.1	211	215	T	98.1395	211				TTTCCATCCAAACTTTTCTA	AAATTGGTGCCCGAATCTCG	TTTCCATCCAAACTTTTCTA	AAATTGGTGCCCGAATCTCG
BY4743_10-7	BY4743	WT	a/α	2n	VIII	351884	347728	SNP	1	G	C	2	G/C	51.7/48.3	105/98	203	G	51.7241	105	C	48.2759	98	ACAATTTATGGGTAATTACC	GACCGAATATGGGTGGTAAA	ACAATTTATGGGTAATTACC	GACCGAATATGGGTGGTAAA
BY4743_10-7	BY4743	WT	a/α	2n	VIII	530288	526130	SNP	1	T	C	2	C/T	51.3/48.7	120/114	234	C	51.2821	120	T	48.7179	114	ATTAAATCTTGGGACCATTT	CTCAATCTTCATGTCGTCTT	ATTAAATCTTGGGACCATTT	CTCAATCTTCATGTCGTCTT
BY4743_10-7	BY4743	WT	a/α	2n	X	24833	10713	SNP	1	A	C	1	C	94.2	129	137	C	94.1606	129				ATCTTTTCAGAATCTTCACC	TAATCACGTTTAATGGCGGC	ATCTTTTCAGAATCTTCACC	TAATCACGTTTAATGGCGGC
BY4743_10-7	BY4743	WT	a/α	2n	X	738075	713467	SNP	1	G	T	2	T/G	50.7/49.3	154/150	304	T	50.6579	154	G	49.3421	150	GAGAGACGTCTTTAGGGGGG	TTTTGACAACAAACGGATCT	GAGAGACGTCTTTAGGGGGG	TTTTGACAACAAACGGATCT
BY4743_10-7	BY4743	WT	a/α	2n	XI	259113	259116	SNP	1	A	G	2	G/A	50.3/49.7	74/73	147	G	50.3401	74	A	49.6599	73	AAATTGAAAAATAAGATACA	TAATCGTATATAAATCAGGC	AAATTGAAAAATAAGATACA	TAATCGTATATAAATCAGGC
BY4743_10-7	BY4743	WT	a/α	2n	XI	310860	310863	SNP	1	T	A	2	T/A	52.2/47.8	105/96	201	T	52.2388	105	A	47.7612	96	AAATAATCAACAAGGAAGTC	ATTTGGACAGCAATCTCAAA	AAATAATCAACAAGGAAGTC	ATTTGGACAGCAATCTCAAA
BY4743_10-7	BY4743	WT	a/α	2n	XI	375220	375223	SNP	1	C	T	2	C/T	54.7/45.3	134/111	245	C	54.6939	134	T	45.3061	111	CAAATATGGACTGTGAATTT	CAGTATTTACGTAAACAATA	CAAATATGGACTGTGAATTT	CAGTATTTACGTAAACAATA
BY4743_10-7	BY4743	WT	a/α	2n	XI	556180	556177	SNP	1	A	T	2	A/T	53.6/46.4	127/110	237	A	53.5865	127	T	46.4135	110	ACTTTGTTGAACTAAGGGAG	CAAAAACTTCTTAAAAAAGT	ACTTTGTTGAACTAAGGGAG	CAAAAACTTCTTAAAAAAGT
BY4743_10-7	BY4743	WT	a/α	2n	XII	61657	54848	SNP	1	G	T	2	T/G	53.1/46.9	129/114	243	T	53.0864	129	G	46.9136	114	CAACCTTCTACAGTTGCCTC	GCGGCGTTTACGATATTGCC	CAACCTTCTACAGTTGCCTC	GCGGCGTTTACGATATTGCC
BY4743_10-7	BY4743	WT	a/α	2n	XII	64713	57904	SNP	1	T	C	2	C/T	50.4/49.1	117/114	232	C	50.431	117	T	49.1379	114	GAAGATTCAACCTCTAGGGT	ATAGTCTTACCTGTCAGTGT	GAAGATTCAACCTCTAGGGT	ATAGTCTTACCTGTCAGTGT
BY4743_10-7	BY4743	WT	a/α	2n	XII	919643	872050	SNP	1	A	C	1	C	99	199	201	C	99.005	199				GCCGTTTTGGCTCAGAGGTG	AGCACTGTCTAAGATAGCTA	GCCGTTTTGGCTCAGAGGTG	AGCACTGTCTAAGATAGCTA
BY4743_10-7	BY4743	WT	a/α	2n	XII	987975	938276	SNP	1	T	C	1	C	64.7	180	278	C	64.7482	180				GCTGCCAAGATAGTCCGTTA	TGTGAGCTGGGTCAGAGGGG	GCTGCCAAGATAGTCCGTTA	TGTGAGCTGGGTCAGAGGGG
BY4743_10-7	BY4743	WT	a/α	2n	XII	993571	943872	SNP	1	A	G	1	G	56.7	119	210	G	56.6667	119				TCTTACATTCCTCAGATTGA	CAAGTTTATCAAGGCACAAA	TCTTACATTCCTCAGATTGA	CAAGTTTATCAAGGCACAAA
BY4743_10-7	BY4743	WT	a/α	2n	XIII	206441	194013	SNP	1	A	G	2	A/G	52.9/47.1	128/114	242	A	52.8926	128	G	47.1074	114	ATAACCATCACTTTTCTTCA	TGGTTCTCTTGAAATTGGCA	ATAACCATCACTTTTCTTCA	TGGTTCTCTTGAAATTGGCA
BY4743_10-7	BY4743	WT	a/α	2n	XIII	556099	540051	SNP	1	G	A	1	A	98.4	183	186	A	98.3871	183				TGTCCAAATTTTTCAAAAGC	ACACAGAACCCCAACCGGAG	TGTCCAAATTTTTCAAAAGC	ACACAGAACCCCAACCGGAG
BY4743_10-7	BY4743	WT	a/α	2n	XIV	11177	5857	SNP	1	C	G	1	G	57.1	149	261	G	57.0881	149				GTCAAATATGCGGAGTTATA	CATCAAACAACTTTGGACGG	GTCAAATATGCGGAGTTATA	CATCAAACAACTTTGGACGG
BY4743_10-7	BY4743	WT	a/α	2n	XIV	127903	121828	SNP	1	C	A	1	A	59.1	143	242	A	59.0909	143				TCTAAATGCCATGCGCCTAC	TTCAATGATCTCAGGAAAGC	TCTAAATGCCATGCGCCTAC	TTCAATGATCTCAGGAAAGC
BY4743_10-7	BY4743	WT	a/α	2n	XIV	685174	678480	SNP	1	T	C	2	T/C	51.8/48.2	147/137	284	T	51.7606	147	C	48.2394	137	GAGGTATACCCGGAAGACGA	TGAATAGCTGTACTGTATTT	GAGGTATACCCGGAAGACGA	TGAATAGCTGTACTGTATTT
BY4743_10-7	BY4743	WT	a/α	2n	XV	142696	139402	SNP	1	T	A	2	T/A	53.6/46.1	143/123	267	T	53.5581	143	A	46.0674	123	TCAAGAAAAAACGCGTTTAA	CTAACAGTGTGATGTGGTAA	TCAAGAAAAAACGCGTTTAA	CTAACAGTGTGATGTGGTAA
BY4743_10-7	BY4743	WT	a/α	2n	XV	171475	168181	SNP	1	G	A	2	G/A	51.3/48.7	120/114	234	G	51.2821	120	A	48.7179	114	ACGACATTTCGACTCACGTA	AACATGACCAAGAACAGAAG	ACGACATTTCGACTCACGTA	AACATGACCAAGAACAGAAG
BY4743_10-7	BY4743	WT	a/α	2n	XV	510882	507588	SNP	1	C	G	2	C/G	50.8/49.2	97/94	191	C	50.7853	97	G	49.2147	94	ATGGGCAAAATTGGCAAAAG	GGCGGTCTCTCAGTGTTTTC	ATGGGCAAAATTGGCAAAAG	GGCGGTCTCTCAGTGTTTTC
BY4743_10-7	BY4743	WT	a/α	2n	XV	644930	637341	SNP	1	C	G	1	G	98.6	215	218	G	98.6239	215				CCAAGATTTTGAGAGAAAAG	CGCTTTATTTGCCATTGCAG	CCAAGATTTTGAGAGAAAAG	CGCTTTATTTGCCATTGCAG
BY4743_10-7	BY4743	WT	a/α	2n	XV	723102	714401	SNP	1	T	C	2	C/T	50.3/49.7	84/83	167	C	50.2994	84	T	49.7006	83	AGCAACAACCGTCGTGGTGG	TACGGCAACGGTGGTTTCTT	AGCAACAACCGTCGTGGTGG	TACGGCAACGGTGGTTTCTT
BY4743_10-7	BY4743	WT	a/α	2n	XVI	17119	9351	SNP	1	G	A	2	G/A	52.6/47.4	122/110	232	G	52.5862	122	A	47.4138	110	AGCGTTTCACTTTGTTTGGA	AACGGTTGTTAACTTGTATT	AGCGTTTCACTTTGTTTGGA	AACGGTTGTTAACTTGTATT
BY4743_10-7	BY4743	WT	a/α	2n	XVI	164976	152781	SNP	1	A	G	2	G/A	53.9/46.1	131/112	243	G	53.9095	131	A	46.0905	112	TATCATGGAAAAGAAATTAA	CGTTAGCGTGGAAACTCTAT	TATCATGGAAAAGAAATTAA	CGTTAGCGTGGAAACTCTAT
BY4743_10-7	BY4743	WT	a/α	2n	XVI	181886	169691	SNP	1	A	G	2	A/G	52.9/47.1	137/122	259	A	52.8958	137	G	47.1042	122	TACAATTGATTGAGAAAAAC	GAGGGAAAGATACGTTTATG	TACAATTGATTGAGAAAAAC	GAGGGAAAGATACGTTTATG
BY4743_10-7	BY4743	WT	a/α	2n	XVI	208846	196651	SNP	1	T	A	2	T/A	50.7/49.3	109/106	215	T	50.6977	109	A	49.3023	106	TTTTTGAGACGGTATTCTCA	GATACCTCTTCAAATGAAGG	TTTTTGAGACGGTATTCTCA	GATACCTCTTCAAATGAAGG
BY4743_10-7	BY4743	WT	a/α	2n	XVI	210233	198038	SNP	1	C	T	2	C/T	52.6/47.4	111/100	211	C	52.6066	111	T	47.3934	100	CCCGGTCTCCACGGTGAAAG	GTGATGTGATAGCCGTTACA	CCCGGTCTCCACGGTGAAAG	GTGATGTGATAGCCGTTACA
BY4743_10-7	BY4743	WT	a/α	2n	XVI	224823	212628	SNP	1	C	T	2	T/C	50.9/48.6	89/85	175	T	50.8571	89	C	48.5714	85	CCAAGCAAACAATAGACCAG	AAGGCACCAAGATCCCGGAT	CCAAGCAAACAATAGACCAG	AAGGCACCAAGATCCCGGAT
BY4743_10-7	BY4743	WT	a/α	2n	I	212088	209519	DIP	1	T	-	1	-	88.2	15	17	-	88.2353	15				AGTACAATAAATCTGTTGTC	TCCCGAGGATTATAATTGTT	AGTACAATAAATCTGTTGTC	TCCCGAGGATTATAATTGTT
BY4743_10-7	BY4743	WT	a/α	2n	IV	614518	604237	DIP	1	-	A	2	-/A	52.8/45.5	93/80	176	-	52.8409	93	A	45.4545	80	TTCTTTTGCAAACCGGACAT	CTTTTTTTATTGGTTTTGGA	TTCTTTTGCAAACCGGACAT	TTTTTTTATTGGTTTTGGAG
BY4743_10-7	BY4743	WT	a/α	2n	VII	56468	56473	DIP	1	T	-	1	-	55.8	121	217	-	55.7604	121				ATAGCTTAAGAGAACCATTC	CCCTCCCCTCACAATGCTCA	ATAGCTTAAGAGAACCATTC	CCCTCCCCTCACAATGCTCA
BY4743_10-7	BY4743	WT	a/α	2n	XI	135445	135449	DIP	1	G	-	1	-	55.8	153	274	-	55.8394	153				AAAGTTCTTAAAATCTGAAA	TCACTTAGGGAATACTTTCC	AAAGTTCTTAAAATCTGAAA	TCACTTAGGGAATACTTTCC
BY4743_10-7	BY4743	WT	a/α	2n	XII	5664	2089	DIP	1	-	C	2	C/-	52.5/47.5	21/19	40	C	52.5	21	-	47.5	19	TACAGTGACATATATATACA	CCACACCCACACACCACACC	TACAGTGACATATATATACA	CCACACCCACACACC-CACA
BY4743_10-8	BY4743	WT	a/α	2n	I	224921	219162	SNP	1	C	T	2	C/T	52.5/47.5	42/38	80	C	52.5	42	T	47.5	38	CATTTTCTCTTTCTCACTTC	GACTACTTCTTATATCTACT	CATTTTCTCTTTCTCACTTC	GACTACTTCTTATATCTACT
BY4743_10-8	BY4743	WT	a/α	2n	II	774797	771783	SNP	1	A	C	1	C	55.8	67	120	C	55.8333	67				ATTCTTCCAGGAAGCCTTTC	ACAAGAAGAGCCAATTGAGA	ATTCTTCCAGGAAGCCTTTC	ACAAGAAGAGCCAATTGAGA
BY4743_10-8	BY4743	WT	a/α	2n	IV	79029	76878	SNP	1	G	A	2	G/A	54.1/45.9	86/73	159	G	54.0881	86	A	45.9119	73	ATGATAACAAATCTAAAGGT	CTCAAAAGAGGAAGAACGCC	ATGATAACAAATCTAAAGGT	CTCAAAAGAGGAAGAACGCC
BY4743_10-8	BY4743	WT	a/α	2n	IV	172269	170118	SNP	1	G	A	2	A/G	53.8/46.2	77/66	143	A	53.8462	77	G	46.1538	66	CGCCCATTAGTTCTAAGATT	TGTTGTCCTTTTTCTTACGA	CGCCCATTAGTTCTAAGATT	TGTTGTCCTTTTTCTTACGA
BY4743_10-8	BY4743	WT	a/α	2n	IV	173872	171721	SNP	1	T	C	1	C	100	116	116	C	100	116				CATGAATTGCTACATCATGA	CTTATAATGAAATACGTATC	CATGAATTGCTACATCATGA	CTTATAATGAAATACGTATC
BY4743_10-8	BY4743	WT	a/α	2n	IV	200740	198589	SNP	1	G	A	2	G/A	52.2/47.1	71/64	136	G	52.2059	71	A	47.0588	64	CTCCTCCAAAGCCCGACACA	AAAATAATATCATCGTTAAT	CTCCTCCAAAGCCCGACACA	AAAATAATATCATCGTTAAT
BY4743_10-8	BY4743	WT	a/α	2n	IV	203054	200903	SNP	1	T	A	2	A/T	50.4/49.6	68/67	135	A	50.3704	68	T	49.6296	67	CTAATATGAATGTATTAGTC	ATAATGGCCCAGGGACTACG	CTAATATGAATGTATTAGTC	ATAATGGCCCAGGGACTACG
BY4743_10-8	BY4743	WT	a/α	2n	IV	244398	242247	SNP	1	A	G	2	G/A	51.1/48.9	48/46	94	G	51.0638	48	A	48.9362	46	AATCAAAAAAAGGATCATAG	ACATTCTGATGTTGAAAACG	AATCAAAAAAAGGATCATAG	ACATTCTGATGTTGAAAACG
BY4743_10-8	BY4743	WT	a/α	2n	IV	834627	821913	SNP	1	G	A	2	G/A	53.8/46.2	56/48	104	G	53.8462	56	A	46.1538	48	TATCTTCGTTAACAGCATCT	AATATTCATGTAGCGCTTTT	TATCTTCGTTAACAGCATCT	AATATTCATGTAGCGCTTTT
BY4743_10-8	BY4743	WT	a/α	2n	IV	948159	934300	SNP	1	G	A	2	G/A	54.3/45.7	44/37	81	G	54.321	44	A	45.679	37	ATCATATCTCCTACAACGCT	ATGCCATTTAGGCCTGGTGA	ATCATATCTCCTACAACGCT	ATGCCATTTAGGCCTGGTGA
BY4743_10-8	BY4743	WT	a/α	2n	IV	953235	939376	SNP	1	G	A	2	G/A	52.7/47.3	58/52	110	G	52.7273	58	A	47.2727	52	ATGAGCAAGAATGGGCTATC	AAGGCATATCAATAGAAAAT	ATGAGCAAGAATGGGCTATC	AAGGCATATCAATAGAAAAT
BY4743_10-8	BY4743	WT	a/α	2n	IV	997938	980089	SNP	1	A	T	2	T/A	52.7/47.3	49/44	93	T	52.6882	49	A	47.3118	44	TGACATCAGCGCCTTGTGAA	CTAGAAAATCCACTACAGAA	TGACATCAGCGCCTTGTGAA	CTAGAAAATCCACTACAGAA
BY4743_10-8	BY4743	WT	a/α	2n	IV	1111797	1089362	SNP	1	G	T	2	G/T	50.0/50.0	57/57	114	G	50	57	T	50	57	TAAGAATCTGAAAAATTTTT	GAATGTGAATTTTGTTTACA	TAAGAATCTGAAAAATTTTT	GAATGTGAATTTTGTTTACA
BY4743_10-8	BY4743	WT	a/α	2n	IV	1176309	1152981	SNP	1	C	A	2	C/A	53.4/46.6	63/55	118	C	53.3898	63	A	46.6102	55	TCGTCAAAGTTTTTGGGAAA	GGCCAGCCTTGGTCTTTTAT	TCGTCAAAGTTTTTGGGAAA	GGCCAGCCTTGGTCTTTTAT
BY4743_10-8	BY4743	WT	a/α	2n	V	545203	536314	SNP	1	A	G	2	G/A	52.9/47.1	2017-09-08	17	G	52.9412	9	A	47.0588	8	AAAAGGGGGGGGGGGGGGGG	GACAGCGCAGCCACGTGACG	AAAAGGGGGGGGGGGGGGGG	GACAGCGCAGCCACGTGACG
BY4743_10-8	BY4743	WT	a/α	2n	VI	203936	198918	SNP	1	A	G	2	A/G	54.1/45.9	79/67	146	A	54.1096	79	G	45.8904	67	CGTGTGCGTCATCACTTAGA	CAAATCTGGATCCACAGTGC	CGTGTGCGTCATCACTTAGA	CAAATCTGGATCCACAGTGC
BY4743_10-8	BY4743	WT	a/α	2n	VII	3971	3975	SNP	1	A	G	2	A/G	53.3/46.7	80/70	150	A	53.3333	80	G	46.6667	70	TACTATTCTTAAAGACCAAA	AAAAGCTGTTAATAACCCAA	TACTATTCTTAAAGACCAAA	AAAAGCTGTTAATAACCCAA
BY4743_10-8	BY4743	WT	a/α	2n	VII	43635	43640	SNP	1	C	A	2	A/C	50.4/49.6	60/59	119	A	50.4202	60	C	49.5798	59	AATACTGGCATTACGAGGTG	TAATACAGTTTTATTAAACC	AATACTGGCATTACGAGGTG	TAATACAGTTTTATTAAACC
BY4743_10-8	BY4743	WT	a/α	2n	VII	188421	188426	SNP	1	T	C	2	T/C	50.7/49.3	73/71	144	T	50.6944	73	C	49.3056	71	GTTTCAACGCAGGAGCGTCG	TAACACCATCACCAGTCATT	GTTTCAACGCAGGAGCGTCG	TAACACCATCACCAGTCATT
BY4743_10-8	BY4743	WT	a/α	2n	VII	332394	332399	SNP	1	T	C	2	T/C	53.7/46.3	73/63	136	T	53.6765	73	C	46.3235	63	AAGGCAAAATATTCTGTCCA	TGCTTTTCTTGTTCAATTGT	AAGGCAAAATATTCTGTCCA	TGCTTTTCTTGTTCAATTGT
BY4743_10-8	BY4743	WT	a/α	2n	VII	480828	480834	SNP	1	T	A	2	T/A	51.4/48.6	56/53	109	T	51.3761	56	A	48.6239	53	TCAACAACTCTGTATTTATG	TGTGGGAAAACTTCAGCGAA	TCAACAACTCTGTATTTATG	TGTGGGAAAACTTCAGCGAA
BY4743_10-8	BY4743	WT	a/α	2n	VII	745550	737246	SNP	1	A	T	2	A/T	52.9/47.1	72/64	136	A	52.9412	72	T	47.0588	64	TGTATAAGTGATGCCGTTGT	GGATTTTTACCATCTCGACT	TGTATAAGTGATGCCGTTGT	GGATTTTTACCATCTCGACT
BY4743_10-8	BY4743	WT	a/α	2n	VII	802236	793932	SNP	1	A	C	2	A/C	52.7/47.3	48/43	91	A	52.7473	48	C	47.2527	43	AGTAGAGTTTGATTCAAAGG	CCTTTTTTTTTGCCTCTTTG	AGTAGAGTTTGATTCAAAGG	CCTTTTTTTTTGCCTCTTTG
BY4743_10-8	BY4743	WT	a/α	2n	VII	920134	905152	SNP	1	G	T	2	T/G	51.7/48.3	60/56	116	T	51.7241	60	G	48.2759	56	TTTGAAAAAAAAAGTATTAT	CCGCTGAGCGCGCCACGTTA	TTTGAAAAAAAAAGTATTAT	CCGCTGAGCGCGCCACGTTA
BY4743_10-8	BY4743	WT	a/α	2n	VII	953519	938537	SNP	1	T	A	2	A/T	54.3/45.7	70/59	129	A	54.2636	70	T	45.7364	59	TTTTCTAGCAGCCGCTTGCT	TTATTTCGTGAGCTACTAAA	TTTTCTAGCAGCCGCTTGCT	TTATTTCGTGAGCTACTAAA
BY4743_10-8	BY4743	WT	a/α	2n	X	285772	272405	SNP	1	G	T	2	G/T	53.5/46.5	61/53	114	G	53.5088	61	T	46.4912	53	CCCAGACGTAACCGGCATAT	TAGCAGATGGTGCCTTGGCA	CCCAGACGTAACCGGCATAT	TAGCAGATGGTGCCTTGGCA
BY4743_10-8	BY4743	WT	a/α	2n	X	670611	652227	SNP	1	A	G	2	A/G	53.8/46.2	85/73	158	A	53.7975	85	G	46.2025	73	TTGGGCCCCACTACAATGTA	TACTTCAACATGTCATTTTC	TTGGGCCCCACTACAATGTA	TACTTCAACATGTCATTTTC
BY4743_10-8	BY4743	WT	a/α	2n	X	693861	675477	SNP	1	A	G	2	G/A	51.3/48.7	79/75	154	G	51.2987	79	A	48.7013	75	TCAGCAATTTGTTCTAACAG	GTATGCCACGACCTTATTCT	TCAGCAATTTGTTCTAACAG	GTATGCCACGACCTTATTCT
BY4743_10-8	BY4743	WT	a/α	2n	XI	8672	8673	SNP	1	A	T	1	T	58.6	68	116	T	58.6207	68				TGGTAAATTTTCCAGGACGG	AGTTAGCTTATGCAGTTTTG	TGGTAAATTTTCCAGGACGG	AGTTAGCTTATGCAGTTTTG
BY4743_10-8	BY4743	WT	a/α	2n	XI	343007	343011	SNP	1	A	G	2	A/G	52.3/47.7	58/53	111	A	52.2523	58	G	47.7477	53	TTGAGAAAAGCCACTAAAAG	CCGGCGGCCGTTGTCGTTAC	TTGAGAAAAGCCACTAAAAG	CCGGCGGCCGTTGTCGTTAC
BY4743_10-8	BY4743	WT	a/α	2n	XII	605383	561878	SNP	1	A	T	1	T	98.9	87	88	T	98.8636	87				TTTGGCACAGAAACTTCGGA	ACCGAATGTTGCTATAAGCA	TTTGGCACAGAAACTTCGGA	ACCGAATGTTGCTATAAGCA
BY4743_10-8	BY4743	WT	a/α	2n	XII	898752	852334	SNP	1	C	A	1	A	100	116	116	A	100	116				ACCGGTTTGATCAGAAAGTA	GGCTTAAACATCTGTCGTCA	ACCGGTTTGATCAGAAAGTA	GGCTTAAACATCTGTCGTCA
BY4743_10-8	BY4743	WT	a/α	2n	XIII	595764	581173	SNP	1	T	A	2	A/T	54.0/46.0	68/58	126	A	53.9683	68	T	46.0317	58	GGCAACAGACCTTTTATTTA	TTGGGAATTGTTATAGATCC	GGCAACAGACCTTTTATTTA	TTGGGAATTGTTATAGATCC
BY4743_10-8	BY4743	WT	a/α	2n	XV	264543	261391	SNP	1	A	G	2	A/G	51.3/48.7	59/56	115	A	51.3043	59	G	48.6957	56	GTTTGACGAAGGGAAATGCC	AAGTCGATGATAAAAAATTG	GTTTGACGAAGGGAAATGCC	AAGTCGATGATAAAAAATTG
BY4743_10-8	BY4743	WT	a/α	2n	XV	538511	535359	SNP	1	A	G	2	G/A	54.4/45.6	62/52	114	G	54.386	62	A	45.614	52	AGCACTTCACTATCATAAAG	CTATATGTACCTTGATCAAA	AGCACTTCACTATCATAAAG	CTATATGTACCTTGATCAAA
BY4743_10-8	BY4743	WT	a/α	2n	XV	709007	701409	SNP	1	A	G	1	G	55.4	41	74	G	55.4054	41				CAAAGGACTGTAAGGATGTC	GAATAATTAATTTCTAAAAT	CAAAGGACTGTAAGGATGTC	GAATAATTAATTTCTAAAAT
BY4743_10-8	BY4743	WT	a/α	2n	XV	754358	746577	SNP	1	A	G	2	G/A	51.7/48.3	61/57	118	G	51.6949	61	A	48.3051	57	TTCAAAAGTCTCATCAAATA	CTGCTTTGCAATAAAATTCG	TTCAAAAGTCTCATCAAATA	CTGCTTTGCAATAAAATTCG
BY4743_10-8	BY4743	WT	a/α	2n	XV	1012236	1003977	SNP	1	C	T	2	C/T	54.1/45.9	93/79	172	C	54.0698	93	T	45.9302	79	AGAATCCCAACTATCTTTCT	ACTCTCTCTCAAGTTCCCAT	AGAATCCCAACTATCTTTCT	ACTCTCTCTCAAGTTCCCAT
BY4743_10-8	BY4743	WT	a/α	2n	XVI	45367	37744	SNP	1	G	A	2	A/G	53.4/46.6	79/69	148	A	53.3784	79	G	46.6216	69	GATTTTCTTTTACTTGTGGC	GGGTGAATTTTTACTATTCG	GATTTTCTTTTACTTGTGGC	GGTGAATTTTTACTATTCGT
BY4743_10-8	BY4743	WT	a/α	2n	XVI	100512	88496	SNP	1	C	G	2	G/C	50.6/49.4	90/88	178	G	50.5618	90	C	49.4382	88	CGAGATGTCCTCCGATTTAG	TGCTGAGTTAGGATTCGACC	CGAGATGTCCTCCGATTTAG	TGCTGAGTTAGGATTCGACC
BY4743_10-8	BY4743	WT	a/α	2n	XVI	190104	178079	SNP	1	A	G	2	A/G	51.6/48.4	65/61	126	A	51.5873	65	G	48.4127	61	AAGGAACGACTGGTAGCAGA	CATCACATCCAGGATTACAA	AAGGAACGACTGGTAGCAGA	CATCACATCCAGGATTACAA
BY4743_10-8	BY4743	WT	a/α	2n	XVI	405517	393492	SNP	1	C	T	1	T	56.6	64	113	T	56.6372	64				AGAGACCTTACGAATCTTCT	GTTTGGACGCAGAATTGAAG	AGAGACCTTACGAATCTTCT	GTTTGGACGCAGAATTGAAG
BY4743_10-8	BY4743	WT	a/α	2n	XVI	838444	819250	SNP	1	T	C	2	C/T	50.0/49.3	74/73	148	C	50	74	T	49.3243	73	ACATCAAACCCACAAGGTTG	CTTTGTAGCCATATAGTTCA	ACATCAAACCCACAAGGTTG	CTTTGTAGCCATATAGTTCA
BY4743_10-8	BY4743	WT	a/α	2n	XVI	857806	834417	SNP	1	A	G	2	G/A	52.7/47.3	69/62	131	G	52.6718	69	A	47.3282	62	ATCTCTGTCTTCTTCTGTTC	TTATCAGCCACAGGGGAGTG	ATCTCTGTCTTCTTCTGTTC	TTATCAGCCACAGGGGAGTG
BY4743_10-8	BY4743	WT	a/α	2n	XI	646069	646071	DIP	1	A	-	2	-/A	52.7/45.9	77/67	146	-	52.7397	77	A	45.8904	67	TTTGGTATGTATCCGCCGTG	AAAAAGTAAGAAAACATCCA	TTTGGTATGTATCCGCCGTG	AAAAAGTAAGAAAACATCCA
BY4743_10-8	BY4743	WT	a/α	2n	XV	1058880	1050621	DIP	1	T	-	1	-	75.6	99	131	-	75.5725	99				GGTGTACTGTGATTTGCTCA	TTTTTTTTTTATAGAAAGAT	GGTGTACTGTGATTTGCTCA	TTTTTTTTTTATAGAAAGAT
BY4743_10-8	BY4743	WT	a/α	2n	Mito	67876	67880	DIP	1	-	A	1	A	74.8	943	1260	A	74.8413	943				ATATATATAAATATTTATAT	AAAAAAAAAATAAAAATATT	ATATATATAAATATTTATAT	AAAAAAAAAATAAAAATATT
BY4743_10-9	BY4743	WT	a/α	2n	I	498	498	SNP	1	C	T	2	C/T	52.0/48.0	117/108	225	C	52	117	T	48	108	TTCCACTTCACTCCATGGCC	ATCTCTCACTGAATCAGTAC	TTCCACTTCACTCCATGGCC	ATCTCTCACTGAATCAGTAC
BY4743_10-9	BY4743	WT	a/α	2n	II	85262	83664	SNP	1	G	A	2	G/A	51.6/48.4	130/122	252	G	51.5873	130	A	48.4127	122	TTTCAATTCCTAGGGACAAT	GCGCAACATCCAATAATAGT	TTTCAATTCCTAGGGACAAT	GCGCAACATCCAATAATAGT
BY4743_10-9	BY4743	WT	a/α	2n	II	607738	604467	SNP	1	T	A	2	T/A	50.9/49.1	85/82	167	T	50.8982	85	A	49.1018	82	GATGAAAAGGGCTCTAATTA	AAGGAAGCTACACAAATTCC	GATGAAAAGGGCTCTAATTA	AAGGAAGCTACACAAATTCC
BY4743_10-9	BY4743	WT	a/α	2n	II	625500	622229	SNP	1	C	A	2	C/A	54.4/45.6	111/93	204	C	54.4118	111	A	45.5882	93	TCATAATACATTGTATAAGC	TTCGCGTTTTTCACGGCCTC	TCATAATACATTGTATAAGC	TTCGCGTTTTTCACGGCCTC
BY4743_10-9	BY4743	WT	a/α	2n	II	627769	624498	SNP	1	A	G	2	G/A	54.0/46.0	101/86	187	G	54.0107	101	A	45.9893	86	GTGGTGCAAGCTTACATCAG	TTAAGACAAGACTCCAAGAG	GTGGTGCAAGCTTACATCAG	TTAAGACAAGACTCCAAGAG
BY4743_10-9	BY4743	WT	a/α	2n	II	636613	633342	SNP	1	A	T	2	A/T	50.7/49.3	116/113	229	A	50.655	116	T	49.345	113	ACAGTAAATACTATGTACAT	TATATTCGTCATTAAAAATA	ACAGTAAATACTATGTACAT	TATATTCGTCATTAAAAATA
BY4743_10-9	BY4743	WT	a/α	2n	II	637239	633968	SNP	1	C	T	2	T/C	51.0/49.0	98/94	192	T	51.0417	98	C	48.9583	94	CCACGGAACCTCAGAAGATG	GGCCAGACATAGTTTGTCCC	CCACGGAACCTCAGAAGATG	GGCCAGACATAGTTTGTCCC
BY4743_10-9	BY4743	WT	a/α	2n	II	654624	651353	SNP	1	C	T	2	C/T	52.7/47.3	108/97	205	C	52.6829	108	T	47.3171	97	TCTTTATCTTCTATCAAAGC	ACTGAGAAAGAAAAAGATAA	TCTTTATCTTCTATCAAAGC	ACTGAGAAAGAAAAAGATAA
BY4743_10-9	BY4743	WT	a/α	2n	II	663709	660438	SNP	1	C	A	2	C/A	54.7/45.3	122/101	223	C	54.7085	122	A	45.2915	101	TCTTCTCTTTTGAAGCCTTG	TCTAGTAGTTTCAGGTTTGT	TCTTCTCTTTTGAAGCCTTG	TCTAGTAGTTTCAGGTTTGT
BY4743_10-9	BY4743	WT	a/α	2n	II	675403	672132	SNP	1	G	C	2	C/G	50.0/50.0	108/108	216	C	50	108	G	50	108	AGAGGCAATCATTTTACGTT	GATCAACTCCTAACCCAGTA	AGAGGCAATCATTTTACGTT	GATCAACTCCTAACCCAGTA
BY4743_10-9	BY4743	WT	a/α	2n	III	3157	3157	SNP	1	T	C	1	C	99.6	228	229	C	99.5633	228				AGCAAGAATTAACGAAATTA	ACTCAATGAAGGATCTCGGT	AGCAAGAATTAACGAAATTA	ACTCAATGAAGGATCTCGGT
BY4743_10-9	BY4743	WT	a/α	2n	IV	507949	505711	SNP	1	A	G	2	G/A	54.5/45.5	67/56	123	G	54.4715	67	A	45.5285	56	AAACATTGCGAAGAAAAAGA	TAATAAAAGAAACTCAGAAA	AAACATTGCGAAGAAAAAGA	TAATAAAAGAAACTCAGAAA
BY4743_10-9	BY4743	WT	a/α	2n	IV	673403	660931	SNP	1	G	T	2	T/G	54.3/45.7	76/64	140	T	54.2857	76	G	45.7143	64	GTTTTGAGTATAAATTATAC	TACGAATCTTATAGATATAT	GTTTTGAGTATAAATTATAC	TACGAATCTTATAGATATAT
BY4743_10-9	BY4743	WT	a/α	2n	IV	710478	698007	SNP	1	A	G	2	G/A	52.7/47.3	69/62	131	G	52.6718	69	A	47.3282	62	GTAATTGACTTTCTTTGGAG	TCAAGACATACGTGCGATGG	GTAATTGACTTTCTTTGGAG	TCAAGACATACGTGCGATGG
BY4743_10-9	BY4743	WT	a/α	2n	IV	715159	702688	SNP	1	T	C	2	C/T	52.6/47.4	70/63	133	C	52.6316	70	T	47.3684	63	CTTCTAGAGCTTGCTGTTTT	CAACCCATCCTTTATCATCT	CTTCTAGAGCTTGCTGTTTT	CAACCCATCCTTTATCATCT
BY4743_10-9	BY4743	WT	a/α	2n	IV	1151620	1129771	SNP	1	C	G	1	G	55.3	89	161	G	55.2795	89				TCTGTTTGACCCGTATTTTT	TACGTTAAAATCGTGATTAC	TCTGTTTGACCCGTATTTTT	TACGTTAAAATCGTGATTAC
BY4743_10-9	BY4743	WT	a/α	2n	IV	1345677	1319798	SNP	1	T	C	2	C/T	53.8/46.2	99/85	184	C	53.8043	99	T	46.1957	85	AAACGTTGCCGGAAAAAGTT	ATTTATCCGAGAGAATAATT	AAACGTTGCCGGAAAAAGTT	ATTTATCCGAGAGAATAATT
BY4743_10-9	BY4743	WT	a/α	2n	V	50700	50695	SNP	1	T	C	2	C/T	51.6/48.1	133/124	258	C	51.5504	133	T	48.062	124	CTAGGGTTCCAATTCGTGTT	TTTTGTTTTTTCGTCTCTTT	CTAGGGTTCCAATTCGTGTT	TTTTGTTTTTTCGTCTCTTT
BY4743_10-9	BY4743	WT	a/α	2n	VI	81426	81055	SNP	1	A	T	2	T/A	50.9/49.1	145/140	285	T	50.8772	145	A	49.1228	140	TTTTGTGACATTCCAACTAA	ACACATGATGAAAACAGACA	TTTTGTGACATTCCAACTAA	ACACATGATGAAAACAGACA
BY4743_10-9	BY4743	WT	a/α	2n	VII	445139	445145	SNP	1	G	A	2	G/A	52.0/48.0	104/96	200	G	52	104	A	48	96	AACTGCTTATCAAAACGCGC	TTTATCTCATTTAGTGACCA	AACTGCTTATCAAAACGCGC	TTTATCTCATTTAGTGACCA
BY4743_10-9	BY4743	WT	a/α	2n	VII	541896	539357	SNP	1	C	T	2	T/C	53.5/46.5	83/72	155	T	53.5484	83	C	46.4516	72	TCACGCTTTCACCGTGGAGA	CGGGGTTCGACTCCCCGTAT	TCACGCTTTCACCGTGGAGA	CGGGGTTCGACTCCCCGTAT
BY4743_10-9	BY4743	WT	a/α	2n	VII	561491	558952	SNP	1	A	T	2	T/A	52.5/47.5	95/86	181	T	52.4862	95	A	47.5138	86	ATGAAAAAGAATGTGAACAA	AATTGAAAAAATTCCATATT	ATGAAAAAGAATGTGAACAA	AATTGAAAAAATTCCATATT
BY4743_10-9	BY4743	WT	a/α	2n	VII	691339	683212	SNP	1	A	C	2	C/A	51.2/48.8	88/84	172	C	51.1628	88	A	48.8372	84	TATGTTCCAGGTTATTACTC	AAGACGATGTACGGTACATT	TATGTTCCAGGTTATTACTC	AAGACGATGTACGGTACATT
BY4743_10-9	BY4743	WT	a/α	2n	VII	1006080	991937	SNP	1	C	A	2	A/C	50.0/50.0	132/132	264	A	50	132	C	50	132	TGGGCACGGAGGTAATATAT	TTCCTCAACCTACCAAGCTT	TGGGCACGGAGGTAATATAT	TTCCTCAACCTACCAAGCTT
BY4743_10-9	BY4743	WT	a/α	2n	VII	1015003	1000860	SNP	1	A	T	2	A/T	51.2/48.8	127/121	248	A	51.2097	127	T	48.7903	121	GAGAGATTCTTGAACCACTA	AATCATAGTATGGGGGATTT	GAGAGATTCTTGAACCACTA	AATCATAGTATGGGGGATTT
BY4743_10-9	BY4743	WT	a/α	2n	VII	1063127	1048984	SNP	1	T	A	2	A/T	50.8/49.2	126/122	248	A	50.8065	126	T	49.1935	122	TTGACTTCAACAGTGATGTC	GAGGTTAGGGTAGGTAAAGA	TTGACTTCAACAGTGATGTC	GAGGTTAGGGTAGGTAAAGA
BY4743_10-9	BY4743	WT	a/α	2n	VIII	504885	501406	SNP	1	A	T	2	T/A	50.5/49.0	101/98	200	T	50.5	101	A	49	98	TACCTAATTGGACCTTCTTG	CCTTACCCAATTTGTAAGAG	TACCTAATTGGACCTTCTTG	CCTTACCCAATTTGTAAGAG
BY4743_10-9	BY4743	WT	a/α	2n	VIII	505530	502051	SNP	1	T	A	2	T/A	53.2/46.8	143/126	269	T	53.1599	143	A	46.8401	126	AACATACGGTCCTCTAGCCA	CTTTCCTCAATAGTGGTGTA	AACATACGGTCCTCTAGCCA	CTTTCCTCAATAGTGGTGTA
BY4743_10-9	BY4743	WT	a/α	2n	VIII	557015	548279	SNP	1	A	T	2	A/T	51.4/48.6	89/84	173	A	51.4451	89	T	48.5549	84	GTCACTGTATTGCATGCTGG	TGGTGTTAGACAAGGCCGTA	GTCACTGTATTGCATGCTGG	TGGTGTTAGACAAGGCCGTA
BY4743_10-9	BY4743	WT	a/α	2n	IX	87360	72025	SNP	1	C	T	2	C/T	53.3/46.7	130/114	244	C	53.2787	130	T	46.7213	114	GAACCAGCAGTAAATAAATC	TGGCGATATACTGGCAACCT	GAACCAGCAGTAAATAAATC	TGGCGATATACTGGCAACCT
BY4743_10-9	BY4743	WT	a/α	2n	IX	436060	420727	SNP	1	T	C	2	C/T	50.8/49.2	92/89	181	C	50.8287	92	T	49.1713	89	AGGCGTCCTCCCATGCTATT	TTATATCATTGTTGATTGTT	AGGCGTCCTCCCATGCTATT	TTATATCATTGTTGATTGTT
BY4743_10-9	BY4743	WT	a/α	2n	X	317196	303863	SNP	1	T	A	2	A/T	52.5/47.5	85/77	162	A	52.4691	85	T	47.5309	77	TTAAGAATATGATGAAAAAC	CAGTTTGGGAAAAAAAAGGA	TTAAGAATATGATGAAAAAC	CAGTTTGGGAAAAAAAAGGA
BY4743_10-9	BY4743	WT	a/α	2n	X	666392	647778	SNP	1	T	C	2	T/C	50.6/49.4	118/115	233	T	50.6438	118	C	49.3562	115	ACTGATCATCATCCAGAGCC	CTCCACTGCCAACATTGAAT	ACTGATCATCATCCAGAGCC	CTCCACTGCCAACATTGAAT
BY4743_10-9	BY4743	WT	a/α	2n	XI	33476	33477	SNP	1	T	C	2	T/C	52.4/47.6	131/119	250	T	52.4	131	C	47.6	119	CTTCATATGTTCTTAGTACG	CACCTGTATGCATATCAACC	CTTCATATGTTCTTAGTACG	CACCTGTATGCATATCAACC
BY4743_10-9	BY4743	WT	a/α	2n	XII	319868	310912	SNP	1	T	C	1	C	55.9	90	161	C	55.9006	90				TTTCCTGAAAGCTTTTAACT	TGTACTACTGGCTGAGGTAG	TTTCCTGAAAGCTTTTAACT	TGTACTACTGGCTGAGGTAG
BY4743_10-9	BY4743	WT	a/α	2n	XII	629669	586397	SNP	1	T	C	2	C/T	52.5/47.5	83/75	158	C	52.5316	83	T	47.4684	75	TTTGATTATCGTTTAATGTG	CTTTCAATCTGGACAAATTT	TTTGATTATCGTTTAATGTG	CTTTCAATCTGGACAAATTT
BY4743_10-9	BY4743	WT	a/α	2n	XII	772264	727188	SNP	1	A	G	2	A/G	54.0/46.0	75/64	139	A	53.9568	75	G	46.0432	64	AGTTGCTAGAGGGCTATGAT	TCTCTAGTTTTGACAGCATT	AGTTGCTAGAGGGCTATGAT	TCTCTAGTTTTGACAGCATT
BY4743_10-9	BY4743	WT	a/α	2n	XII	917117	872044	SNP	1	T	A	2	A/T	53.2/46.8	109/96	205	A	53.1707	109	T	46.8293	96	TTCCTCGCACCTCTTTTTAC	AAATACGAAAACAACCATTG	TTCCTCGCACCTCTTTTTAC	AAATACGAAAACAACCATTG
BY4743_10-9	BY4743	WT	a/α	2n	XII	1012845	966154	SNP	1	A	G	2	G/A	52.7/47.3	125/112	237	G	52.7426	125	A	47.2574	112	ACCGGTGCAGAAGCCGTGGA	ACTGCTTTGAAGTTGGCCAG	ACCGGTGCAGAAGCCGTGGA	ACTGCTTTGAAGTTGGCCAG
BY4743_10-9	BY4743	WT	a/α	2n	XIII	562722	547266	SNP	1	G	C	2	C/G	50.5/49.5	95/93	188	C	50.5319	95	G	49.4681	93	AAAAGCTCAGAATATATCAA	TCCATATTCAAGAGAAGATA	AAAAGCTCAGAATATATCAA	TCCATATTCAAGAGAAGATA
BY4743_10-9	BY4743	WT	a/α	2n	XIV	121177	115570	SNP	1	T	A	2	T/A	52.0/48.0	64/59	123	T	52.0325	64	A	47.9675	59	TTGTAATTCCGGAACAATAG	CAAGACTTTCCCGGTCAATA	TTGTAATTCCGGAACAATAG	CAAGACTTTCCCGGTCAATA
BY4743_10-9	BY4743	WT	a/α	2n	XIV	783317	777055	SNP	1	T	C	1	C	95.5	105	110	C	95.4545	105				AAGTTGAAAGATAAATAATT	TTATGTTTAGGTGATTTTGG	AAGTTGAAAGATAAATAATT	TTATGTTTAGGTGATTTTGG
BY4743_10-9	BY4743	WT	a/α	2n	XV	85367	85367	SNP	1	A	G	2	A/G	54.8/45.2	92/76	168	A	54.7619	92	G	45.2381	76	ATAAACATAAATATAGGTAT	GATAAATTGTTCTTCTTTTT	ATAAACATAAATATAGGTAT	GATAAATTGTTCTTCTTTTT
BY4743_10-9	BY4743	WT	a/α	2n	XV	523612	520580	SNP	1	C	T	2	T/C	53.9/46.1	90/77	167	T	53.8922	90	C	46.1078	77	CCAAGGATGACCCTTCCCAG	AAGCTACTCGTTGGTCCTAT	CCAAGGATGACCCTTCCCAG	AAGCTACTCGTTGGTCCTAT
BY4743_10-9	BY4743	WT	a/α	2n	XV	925822	918574	SNP	1	C	A	2	A/C	50.7/49.3	104/101	205	A	50.7317	104	C	49.2683	101	TTCAACGACGGCAAGTACCA	CTGGAGTTACAATTGGAAGA	TTCAACGACGGCAAGTACCA	CTGGAGTTACAATTGGAAGA
BY4743_10-9	BY4743	WT	a/α	2n	XVI	85865	74061	SNP	1	C	A	2	C/A	54.8/45.2	131/108	239	C	54.8117	131	A	45.1883	108	ACTCCTTGTTCAATGAAATT	AGAAACTATCCCAGTTCTCA	ACTCCTTGTTCAATGAAATT	AGAAACTATCCCAGTTCTCA
BY4743_10-9	BY4743	WT	a/α	2n	XVI	371917	360112	SNP	1	G	T	2	G/T	54.3/45.7	89/75	164	G	54.2683	89	T	45.7317	75	AATCTGTTAAGGAGGTTCCA	GTGTTGAAATCATGACTTCT	AATCTGTTAAGGAGGTTCCA	GTGTTGAAATCATGACTTCT
BY4743_10-9	BY4743	WT	a/α	2n	XVI	375481	363676	SNP	1	C	A	2	C/A	51.1/48.9	94/90	184	C	51.087	94	A	48.913	90	TATGTATATATATCTATTTA	ATATTAGTTTACAGAACTTT	TATGTATATATATCTATTTA	ATATTAGTTTACAGAACTTT
BY4743_10-9	BY4743	WT	a/α	2n	XVI	405091	393286	SNP	1	T	C	1	C	55.6	85	153	C	55.5556	85				ATTTTTTTCTTTTCGTTTTG	TCAATAATGGACGGTTCTTC	ATTTTTTTCTTTTCGTTTTG	TCAATAATGGACGGTTCTTC
BY4743_10-9	BY4743	WT	a/α	2n	IV	1454709	1428830	DIP	1	T	-	2	-/T	52.7/45.2	126/108	239	-	52.7197	126	T	45.1883	108	TCTCAGAAATTTCATCGGTA	TTTGGCTTCGGTTAATATCT	TCTCAGAAATTTCATCGGTA	TTTGGCTTCGGTTAATATCT
BY4743_10-9	BY4743	WT	a/α	2n	Mito	20289	20289	DIP	1	-	G	1	G	84.8	1236	1458	G	84.7737	1236				CCCACCCCCATGCGAAGCAT	GGGGGGGGGTATAAGTATGG	CCCACCCCCATGCGAAGCAT	GGGGGGGGGTATAAGTATGG
mag1_10-1	BY4741	mag1Δ/mag1Δ	a/α	2n	I	6074	6074	SNP	1	C	T	2	T/C	54.3/45.7	70/59	129	T	54.2636	70	C	45.7364	59	CAACGAAGCGGGTTCATGGG	AAATTTTCTTTTTTTTCCCT	CAACGAAGCGGGTTCATGGG	AAATTTTCTTTTTTTTCCCT
mag1_10-1	BY4741	mag1Δ/mag1Δ	a/α	2n	I	16933	16933	SNP	1	T	A	2	T/A	54.4/45.6	62/52	114	T	54.386	62	A	45.614	52	AGTGGATGAAAACAAAAAAA	CACAGATTTTCATAAAAATA	AGTGGATGAAAACAAAAAAA	CACAGATTTTCATAAAAATA
mag1_10-1	BY4741	mag1Δ/mag1Δ	a/α	2n	I	28315	28179	SNP	1	T	C	2	T/C	52.6/47.4	70/63	133	T	52.6316	70	C	47.3684	63	AGTTTTTAAAAAATCTGTGG	CGTGTGTGATGTACCTTTCC	AGTTTTTAAAAAATCTGTGG	CGTGTGTGATGTACCTTTCC
mag1_10-1	BY4741	mag1Δ/mag1Δ	a/α	2n	I	181539	179491	SNP	1	T	A	2	A/T	51.8/48.2	72/67	139	A	51.7986	72	T	48.2014	67	CATTAGCTAACTCTCCTTTC	ATAAAGGGCGTCTTTCACTT	CATTAGCTAACTCTCCTTTC	ATAAAGGGCGTCTTTCACTT
mag1_10-1	BY4741	mag1Δ/mag1Δ	a/α	2n	I	220134	214609	SNP	1	T	C	2	C/T	51.7/48.3	30/28	58	C	51.7241	30	T	48.2759	28	AGTTCGAGCGACATTGCGCG	TTCCTTAGAAAACGCTGGAA	AGTTCGAGCGACATTGCGCG	TTCCTTAGAAAACGCTGGAA
mag1_10-1	BY4741	mag1Δ/mag1Δ	a/α	2n	I	224795	219270	SNP	1	T	C	2	C/T	51.8/48.2	72/67	139	C	51.7986	72	T	48.2014	67	TTAAGGTGAAACAATCAAGA	TATCTATGCCGATGAAAAAT	TTAAGGTGAAACAATCAAGA	TATCTATGCCGATGAAAAAT
mag1_10-1	BY4741	mag1Δ/mag1Δ	a/α	2n	II	565	565	SNP	1	T	G	1	G	66.2	49	74	G	66.2162	49				AATGCCGTCCAATGCGGCAC	TTAGATGGGGTAACTCCCAG	AATGCCGTCCAATGCGGCAC	GTAGATGGGGTAACTCCCAG
mag1_10-1	BY4741	mag1Δ/mag1Δ	a/α	2n	II	566	566	SNP	1	T	G	1	G	62.8	49	78	G	62.8205	49				ATGCCGTCCAATGCGGCACT	TAGATGGGGTAACTCCCAGC	ATGCCGTCCAATGCGGCACG	TAGATGGGGTAACTCCCAGC
mag1_10-1	BY4741	mag1Δ/mag1Δ	a/α	2n	II	2218	2218	SNP	1	A	T	2	A/T	53.8/45.2	50/42	93	A	53.7634	50	T	45.1613	42	GTCCTGACGTTGATGCTGGC	GTGGTAGTAGCATTAGTGCT	GTCCTGACGTTGATGCTGGC	GTGGTAGTAGCATTAGTGCT
mag1_10-1	BY4741	mag1Δ/mag1Δ	a/α	2n	II	15057	13389	SNP	1	T	G	2	G/T	53.7/46.3	79/68	147	G	53.7415	79	T	46.2585	68	AAGAATGGGTGTTTAGTTTT	GTGGCTAACAAAAATACTTT	AAGAATGGGTGTTTAGTTTT	GTGGCTAACAAAAATACTTT
mag1_10-1	BY4741	mag1Δ/mag1Δ	a/α	2n	II	41656	39735	SNP	1	A	G	2	A/G	54.5/45.5	78/65	143	A	54.5455	78	G	45.4545	65	CCGTTATTAGTGCACCTTCC	TGGAAGATGAGATTTTATCT	CCGTTATTAGTGCACCTTCC	TGGAAGATGAGATTTTATCT
mag1_10-1	BY4741	mag1Δ/mag1Δ	a/α	2n	II	63580	61659	SNP	1	A	G	2	G/A	52.7/47.3	59/53	112	G	52.6786	59	A	47.3214	53	TCGAAACCGCGTAGTCGGAA	CGACATTCCCCCGTACCAAA	TCGAAACCGCGTAGTCGGAA	CGACATTCCCCCGTACCAAA
mag1_10-1	BY4741	mag1Δ/mag1Δ	a/α	2n	II	64066	62145	SNP	1	A	G	2	A/G	50.0/50.0	76/76	152	A	50	76	G	50	76	CAATTTGAGAACCAAAGAGG	AGGTTTATACCCAGCGGTAT	CAATTTGAGAACCAAAGAGG	AGGTTTATACCCAGCGGTAT
mag1_10-1	BY4741	mag1Δ/mag1Δ	a/α	2n	II	119692	117766	SNP	1	T	C	2	T/C	50.3/49.7	73/72	145	T	50.3448	73	C	49.6552	72	AACTTGATATTCCAGTATCG	TTCTCCTAGCTGCATGATTT	AACTTGATATTCCAGTATCG	TTCTCCTAGCTGCATGATTT
mag1_10-1	BY4741	mag1Δ/mag1Δ	a/α	2n	II	192153	190227	SNP	1	C	A	2	A/C	52.0/48.0	66/61	127	A	51.9685	66	C	48.0315	61	CTGAAGTAAAATGTGATGTA	CTACAAGCAATGCATAAGCT	CTGAAGTAAAATGTGATGTA	CTACAAGCAATGCATAAGCT
mag1_10-1	BY4741	mag1Δ/mag1Δ	a/α	2n	II	213351	211425	SNP	1	T	C	2	T/C	50.8/49.2	63/61	124	T	50.8065	63	C	49.1935	61	TGATGTTTGTGGAATCATAG	GCCGCCTGTTCTTTGTACAG	TGATGTTTGTGGAATCATAG	GCCGCCTGTTCTTTGTACAG
mag1_10-1	BY4741	mag1Δ/mag1Δ	a/α	2n	II	215148	213222	SNP	1	C	T	2	C/T	54.3/45.7	70/59	129	C	54.2636	70	T	45.7364	59	AACAGGCTCAATAAACTGTG	AGGAACGAGACCGCTTTTCC	AACAGGCTCAATAAACTGTG	AGGAACGAGACCGCTTTTCC
mag1_10-1	BY4741	mag1Δ/mag1Δ	a/α	2n	II	217253	215327	SNP	1	A	T	1	T	56.4	79	140	T	56.4286	79				CGCTGCCCTTGTTTCCGCGG	GCTGCCTCCTCTGCCGCTCG	CGCTGCCCTTGTTTCCGCGG	GCTGCCTCCTCTGCCGCTCG
mag1_10-1	BY4741	mag1Δ/mag1Δ	a/α	2n	II	227813	225762	SNP	1	A	T	2	A/T	51.5/48.5	70/66	136	A	51.4706	70	T	48.5294	66	AGTGGAAAGAAATTAATTTA	GTGCCAAATTTACGGAGTTT	AGTGGAAAGAAATTAATTTA	GTGCCAAATTTACGGAGTTT
mag1_10-1	BY4741	mag1Δ/mag1Δ	a/α	2n	II	232034	229983	SNP	1	A	T	2	A/T	50.0/50.0	74/74	148	A	50	74	T	50	74	ATCGTCGTCAGAGAGCCATT	AAAGACTAGGTGAACATGCT	ATCGTCGTCAGAGAGCCATT	AAAGACTAGGTGAACATGCT
mag1_10-1	BY4741	mag1Δ/mag1Δ	a/α	2n	II	272972	269791	SNP	1	T	C	1	C	97	128	132	C	96.9697	128				ACTAGGTCGTTTTCGTCGTT	TGTGCCAACTGAAAAATAAT	ACTAGGTCGTTTTCGTCGTT	TGTGCCAACTGAAAAATAAT
mag1_10-1	BY4741	mag1Δ/mag1Δ	a/α	2n	II	405896	402714	SNP	1	C	A	1	A	100	137	137	A	100	137				TAGCTCGCGTGGCGTAATGG	AACGCGTCTGACTTCTAATC	TAGCTCGCGTGGCGTAATGG	AACGCGTCTGACTTCTAATC
mag1_10-1	BY4741	mag1Δ/mag1Δ	a/α	2n	II	425916	422734	SNP	1	A	T	1	T	99.2	126	127	T	99.2126	126				TTATGTACCAGAGGAAGCAA	GTACGAAAACTATCAGTTGA	TTATGTACCAGAGGAAGCAA	GTACGAAAACTATCAGTTGA
mag1_10-1	BY4741	mag1Δ/mag1Δ	a/α	2n	II	426119	422937	SNP	1	A	G	1	G	98.5	128	130	G	98.4615	128				ATAATAATAACACATAATGC	ACCTACTCAACTTCTTTCTG	ATAATAATAACACATAATGC	ACCTACTCAACTTCTTTCTG
mag1_10-1	BY4741	mag1Δ/mag1Δ	a/α	2n	II	539455	536273	SNP	1	A	G	1	G	100	105	105	G	100	105				CTCCTCATTTCGTTTACAAG	AAACAGCTTCAAGAGGCAAT	CTCCTCATTTCGTTTACAAG	AAACAGCTTCAAGAGGCAAT
mag1_10-1	BY4741	mag1Δ/mag1Δ	a/α	2n	II	548096	544914	SNP	1	A	G	1	G	100	117	117	G	100	117				CATTTCTGGGTAGCTCAGGC	CCGAAGTTAGCCCACCCCAA	CATTTCTGGGTAGCTCAGGC	CCGAAGTTAGCCCACCCCAA
mag1_10-1	BY4741	mag1Δ/mag1Δ	a/α	2n	II	609051	605869	SNP	1	G	A	1	A	98.5	133	135	A	98.5185	133				GTCACTAGTAACAATAAAAT	TTTTAAAATATCAGTAGCGT	GTCACTAGTAACAATAAAAT	TTTTAAAATATCAGTAGCGT
mag1_10-1	BY4741	mag1Δ/mag1Δ	a/α	2n	II	653258	650076	SNP	1	T	G	1	G	97.8	132	135	G	97.7778	132				AGCAAAATATGTCAGGCGAA	GTACACACAATGCAGAAACT	AGCAAAATATGTCAGGCGAA	GTACACACAATGCAGAAACT
mag1_10-1	BY4741	mag1Δ/mag1Δ	a/α	2n	II	667694	664512	SNP	1	T	A	1	A	100	139	139	A	100	139				CTTGTAAGTGTTAGCAATGT	CAACGTGCTTCTCACAATGT	CTTGTAAGTGTTAGCAATGT	CAACGTGCTTCTCACAATGT
mag1_10-1	BY4741	mag1Δ/mag1Δ	a/α	2n	II	674242	671060	SNP	1	T	C	1	C	98.1	157	160	C	98.125	157				ACTCTCCTGCCTTCTGTATT	TCTTCATATCTTCTATCCTT	ACTCTCCTGCCTTCTGTATT	TCTTCATATCTTCTATCCTT
mag1_10-1	BY4741	mag1Δ/mag1Δ	a/α	2n	II	679061	675879	SNP	1	T	C	2	T/C	50.4/49.6	63/62	125	T	50.4	63	C	49.6	62	CAATAGACTCGGCGTCCACT	TGTAATAGCAGTGATGAGAT	CAATAGACTCGGCGTCCACT	TGTAATAGCAGTGATGAGAT
mag1_10-1	BY4741	mag1Δ/mag1Δ	a/α	2n	II	693253	690071	SNP	1	A	G	2	G/A	51.3/48.7	77/73	150	G	51.3333	77	A	48.6667	73	ATTTAGGTTTTGAACCTCAA	TAACGCAAATCATGAAAACT	ATTTAGGTTTTGAACCTCAA	TAACGCAAATCATGAAAACT
mag1_10-1	BY4741	mag1Δ/mag1Δ	a/α	2n	II	718667	715485	SNP	1	T	C	2	C/T	54.7/45.3	87/72	159	C	54.717	87	T	45.283	72	TACCCTAGCATTCAGTTATG	CAGAAGTGTGTTTGGCATCT	TACCCTAGCATTCAGTTATG	CAGAAGTGTGTTTGGCATCT
mag1_10-1	BY4741	mag1Δ/mag1Δ	a/α	2n	II	748291	745103	SNP	1	G	A	1	A	97.9	142	145	A	97.931	142				TTCCCGAACATTGTTGTATT	GAAACAGCTTGACGAAGCAG	TTCCCGAACATTGTTGTATT	GAAACAGCTTGACGAAGCAG
mag1_10-1	BY4741	mag1Δ/mag1Δ	a/α	2n	II	790721	787533	SNP	1	T	C	1	C	100	155	155	C	100	155				TAAAGCGACACTATCGGCGG	TATTATTCATGCTGTTTCTG	TAAAGCGACACTATCGGCGG	TATTATTCATGCTGTTTCTG
mag1_10-1	BY4741	mag1Δ/mag1Δ	a/α	2n	III	22656	22165	SNP	1	T	C	2	C/T	51.5/48.5	84/79	163	C	51.5337	84	T	48.4663	79	ATAGACCTTCTTTTCGACGT	TCTGATCTTCTTGGGTTTCT	ATAGACCTTCTTTTCGACGT	TCTGATCTTCTTGGGTTTCT
mag1_10-1	BY4741	mag1Δ/mag1Δ	a/α	2n	III	53489	52998	SNP	1	A	G	2	A/G	53.4/46.6	71/62	133	A	53.3835	71	G	46.6165	62	ACAATCACAAGACATTTTTA	TATCATCGATCCGGATGATG	ACAATCACAAGACATTTTTA	TATCATCGATCCGGATGATG
mag1_10-1	BY4741	mag1Δ/mag1Δ	a/α	2n	III	152593	142447	SNP	1	T	G	1	G	98.7	76	77	G	98.7013	76				TGTTGCTCTGTGAATCTGAA	GTATGATAATGCTACGATTA	TGTTGCTCTGTGAATCTGAA	GTATGATAATGCTACGATTA
mag1_10-1	BY4741	mag1Δ/mag1Δ	a/α	2n	III	181020	170875	SNP	1	A	G	1	G	98.6	143	145	G	98.6207	143				ATCATGTATCACATCTGATG	ATCTTTTACGAAATATTGAT	ATCATGTATCACATCTGATG	ATCTTTTACGAAATATTGAT
mag1_10-1	BY4741	mag1Δ/mag1Δ	a/α	2n	III	231544	220751	SNP	1	A	T	2	T/A	55.0/45.0	83/68	151	T	54.9669	83	A	45.0331	68	AGCGACTTCACGACTACTTC	ATACCGAGCCTGTACCAATT	AGCGACTTCACGACTACTTC	ATACCGAGCCTGTACCAATT
mag1_10-1	BY4741	mag1Δ/mag1Δ	a/α	2n	III	246426	235633	SNP	1	T	C	2	T/C	50.3/49.7	76/75	151	T	50.3311	76	C	49.6689	75	TGGGGCCGTCGCTTATTGTT	CCGAGCCACCCAATGCTTTC	TGGGGCCGTCGCTTATTGTT	CCGAGCCACCCAATGCTTTC
mag1_10-1	BY4741	mag1Δ/mag1Δ	a/α	2n	III	248376	237583	SNP	1	T	C	2	T/C	49.6/48.9	66/65	133	T	49.6241	66	C	48.8722	65	ACGCCAGAGTTCTTGAGTTA	GCCAATCGTACCAGTAGTTG	ACGCCAGAGTTCTTGAGTTA	GCCAATCGTACCAGTAGTTG
mag1_10-1	BY4741	mag1Δ/mag1Δ	a/α	2n	III	280652	269859	SNP	1	A	G	2	A/G	51.3/48.7	80/76	156	A	51.2821	80	G	48.7179	76	TTTTCTTCAAACCACACCAG	AACACTAGAGTCCAATCTAC	TTTTCTTCAAACCACACCAG	AACACTAGAGTCCAATCTAC
mag1_10-1	BY4741	mag1Δ/mag1Δ	a/α	2n	III	305168	294375	SNP	1	T	C	2	T/C	50.6/49.4	84/82	166	T	50.6024	84	C	49.3976	82	ACAGTTGAAATAGCAGAATA	TCAGCAAAAGCACCATTGGA	ACAGTTGAAATAGCAGAATA	TCAGCAAAAGCACCATTGGA
mag1_10-1	BY4741	mag1Δ/mag1Δ	a/α	2n	III	305714	294921	SNP	1	T	C	2	T/C	54.2/45.8	77/65	142	T	54.2254	77	C	45.7746	65	TTACTCTCTGGGATTCGATG	GTTCTCATCATCTGAAGGGT	TTACTCTCTGGGATTCGATG	GTTCTCATCATCTGAAGGGT
mag1_10-1	BY4741	mag1Δ/mag1Δ	a/α	2n	IV	34943	33254	SNP	1	T	C	2	T/C	53.8/46.2	92/79	171	T	53.8012	92	C	46.1988	79	TGATAAGAATGTTTTGTAAA	GTATCAAATGTGGGTTCCTG	TGATAAGAATGTTTTGTAAA	GTATCAAATGTGGGTTCCTG
mag1_10-1	BY4741	mag1Δ/mag1Δ	a/α	2n	IV	51583	49894	SNP	1	T	C	2	T/C	50.9/49.1	84/81	165	T	50.9091	84	C	49.0909	81	GGCAAATGATCTGGTCTAGA	TGGTTCTTCTTGCCCAGCTC	GGCAAATGATCTGGTCTAGA	TGGTTCTTCTTGCCCAGCTC
mag1_10-1	BY4741	mag1Δ/mag1Δ	a/α	2n	IV	88122	86433	SNP	1	A	G	2	A/G	50.3/49.7	87/86	173	A	50.289	87	G	49.711	86	TGTTTGTGACTTTTCGGGTA	CCGGGCTTCGTTCTACTGTT	TGTTTGTGACTTTTCGGGTA	CCGGGCTTCGTTCTACTGTT
mag1_10-1	BY4741	mag1Δ/mag1Δ	a/α	2n	IV	113209	111520	SNP	1	A	G	1	G	98.8	160	162	G	98.7654	160				TTTACTTGACCGTTTATGAA	CGAAGGGTTTGACATTAGAA	TTTACTTGACCGTTTATGAA	CGAAGGGTTTGACATTAGAA
mag1_10-1	BY4741	mag1Δ/mag1Δ	a/α	2n	IV	122087	120398	SNP	1	A	G	1	G	100	162	162	G	100	162				CCGTGGTGACAGTATGTTGA	ACGTGCATCTTATAATGGGC	CCGTGGTGACAGTATGTTGA	ACGTGCATCTTATAATGGGC
mag1_10-1	BY4741	mag1Δ/mag1Δ	a/α	2n	IV	133231	131542	SNP	1	G	A	1	A	99.3	144	145	A	99.3103	144				CGCTTTAGGTTCTTGCTGAC	ATGATGCGTGAGTAATATTA	CGCTTTAGGTTCTTGCTGAC	ATGATGCGTGAGTAATATTA
mag1_10-1	BY4741	mag1Δ/mag1Δ	a/α	2n	IV	164061	162372	SNP	1	T	C	1	C	100	142	142	C	100	142				ATCTTTATATAACAAAGTAT	TCTTTATTTTCTAATAGTTC	ATCTTTATATAACAAAGTAT	TCTTTATTTTCTAATAGTTC
mag1_10-1	BY4741	mag1Δ/mag1Δ	a/α	2n	IV	165640	163951	SNP	1	C	A	1	A	57.8	85	147	A	57.8231	85				TTGGAATTCTCCCGGGACAA	TTTTGTAACCTTCGTCAAGT	TTGGAATTCTCCCGGGACAA	TTTTGTAACCTTCGTCAAGT
mag1_10-1	BY4741	mag1Δ/mag1Δ	a/α	2n	IV	171909	170220	SNP	1	A	G	2	A/G	50.0/50.0	74/74	148	A	50	74	G	50	74	ACTGTTATTATTAGTGTTGA	GTTATTATTGATGGAACCCA	ACTGTTATTATTAGTGTTGA	GTTATTATTGATGGAACCCA
mag1_10-1	BY4741	mag1Δ/mag1Δ	a/α	2n	IV	180766	179077	SNP	1	A	G	1	G	97.6	161	165	G	97.5758	161				ATCACATTCCTATTCAAAGT	AAGGAGGGGATCTCAAAGCA	ATCACATTCCTATTCAAAGT	AAGGAGGGGATCTCAAAGCA
mag1_10-1	BY4741	mag1Δ/mag1Δ	a/α	2n	IV	182057	180368	SNP	1	T	C	1	C	98.7	152	154	C	98.7013	152				TTTCGTTAAAGGCCTCAATG	TTGCGGTTTCTTCACTTTCA	TTTCGTTAAAGGCCTCAATG	TTGCGGTTTCTTCACTTTCA
mag1_10-1	BY4741	mag1Δ/mag1Δ	a/α	2n	IV	192401	190712	SNP	1	T	G	1	G	62.4	78	125	G	62.4	78				AATGGAAAATGGCCACGTAT	GCTCTCATTCTCTTCACTTG	AATGGAAAATGGCCACGTAT	GCTCTCATTCTCTTCACTTG
mag1_10-1	BY4741	mag1Δ/mag1Δ	a/α	2n	IV	207253	205564	SNP	1	T	A	2	T/A	53.6/46.4	75/65	140	T	53.5714	75	A	46.4286	65	TTTTTGGCCACATTCAAAAT	TCCTTTAAACGGGGGACACC	TTTTTGGCCACATTCAAAAT	TCCTTTAAACGGGGGACACC
mag1_10-1	BY4741	mag1Δ/mag1Δ	a/α	2n	IV	207446	205757	SNP	1	T	C	1	C	55.6	74	133	C	55.6391	74				ATACCCAATCGAATGCCTGT	TTGTTAGTCTGTACTCTTGT	ATACCCAATCGAATGCCTGT	TTGTTAGTCTGTACTCTTGT
mag1_10-1	BY4741	mag1Δ/mag1Δ	a/α	2n	IV	207761	206072	SNP	1	T	A	2	A/T	51.8/48.2	73/68	141	A	51.773	73	T	48.227	68	TACGATCTTTCACTAATTGT	TGTATTCTTCATCCAGGAGA	TACGATCTTTCACTAATTGT	TGTATTCTTCATCCAGGAGA
mag1_10-1	BY4741	mag1Δ/mag1Δ	a/α	2n	IV	243189	241500	SNP	1	A	T	2	T/A	53.3/46.7	81/71	152	T	53.2895	81	A	46.7105	71	ACTTTCTGCCTTAAATGCGA	GTATTATCGGGATAAACCCT	ACTTTCTGCCTTAAATGCGA	GTATTATCGGGATAAACCCT
mag1_10-1	BY4741	mag1Δ/mag1Δ	a/α	2n	IV	249682	247993	SNP	1	A	G	2	G/A	51.7/48.3	62/58	120	G	51.6667	62	A	48.3333	58	TACCAGATATTCAGAATTTA	ACTTGTCTGCAACACCCGAT	TACCAGATATTCAGAATTTA	ACTTGTCTGCAACACCCGAT
mag1_10-1	BY4741	mag1Δ/mag1Δ	a/α	2n	IV	309596	307907	SNP	1	G	A	2	G/A	54.6/45.4	77/64	141	G	54.6099	77	A	45.3901	64	GCAGTTTTCTTGATATGATG	AACATTATTGTATTAGTAGT	GCAGTTTTCTTGATATGATG	AACATTATTGTATTAGTAGT
mag1_10-1	BY4741	mag1Δ/mag1Δ	a/α	2n	IV	336909	335220	SNP	1	T	C	2	T/C	53.1/46.9	77/68	145	T	53.1034	77	C	46.8966	68	CCTTTATCAGTGCTGTTACT	TTCAAACTACTACATCCTTG	CCTTTATCAGTGCTGTTACT	TTCAAACTACTACATCCTTG
mag1_10-1	BY4741	mag1Δ/mag1Δ	a/α	2n	IV	488664	486978	SNP	1	C	A	1	A	99.2	121	122	A	99.1803	121				CAGTAACTGTAACATTCATT	CTGTTCGCAGATTTCAGCAA	CAGTAACTGTAACATTCATT	CTGTTCGCAGATTTCAGCAA
mag1_10-1	BY4741	mag1Δ/mag1Δ	a/α	2n	IV	664163	652178	SNP	1	T	C	1	C	99.3	150	151	C	99.3377	150				ACTTCTGGCTGAAGAGGGGC	CGGTATTCTATCAAAATGCG	ACTTCTGGCTGAAGAGGGGC	CGGTATTCTATCAAAATGCG
mag1_10-1	BY4741	mag1Δ/mag1Δ	a/α	2n	IV	770269	758286	SNP	1	C	G	1	G	98.2	112	114	G	98.2456	112				ACCATATTTATTTGTTCATT	ACTTTCGAGTATAAAATTAA	ACCATATTTATTTGTTCATT	ACTTTCGAGTATAAAATTAA
mag1_10-1	BY4741	mag1Δ/mag1Δ	a/α	2n	IV	776727	764744	SNP	1	A	G	1	G	100	107	107	G	100	107				GTATTCCTAGAAAACTGAAA	GAAGAAGCCATTATAATCCC	GTATTCCTAGAAAACTGAAA	GAAGAAGCCATTATAATCCC
mag1_10-1	BY4741	mag1Δ/mag1Δ	a/α	2n	IV	811304	799321	SNP	1	T	C	1	C	100	152	152	C	100	152				AAACGAGGTATTGCTTGGAC	TCTCAGACTTTACAGGTATT	AAACGAGGTATTGCTTGGAC	TCTCAGACTTTACAGGTATT
mag1_10-1	BY4741	mag1Δ/mag1Δ	a/α	2n	IV	812654	800671	SNP	1	A	G	1	G	98.3	116	118	G	98.3051	116				ATCCAAATACTTAGAAGCAA	GAAAAACGGTACCCTACCAC	ATCCAAATACTTAGAAGCAA	GAAAAACGGTACCCTACCAC
mag1_10-1	BY4741	mag1Δ/mag1Δ	a/α	2n	IV	918011	904868	SNP	1	A	G	1	G	99.2	128	129	G	99.2248	128				TTTTCCCGGCATGCGCAGCA	CAAACTTCTACCTTCAATTC	TTTTCCCGGCATGCGCAGCA	CAAACTTCTACCTTCAATTC
mag1_10-1	BY4741	mag1Δ/mag1Δ	a/α	2n	IV	987080	973914	SNP	1	T	A	1	A	100	113	113	A	100	113				ACATACCTAATATTATAGCC	TAATCACAATGGAATCCCAA	ACATACCTAATATTATAGCC	TAATCACAATGGAATCCCAA
mag1_10-1	BY4741	mag1Δ/mag1Δ	a/α	2n	IV	1058977	1042434	SNP	1	G	T	2	T/G	54.0/46.0	68/58	126	T	53.9683	68	G	46.0317	58	GTACACAAAGTTAACAATTG	CGTTTGAAATTGTTCCTAGA	GTACACAAAGTTAACAATTG	CGTTTGAAATTGTTCCTAGA
mag1_10-1	BY4741	mag1Δ/mag1Δ	a/α	2n	IV	1062647	1046104	SNP	1	G	T	2	G/T	50.7/49.3	71/69	140	G	50.7143	71	T	49.2857	69	GGACACGATGATAACTTTGT	TCCCATTCTTCTCAATTTGA	GGACACGATGATAACTTTGT	TCCCATTCTTCTCAATTTGA
mag1_10-1	BY4741	mag1Δ/mag1Δ	a/α	2n	IV	1072514	1055971	SNP	1	A	G	1	G	100	123	123	G	100	123				CAAAAATGGCTGTTGTGAAG	GACAAGCAAATAAGGTAATA	CAAAAATGGCTGTTGTGAAG	GACAAGCAAATAAGGTAATA
mag1_10-1	BY4741	mag1Δ/mag1Δ	a/α	2n	IV	1105880	1084536	SNP	1	T	C	2	C/T	49.5/49.5	52/52	105	C	49.5238	52	T	49.5238	52	TTAATACAATGCCCTATTTC	ATTGTGTTTTAACATTGTGA	TTAATACAATGCCCTATTTC	ATTGTGTTTTAACATTGTGA
mag1_10-1	BY4741	mag1Δ/mag1Δ	a/α	2n	IV	1106511	1085167	SNP	1	T	C	1	C	98	145	148	C	97.973	145				TTTTGTTGCAGGCGAGGTTG	CGTTGTCTTCTTCTTAACGG	TTTTGTTGCAGGCGAGGTTG	CGTTGTCTTCTTCTTAACGG
mag1_10-1	BY4741	mag1Δ/mag1Δ	a/α	2n	IV	1112606	1091262	SNP	1	G	C	1	C	99.2	119	120	C	99.1667	119				TTCTTATAGTCCTGAATTGT	GACTCAATAAGGTAGCTTTG	TTCTTATAGTCCTGAATTGT	GACTCAATAAGGTAGCTTTG
mag1_10-1	BY4741	mag1Δ/mag1Δ	a/α	2n	IV	1149517	1128173	SNP	1	T	C	1	C	98.6	144	146	C	98.6301	144				TAAGGTATGCTATATGTGTA	TTTCCAATGTTTAGTTTTTA	TAAGGTATGCTATATGTGTA	TTTCCAATGTTTAGTTTTTA
mag1_10-1	BY4741	mag1Δ/mag1Δ	a/α	2n	IV	1177042	1154859	SNP	1	A	T	1	T	99.3	147	148	T	99.3243	147				ACACCAATTTCGGGTCACGA	AGGCTTGAAAAGATGCAATT	ACACCAATTTCGGGTCACGA	AGGCTTGAAAAGATGCAATT
mag1_10-1	BY4741	mag1Δ/mag1Δ	a/α	2n	IV	1226366	1201263	SNP	1	A	T	1	T	99.2	129	130	T	99.2308	129				CCTGTACCAAGGATCATAAG	CCACCGCCGGCGGCAAAATA	CCTGTACCAAGGATCATAAG	CCACCGCCGGCGGCAAAATA
mag1_10-1	BY4741	mag1Δ/mag1Δ	a/α	2n	IV	1238451	1213348	SNP	1	T	A	1	A	98.3	115	117	A	98.2906	115				CAATGTTGTCTCCTCCATCT	TAGGTATGGGGAACCCTGGT	CAATGTTGTCTCCTCCATCT	TAGGTATGGGGAACCCTGGT
mag1_10-1	BY4741	mag1Δ/mag1Δ	a/α	2n	IV	1282767	1257664	SNP	1	A	T	1	T	99.2	132	133	T	99.2481	132				TTACCAGGCAGGTCAAAAGA	CCAACTGCAGAAGAACATAA	TTACCAGGCAGGTCAAAAGA	CCAACTGCAGAAGAACATAA
mag1_10-1	BY4741	mag1Δ/mag1Δ	a/α	2n	IV	1357693	1332589	SNP	1	T	C	1	C	97.5	119	122	C	97.541	119				ATACTCATTTTTCAATGACT	CACCGATGCGCTATCCAATT	ATACTCATTTTTCAATGACT	CACCGATGCGCTATCCAATT
mag1_10-1	BY4741	mag1Δ/mag1Δ	a/α	2n	IV	1446639	1421535	SNP	1	T	C	1	C	100	126	126	C	100	126				CGACCAACTGAGCATATATG	CCTCGTTCATTTGTTTATCA	CGACCAACTGAGCATATATG	CCTCGTTCATTTGTTTATCA
mag1_10-1	BY4741	mag1Δ/mag1Δ	a/α	2n	IV	1451549	1426445	SNP	1	C	T	1	T	99.3	148	149	T	99.3289	148				TTCACCAGTGAAAGATATCA	TTCACGTTTAAATGAGACCA	TTCACCAGTGAAAGATATCA	TTCACGTTTAAATGAGACCA
mag1_10-1	BY4741	mag1Δ/mag1Δ	a/α	2n	IV	1517696	1492591	SNP	1	T	A	1	A	97.9	95	97	A	97.9381	95				GATAGTTTTTTTTTTTTCAA	TGTTATTATTTAATTCGTTT	GATAGTTTTTTTTTTTTCAA	TGTTATTATTTAATTCGTTT
mag1_10-1	BY4741	mag1Δ/mag1Δ	a/α	2n	V	179044	177947	SNP	1	A	G	2	A/G	51.8/48.2	133/124	257	A	51.751	133	G	48.249	124	AAGCAGGAAGAAGAAAAGGT	CGAAATAAAGTTAAAAGTTC	AAGCAGGAAGAAGAAAAGGT	CGAAATAAAGTTAAAAGTTC
mag1_10-1	BY4741	mag1Δ/mag1Δ	a/α	2n	V	298121	297023	SNP	1	A	G	2	A/G	51.9/48.1	122/113	235	A	51.9149	122	G	48.0851	113	GTCTAAAAATAGTGCTTCTC	TGTATTGATTTTGAGTAGCC	GTCTAAAAATAGTGCTTCTC	TGTATTGATTTTGAGTAGCC
mag1_10-1	BY4741	mag1Δ/mag1Δ	a/α	2n	V	383961	382863	SNP	1	T	C	2	C/T	50.6/49.4	137/134	271	C	50.5535	137	T	49.4465	134	GTGGAGTGTTCCCTATATTA	CTTGGTAGTTCAAACATATC	GTGGAGTGTTCCCTATATTA	CTTGGTAGTTCAAACATATC
mag1_10-1	BY4741	mag1Δ/mag1Δ	a/α	2n	VI	12563	11921	SNP	1	T	C	1	C	60.7	82	135	C	60.7407	82				CGATGAGTCGGCTTAATTTT	TAGGGGGACGAGATTGGCGC	CGATGAGTCGGCTTAATTTT	TAGGGGGACGAGATTGGCGC
mag1_10-1	BY4741	mag1Δ/mag1Δ	a/α	2n	VI	23752	23110	SNP	1	T	A	2	T/A	51.4/48.6	74/70	144	T	51.3889	74	A	48.6111	70	ACCTTGATCATTGTAAAAAA	TACACCGGTGATATTATACA	ACCTTGATCATTGTAAAAAA	TACACCGGTGATATTATACA
mag1_10-1	BY4741	mag1Δ/mag1Δ	a/α	2n	VI	54821	54179	SNP	1	T	C	2	C/T	51.0/49.0	73/70	143	C	51.049	73	T	48.951	70	TTTTCTTTTTCTTCTTGGTT	GAGTAGAAAGGGGAAGGAAG	TTTTCTTTTTCTTCTTGGTT	GAGTAGAAAGGGGAAGGAAG
mag1_10-1	BY4741	mag1Δ/mag1Δ	a/α	2n	VI	85501	84859	SNP	1	T	C	1	C	57	86	151	C	56.9536	86				TGTTCTCCAAAGAGCAATAT	TGAGAAGGTGTAGTATTGAC	TGTTCTCCAAAGAGCAATAT	TGAGAAGGTGTAGTATTGAC
mag1_10-1	BY4741	mag1Δ/mag1Δ	a/α	2n	VI	158089	152855	SNP	1	T	C	1	C	98.7	149	151	C	98.6755	149				ACCTTTAAATGTGACTTTTC	CATAAGGAAATCTAGCGATT	ACCTTTAAATGTGACTTTTC	AATAAGGAAATCTAGCGATT
mag1_10-1	BY4741	mag1Δ/mag1Δ	a/α	2n	VI	158090	152856	SNP	1	C	A	1	A	98.7	147	149	A	98.6577	147				CCTTTAAATGTGACTTTTCT	ATAAGGAAATCTAGCGATTC	CCTTTAAATGTGACTTTTCC	ATAAGGAAATCTAGCGATTC
mag1_10-1	BY4741	mag1Δ/mag1Δ	a/α	2n	VI	176129	170895	SNP	1	A	G	2	A/G	50.7/49.3	73/71	144	A	50.6944	73	G	49.3056	71	AGTTACCGTAGACAAAGTTC	CACCCTTTTCCCGCATGGAC	AGTTACCGTAGACAAAGTTC	CACCCTTTTCCCGCATGGAC
mag1_10-1	BY4741	mag1Δ/mag1Δ	a/α	2n	VI	192592	187358	SNP	1	G	T	2	G/T	53.6/46.4	90/78	168	G	53.5714	90	T	46.4286	78	ACGACTAGACTAGGAGTTAT	CAGTATGAGCTGCAGCTCCG	ACGACTAGACTAGGAGTTAT	CAGTATGAGCTGCAGCTCCG
mag1_10-1	BY4741	mag1Δ/mag1Δ	a/α	2n	VI	234121	228887	SNP	1	A	G	2	G/A	50.7/49.3	72/70	142	G	50.7042	72	A	49.2958	70	GATTTTATTTCAACACGATT	AGACACAAGCGTTACTTCCC	GATTTTATTTCAACACGATT	AGACACAAGCGTTACTTCCC
mag1_10-1	BY4741	mag1Δ/mag1Δ	a/α	2n	VI	269779	264545	SNP	1	T	C	2	T/C	52.7/47.3	79/71	150	T	52.6667	79	C	47.3333	71	GAATAGTTCTTTTTTACGTT	AGCTGAGTTTAACGGTGATT	GAATAGTTCTTTTTTACGTT	AGCTGAGTTTAACGGTGATT
mag1_10-1	BY4741	mag1Δ/mag1Δ	a/α	2n	VII	16149	16154	SNP	1	A	G	2	G/A	51.1/48.9	95/91	186	G	51.0753	95	A	48.9247	91	TGCACGTTTTAAACAGAACC	TGAACATTCCAAGAAACTTG	TGCACGTTTTAAACAGAACC	TGAACATTCCAAGAAACTTG
mag1_10-1	BY4741	mag1Δ/mag1Δ	a/α	2n	VII	27174	27179	SNP	1	G	C	1	C	56.1	101	180	C	56.1111	101				CATCTCGCGTGGCTTCTGTT	CAATTACTCTGACACTAGTT	CATCTCGCGTGGCTTCTGTT	CAATTACTCTGACACTAGTT
mag1_10-1	BY4741	mag1Δ/mag1Δ	a/α	2n	VII	28234	28239	SNP	1	A	T	1	T	98.2	166	169	T	98.2249	166				TGTTGATATTTTTTGCAAGC	GTGGCTGGCGTATTTGATCA	TGTTGATATTTTTTGCAAGC	GTGGCTGGCGTATTTGATCA
mag1_10-1	BY4741	mag1Δ/mag1Δ	a/α	2n	VII	41247	41252	SNP	1	A	G	1	G	99	190	192	G	98.9583	190				AATGGTTTGCTTTCTGAACC	GTCCTGTGTTCGCTGCCTTG	AATGGTTTGCTTTCTGAACC	GTCCTGTGTTCGCTGCCTTG
mag1_10-1	BY4741	mag1Δ/mag1Δ	a/α	2n	VII	314994	314999	SNP	1	A	G	2	G/A	50.8/49.2	65/63	128	G	50.7812	65	A	49.2188	63	TGACTAATGAGCAGCGTGGA	ATCTTAATGCGAAGCAAAGA	TGACTAATGAGCAGCGTGGA	ATCTTAATGCGAAGCAAAGA
mag1_10-1	BY4741	mag1Δ/mag1Δ	a/α	2n	VII	354062	354067	SNP	1	A	T	2	T/A	50.4/49.6	61/60	121	T	50.4132	61	A	49.5868	60	GTCAAAACCTTGAATTTTTT	GACGATTTACCTACCAAAAA	GTCAAAACCTTGAATTTTTT	GACGATTTACCTACCAAAAA
mag1_10-1	BY4741	mag1Δ/mag1Δ	a/α	2n	VII	357192	357197	SNP	1	A	G	2	G/A	51.4/48.6	55/52	107	G	51.4019	55	A	48.5981	52	CTTCTCCTAAATTTGTCCAA	CAAAACGGCTCAAGAAGCCC	CTTCTCCTAAATTTGTCCAA	CAAAACGGCTCAAGAAGCCC
mag1_10-1	BY4741	mag1Δ/mag1Δ	a/α	2n	VII	361492	361497	SNP	1	G	T	2	T/G	51.1/48.9	67/64	131	T	51.145	67	G	48.855	64	AAATTTCTGCTTGAATGGAA	AGTCTAAAGAAAGATAATCA	AAATTTCTGCTTGAATGGAA	AGTCTAAAGAAAGATAATCA
mag1_10-1	BY4741	mag1Δ/mag1Δ	a/α	2n	VII	364555	364560	SNP	1	T	C	2	T/C	52.2/47.8	72/66	138	T	52.1739	72	C	47.8261	66	AGATACCATACTTACCCAAG	TGGCTTCGATGATAGCATTG	AGATACCATACTTACCCAAG	TGGCTTCGATGATAGCATTG
mag1_10-1	BY4741	mag1Δ/mag1Δ	a/α	2n	VII	427627	427633	SNP	1	T	C	2	T/C	52.8/47.2	75/67	142	T	52.8169	75	C	47.1831	67	GTGACCACTTGGTCCATTAT	TGGTCAACCAATTGACTACC	GTGACCACTTGGTCCATTAT	TGGTCAACCAATTGACTACC
mag1_10-1	BY4741	mag1Δ/mag1Δ	a/α	2n	VII	465287	465293	SNP	1	T	C	2	T/C	50.4/49.6	66/65	131	T	50.3817	66	C	49.6183	65	TTTTCCATTTTCTAAAATGG	GAATCCTTTCTCTGGAAATG	TTTTCCATTTTCTAAAATGG	GAATCCTTTCTCTGGAAATG
mag1_10-1	BY4741	mag1Δ/mag1Δ	a/α	2n	VII	480152	480158	SNP	1	A	G	2	A/G	51.0/49.0	73/70	143	A	51.049	73	G	48.951	70	CCACCAACCGAATAAGGTAA	CATGGTAGCGATGATGTCGA	CCACCAACCGAATAAGGTAA	CATGGTAGCGATGATGTCGA
mag1_10-1	BY4741	mag1Δ/mag1Δ	a/α	2n	VII	481695	481701	SNP	1	T	C	1	C	58.9	86	146	C	58.9041	86				ATAGTAATACCTAGAGTGTA	CTCAAGATTCTAACAATACC	ATAGTAATACCTAGAGTGTA	CTCAAGATTCTAACAATACC
mag1_10-1	BY4741	mag1Δ/mag1Δ	a/α	2n	VII	557179	554892	SNP	1	A	G	2	A/G	51.7/48.3	62/58	120	A	51.6667	62	G	48.3333	58	GGATTTTTCTCGTCCCTGAG	CTTACTCCTTTTCAAGTCAT	GGATTTTTCTCGTCCCTGAG	CTTACTCCTTTTCAAGTCAT
mag1_10-1	BY4741	mag1Δ/mag1Δ	a/α	2n	VII	557504	555217	SNP	1	T	C	2	T/C	51.1/48.9	69/66	135	T	51.1111	69	C	48.8889	66	TTATATGTTTGTTACAAGTT	TTATGTATAGATATATGTTA	TTATATGTTTGTTACAAGTT	TTATGTATAGATATATGTTA
mag1_10-1	BY4741	mag1Δ/mag1Δ	a/α	2n	VII	562156	559869	SNP	1	T	A	1	A	58.7	37	63	A	58.7302	37				AAATACTAGTTAGTAGATGA	AGTTGATTTCTATTCCAACA	AAATACTAGTTAGTAGATGA	AGTTGATTTCTATTCCAACA
mag1_10-1	BY4741	mag1Δ/mag1Δ	a/α	2n	VII	582748	574898	SNP	1	T	G	2	G/T	51.5/48.5	68/64	132	G	51.5152	68	T	48.4848	64	AAAAAAGAAATATTTATTAT	GAAATAACTGTCCAAAGAAG	AAAAAAGAAATATTTATTAT	GAAATAACTGTCCAAAGAAG
mag1_10-1	BY4741	mag1Δ/mag1Δ	a/α	2n	VII	642487	634637	SNP	1	A	G	2	G/A	51.1/48.9	68/65	133	G	51.1278	68	A	48.8722	65	AACAGGCACTTTTAAGGAAA	ACACATCCGTCAAGTTGGTT	AACAGGCACTTTTAAGGAAA	ACACATCCGTCAAGTTGGTT
mag1_10-1	BY4741	mag1Δ/mag1Δ	a/α	2n	VII	719811	711961	SNP	1	A	G	2	A/G	53.5/46.5	69/60	129	A	53.4884	69	G	46.5116	60	TGGTCAATGGGCCCGTTACG	AGAACAGAAATTCAATGTTC	TGGTCAATGGGCCCGTTACG	AGAACAGAAATTCAATGTTC
mag1_10-1	BY4741	mag1Δ/mag1Δ	a/α	2n	VII	734826	726976	SNP	1	C	A	2	C/A	53.8/46.2	85/73	158	C	53.7975	85	A	46.2025	73	TGTCGTTTAAAAGGAAAATA	ATGGGTCTACTTTAAAAAAC	TGTCGTTTAAAAGGAAAATA	ATGGGTCTACTTTAAAAAAC
mag1_10-1	BY4741	mag1Δ/mag1Δ	a/α	2n	VII	750945	743095	SNP	1	A	G	2	G/A	52.2/47.8	72/66	138	G	52.1739	72	A	47.8261	66	TACGAAGCAAGAAAAAGACA	ATGCAAAATGCAAAAACACT	TACGAAGCAAGAAAAAGACA	ATGCAAAATGCAAAAACACT
mag1_10-1	BY4741	mag1Δ/mag1Δ	a/α	2n	VII	769415	761565	SNP	1	A	G	1	G	57.3	75	131	G	57.2519	75				TTGTGAATGAAGATGGGCCT	ACACATCAAGGCGGACAAAG	TTGTGAATGAAGATGGGCCT	ACACATCAAGGCGGACAAAG
mag1_10-1	BY4741	mag1Δ/mag1Δ	a/α	2n	VII	774410	766560	SNP	1	C	T	2	T/C	52.5/47.5	63/57	120	T	52.5	63	C	47.5	57	AGAGGTCTCCGGTTCGATTC	GGACTCGTCCAAATTTTTTT	AGAGGTCTCCGGTTCGATTC	GGACTCGTCCAAATTTTTTT
mag1_10-1	BY4741	mag1Δ/mag1Δ	a/α	2n	VII	774756	766906	SNP	1	A	T	2	A/T	54.6/45.4	53/44	97	A	54.6392	53	T	45.3608	44	TAGACGTTTCGGCACTGTAT	TTCTTGTCCCTTTTTTTTTG	TAGACGTTTCGGCACTGTAT	TTCTTGTCCCTTTTTTTTTG
mag1_10-1	BY4741	mag1Δ/mag1Δ	a/α	2n	VII	780485	772635	SNP	1	C	T	2	T/C	53.5/46.5	83/72	155	T	53.5484	83	C	46.4516	72	ACTCACTGCTTATCTGACAT	GTTAAGAAAGAAGATTGGTC	ACTCACTGCTTATCTGACAT	GTTAAGAAAGAAGATTGGTC
mag1_10-1	BY4741	mag1Δ/mag1Δ	a/α	2n	VII	782244	774394	SNP	1	A	G	1	G	56.6	86	152	G	56.5789	86				TATATGTTGGTGCGAGCGGT	ATGAGTTATACAGGTTGAAC	TATATGTTGGTGCGAGCGGT	ATGAGTTATACAGGTTGAAC
mag1_10-1	BY4741	mag1Δ/mag1Δ	a/α	2n	VII	879770	865221	SNP	1	T	C	1	C	55.9	85	152	C	55.9211	85				GGAAGAACACTAGTTCCGTT	TGTATTCAACCTGGAAATTT	GGAAGAACACTAGTTCCGTT	TGTATTCAACCTGGAAATTT
mag1_10-1	BY4741	mag1Δ/mag1Δ	a/α	2n	VII	888268	873719	SNP	1	T	C	2	T/C	52.9/47.1	74/66	140	T	52.8571	74	C	47.1429	66	ATGATAGAAATTAATAGTAG	CTATGCTGGATGATATATAT	ATGATAGAAATTAATAGTAG	CTATGCTGGATGATATATAT
mag1_10-1	BY4741	mag1Δ/mag1Δ	a/α	2n	VII	955775	941226	SNP	1	T	C	2	C/T	54.4/45.6	81/68	149	C	54.3624	81	T	45.6376	68	GCAATTATCCTTGTGCCAAA	GAAGGAAATATCTCGAAATC	GCAATTATCCTTGTGCCAAA	GAAGGAAATATCTCGAAATC
mag1_10-1	BY4741	mag1Δ/mag1Δ	a/α	2n	VII	1015637	1001088	SNP	1	T	C	2	C/T	51.2/48.8	84/80	164	C	51.2195	84	T	48.7805	80	GGTGTAGGGTAAAAATAGTG	CTGGTCTAAGATCGATAAGA	GGTGTAGGGTAAAAATAGTG	CTGGTCTAAGATCGATAAGA
mag1_10-1	BY4741	mag1Δ/mag1Δ	a/α	2n	VII	1056708	1042159	SNP	1	A	G	1	G	100	157	157	G	100	157				AAATTAGCCATCATTCCACA	GATCCAGTATTATTTAGGGG	AAATTAGCCATCATTCCACA	GATCCAGTATTATTTAGGGG
mag1_10-1	BY4741	mag1Δ/mag1Δ	a/α	2n	VII	1070906	1056357	SNP	1	T	C	2	T/C	51.9/48.1	84/78	162	T	51.8519	84	C	48.1481	78	CAGACTCTGTTGTGAAGCGG	CGGTCTGATTACGGTAGCAG	CAGACTCTGTTGTGAAGCGG	CGGTCTGATTACGGTAGCAG
mag1_10-1	BY4741	mag1Δ/mag1Δ	a/α	2n	VII	1073285	1058736	SNP	1	A	C	2	A/C	54.1/45.9	92/78	170	A	54.1176	92	C	45.8824	78	AATTAGAACACCTTCACCAC	TACTGCTAACACGAAATTTA	AATTAGAACACCTTCACCAC	TACTGCTAACACGAAATTTA
mag1_10-1	BY4741	mag1Δ/mag1Δ	a/α	2n	VII	1082394	1067845	SNP	1	T	C	1	C	99.2	118	119	C	99.1597	118				GGATCCGAACTTGGTGTGTT	TTAGTAATCTCTTTGCAAAA	GGATCCGAACTTGGTGTGTT	TTAGTAATCTCTTTGCAAAA
mag1_10-1	BY4741	mag1Δ/mag1Δ	a/α	2n	VIII	1321	1323	SNP	1	T	C	2	T/C	53.2/46.0	67/58	126	T	53.1746	67	C	46.0317	58	CAAGCCATCCTCCGATACGA	ACTTTCTGGCCAGCCCAACA	CAAGCCATCCTCCGATACGA	ACTTTCTGGCCAGCCCAACA
mag1_10-1	BY4741	mag1Δ/mag1Δ	a/α	2n	VIII	29199	29203	SNP	1	T	C	2	C/T	50.0/50.0	72/72	144	C	50	72	T	50	72	GCACGAATTGTGCAAACGCC	ACCAAGGTCTCTGAGAAATG	GCACGAATTGTGCAAACGCC	ACCAAGGTCTCTGAGAAATG
mag1_10-1	BY4741	mag1Δ/mag1Δ	a/α	2n	VIII	34393	34397	SNP	1	T	C	2	C/T	50.8/49.2	65/63	128	C	50.7812	65	T	49.2188	63	AAAAATAGTGTACTATCATA	TTTCACTACCATAATTGGCT	AAAAATAGTGTACTATCATA	TTTCACTACCATAATTGGCT
mag1_10-1	BY4741	mag1Δ/mag1Δ	a/α	2n	VIII	75218	75222	SNP	1	T	C	2	T/C	51.5/48.5	84/79	163	T	51.5337	84	C	48.4663	79	CACAACTATTTTTATGAAGA	AAAGTTCGGGTAACGATAAT	CACAACTATTTTTATGAAGA	AAAGTTCGGGTAACGATAAT
mag1_10-1	BY4741	mag1Δ/mag1Δ	a/α	2n	VIII	105705	103613	SNP	1	A	G	2	G/A	51.4/48.0	91/85	177	G	51.4124	91	A	48.0226	85	GAATTATTAGTCATGTGATT	CCATCCTACTTATTATACTA	GAATTATTAGTCATGTGATT	CCATCCTACTTATTATACTA
mag1_10-1	BY4741	mag1Δ/mag1Δ	a/α	2n	VIII	125926	123834	SNP	1	T	A	2	T/A	52.3/47.7	56/51	107	T	52.3364	56	A	47.6636	51	TCTATGTCGTGCTTTTTTCA	TCATACGTAATCTTATGCAT	TCTATGTCGTGCTTTTTTCA	TCATACGTAATCTTATGCAT
mag1_10-1	BY4741	mag1Δ/mag1Δ	a/α	2n	VIII	182896	180804	SNP	1	A	T	2	T/A	54.5/45.5	61/51	112	T	54.4643	61	A	45.5357	51	AAGTGGCGTTGTTGAAGGGA	GTACAGAGATTACCCCCGTA	AAGTGGCGTTGTTGAAGGGA	GTACAGAGATTACCCCCGTA
mag1_10-1	BY4741	mag1Δ/mag1Δ	a/α	2n	VIII	185227	183135	SNP	1	C	T	1	T	55.3	73	132	T	55.303	73				TGCATTCCTTGATATCCGCA	CAAACACAGAACCACCTAGA	TGCATTCCTTGATATCCGCA	CAAACACAGAACCACCTAGA
mag1_10-1	BY4741	mag1Δ/mag1Δ	a/α	2n	VIII	217938	214555	SNP	1	T	C	2	T/C	51.3/48.7	61/58	119	T	51.2605	61	C	48.7395	58	AAACAACAACTCTCTTCTTG	TCTTCCTCTCTTTGCATCAT	AAACAACAACTCTCTTCTTG	TCTTCCTCTCTTTGCATCAT
mag1_10-1	BY4741	mag1Δ/mag1Δ	a/α	2n	VIII	276439	273056	SNP	1	A	G	1	G	95.3	122	128	G	95.3125	122				TAACGTTAGAAAATAACAAA	AAAAAAAAAGAAAAAGATAA	TAACGTTAGAAAATAACAAA	AAAAAAAAAGAAAAAGATAA
mag1_10-1	BY4741	mag1Δ/mag1Δ	a/α	2n	VIII	343647	340264	SNP	1	A	T	1	T	55.7	68	122	T	55.7377	68				GATTATAAAAATGCCAAGGA	GATTTCCAAAAGGCCCAAAG	GATTATAAAAATGCCAAGGA	GATTTCCAAAAGGCCCAAAG
mag1_10-1	BY4741	mag1Δ/mag1Δ	a/α	2n	VIII	344859	341476	SNP	1	T	A	2	T/A	50.9/49.1	54/52	106	T	50.9434	54	A	49.0566	52	TCCTCAGGGCTTTTGCCGTC	TCAATTCTGATTGCGGTTTT	TCCTCAGGGCTTTTGCCGTC	TCAATTCTGATTGCGGTTTT
mag1_10-1	BY4741	mag1Δ/mag1Δ	a/α	2n	VIII	370036	366653	SNP	1	T	C	2	C/T	50.4/49.6	66/65	131	C	50.3817	66	T	49.6183	65	AATACGTACCAAAGAAGTGT	ATAAAAGTGATATAACTATG	AATACGTACCAAAGAAGTGT	ATAAAAGTGATATAACTATG
mag1_10-1	BY4741	mag1Δ/mag1Δ	a/α	2n	VIII	384775	381392	SNP	1	T	C	1	C	98.5	130	132	C	98.4848	130				CTTAATCTGTTTCCAATGTT	TAAAGTCGCTCATATGTTCA	CTTAATCTGTTTCCAATGTT	TAAAGTCGCTCATATGTTCA
mag1_10-1	BY4741	mag1Δ/mag1Δ	a/α	2n	VIII	472951	469568	SNP	1	T	C	1	C	98.6	146	148	C	98.6486	146				CGCAAACAGGCATGACAGCT	TCAACAATAATGATAATGGT	CGCAAACAGGCATGACAGCT	TCAACAATAATGATAATGGT
mag1_10-1	BY4741	mag1Δ/mag1Δ	a/α	2n	VIII	495564	492179	SNP	1	A	T	2	A/T	50.0/50.0	80/80	160	A	50	80	T	50	80	ATAGTATCACGCAATCTTTA	GATTAAAGGAAAGATTTGGT	ATAGTATCACGCAATCTTTA	GATTAAAGGAAAGATTTGGT
mag1_10-1	BY4741	mag1Δ/mag1Δ	a/α	2n	VIII	506055	502670	SNP	1	A	G	2	G/A	52.7/47.3	79/71	150	G	52.6667	79	A	47.3333	71	GTTTAAAGAGAATAACCATA	AACAGGCTGAAAAGCAAGCA	GTTTAAAGAGAATAACCATA	AACAGGCTGAAAAGCAAGCA
mag1_10-1	BY4741	mag1Δ/mag1Δ	a/α	2n	VIII	532007	528622	SNP	1	T	C	1	C	54.5	18	33	C	54.5455	18				AACTGTAGTTTAAAATATTT	CTGGCTCTACTCGGTGCGAT	AACTGTAGTTTAAAATATTT	CTGGCTCTACTCGGTGCGAT
mag1_10-1	BY4741	mag1Δ/mag1Δ	a/α	2n	VIII	541109	534911	SNP	1	T	C	2	C/T	50.0/50.0	61/61	122	C	50	61	T	50	61	CAAAGTTATAGAACATTGCT	GAATAAGCACCTCACAGAGT	CAAAGTTATAGAACATTGCT	GAATAAGCACCTCACAGAGT
mag1_10-1	BY4741	mag1Δ/mag1Δ	a/α	2n	VIII	551072	542765	SNP	1	A	T	1	T	55.9	19	34	T	55.8824	19				TGCCCAAGTGACATTTAGCT	AACTCGGGTATTGTCTACAA	TGCCCAAGTGACATTTAGCT	AACTCGGGTATTGTCTACAA
mag1_10-1	BY4741	mag1Δ/mag1Δ	a/α	2n	IX	33036	18064	SNP	1	T	C	1	C	68.7	147	214	C	68.6916	147				TACGTTGTAATATGATGCAT	TCGGCACAATTATCCGAGAA	TACGTTGTAATATGATGCAT	TCGGCACAATTATCCGAGAA
mag1_10-1	BY4741	mag1Δ/mag1Δ	a/α	2n	IX	91157	76187	SNP	1	T	C	1	C	62.7	136	217	C	62.6728	136				AGTACATTTTTAGTATCCAT	TTACCATCTGGCAGAACCCC	AGTACATTTTTAGTATCCAT	TTACCATCTGGCAGAACCCC
mag1_10-1	BY4741	mag1Δ/mag1Δ	a/α	2n	IX	117147	102180	SNP	1	T	C	1	C	70.7	147	208	C	70.6731	147				ATATCTTCCTTGAATTGTTT	CTTTTGAACCTTCTTCTTTT	ATATCTTCCTTGAATTGTTT	CTTTTGAACCTTCTTCTTTT
mag1_10-1	BY4741	mag1Δ/mag1Δ	a/α	2n	IX	127214	112247	SNP	1	T	C	1	C	100	130	130	C	100	130				TGCTAATGTTCAACTGCTCT	TAAGTATTGTTTACGTCTCG	TGCTAATGTTCAACTGCTCT	TAAGTATTGTTTACGTCTCG
mag1_10-1	BY4741	mag1Δ/mag1Δ	a/α	2n	IX	286577	271609	SNP	1	A	G	1	G	68.8	132	192	G	68.75	132				AATTATAATGGTCTGAGCCA	ACTAGGAATGTATCAAACAA	AATTATAATGGTCTGAGCCA	ACTAGGAATGTATCAAACAA
mag1_10-1	BY4741	mag1Δ/mag1Δ	a/α	2n	IX	337327	322359	SNP	1	T	A	1	A	64.9	150	231	A	64.9351	150				CCTCTGCAAAAAATCTATCG	TTATTTTATTTCTTTGTCTT	CCTCTGCAAAAAATCTATCG	TTATTTTATTTCTTTGTCTT
mag1_10-1	BY4741	mag1Δ/mag1Δ	a/α	2n	X	53925	40428	SNP	1	T	C	2	T/C	54.4/45.6	93/78	171	T	54.386	93	C	45.614	78	AAAATACAATTTGCAGCCAT	CCATGGGATAAATTTACTCA	AAAATACAATTTGCAGCCAT	CCATGGGATAAATTTACTCA
mag1_10-1	BY4741	mag1Δ/mag1Δ	a/α	2n	X	54564	41067	SNP	1	A	G	2	A/G	50.6/49.4	79/77	156	A	50.641	79	G	49.359	77	GTAATGAAATTGCCACAGGC	CCATATTCACTGGTGATTTT	GTAATGAAATTGCCACAGGC	CCATATTCACTGGTGATTTT
mag1_10-1	BY4741	mag1Δ/mag1Δ	a/α	2n	X	59129	45632	SNP	1	T	C	2	C/T	52.0/48.0	66/61	127	C	51.9685	66	T	48.0315	61	TCGGATTTGAACCGATGATC	CCACATTACTAGTGTGGCGC	TCGGATTTGAACCGATGATC	CCACATTACTAGTGTGGCGC
mag1_10-1	BY4741	mag1Δ/mag1Δ	a/α	2n	X	120989	107492	SNP	1	A	G	2	A/G	53.6/46.4	67/58	125	A	53.6	67	G	46.4	58	AAGTTCAAGCTACCACCACT	CTTTAGCCCCAAAGAGCACC	AAGTTCAAGCTACCACCACT	CTTTAGCCCCAAAGAGCACC
mag1_10-1	BY4741	mag1Δ/mag1Δ	a/α	2n	X	234027	220530	SNP	1	A	G	2	A/G	51.2/48.8	65/62	127	A	51.1811	65	G	48.8189	62	GGAAGAATATTCTTTTTGTC	CTAACACAACCATTCTATAA	GGAAGAATATTCTTTTTGTC	CTAACACAACCATTCTATAA
mag1_10-1	BY4741	mag1Δ/mag1Δ	a/α	2n	X	272046	258549	SNP	1	T	C	1	C	100	133	133	C	100	133				TCTCACCTGCTTCTGCATGG	TCCTGTCTACGTCTGCTCTG	TCTCACCTGCTTCTGCATGG	TCCTGTCTACGTCTGCTCTG
mag1_10-1	BY4741	mag1Δ/mag1Δ	a/α	2n	X	410415	396918	SNP	1	T	C	2	T/C	51.2/48.8	64/61	125	T	51.2	64	C	48.8	61	GAATATTGTTCTCCCCCAGT	CTCTCAGGAGATGGTTTAAC	GAATATTGTTCTCCCCCAGT	CTCTCAGGAGATGGTTTAAC
mag1_10-1	BY4741	mag1Δ/mag1Δ	a/α	2n	X	415647	402150	SNP	1	G	A	2	G/A	51.3/48.7	78/74	152	G	51.3158	78	A	48.6842	74	CCCTCGGCATAAACTACTCT	TCGTAAGATCATTAACATGT	CCCTCGGCATAAACTACTCT	TCGTAAGATCATTAACATGT
mag1_10-1	BY4741	mag1Δ/mag1Δ	a/α	2n	X	488736	469957	SNP	1	A	G	2	G/A	54.2/45.8	90/76	166	G	54.2169	90	A	45.7831	76	CATGATTATCGAATAACTTA	CACAAACACAGAGTCTGCAT	CATGATTATCGAATAACTTA	CACAAACACAGAGTCTGCAT
mag1_10-1	BY4741	mag1Δ/mag1Δ	a/α	2n	X	499045	480266	SNP	1	A	G	2	A/G	50.3/49.7	86/85	171	A	50.2924	86	G	49.7076	85	GCGTGACTTGATTTCACCGT	CCTGTTACGTCGTGTGAAAG	GCGTGACTTGATTTCACCGT	CCTGTTACGTCGTGTGAAAG
mag1_10-1	BY4741	mag1Δ/mag1Δ	a/α	2n	X	501206	482427	SNP	1	T	C	2	T/C	50.8/49.2	65/63	128	T	50.7812	65	C	49.2188	63	CCAGATAAAATTCTACCCAT	TCATGACAAACTCATGCTTG	CCAGATAAAATTCTACCCAT	TCATGACAAACTCATGCTTG
mag1_10-1	BY4741	mag1Δ/mag1Δ	a/α	2n	X	527006	508227	SNP	1	C	G	2	G/C	50.8/49.2	62/60	122	G	50.8197	62	C	49.1803	60	GTTGTTGTTTTCCTTAGTAG	GTCTGCTTCCAGAGAGTATT	GTTGTTGTTTTCCTTAGTAG	GTCTGCTTCCAGAGAGTATT
mag1_10-1	BY4741	mag1Δ/mag1Δ	a/α	2n	X	712142	693364	SNP	1	A	G	1	G	98.5	135	137	G	98.5401	135				AAGTGTATAGGAGTATGTTC	CAAACCGTAGTATTATGTGC	AAGTGTATAGGAGTATGTTC	CAAACCGTAGTATTATGTGC
mag1_10-1	BY4741	mag1Δ/mag1Δ	a/α	2n	XI	76149	76153	SNP	1	A	G	1	G	60	141	235	G	60	141				CAAAAGCGATGAAAATGGAG	TGACAACGACAGCAAAAACG	CAAAAGCGATGAAAATGGAG	TGACAACGACAGCAAAAACG
mag1_10-1	BY4741	mag1Δ/mag1Δ	a/α	2n	XI	156402	156406	SNP	1	A	G	1	G	62.4	146	234	G	62.3932	146				GAAAAAACTTTTGGCATCCA	TATCCTCTACCTAAAATGGA	GAAAAAACTTTTGGCATCCA	TATCCTCTACCTAAAATGGA
mag1_10-1	BY4741	mag1Δ/mag1Δ	a/α	2n	XI	222985	222989	SNP	1	T	C	1	C	98.9	178	180	C	98.8889	178				CTCAAAATATACTTGTCTAA	TGTGTAAAAAAGAAAAAAAA	CTCAAAATATACTTGTCTAA	TGTGTAAAAAAGAAAAAAAA
mag1_10-1	BY4741	mag1Δ/mag1Δ	a/α	2n	XI	403507	403511	SNP	1	A	T	1	T	66.2	151	228	T	66.2281	151				TGTGGCACCACAAAATAAAT	ATCTGAACTGAATATATGTA	TGTGGCACCACAAAATAAAT	ATCTGAACTGAATATATGTA
mag1_10-1	BY4741	mag1Δ/mag1Δ	a/α	2n	XI	496870	496870	SNP	1	A	G	1	G	67.4	122	181	G	67.4033	122				CCGAATCAGAGTTTACCGAT	AAATATCTGAACATAGGGAT	CCGAATCAGAGTTTACCGAT	AAATATCTGAACATAGGGAT
mag1_10-1	BY4741	mag1Δ/mag1Δ	a/α	2n	XI	547600	547600	SNP	1	T	C	1	C	67.4	147	218	C	67.4312	147				TTATTTGTGTTGCAATCGGT	CTGCATCCACAATAACACTT	TTATTTGTGTTGCAATCGGT	CTGCATCCACAATAACACTT
mag1_10-1	BY4741	mag1Δ/mag1Δ	a/α	2n	XII	38958	32233	SNP	1	C	A	2	C/A	52.2/47.8	140/128	268	C	52.2388	140	A	47.7612	128	GAAGTAGTAAGTTAAATATG	ACCATAAACACTGCTGATAT	GAAGTAGTAAGTTAAATATG	ACCATAAACACTGCTGATAT
mag1_10-1	BY4741	mag1Δ/mag1Δ	a/α	2n	XII	76933	70207	SNP	1	A	C	1	C	59.2	171	289	C	59.1696	171				GCCTTTGTGGAAAAAAAACA	TCTACAAGCGAAAAGAAAAA	GCCTTTGTGGAAAAAAAACA	TCTACAAGCGAAAAGAAAAA
mag1_10-1	BY4741	mag1Δ/mag1Δ	a/α	2n	XII	228406	219072	SNP	1	T	C	2	T/C	50.4/49.6	118/116	234	T	50.4274	118	C	49.5726	116	ATTGAAGAATATTGCAATCA	CTATTTTAGTACCCTCACCT	ATTGAAGAATATTGCAATCA	CTATTTTAGTACCCTCACCT
mag1_10-1	BY4741	mag1Δ/mag1Δ	a/α	2n	XII	245037	235703	SNP	1	T	C	2	T/C	54.2/45.8	123/104	227	T	54.185	123	C	45.815	104	AGTATCTTTATCTATTGTTG	GTCCAGAATTGTTGTCCAAT	AGTATCTTTATCTATTGTTG	GTCCAGAATTGTTGTCCAAT
mag1_10-1	BY4741	mag1Δ/mag1Δ	a/α	2n	XII	534615	493452	SNP	1	A	G	1	G	75.2	170	226	G	75.2212	170				ATGACCTATTTTATTTCTAG	TAAACCCTGGTGTAAGCAGG	ATGACCTATTTTATTTCTAG	TAAACCCTGGTGTAAGCAGG
mag1_10-1	BY4741	mag1Δ/mag1Δ	a/α	2n	XII	547514	506351	SNP	1	C	G	1	G	79.2	168	212	G	79.2453	168				GGAAAAGAAAGAGAAAAAAT	GAAGAAGGAAAAGAAAGAAA	GGAAAAGAAAGAGAAAAAAT	GAAGAAGGAAAAGAAAGAAA
mag1_10-1	BY4741	mag1Δ/mag1Δ	a/α	2n	XII	586647	545484	SNP	1	C	T	1	T	100	254	254	T	100	254				ATATATGGGCCGTTGTCAAA	ATTCATTATGTTTATATGTC	ATATATGGGCCGTTGTCAAA	ATTCATTATGTTTATATGTC
mag1_10-1	BY4741	mag1Δ/mag1Δ	a/α	2n	XII	588590	547427	SNP	1	T	A	1	A	99.6	231	232	A	99.569	231				TGTCTTCTTCAGAGTTTTCC	CACTGCTGGCTTTAAATATT	TGTCTTCTTCAGAGTTTTCC	CACTGCTGGCTTTAAATATT
mag1_10-1	BY4741	mag1Δ/mag1Δ	a/α	2n	XII	600323	557056	SNP	1	T	C	1	C	100	226	226	C	100	226				TAAAATCTAATTGATTTTTT	CGCGATGCAGTTTGTCCAAA	TAAAATCTAATTGATTTTTT	CGCGATGCAGTTTGTCCAAA
mag1_10-1	BY4741	mag1Δ/mag1Δ	a/α	2n	XII	730772	685972	SNP	1	T	C	1	C	66.9	160	239	C	66.9456	160				ACTGGAGCTTTAAGGTGTTA	CTAAGGAAGGATAAAAGAAC	ACTGGAGCTTTAAGGTGTTA	CTAAGGAAGGATAAAAGAAC
mag1_10-1	BY4741	mag1Δ/mag1Δ	a/α	2n	XII	797162	750689	SNP	1	T	A	1	A	63.6	157	247	A	63.5628	157				GTATGAAATAAAATGCGATA	CCTCCGTAGTTGTCGTCCGA	GTATGAAATAAAATGCGATA	CCTCCGTAGTTGTCGTCCGA
mag1_10-1	BY4741	mag1Δ/mag1Δ	a/α	2n	XII	844547	798074	SNP	1	T	C	1	C	100	221	221	C	100	221				ACATGATGTTATGGCACATG	TCATACATTTGGTGAAACTT	ACATGATGTTATGGCACATG	TCATACATTTGGTGAAACTT
mag1_10-1	BY4741	mag1Δ/mag1Δ	a/α	2n	XII	894493	848022	SNP	1	A	G	1	G	99.3	288	290	G	99.3103	288				AAAATTACAAACTGAAATTA	AATGAAGAGACTGGAAAGAC	AAAATTACAAACTGAAATTA	AATGAAGAGACTGGAAAGAC
mag1_10-1	BY4741	mag1Δ/mag1Δ	a/α	2n	XII	899162	852691	SNP	1	A	T	1	T	97.8	136	139	T	97.8417	136				TATTTACCACATTTTTTCTG	ATTTTTTTTTAAGAGGGTGA	TATTTACCACATTTTTTCTG	TTTTTTTTTAAGAGGGTGAA
mag1_10-1	BY4741	mag1Δ/mag1Δ	a/α	2n	XII	903557	857086	SNP	1	T	C	1	C	99.6	274	275	C	99.6364	274				ATGCATTAGGACCCATTATT	CTTTTTTACAATTTTTCCGT	ATGCATTAGGACCCATTATT	CTTTTTTACAATTTTTCCGT
mag1_10-1	BY4741	mag1Δ/mag1Δ	a/α	2n	XII	931874	885403	SNP	1	T	C	1	C	100	247	247	C	100	247				TAATAGAGTAAACATGTACA	GAAGCACTACCATCAGAAAG	TAATAGAGTAAACATGTACA	GAAGCACTACCATCAGAAAG
mag1_10-1	BY4741	mag1Δ/mag1Δ	a/α	2n	XII	932565	886094	SNP	1	T	C	1	C	99.5	211	212	C	99.5283	211				TGATCTTGGTAGATTTCTTC	TTACCCTCACCTTCCCCACA	TGATCTTGGTAGATTTCTTC	TTACCCTCACCTTCCCCACA
mag1_10-1	BY4741	mag1Δ/mag1Δ	a/α	2n	XII	995151	944935	SNP	1	A	T	1	T	99.6	279	280	T	99.6429	279				GTTTAAGCTTTATTCAGGTA	ACCAATTAGCGAAATTCCAA	GTTTAAGCTTTATTCAGGTA	ACCAATTAGCGAAATTCCAA
mag1_10-1	BY4741	mag1Δ/mag1Δ	a/α	2n	XII	1020052	969840	SNP	1	T	C	1	C	99.6	283	284	C	99.6479	283				AGATTTGAGTCGCGTGATGA	CATTTGTTGCAATTCATTCT	AGATTTGAGTCGCGTGATGA	CATTTGTTGCAATTCATTCT
mag1_10-1	BY4741	mag1Δ/mag1Δ	a/α	2n	XIII	10678	7539	SNP	1	A	G	2	G/A	53.1/46.9	86/76	162	G	53.0864	86	A	46.9136	76	CTTATGCTCAATTGCAAGAA	GAGAAGAGGACTATGGAAAA	CTTATGCTCAATTGCAAGAA	GAGAAGAGGACTATGGAAAA
mag1_10-1	BY4741	mag1Δ/mag1Δ	a/α	2n	XIII	42395	39256	SNP	1	T	C	1	C	56.6	81	143	C	56.6434	81				CAGCGTCCCTTGCGTGCTCG	TATTTAGTAGAAGCTCAAGA	CAGCGTCCCTTGCGTGCTCG	TATTTAGTAGAAGCTCAAGA
mag1_10-1	BY4741	mag1Δ/mag1Δ	a/α	2n	XIII	112344	109205	SNP	1	A	G	2	A/G	50.9/49.1	81/78	159	A	50.9434	81	G	49.0566	78	GCACCAATGGTTAATCAGTG	GCACGAACCATGAGCAGAAG	GCACCAATGGTTAATCAGTG	GCACGAACCATGAGCAGAAG
mag1_10-1	BY4741	mag1Δ/mag1Δ	a/α	2n	XIII	134332	131193	SNP	1	A	T	1	T	61	94	154	T	61.039	94				ATTAGTTCTATCACTTCCAA	ACTACGGATTTCTTAAAGGA	ATTAGTTCTATCACTTCCAA	ACTACGGATTTCTTAAAGGA
mag1_10-1	BY4741	mag1Δ/mag1Δ	a/α	2n	XIII	173166	170027	SNP	1	C	A	2	C/A	54.6/45.4	71/59	130	C	54.6154	71	A	45.3846	59	GTATAACTGTCAAAACTTTG	AGCAGCGGGCATCCTTCCAT	GTATAACTGTCAAAACTTTG	AGCAGCGGGCATCCTTCCAT
mag1_10-1	BY4741	mag1Δ/mag1Δ	a/α	2n	XIII	181224	178085	SNP	1	T	C	2	C/T	50.4/49.6	71/70	141	C	50.3546	71	T	49.6454	70	TATACAAATATCTTTTTTTA	TGTTTCAGATCATTCGTTTT	TATACAAATATCTTTTTTTA	TGTTTCAGATCATTCGTTTT
mag1_10-1	BY4741	mag1Δ/mag1Δ	a/α	2n	XIII	192014	184687	SNP	1	A	T	2	A/T	54.5/45.5	36/30	66	A	54.5455	36	T	45.4545	30	TTTTTTTTTTTTTTTTTTTC	TTTTTCAACGCGGGTAATAG	TTTTTTTTTTTTTTTTTTTC	TTTTTCAACGCGGGTAATAG
mag1_10-1	BY4741	mag1Δ/mag1Δ	a/α	2n	XIII	195178	187851	SNP	1	T	C	2	T/C	53.1/46.9	95/84	179	T	53.0726	95	C	46.9274	84	TCTTTAACGCCACAATACGA	TGGTATTCTTCCTCTTTGGT	TCTTTAACGCCACAATACGA	TGGTATTCTTCCTCTTTGGT
mag1_10-1	BY4741	mag1Δ/mag1Δ	a/α	2n	XIII	208222	196636	SNP	1	G	T	2	G/T	50.4/49.6	71/70	141	G	50.3546	71	T	49.6454	70	TTTTTTGGGTTTTGATCATC	TTTTGCACAGATATGGTCTG	TTTTTTGGGTTTTGATCATC	TTTTGCACAGATATGGTCTG
mag1_10-1	BY4741	mag1Δ/mag1Δ	a/α	2n	XIII	223860	212274	SNP	1	T	A	2	A/T	50.4/49.6	71/70	141	A	50.3546	71	T	49.6454	70	TCTGCTCTATTGGCTTTTCG	AAGATCGGTTTTTCACTAAT	TCTGCTCTATTGGCTTTTCG	AAGATCGGTTTTTCACTAAT
mag1_10-1	BY4741	mag1Δ/mag1Δ	a/α	2n	XIII	226170	214584	SNP	1	A	G	2	A/G	50.7/49.3	69/67	136	A	50.7353	69	G	49.2647	67	TTTGCATAGTTGAACAAGGG	TAATATGGCGCCATGAACTG	TTTGCATAGTTGAACAAGGG	TAATATGGCGCCATGAACTG
mag1_10-1	BY4741	mag1Δ/mag1Δ	a/α	2n	XIII	289954	278368	SNP	1	C	G	2	C/G	50.0/50.0	75/75	150	C	50	75	G	50	75	ATACGATCCAAATACTTACA	CGCATGTAAAAATATGCCGA	ATACGATCCAAATACTTACA	CGCATGTAAAAATATGCCGA
mag1_10-1	BY4741	mag1Δ/mag1Δ	a/α	2n	XIII	297988	286402	SNP	1	T	G	2	T/G	50.4/49.6	68/67	135	T	50.3704	68	G	49.6296	67	ACTATTAAAATTACCATTCA	GCCTTTCTGAAGCTGTTTAC	ACTATTAAAATTACCATTCA	GCCTTTCTGAAGCTGTTTAC
mag1_10-1	BY4741	mag1Δ/mag1Δ	a/α	2n	XIII	300594	289008	SNP	1	A	G	1	G	58.5	83	142	G	58.4507	83				TCACGGAACTTAGTTATGCG	AAAAGAATTCAGGAAACCAA	TCACGGAACTTAGTTATGCG	AAAAGAATTCAGGAAACCAA
mag1_10-1	BY4741	mag1Δ/mag1Δ	a/α	2n	XIII	302322	290736	SNP	1	A	G	2	A/G	50.4/49.6	69/68	137	A	50.365	69	G	49.635	68	CTTGGTCCCAAACCAAAAGA	TACAGATTAAAGTAGCAAAT	CTTGGTCCCAAACCAAAAGA	TACAGATTAAAGTAGCAAAT
mag1_10-1	BY4741	mag1Δ/mag1Δ	a/α	2n	XIII	327773	316187	SNP	1	T	C	2	C/T	53.5/46.5	68/59	127	C	53.5433	68	T	46.4567	59	CGGATGTTGCTCAAAGGCAG	CTATGAAATTGATTTACCTG	CGGATGTTGCTCAAAGGCAG	CTATGAAATTGATTTACCTG
mag1_10-1	BY4741	mag1Δ/mag1Δ	a/α	2n	XIII	337667	326081	SNP	1	A	G	2	A/G	50.8/49.2	67/65	132	A	50.7576	67	G	49.2424	65	AATACTACATATTTCCGCGC	GTGGCTAAAAGCAAATTTCA	AATACTACATATTTCCGCGC	GTGGCTAAAAGCAAATTTCA
mag1_10-1	BY4741	mag1Δ/mag1Δ	a/α	2n	XIII	358225	346639	SNP	1	T	C	1	C	58.9	43	73	C	58.9041	43				TTTGATTTCCAAGCCAAGAA	GTCATATTGAATTTCCTCAT	TTTGATTTCCAAGCCAAGAA	GTCATATTGAATTTCCTCAT
mag1_10-1	BY4741	mag1Δ/mag1Δ	a/α	2n	XIII	365179	353593	SNP	1	T	C	2	T/C	50.5/49.5	55/54	109	T	50.4587	55	C	49.5413	54	TGTAACCCATTTTGGCCAAA	GGCTGATTATTATTTTGATT	TGTAACCCATTTTGGCCAAA	GGCTGATTATTATTTTGATT
mag1_10-1	BY4741	mag1Δ/mag1Δ	a/α	2n	XIII	421757	406755	SNP	1	T	A	1	A	100	128	128	A	100	128				TTTTGATACGCAATTTGATC	TGTACATCGTCCATCAGTTC	TTTTGATACGCAATTTGATC	TGTACATCGTCCATCAGTTC
mag1_10-1	BY4741	mag1Δ/mag1Δ	a/α	2n	XIII	621567	606565	SNP	1	C	A	1	A	100	120	120	A	100	120				AGCGATGTTGACAAAACCTC	CCAATAGACTCGTTGTCTAT	AGCGATGTTGACAAAACCTC	CCAATAGACTCGTTGTCTAT
mag1_10-1	BY4741	mag1Δ/mag1Δ	a/α	2n	XIII	651084	636082	SNP	1	A	G	2	G/A	51.4/48.6	56/53	109	G	51.3761	56	A	48.6239	53	CAGAGATTTCAGGATGTTGA	CAGTATAGTACTGATTTACA	CAGAGATTTCAGGATGTTGA	CAGTATAGTACTGATTTACA
mag1_10-1	BY4741	mag1Δ/mag1Δ	a/α	2n	XIII	735205	720203	SNP	1	A	T	2	A/T	50.0/50.0	64/64	128	A	50	64	T	50	64	CCCTGTAAAAGCCATAAAAT	CATAAAAAGTTTACCAATTG	CCCTGTAAAAGCCATAAAAT	CATAAAAAGTTTACCAATTG
mag1_10-1	BY4741	mag1Δ/mag1Δ	a/α	2n	XIII	758203	743201	SNP	1	T	G	1	G	99.3	133	134	G	99.2537	133				GCCAACATCGAAGTTTTTGA	GTTGGTAGCGGCTCATCTTC	GCCAACATCGAAGTTTTTGA	GTTGGTAGCGGCTCATCTTC
mag1_10-1	BY4741	mag1Δ/mag1Δ	a/α	2n	XIII	831127	816125	SNP	1	T	A	1	A	100	161	161	A	100	161				ATCGACACCTGTCACAAGCT	GAGCTATCCTGTAAATAGGT	ATCGACACCTGTCACAAGCT	GAGCTATCCTGTAAATAGGT
mag1_10-1	BY4741	mag1Δ/mag1Δ	a/α	2n	XIII	843637	828635	SNP	1	G	A	1	A	97.4	150	154	A	97.4026	150				TATCAACATTAGTGCTTTCC	GAAACATAGAAGTTGGATCC	TATCAACATTAGTGCTTTCC	GAAACATAGAAGTTGGATCC
mag1_10-1	BY4741	mag1Δ/mag1Δ	a/α	2n	XIII	865990	850988	SNP	1	T	C	1	C	99.4	157	158	C	99.3671	157				ATCATCCACTATCAGAACCT	CTTACCCTTAAATTCAGACT	ATCATCCACTATCAGAACCT	CTTACCCTTAAATTCAGACT
mag1_10-1	BY4741	mag1Δ/mag1Δ	a/α	2n	XIV	14561	9418	SNP	1	A	G	1	G	69.2	36	52	G	69.2308	36				CGGTTTTTGGCTATGATGCA	TGAGTACAGTTCCAATTGAA	CGGTTTTTGGCTATGATGCA	TGAGTACAGTTCCAATTGAA
mag1_10-1	BY4741	mag1Δ/mag1Δ	a/α	2n	XIV	45921	40778	SNP	1	T	C	1	C	69.9	128	183	C	69.9454	128				TTTTCCAGTTCTTTTGAGCG	CACATGAAATGGCTCTTTTC	TTTTCCAGTTCTTTTGAGCG	CACATGAAATGGCTCTTTTC
mag1_10-1	BY4741	mag1Δ/mag1Δ	a/α	2n	XIV	102927	97321	SNP	1	A	G	1	G	75	111	148	G	75	111				AAAGCAAGATGCAATCTTTT	ATATGTTTGAGTTTGCTTAA	AAAGCAAGATGCAATCTTTT	ATATGTTTGAGTTTGCTTAA
mag1_10-1	BY4741	mag1Δ/mag1Δ	a/α	2n	XIV	109998	104392	SNP	1	T	C	1	C	61.7	92	149	C	61.745	92				ACGTGATTTTCATACAGATA	TGCAATTCAGGCAATTGTCC	ACGTGATTTTCATACAGATA	TGCAATTCAGGCAATTGTCC
mag1_10-1	BY4741	mag1Δ/mag1Δ	a/α	2n	XIV	135443	129837	SNP	1	T	A	1	A	67	69	103	A	66.9903	69				AAAAGGTTCAGGTGCCTTCT	TATGTGGCGTGTATTTAGAA	AAAAGGTTCAGGTGCCTTCT	TATGTGGCGTGTATTTAGAA
mag1_10-1	BY4741	mag1Δ/mag1Δ	a/α	2n	XIV	138656	133050	SNP	1	A	T	1	T	64.4	76	118	T	64.4068	76				AGAAGACCAGATAGAACATG	GATGGAAGCAATAGATCCAA	AGAAGACCAGATAGAACATG	GATGGAAGCAATAGATCCAA
mag1_10-1	BY4741	mag1Δ/mag1Δ	a/α	2n	XIV	164387	158781	SNP	1	T	C	1	C	62.6	77	123	C	62.6016	77				GTCTACTCATGCAGCTATGT	TTAGTTACACCTAGTAGTTT	GTCTACTCATGCAGCTATGT	TTAGTTACACCTAGTAGTTT
mag1_10-1	BY4741	mag1Δ/mag1Δ	a/α	2n	XIV	165560	159954	SNP	1	A	T	1	T	69.5	98	141	T	69.5035	98				AAACATTGGGGACCGTTTCA	ACACATTCAAATGGCGTTGC	AAACATTGGGGACCGTTTCA	ACACATTCAAATGGCGTTGC
mag1_10-1	BY4741	mag1Δ/mag1Δ	a/α	2n	XIV	165957	160351	SNP	1	A	G	1	G	64.5	89	138	G	64.4928	89				CTTCATCCTGTGACAGCGGA	CCCATTGTAGACCATTTAAA	CTTCATCCTGTGACAGCGGA	CCCATTGTAGACCATTTAAA
mag1_10-1	BY4741	mag1Δ/mag1Δ	a/α	2n	XIV	167455	161849	SNP	1	T	A	1	A	55.3	78	141	A	55.3191	78				TAACATTTCAATCCACTAAT	CCGTCCTCTTTCATACAGTC	TAACATTTCAATCCACTAAT	CCGTCCTCTTTCATACAGTC
mag1_10-1	BY4741	mag1Δ/mag1Δ	a/α	2n	XIV	179558	173952	SNP	1	T	A	1	A	61.7	87	141	A	61.7021	87				GAATTTTTCGCTATCATTAC	AATATCTCTCTCTGTTATAA	GAATTTTTCGCTATCATTAC	AATATCTCTCTCTGTTATAA
mag1_10-1	BY4741	mag1Δ/mag1Δ	a/α	2n	XIV	212925	207319	SNP	1	A	G	1	G	67.6	92	136	G	67.6471	92				GAATATTCAAACCTCTTTAA	AACGCCTGAAAAACTAAAGA	GAATATTCAAACCTCTTTAA	AACGCCTGAAAAACTAAAGA
mag1_10-1	BY4741	mag1Δ/mag1Δ	a/α	2n	XIV	213588	207982	SNP	1	C	T	1	T	67.3	101	150	T	67.3333	101				TACTCCAGACTTGACGAAGT	TCCTGCTAGCAGCATTTTAA	TACTCCAGACTTGACGAAGT	TCCTGCTAGCAGCATTTTAA
mag1_10-1	BY4741	mag1Δ/mag1Δ	a/α	2n	XIV	213714	208108	SNP	1	A	T	1	T	66.2	96	145	T	66.2069	96				GGACGATAGTGGTCCACTAA	AAAAGATGACATATTTTTAG	GGACGATAGTGGTCCACTAA	AAAAGATGACATATTTTTAG
mag1_10-1	BY4741	mag1Δ/mag1Δ	a/α	2n	XIV	288267	282661	SNP	1	C	T	1	T	71.7	91	127	T	71.6535	91				TTGGAGGAAAAAACTTCCCT	TACAACTATACTCTTTGATG	TTGGAGGAAAAAACTTCCCT	TACAACTATACTCTTTGATG
mag1_10-1	BY4741	mag1Δ/mag1Δ	a/α	2n	XIV	361675	356066	SNP	1	A	G	1	G	72.8	75	103	G	72.8155	75				AGTACCTTTCGAATATTTCC	AAGTCGAATTTCTAAAGTCG	AGTACCTTTCGAATATTTCC	AAGTCGAATTTCTAAAGTCG
mag1_10-1	BY4741	mag1Δ/mag1Δ	a/α	2n	XIV	397801	392192	SNP	1	T	C	1	C	65.5	74	113	C	65.4867	74				TTACAAGTTTTTCAATCATT	TGAGGGGTTAGGATTATGAT	TTACAAGTTTTTCAATCATT	TGAGGGGTTAGGATTATGAT
mag1_10-1	BY4741	mag1Δ/mag1Δ	a/α	2n	XIV	473409	467801	SNP	1	A	T	1	T	70.1	96	137	T	70.073	96				GCATGACACAAATTCATCAG	TAAACGATATAGATGTTCAT	GCATGACACAAATTCATCAG	TAAACGATATAGATGTTCAT
mag1_10-1	BY4741	mag1Δ/mag1Δ	a/α	2n	XIV	606199	600227	SNP	1	T	C	2	T/C	50.8/49.2	60/58	118	T	50.8475	60	C	49.1525	58	ATATATCTTTTGTCCTCCTC	CCAGTTACTTTTGCGCCAGA	ATATATCTTTTGTCCTCCTC	CCAGTTACTTTTGCGCCAGA
mag1_10-1	BY4741	mag1Δ/mag1Δ	a/α	2n	XIV	638007	632035	SNP	1	A	G	2	G/A	53.5/46.5	77/67	144	G	53.4722	77	A	46.5278	67	ACCCCAACAGCCATCACCTC	ACCTCAACCTATCCATTCCG	ACCCCAACAGCCATCACCTC	ACCTCAACCTATCCATTCCG
mag1_10-1	BY4741	mag1Δ/mag1Δ	a/α	2n	XIV	715086	709114	SNP	1	T	C	2	C/T	53.5/46.5	92/80	172	C	53.4884	92	T	46.5116	80	TCCAATTCTCTTAAGGCAGG	GAGATGTAAGAGGAAGTGAC	TCCAATTCTCTTAAGGCAGG	GAGATGTAAGAGGAAGTGAC
mag1_10-1	BY4741	mag1Δ/mag1Δ	a/α	2n	XIV	718371	712399	SNP	1	G	C	2	G/C	53.4/46.6	62/54	116	G	53.4483	62	C	46.5517	54	TCGAGGGTATGACTTCAAAT	CAACTATTAGTGACAAGGTA	TCGAGGGTATGACTTCAAAT	CAACTATTAGTGACAAGGTA
mag1_10-1	BY4741	mag1Δ/mag1Δ	a/α	2n	XIV	718929	712957	SNP	1	T	A	2	A/T	52.6/47.4	81/73	154	A	52.5974	81	T	47.4026	73	TTAACGTCCGCCGGTTGCGA	AGAACTTTTAACCGTAACAA	TTAACGTCCGCCGGTTGCGA	AGAACTTTTAACCGTAACAA
mag1_10-1	BY4741	mag1Δ/mag1Δ	a/α	2n	XIV	731327	725355	SNP	1	A	T	2	A/T	50.7/49.3	73/71	144	A	50.6944	73	T	49.3056	71	TGTTATGGTTTGTGCAGTTG	GATAGCTCAGTAAAATGGCT	TGTTATGGTTTGTGCAGTTG	GATAGCTCAGTAAAATGGCT
mag1_10-1	BY4741	mag1Δ/mag1Δ	a/α	2n	XIV	772611	766639	SNP	1	T	A	2	T/A	52.1/47.9	25/23	48	T	52.0833	25	A	47.9167	23	ATTCTTTCTCATTTGATAAA	CAAAAAAAAAAAAAAAAAAA	ATTCTTTCTCATTTGATAAA	AAAAAAAAAAAAAAAAAAAA
mag1_10-1	BY4741	mag1Δ/mag1Δ	a/α	2n	XIV	772612	766640	SNP	1	C	A	2	A/C	50.0/50.0	27/27	54	A	50	27	C	50	27	TTCTTTCTCATTTGATAAAT	AAAAAAAAAAAAAAAAAAAA	TTCTTTCTCATTTGATAAAT	AAAAAAAAAAAAAAAAAAAA
mag1_10-1	BY4741	mag1Δ/mag1Δ	a/α	2n	XIV	776238	770266	SNP	1	T	C	2	C/T	50.5/49.5	54/53	107	C	50.4673	54	T	49.5327	53	GTTGGTATTGGAAGAGTGGA	TCAAAACTCTTTAGAGTTTT	GTTGGTATTGGAAGAGTGGA	TCAAAACTCTTTAGAGTTTT
mag1_10-1	BY4741	mag1Δ/mag1Δ	a/α	2n	XV	161632	158533	SNP	1	A	G	1	G	72	134	186	G	72.043	134				TATTGTTCGCACCACCGGCA	ACTCGCGTCTCGCAAGTCTT	TATTGTTCGCACCACCGGCA	ACTCGCGTCTCGCAAGTCTT
mag1_10-1	BY4741	mag1Δ/mag1Δ	a/α	2n	XV	384726	381627	SNP	1	A	T	1	T	62.9	88	140	T	62.8571	88				TTTGCCTAGTACTCCTTCCT	CCCTCTTCCTCATAGATTTA	TTTGCCTAGTACTCCTTCCT	CCCTCTTCCTCATAGATTTA
mag1_10-1	BY4741	mag1Δ/mag1Δ	a/α	2n	XV	613807	607809	SNP	1	T	G	1	G	99.4	168	169	G	99.4083	168				TTTAACCCATCTTGGTTTGT	GTGACTAAAACTTGATCAAC	TTTAACCCATCTTGGTTTGT	GTGACTAAAACTTGATCAAC
mag1_10-1	BY4741	mag1Δ/mag1Δ	a/α	2n	XV	661838	655840	SNP	1	A	G	1	G	100	165	165	G	100	165				TTCGACGGTTTGTGGTTTCG	CGCGCAATGTGAAAGATCTT	TTCGACGGTTTGTGGTTTCG	CGCGCAATGTGAAAGATCTT
mag1_10-1	BY4741	mag1Δ/mag1Δ	a/α	2n	XV	663009	657011	SNP	1	A	T	1	T	99.4	170	171	T	99.4152	170				GATCGTTGGCCTACAAATGA	GGTCTAATCAAGGCCTTCTC	GATCGTTGGCCTACAAATGA	GGTCTAATCAAGGCCTTCTC
mag1_10-1	BY4741	mag1Δ/mag1Δ	a/α	2n	XV	678355	672357	SNP	1	G	A	2	G/A	53.8/46.2	93/80	173	G	53.7572	93	A	46.2428	80	AGACTTAACTTTACCAGCAC	AGCTAGAGAACCGTGAACTT	AGACTTAACTTTACCAGCAC	AGCTAGAGAACCGTGAACTT
mag1_10-1	BY4741	mag1Δ/mag1Δ	a/α	2n	XV	740574	733572	SNP	1	T	C	1	C	100	169	169	C	100	169				TCACGGATTTTTGTTTTCAG	TCTATTGGCTGGTCTGCCGC	TCACGGATTTTTGTTTTCAG	TCTATTGGCTGGTCTGCCGC
mag1_10-1	BY4741	mag1Δ/mag1Δ	a/α	2n	XV	773810	766808	SNP	1	G	A	1	A	99.4	175	176	A	99.4318	175				AACCATACAGTGTCACATCT	ATGTATGGTCACTTGGATTA	AACCATACAGTGTCACATCT	ATGTATGGTCACTTGGATTA
mag1_10-1	BY4741	mag1Δ/mag1Δ	a/α	2n	XV	779980	772978	SNP	1	A	G	1	G	66.1	117	177	G	66.1017	117				CAGCGCCTTAAGGCGAAGGC	AAATCCTGAAAATTTTCTCA	CAGCGCCTTAAGGCGAAGGC	AATCCTGAAAATTTTCTCAT
mag1_10-1	BY4741	mag1Δ/mag1Δ	a/α	2n	XV	781559	774557	SNP	1	A	T	1	T	100	139	139	T	100	139				TGAAACCTCTCCGCCCGTAT	TTTTTTTTAATATGTTAAAT	TGAAACCTCTCCGCCCGTAT	TTTTTTTTAATATGTTAAAT
mag1_10-1	BY4741	mag1Δ/mag1Δ	a/α	2n	XV	786899	779897	SNP	1	T	C	1	C	63.7	135	212	C	63.6792	135				CTACCCCATAGAATTCGTCT	ATAAGTCTATACCCTCAAAA	CTACCCCATAGAATTCGTCT	ATAAGTCTATACCCTCAAAA
mag1_10-1	BY4741	mag1Δ/mag1Δ	a/α	2n	XV	790699	783697	SNP	1	G	C	1	C	98.9	188	190	C	98.9474	188				AACTGAGTCGATATCCTCTT	AGTTACTGCTTTTGCACGAA	AACTGAGTCGATATCCTCTT	AGTTACTGCTTTTGCACGAA
mag1_10-1	BY4741	mag1Δ/mag1Δ	a/α	2n	XV	804748	797746	SNP	1	A	G	1	G	98.9	187	189	G	98.9418	187				AAATGCTCAGAATGTCATCA	CATAACGTGTTTGTCTATTT	AAATGCTCAGAATGTCATCA	CATAACGTGTTTGTCTATTT
mag1_10-1	BY4741	mag1Δ/mag1Δ	a/α	2n	XV	854192	847190	SNP	1	G	A	1	A	74.6	150	201	A	74.6269	150				ATCAAGCTTAAAAATTGGAC	CAACCGGAATCGAACCGATG	ATCAAGCTTAAAAATTGGAC	CAACCGGAATCGAACCGATG
mag1_10-1	BY4741	mag1Δ/mag1Δ	a/α	2n	XV	874341	867339	SNP	1	A	G	1	G	98.3	177	180	G	98.3333	177				TGTTTCCTTTTGATTGTGAA	TAAAGGCGAATCCTAACAAA	TGTTTCCTTTTGATTGTGAA	TAAAGGCGAATCCTAACAAA
mag1_10-1	BY4741	mag1Δ/mag1Δ	a/α	2n	XV	934595	927593	SNP	1	T	A	1	A	99.1	222	224	A	99.1071	222				TGGAAAAACTTATGCTACGA	ATCCCGATTAAGAATGGGAA	TGGAAAAACTTATGCTACGA	ATCCCGATTAAGAATGGGAA
mag1_10-1	BY4741	mag1Δ/mag1Δ	a/α	2n	XV	1008845	1001379	SNP	1	A	G	1	G	64.2	156	243	G	64.1975	156				AACCGGAACCTACCATGATG	TGATGAACCATGTCACTTGA	AACCGGAACCTACCATGATG	TGATGAACCATGTCACTTGA
mag1_10-1	BY4741	mag1Δ/mag1Δ	a/α	2n	XVI	9270	2842	SNP	1	T	A	2	T/A	51.4/48.6	18/17	35	T	51.4286	18	A	48.5714	17	AGAAAGCTGAAAAACTGCAG	GTTAGTAGAGTTGTAAGCAT	AGAAAGCTGAAAAACTGCAG	GTTAGTAGAGTTGTAAGCAT
mag1_10-1	BY4741	mag1Δ/mag1Δ	a/α	2n	XVI	118167	106638	SNP	1	T	C	2	T/C	52.0/48.0	89/82	171	T	52.0468	89	C	47.9532	82	CTACATTTTAGTTAGTTTCG	CGTAAGTTATGGTAATAAAG	CTACATTTTAGTTAGTTTCG	CGTAAGTTATGGTAATAAAG
mag1_10-1	BY4741	mag1Δ/mag1Δ	a/α	2n	XVI	220952	209423	SNP	1	G	C	1	C	98.6	139	141	C	98.5816	139				TAAGAGACTTTCTATTCCTT	AAAAAATACCTCTAGTTTTT	TAAGAGACTTTCTATTCCTT	AAAAAATACCTCTAGTTTTT
mag1_10-1	BY4741	mag1Δ/mag1Δ	a/α	2n	XVI	267264	255735	SNP	1	T	C	1	C	99.3	148	149	C	99.3289	148				CAAAAGCAGATGCATGCGTA	CGTGATCTTTCTTGCTAATC	CAAAAGCAGATGCATGCGTA	CGTGATCTTTCTTGCTAATC
mag1_10-1	BY4741	mag1Δ/mag1Δ	a/α	2n	XVI	270282	258753	SNP	1	A	G	1	G	98.5	131	133	G	98.4962	131				GGGATTTAAGCATTGTATCG	CTGCGTCGAGCACCTCTGAA	GGGATTTAAGCATTGTATCG	CTGCGTCGAGCACCTCTGAA
mag1_10-1	BY4741	mag1Δ/mag1Δ	a/α	2n	XVI	373132	361603	SNP	1	A	G	1	G	99.2	117	118	G	99.1525	117				AATTTTATTTAATCTGTATA	TAATAATAAACCGATTTAAA	AATTTTATTTAATCTGTATA	TAATAATAAACCGATTTAAA
mag1_10-1	BY4741	mag1Δ/mag1Δ	a/α	2n	XVI	374055	362526	SNP	1	A	T	2	A/T	51.1/48.1	68/64	133	A	51.1278	68	T	48.1203	64	TGACTTTTTCAGAAATATGA	GCACAATTTATTTTGGGGTA	TGACTTTTTCAGAAATATGA	GCACAATTTATTTTGGGGTA
mag1_10-1	BY4741	mag1Δ/mag1Δ	a/α	2n	XVI	421027	409498	SNP	1	A	G	2	A/G	52.0/48.0	65/60	125	A	52	65	G	48	60	CATCAGGGAATCATACAAGA	CACAACTGGCGGCATGCAAT	CATCAGGGAATCATACAAGA	CACAACTGGCGGCATGCAAT
mag1_10-1	BY4741	mag1Δ/mag1Δ	a/α	2n	XVI	421893	410364	SNP	1	A	G	2	A/G	54.1/45.9	79/67	146	A	54.1096	79	G	45.8904	67	CGGAACCAAAGTTTGAAGAG	TCAAAGATATTTTATATGAG	CGGAACCAAAGTTTGAAGAG	TCAAAGATATTTTATATGAG
mag1_10-1	BY4741	mag1Δ/mag1Δ	a/α	2n	XVI	498282	483474	SNP	1	A	T	2	A/T	53.7/46.3	65/56	121	A	53.719	65	T	46.281	56	TTGGTAACGTTCTTTCTGCC	ATTTGGGCCAAGCTCCGGCC	TTGGTAACGTTCTTTCTGCC	ATTTGGGCCAAGCTCCGGCC
mag1_10-1	BY4741	mag1Δ/mag1Δ	a/α	2n	XVI	555628	540820	SNP	1	A	G	2	G/A	50.8/49.2	61/59	120	G	50.8333	61	A	49.1667	59	ATTATGATGCCCTAGATCAA	CTGATCCAGAAAAGGCAAGA	ATTATGATGCCCTAGATCAA	CTGATCCAGAAAAGGCAAGA
mag1_10-1	BY4741	mag1Δ/mag1Δ	a/α	2n	XVI	637326	622518	SNP	1	T	C	1	C	99.3	139	140	C	99.2857	139				AATTTGAATCGATTTATTTT	CATTATACATGTCTAGTTTT	AATTTGAATCGATTTATTTT	CATTATACATGTCTAGTTTT
mag1_10-1	BY4741	mag1Δ/mag1Δ	a/α	2n	XVI	672378	657570	SNP	1	T	C	1	C	56.4	75	133	C	56.391	75				GTCTGGGTGCATCGCTGTTG	TGCTTCGGTAGATTTATTAG	GTCTGGGTGCATCGCTGTTG	TGCTTCGGTAGATTTATTAG
mag1_10-1	BY4741	mag1Δ/mag1Δ	a/α	2n	XVI	689417	674609	SNP	1	A	G	2	G/A	53.2/46.8	82/72	154	G	53.2468	82	A	46.7532	72	AATATGAATAATAGTCAAAA	ATAATATATAATATTCATTC	AATATGAATAATAGTCAAAA	ATAATATATAATATTCATTC
mag1_10-1	BY4741	mag1Δ/mag1Δ	a/α	2n	XVI	748298	733490	SNP	1	A	T	1	T	55.4	77	139	T	55.3957	77				AGCATGAAAATACGCTTAGA	GAAGTAAAGAATTTGGAATT	AGCATGAAAATACGCTTAGA	GAAGTAAAGAATTTGGAATT
mag1_10-1	BY4741	mag1Δ/mag1Δ	a/α	2n	XVI	752587	737779	SNP	1	A	T	2	T/A	53.1/46.9	78/69	147	T	53.0612	78	A	46.9388	69	AATTAATGCTGGGCTTGGAT	TTACTAGTCACTACATGCAT	AATTAATGCTGGGCTTGGAT	TTACTAGTCACTACATGCAT
mag1_10-1	BY4741	mag1Δ/mag1Δ	a/α	2n	XVI	753066	738258	SNP	1	A	G	2	A/G	54.6/45.4	77/64	141	A	54.6099	77	G	45.3901	64	GATTATACTTGGCACAACAA	TGCTCAAATAAACGAAAAAT	GATTATACTTGGCACAACAA	TGCTCAAATAAACGAAAAAT
mag1_10-1	BY4741	mag1Δ/mag1Δ	a/α	2n	XVI	770134	755326	SNP	1	A	G	2	G/A	53.8/46.2	93/80	173	G	53.7572	93	A	46.2428	80	CTATACAGAGTATTATCGTA	TGTCTTACCTTTAGCTTGTC	CTATACAGAGTATTATCGTA	TGTCTTACCTTTAGCTTGTC
mag1_10-1	BY4741	mag1Δ/mag1Δ	a/α	2n	XVI	894255	871109	SNP	1	T	C	2	T/C	54.7/45.3	93/77	170	T	54.7059	93	C	45.2941	77	CATCAAACTTCCCTTTAAAG	TTCAATGTCTTTTTCCAGTG	CATCAAACTTCCCTTTAAAG	TTCAATGTCTTTTTCCAGTG
mag1_10-1	BY4741	mag1Δ/mag1Δ	a/α	2n	XVI	926949	903803	SNP	1	A	G	2	A/G	53.8/46.3	86/74	160	A	53.75	86	G	46.25	74	TTCACTCATAATTTCTAATA	TTCAACAGCAATATTGCGTA	TTCACTCATAATTTCTAATA	TTCAACAGCAATATTGCGTA
mag1_10-1	BY4741	mag1Δ/mag1Δ	a/α	2n	XII	5669	1680	DIP	1	C	-	2	C/-	54.1/45.3	86/72	159	C	54.0881	86	-	45.283	72	TGACATATATATACACCACA	CCCACACACCACACCCACAC	TGACATATATATACACCACA	CCACACACCACACCACACAC
mag1_10-1	BY4741	mag1Δ/mag1Δ	a/α	2n	XII	5684	1695	DIP	1	-	A	1	A	54.7	104	190	A	54.7368	104				CCACACCCACACACCACACC	CACACCACACCCACACCCAC	CCACACCCACACACCACACC	CACACCACA-CCACACCCAC
mag1_10-1	BY4741	mag1Δ/mag1Δ	a/α	2n	XII	5693	1705	DIP	1	C	-	1	-	65.2	137	210	-	65.2381	137				CACACCACACCCACACCACA	CCCACACCCACACACACCAC	ACACCACACCACACACCACA	CCACACCCACACAC-CCACA
mag1_10-2	BY4741	mag1Δ/mag1Δ	a/α	2n	I	34	34	SNP	1	A	C	1	C	81.8	18	22	C	81.8182	18				ACACACCCACACACCACACC	CACACCACACCACACCCACA	ACACACCCACACACCACACC	CACACCACACCACACCCACA
mag1_10-2	BY4741	mag1Δ/mag1Δ	a/α	2n	I	36	36	SNP	1	A	C	2	C/A	54.5/45.5	18/15	33	C	54.5455	18	A	45.4545	15	ACACCCACACACCACACCAC	CACCACACCACACCCACACA	ACACCCACACACCACACCAC	CACCACACCACACCCACACA
mag1_10-2	BY4741	mag1Δ/mag1Δ	a/α	2n	I	12495	12495	SNP	1	T	C	2	C/T	51.4/48.6	56/53	109	C	51.3761	56	T	48.6239	53	GTAGTGGTAGCAGGTGGTAA	GAAGAAGCAGTTTCCTGGCT	GTAGTGGTAGCAGGTGGTAA	GAAGAAGCAGTTTCCTGGCT
mag1_10-2	BY4741	mag1Δ/mag1Δ	a/α	2n	I	15873	15873	SNP	1	T	A	2	A/T	51.6/48.4	63/59	122	A	51.6393	63	T	48.3607	59	AAATTAGCAGCAAAAAAATT	TTAATAACGAAACTATAAGG	AAATTAGCAGCAAAAAAATT	TTAATAACGAAACTATAAGG
mag1_10-2	BY4741	mag1Δ/mag1Δ	a/α	2n	I	16316	16316	SNP	1	T	A	1	A	55.4	62	112	A	55.3571	62				CTGATGCACGTTCTTTAGAC	ACCTATAAACACCATTCTTA	CTGATGCACGTTCTTTAGAC	ACCTATAAACACCATTCTTA
mag1_10-2	BY4741	mag1Δ/mag1Δ	a/α	2n	I	23385	23387	SNP	1	A	T	2	T/A	51.7/48.3	46/43	89	T	51.6854	46	A	48.3146	43	TACTAGTGCAAAAGAATTCG	AATAAATATAAAAGAACAAG	TACTAGTGCAAAAGAATTCG	AATAAATATAAAAGAACAAG
mag1_10-2	BY4741	mag1Δ/mag1Δ	a/α	2n	I	40556	40358	SNP	1	A	G	2	A/G	51.2/48.8	62/59	121	A	51.2397	62	G	48.7603	59	AGTACAACCTTCCAAATATA	TGCATATCCGACAATGTCAT	AGTACAACCTTCCAAATATA	TGCATATCCGACAATGTCAT
mag1_10-2	BY4741	mag1Δ/mag1Δ	a/α	2n	I	60604	60406	SNP	1	G	A	2	A/G	54.1/45.9	53/45	98	A	54.0816	53	G	45.9184	45	CCAGCCATTGTTCGACATCC	TTTCATCGTCAACGGTGGCA	CCAGCCATTGTTCGACATCC	TTTCATCGTCAACGGTGGCA
mag1_10-2	BY4741	mag1Δ/mag1Δ	a/α	2n	I	73146	72948	SNP	1	A	G	2	A/G	50.7/49.3	37/36	73	A	50.6849	37	G	49.3151	36	ACCTGTCTCTGACTGGACTG	TGATGTTGAAGCCCGTATCA	ACCTGTCTCTGACTGGACTG	TGATGTTGAAGCCCGTATCA
mag1_10-2	BY4741	mag1Δ/mag1Δ	a/α	2n	I	73245	73047	SNP	1	C	A	2	A/C	53.9/46.1	48/41	89	A	53.9326	48	C	46.0674	41	TTCCATCCAAGGTTTCAAGG	CGGTGCTGGTCACTCCAACA	TTCCATCCAAGGTTTCAAGG	CGGTGCTGGTCACTCCAACA
mag1_10-2	BY4741	mag1Δ/mag1Δ	a/α	2n	I	208004	205748	SNP	1	G	T	1	T	57.3	63	110	T	57.2727	63				TTCATTGCGTCCTTATTGCT	GCAATTATTTAATAAAATTC	TTCATTGCGTCCTTATTGCT	GCAATTATTTAATAAAATTC
mag1_10-2	BY4741	mag1Δ/mag1Δ	a/α	2n	I	208649	206393	SNP	1	T	C	2	T/C	51.0/48.1	53/50	104	T	50.9615	53	C	48.0769	50	TTGCACTAGTATTTAAAATA	CAGCAGAGGTGTAAAAGTGC	TTGCACTAGTATTTAAAATA	CAGCAGAGGTGTAAAAGTGC
mag1_10-2	BY4741	mag1Δ/mag1Δ	a/α	2n	II	6072	3547	SNP	1	T	C	1	C	88.9	16	18	C	88.8889	16				ACCACTTACCCTGCCATTAC	CTACCATCCACCATCTGCTA	ACCACTTACCCTACCATTAC	CTACCATCCACCATCTGCTA
mag1_10-2	BY4741	mag1Δ/mag1Δ	a/α	2n	II	6098	3573	SNP	1	C	T	1	T	93.1	27	29	T	93.1034	27				ATCCACCATCTGCTACTCAC	ATACTGTTGTTCTACCCTCC	ATCCACCATCTGCTACTCAC	ATACTGTTGTTCTACCCACC
mag1_10-2	BY4741	mag1Δ/mag1Δ	a/α	2n	II	6116	3591	SNP	1	T	A	1	A	97.1	33	34	A	97.0588	33				ACCATACTGTTGTTCTACCC	CCATATTGAAACGTTAACAA	ACTATACTGTTGTTCTACCC	CCATATTGAAACGTTAACAA
mag1_10-2	BY4741	mag1Δ/mag1Δ	a/α	2n	II	8337	5811	SNP	1	T	C	2	C/T	51.3/48.7	59/56	115	C	51.3043	59	T	48.6957	56	AAAACCCTTTTGCGCGCCTG	TAAGTTTCCGTTTTCAGTCA	AAAACCCTTTTGCGCGCCTG	TAAGTTTCCGTTTTCAGTCA
mag1_10-2	BY4741	mag1Δ/mag1Δ	a/α	2n	II	11385	8859	SNP	1	T	C	2	C/T	52.2/47.8	59/54	113	C	52.2124	59	T	47.7876	54	GAATGACAATGTCACCATTT	CTAATATAGATGAATTTTCA	GAATGACAATGTCACCATTT	CTAATATAGATGAATTTTCA
mag1_10-2	BY4741	mag1Δ/mag1Δ	a/α	2n	II	17088	14562	SNP	1	T	C	2	C/T	53.3/46.7	57/50	107	C	53.271	57	T	46.729	50	ACGCCAGTCAGTTGTTTTCT	CGGAATTTCGGTTGTTGATT	ACGCCAGTCAGTTGTTTTCT	CGGAATTTCGGTTGTTGATT
mag1_10-2	BY4741	mag1Δ/mag1Δ	a/α	2n	II	33121	30379	SNP	1	A	G	2	A/G	53.0/47.0	53/47	100	A	53	53	G	47	47	TTGGGTGGTACGGAGGAACC	TATATTCAACGAAATAGTGA	TTGGGTGGTACGGAGGAACC	TATATTCAACGAAATAGTGA
mag1_10-2	BY4741	mag1Δ/mag1Δ	a/α	2n	II	55177	52435	SNP	1	A	G	2	G/A	52.6/47.4	60/54	114	G	52.6316	60	A	47.3684	54	CAAGTTTTTATTTTGATGAG	TCCCGATGCTCTAAAAGCTT	CAAGTTTTTATTTTGATGAG	TCCCGATGCTCTAAAAGCTT
mag1_10-2	BY4741	mag1Δ/mag1Δ	a/α	2n	II	86882	84140	SNP	1	T	C	2	T/C	54.3/45.7	70/59	129	T	54.2636	70	C	45.7364	59	CCATTATCTTTTCTGTGTTG	GTAGGGAGTTTTTTTGAAAT	CCATTATCTTTTCTGTGTTG	GTAGGGAGTTTTTTTGAAAT
mag1_10-2	BY4741	mag1Δ/mag1Δ	a/α	2n	II	103058	100311	SNP	1	A	T	2	T/A	52.1/47.9	62/57	119	T	52.1008	62	A	47.8992	57	GCAACTATATCACCTGCGAA	ATATCCATGGAAGAGACTGC	GCAACTATATCACCTGCGAA	ATATCCATGGAAGAGACTGC
mag1_10-2	BY4741	mag1Δ/mag1Δ	a/α	2n	II	103949	101202	SNP	1	A	G	2	A/G	54.0/46.0	68/58	126	A	53.9683	68	G	46.0317	58	TCCATAAACGAAATATCGCA	AATTGCACCACTAACTTGAA	TCCATAAACGAAATATCGCA	AATTGCACCACTAACTTGAA
mag1_10-2	BY4741	mag1Δ/mag1Δ	a/α	2n	II	108748	106001	SNP	1	A	G	2	G/A	53.0/47.0	61/54	115	G	53.0435	61	A	46.9565	54	TACCGTTATGCACAGAATCT	GAACATCAATAAATATATCA	TACCGTTATGCACAGAATCT	GAACATCAATAAATATATCA
mag1_10-2	BY4741	mag1Δ/mag1Δ	a/α	2n	II	110063	107316	SNP	1	T	A	2	T/A	51.7/48.3	60/56	116	T	51.7241	60	A	48.2759	56	CTTGAAAACTGTACTCTGCC	TTTATTTACAAGGGATATTG	CTTGAAAACTGTACTCTGCC	TTTATTTACAAGGGATATTG
mag1_10-2	BY4741	mag1Δ/mag1Δ	a/α	2n	II	145867	143120	SNP	1	T	C	2	C/T	51.9/48.1	27/25	52	C	51.9231	27	T	48.0769	25	TAAATTTTATTCTATGCTTT	CCTCTCGATGAGATGAGCTG	TAAATTTTATTCTATGCTTT	CCTCTCGATGAGATGAGCTG
mag1_10-2	BY4741	mag1Δ/mag1Δ	a/α	2n	II	176528	173781	SNP	1	T	C	2	C/T	51.0/49.0	51/49	100	C	51	51	T	49	49	TTGAATTTGACATATTTTAA	TGAGGGAAGACTCCTGTTCT	TTGAATTTGACATATTTTAA	TGAGGGAAGACTCCTGTTCT
mag1_10-2	BY4741	mag1Δ/mag1Δ	a/α	2n	II	182869	180122	SNP	1	A	T	2	T/A	53.3/46.7	57/50	107	T	53.271	57	A	46.729	50	TTTTTCTTATCTGGCTGAGT	TCATCGTGGAGCTGTTAAGC	TTTTTCTTATCTGGCTGAGT	TCATCGTGGAGCTGTTAAGC
mag1_10-2	BY4741	mag1Δ/mag1Δ	a/α	2n	II	212923	210176	SNP	1	T	C	2	T/C	52.0/48.0	52/48	100	T	52	52	C	48	48	GTATTGAAGGTATTCATCGT	TGTGGTTGCTGTTGTTGAAG	GTATTGAAGGTATTCATCGT	TGTGGTTGCTGTTGTTGAAG
mag1_10-2	BY4741	mag1Δ/mag1Δ	a/α	2n	II	218791	216044	SNP	1	T	A	1	A	55.7	49	88	A	55.6818	49				TTTAGTGTCATTGCTAGAAA	CCAAAATGAAATTGATGAGC	TTTAGTGTCATTGCTAGAAA	CCAAAATGAAATTGATGAGC
mag1_10-2	BY4741	mag1Δ/mag1Δ	a/α	2n	II	221724	218975	SNP	1	A	G	1	G	57.6	38	66	G	57.5758	38				GGCACAATCACAGTTTACAC	ATATCCACAATATGTTGGAA	GGCACAATCACAGTTTACAC	ATATCCACAATATGTTGGAA
mag1_10-2	BY4741	mag1Δ/mag1Δ	a/α	2n	II	224889	221901	SNP	1	A	G	1	G	57.4	31	54	G	57.4074	31				GATCATTAGAAGATAATGAA	CTGAAATTAAGGTATCACGA	GATCATTAGAAGATAATGAA	CTGAAATTAAGGTATCACGA
mag1_10-2	BY4741	mag1Δ/mag1Δ	a/α	2n	II	250954	247966	SNP	1	T	C	2	T/C	52.1/47.9	49/45	94	T	52.1277	49	C	47.8723	45	ACCTCTGAAGAGTTAGCTTT	CTTTCTTGATCGTCGCTTCC	ACCTCTGAAGAGTTAGCTTT	CTTTCTTGATCGTCGCTTCC
mag1_10-2	BY4741	mag1Δ/mag1Δ	a/α	2n	II	255616	252628	SNP	1	T	A	2	T/A	53.1/46.9	51/45	96	T	53.125	51	A	46.875	45	ATACCTTGGATGTTATCTCT	AGAATCTTTCTGTGACGCTT	ATACCTTGGATGTTATCTCT	AGAATCTTTCTGTGACGCTT
mag1_10-2	BY4741	mag1Δ/mag1Δ	a/α	2n	II	347644	343931	SNP	1	T	A	2	T/A	52.1/47.9	49/45	94	T	52.1277	49	A	47.8723	45	AAGGCGGCAGACTTAAGATC	GTTGGACGGTTGTCCGCGCG	AAGGCGGCAGACTTAAGATC	GTTGGACGGTTGTCCGCGCG
mag1_10-2	BY4741	mag1Δ/mag1Δ	a/α	2n	II	367903	364190	SNP	1	G	C	1	C	55.2	53	96	C	55.2083	53				AAAATTATTGTGGATGCCCA	ATATCTTCTTGGTCATTGTT	AAAATTATTGTGGATGCCCA	ATATCTTCTTGGTCATTGTT
mag1_10-2	BY4741	mag1Δ/mag1Δ	a/α	2n	II	428702	424988	SNP	1	T	C	2	C/T	51.8/48.2	44/41	85	C	51.7647	44	T	48.2353	41	AGTGTATGGATTCAAAACAT	GTCTGAGTTGGCAAAAGTGG	AGTGTATGGATTCAAAACAT	GTCCGAGTTGGCAAAAGTGG
mag1_10-2	BY4741	mag1Δ/mag1Δ	a/α	2n	II	428706	424992	SNP	1	T	C	2	C/T	51.8/48.2	44/41	85	C	51.7647	44	T	48.2353	41	TATGGATTCAAAACATTGTC	GAGTTGGCAAAAGTGGTTTC	TATGGATTCAAAACATCGTC	GAGTTGGCAAAAGTGGTTTC
mag1_10-2	BY4741	mag1Δ/mag1Δ	a/α	2n	II	444210	440496	SNP	1	T	C	2	C/T	51.0/49.0	49/47	96	C	51.0417	49	T	48.9583	47	TTCTGAGATATCTTTGTGGT	TCTTATTAGATTAGATAGTG	TTCTGAGATATCTTTGTGGT	TCTTATTAGATTAGATAGTG
mag1_10-2	BY4741	mag1Δ/mag1Δ	a/α	2n	II	453647	449933	SNP	1	T	A	2	A/T	50.0/50.0	41/41	82	A	50	41	T	50	41	ACACTAAATTGTAATGTCTC	GGGATTTTGTGGGGTGTCAT	ACACTAAATTGTAATGTCTC	GGGATTTTGTGGGGTGTCAT
mag1_10-2	BY4741	mag1Δ/mag1Δ	a/α	2n	II	457914	454200	SNP	1	T	C	2	T/C	53.8/46.2	49/42	91	T	53.8462	49	C	46.1538	42	GGAGCAAAAAATCACAAGGA	GCACCTATTTAGATAACAAA	GGAGCAAAAAATCACAAGGA	GCACCTATTTAGATAACAAA
mag1_10-2	BY4741	mag1Δ/mag1Δ	a/α	2n	II	460177	456463	SNP	1	T	C	2	C/T	51.8/48.2	44/41	85	C	51.7647	44	T	48.2353	41	AAGCTGAGAACAGATGGCAA	CAAATTGGGAACGAACAATG	AAGCTGAGAACAGATGGCAA	CAAATTGGGAACGAACAATG
mag1_10-2	BY4741	mag1Δ/mag1Δ	a/α	2n	II	496595	492881	SNP	1	T	A	1	A	55.4	46	83	A	55.4217	46				TGAGATTTTCGTTCTCGTTC	TCAGCAGATTTAAATTTTCC	TGAGATTTTCGTTCTCGTTC	TCAGCAGATTTAAATTTTCC
mag1_10-2	BY4741	mag1Δ/mag1Δ	a/α	2n	II	496620	492906	SNP	1	G	T	2	T/G	53.8/46.3	43/37	80	T	53.75	43	G	46.25	37	CAGATTTAAATTTTCCAGTA	TTTTGATTCTTTGGATTGTG	CAGATTTAAATTTTCCAGTA	TTTTGATTCTTTGGATTGTG
mag1_10-2	BY4741	mag1Δ/mag1Δ	a/α	2n	II	497982	494268	SNP	1	A	G	1	G	62.5	45	72	G	62.5	45				CAAGTCATATATTAACAGGA	ATGTCCATTTTAAAGAGGAG	CAAGTCATATATTAACAGGA	ATGTCCATTTTAAAGAGGAG
mag1_10-2	BY4741	mag1Δ/mag1Δ	a/α	2n	II	522655	518941	SNP	1	T	G	2	G/T	53.9/46.1	48/41	89	G	53.9326	48	T	46.0674	41	TCTTGCTTTTTTCCAACTCT	GCATATCAGACAGAATACCT	TCTTGCTTTTTTCCAACTCT	GCATATCAGACAGAATACCT
mag1_10-2	BY4741	mag1Δ/mag1Δ	a/α	2n	II	534471	530757	SNP	1	A	T	2	A/T	54.5/45.5	55/46	101	A	54.4554	55	T	45.5446	46	CATTGTTGGTGCTATAATAA	GGCCACTAATGGCGGTTCTC	CATTGTTGGTGCTATAATAA	GGCCACTAATGGCGGTTCTC
mag1_10-2	BY4741	mag1Δ/mag1Δ	a/α	2n	II	541213	537499	SNP	1	A	C	1	C	57	53	93	C	56.9892	53				TGTCCTTTATATAATATTAC	TTTTTACACACACATTCTTG	TGTCCTTTATATAATATTAC	TTTTTACACACACATTCTTG
mag1_10-2	BY4741	mag1Δ/mag1Δ	a/α	2n	II	558492	554778	SNP	1	A	G	2	G/A	51.2/48.8	43/41	84	G	51.1905	43	A	48.8095	41	TTTGGAAGTCCTTTATAGAG	TAATTGTAGGGGCCTTTTGT	TTTGGAAGTCCTTTATAGAG	TAATTGTAGGGGCCTTTTGT
mag1_10-2	BY4741	mag1Δ/mag1Δ	a/α	2n	II	560267	556553	SNP	1	G	A	2	G/A	51.8/48.2	58/54	112	G	51.7857	58	A	48.2143	54	GAGAAATCTCATTATTGAAG	AATTAAAAGACGATAATATT	GAGAAATCTCATTATTGAAG	AATTAAAAGACGATAATATT
mag1_10-2	BY4741	mag1Δ/mag1Δ	a/α	2n	II	560614	556900	SNP	1	T	A	2	A/T	51.6/48.4	49/46	95	A	51.5789	49	T	48.4211	46	GTTACTCTATGGTATAGAGC	CCGGAGGTATTACTGGGTGG	GTTACTCTATGGTATAGAGC	CCGGAGGTATTACTGGGTGG
mag1_10-2	BY4741	mag1Δ/mag1Δ	a/α	2n	II	562166	558452	SNP	1	G	C	2	C/G	52.0/48.0	51/47	98	C	52.0408	51	G	47.9592	47	AGTGTCAAATGATGTGATGG	CTCTGTTCCAAGGCACCCCT	AGTGTCAAATGATGTGATGG	CTCTGTTCCAAGGCACCCCT
mag1_10-2	BY4741	mag1Δ/mag1Δ	a/α	2n	II	569042	565328	SNP	1	A	G	2	A/G	53.8/46.2	50/43	93	A	53.7634	50	G	46.2366	43	TATTGGCGGAAACGACCAGG	TCCATATATCATCATGAAAT	TATTGGCGGAAACGACCAGG	TCCATATATCATCATGAAAT
mag1_10-2	BY4741	mag1Δ/mag1Δ	a/α	2n	II	569642	565928	SNP	1	A	G	1	G	56.9	58	102	G	56.8627	58				ATGTCCAGATGAAACGAACG	TAATCGCGGTAGTGAGCATT	ATGTCCAGATGAAACGAACG	TAATCGCGGTAGTGAGCATT
mag1_10-2	BY4741	mag1Δ/mag1Δ	a/α	2n	II	574812	571098	SNP	1	T	A	2	T/A	51.4/48.6	54/51	105	T	51.4286	54	A	48.5714	51	ACTGAATACGGATCAATATC	TCAAATTTAAACGGCCTGAC	ACTGAATACGGATCAATATC	TCAAATTTAAACGGCCTGAC
mag1_10-2	BY4741	mag1Δ/mag1Δ	a/α	2n	II	577182	573468	SNP	1	T	A	2	A/T	51.7/48.3	46/43	89	A	51.6854	46	T	48.3146	43	GTAGCATTTCATTCTTGACC	GTTCTACGTCCATGGTTAAA	GTAGCATTTCATTCTTGACC	GTTCTACGTCCATGGTTAAA
mag1_10-2	BY4741	mag1Δ/mag1Δ	a/α	2n	II	612923	609209	SNP	1	T	A	2	T/A	50.6/49.4	42/41	83	T	50.6024	42	A	49.3976	41	GACAACAAACCACCCAACAA	GGAATGTTGTCTTCCAATGG	GACAACAAACCACCCAACAA	GGAATGTTGTCTTCCAATGG
mag1_10-2	BY4741	mag1Δ/mag1Δ	a/α	2n	II	627135	623421	SNP	1	A	G	1	G	61.2	60	98	G	61.2245	60				GAAAATCAGAGGTGATATCA	TGTTTGTCTGATGGGTGATC	GAAAATCAGAGGTGATATCA	TGTTTGTCTGATGGGTGATC
mag1_10-2	BY4741	mag1Δ/mag1Δ	a/α	2n	II	645381	641667	SNP	1	A	G	1	G	98.2	111	113	G	98.2301	111				AAAATCGTTCACTTCTATCG	AAGCTGTGATAATTTGGAAA	AAAATCGTTCACTTCTATCG	AAGCTGTGATAATTTGGAAA
mag1_10-2	BY4741	mag1Δ/mag1Δ	a/α	2n	II	667625	663911	SNP	1	G	C	2	G/C	52.2/47.8	48/44	92	G	52.1739	48	C	47.8261	44	TAAAACACCAATTAACCCAT	GACGTGGAAAAGAGGCATCA	TAAAACACCAATTAACCCAT	GACGTGGAAAAGAGGCATCA
mag1_10-2	BY4741	mag1Δ/mag1Δ	a/α	2n	II	669210	665496	SNP	1	T	A	2	T/A	53.2/46.8	50/44	94	T	53.1915	50	A	46.8085	44	GCTTGATTTTTCTCTGCGAA	ATTCATTAATCAATGAATTC	GCTTGATTTTTCTCTGCGAA	ATTCATTAATCAATGAATTC
mag1_10-2	BY4741	mag1Δ/mag1Δ	a/α	2n	II	679600	675886	SNP	1	C	T	2	T/C	50.9/49.1	56/54	110	T	50.9091	56	C	49.0909	54	TTTGAAATTATACCGTCCAG	GTCAAAAGACCCAGAGCGCC	TTTGAAATTATACCGTCCAG	GTCAAAAGACCCAGAGCGCC
mag1_10-2	BY4741	mag1Δ/mag1Δ	a/α	2n	II	685892	682178	SNP	1	T	A	2	A/T	51.0/48.0	51/48	100	A	51	51	T	48	48	CAACATTCAAAGTACCATCA	GCGCTACATAAGCAATTCTT	CAACATTCAAAGTACCATCA	GCGCTACATAAGCAATTCTT
mag1_10-2	BY4741	mag1Δ/mag1Δ	a/α	2n	II	686651	682937	SNP	1	T	C	2	C/T	50.0/50.0	57/57	114	C	50	57	T	50	57	TTTTTCCTATTTTTCTTTGT	TCTAATCTGGAAGCTTTCTC	TTTTTCCTATTTTTCTTTGT	TCTAATCTGGAAGCTTTCTC
mag1_10-2	BY4741	mag1Δ/mag1Δ	a/α	2n	II	766262	762542	SNP	1	T	C	2	T/C	52.8/47.2	65/58	123	T	52.8455	65	C	47.1545	58	GTCTTTGCTTTGAGACACTG	CTGGAAAGAAATAAGTTCTC	GTCTTTGCTTTGAGACACTG	CTGGAAAGAAATAAGTTCTC
mag1_10-2	BY4741	mag1Δ/mag1Δ	a/α	2n	II	769597	765877	SNP	1	T	C	2	T/C	50.4/49.6	62/61	123	T	50.4065	62	C	49.5935	61	GTACCACGGGCTCTTGTTGA	CTGATTGGCAATTCTACACG	GTACCACGGGCTCTTGTTGA	CTGATTGGCAATTCTACACG
mag1_10-2	BY4741	mag1Δ/mag1Δ	a/α	2n	II	769782	766062	SNP	1	C	A	2	C/A	54.6/45.4	59/49	108	C	54.6296	59	A	45.3704	49	GATTAGGGCACCTTGGGCTT	GGTTTGGTCGTCCTCGCCAA	GATTAGGGCACCTTGGGCTT	GGTTTGGTCGTCCTCGCCAA
mag1_10-2	BY4741	mag1Δ/mag1Δ	a/α	2n	II	774509	770789	SNP	1	T	C	2	T/C	54.3/45.7	63/53	116	T	54.3103	63	C	45.6897	53	AGTTATACTGAATATATTGA	TAGTTCTATTAATTACTATT	AGTTATACTGAATATATTGA	TAGTTCTATTAATTACTATT
mag1_10-2	BY4741	mag1Δ/mag1Δ	a/α	2n	II	792788	789068	SNP	1	A	T	2	A/T	52.3/47.7	57/52	109	A	52.2936	57	T	47.7064	52	CAATTATAAATATAAAAGCA	GATATTTTCGAGATGCTTCC	CAATTATAAATATAAAAGCA	GATATTTTCGAGATGCTTCC
mag1_10-2	BY4741	mag1Δ/mag1Δ	a/α	2n	II	793062	789342	SNP	1	G	T	1	T	57.5	50	87	T	57.4713	50				CTCCTCAGGAATGTTTGAGT	AGACTGAGCAGATATGCCAT	CTCCTCAGGAATGTTTGAGT	AGACTGAGCAGATATGCCAT
mag1_10-2	BY4741	mag1Δ/mag1Δ	a/α	2n	III	109454	102507	SNP	1	A	G	2	G/A	53.3/46.7	48/42	90	G	53.3333	48	A	46.6667	42	GACCAAGAACCCCAAGTTGA	AGTTTCTTTTCTACTTGATG	GACCAAGAACCCCAAGTTGA	AGTTTCTTTTCTACTTGATG
mag1_10-2	BY4741	mag1Δ/mag1Δ	a/α	2n	III	168426	158461	SNP	1	A	G	1	G	94.6	53	56	G	94.6429	53				AGGTATGTCAGTATGACAAT	CGTCATCCTAAACGTTCATA	AGGTATGTCAGTATGACAAT	CGTCATCCTAAACGTTCATA
mag1_10-2	BY4741	mag1Δ/mag1Δ	a/α	2n	III	179956	169991	SNP	1	A	T	1	T	58.8	67	114	T	58.7719	67				ACAAACCTTGGGGAAGTTAA	AAAACTGAGGATTCGAATTT	ACAAACCTTGGGGAAGTTAA	AAAACTGAGGATTCGAATTT
mag1_10-2	BY4741	mag1Δ/mag1Δ	a/α	2n	III	180812	170847	SNP	1	A	T	2	T/A	54.4/45.6	56/47	103	T	54.3689	56	A	45.6311	47	AACCCAAATGATATTCTTCA	GATTTCACCGAATCGTCTAA	AACCCAAATGATATTCTTCA	GATTTCACCGAATCGTCTAA
mag1_10-2	BY4741	mag1Δ/mag1Δ	a/α	2n	III	187050	177085	SNP	1	A	G	2	G/A	54.2/45.8	65/55	120	G	54.1667	65	A	45.8333	55	GTTCTCGGAGACCTCGATCA	TGGATGATTATAGTCCTGAT	GTTCTCGGAGACCTCGATCA	TGGATGATTATAGTCCTGAT
mag1_10-2	BY4741	mag1Δ/mag1Δ	a/α	2n	III	220357	209664	SNP	1	T	C	2	T/C	54.7/45.3	52/43	95	T	54.7368	52	C	45.2632	43	CGATATTGGCGATGATATTT	TTTTTGTTGATATTAAATAC	CGATATTGGCGATGATATTT	TTTTTGTTGATATTAAATAC
mag1_10-2	BY4741	mag1Δ/mag1Δ	a/α	2n	III	244864	234171	SNP	1	T	A	2	T/A	52.4/46.6	54/48	103	T	52.4272	54	A	46.6019	48	AGCAGAATTTTGGAACGCCT	GACTAGAATATTGCTGAACC	AGCAGAATTTTGGAACGCCT	GACTAGAATATTGCTGAACC
mag1_10-2	BY4741	mag1Δ/mag1Δ	a/α	2n	III	250572	239879	SNP	1	T	A	2	T/A	51.8/48.2	58/54	112	T	51.7857	58	A	48.2143	54	AACGCATGATGTGGTCGTTA	ATTCCCTTGGAGGGAAAATC	AACGCATGATGTGGTCGTTA	ATTCCCTTGGAGGGAAAATC
mag1_10-2	BY4741	mag1Δ/mag1Δ	a/α	2n	III	261192	250499	SNP	1	T	C	2	T/C	52.0/48.0	51/47	98	T	52.0408	51	C	47.9592	47	CAATTCTGCTGCCGAAGTCA	CGCTGTGGTAGTAATTGTGG	CAATTCTGCTGCCGAAGTCA	CGCTGTGGTAGTAATTGTGG
mag1_10-2	BY4741	mag1Δ/mag1Δ	a/α	2n	III	262339	251646	SNP	1	T	C	1	C	60	72	120	C	60	72				ATTTTGAAATCGTAATCCTT	TGGTTTTGAAGACGGTAGGT	ATTTTGAAATCGTAATCCTT	TGGTTTTGAAGACGGTAGGT
mag1_10-2	BY4741	mag1Δ/mag1Δ	a/α	2n	III	278512	267819	SNP	1	T	A	2	T/A	54.1/45.9	66/56	122	T	54.0984	66	A	45.9016	56	TAACCAAAACAAAGAACCTT	ACCACCATCATGGGTAAAAA	TAACCAAAACAAAGAACCTT	ACCACCATCATGGGTAAAAA
mag1_10-2	BY4741	mag1Δ/mag1Δ	a/α	2n	III	287600	276907	SNP	1	A	T	2	A/T	54.9/45.1	62/51	113	A	54.8673	62	T	45.1327	51	GAGGACTGCAGCCTTTCCCA	GTTTTACAAGTTGACGTTGA	GAGGACTGCAGCCTTTCCCA	GTTTTACAAGTTGACGTTGA
mag1_10-2	BY4741	mag1Δ/mag1Δ	a/α	2n	III	295194	284501	SNP	1	G	T	2	G/T	50.5/49.5	56/55	111	G	50.4505	56	T	49.5495	55	GAGGAATAATCGTAATATCA	TATATAGAAATATAGATTCC	GAGGAATAATCGTAATATCA	TATATAGAAATATAGATTCC
mag1_10-2	BY4741	mag1Δ/mag1Δ	a/α	2n	III	304749	294056	SNP	1	T	A	1	A	55.4	56	101	A	55.4455	56				TATTTTGATTCGCGACACAG	CGACTAAATACGAGATATTG	TATTTTGATTCGCGACACAG	CGACTAAATACGAGATATTG
mag1_10-2	BY4741	mag1Δ/mag1Δ	a/α	2n	III	307377	296684	SNP	1	A	G	2	A/G	54.1/45.9	60/51	111	A	54.0541	60	G	45.9459	51	CTTAGACAATAAGCTTCTGA	CGAGGGTCCAAATCTAAAAT	CTTAGACAATAAGCTTCTGA	CGAGGGTCCAAATCTAAAAT
mag1_10-2	BY4741	mag1Δ/mag1Δ	a/α	2n	III	309578	298885	SNP	1	T	C	2	C/T	53.9/46.1	55/47	102	C	53.9216	55	T	46.0784	47	GTGTGGTGGTATTACAGTTT	CTCTCCACTACTAAGAAATG	GTGTGGTGGTATTACAGTTT	CTCTCCACTACTAAGAAATG
mag1_10-2	BY4741	mag1Δ/mag1Δ	a/α	2n	IV	21086	19073	SNP	1	A	G	2	A/G	51.6/48.4	49/46	95	A	51.5789	49	G	48.4211	46	GTTTCTACATATAATACGAG	CAGTCAGACAGAACTTTGGG	GTTTCTACATATAATACGAG	CAGTCAGACAGAACTTTGGG
mag1_10-2	BY4741	mag1Δ/mag1Δ	a/α	2n	IV	24595	22582	SNP	1	A	G	2	A/G	51.3/48.7	59/56	115	A	51.3043	59	G	48.6957	56	GTGATTCAAACAGATGACCC	TCATCGAGCCAACAAGTGAG	GTGATTCAAACAGATGACCC	TCATCGAGCCAACAAGTGAG
mag1_10-2	BY4741	mag1Δ/mag1Δ	a/α	2n	IV	49970	47957	SNP	1	A	C	2	C/A	52.7/47.3	58/52	110	C	52.7273	58	A	47.2727	52	AGAACTACGTGCAACTCTAC	TTAGATCAAAATATAACGGA	AGAACTACGTGCAACTCTAC	TTAGATCAAAATATAACGGA
mag1_10-2	BY4741	mag1Δ/mag1Δ	a/α	2n	IV	64425	62412	SNP	1	T	A	2	T/A	52.3/47.7	56/51	107	T	52.3364	56	A	47.6636	51	TTTACAAATTTAAACCTGTT	TTCTCGTCTCTATTCATTTC	TTTACAAATTTAAACCTGTT	TTCTCGTCTCTATTCATTTC
mag1_10-2	BY4741	mag1Δ/mag1Δ	a/α	2n	IV	64465	62452	SNP	1	T	A	2	T/A	54.5/45.5	67/56	123	T	54.4715	67	A	45.5285	56	CTATTAAATTGTTGAAGATA	CCACAAGTGAGTTGTTCAAA	CTATTAAATTGTTGAAGATA	CCACAAGTGAGTTGTTCAAA
mag1_10-2	BY4741	mag1Δ/mag1Δ	a/α	2n	IV	117902	115889	SNP	1	A	C	2	A/C	53.0/47.0	53/47	100	A	53	53	C	47	47	GCATACATCTTTAAATTCAG	GGTTTTGCTGAATTTTAATA	GCATACATCTTTAAATTCAG	GGTTTTGCTGAATTTTAATA
mag1_10-2	BY4741	mag1Δ/mag1Δ	a/α	2n	IV	118047	116034	SNP	1	T	A	2	A/T	52.4/47.6	43/39	82	A	52.439	43	T	47.561	39	AGTTATTGGTTTTTTTTCTC	GTTACGAGGGATATATGATG	AGTTATTGGTTTTTTTTCTC	GTTGCGAGGGATATATGATG
mag1_10-2	BY4741	mag1Δ/mag1Δ	a/α	2n	IV	118051	116038	SNP	1	A	G	2	G/A	51.2/47.6	43/40	84	G	51.1905	43	A	47.619	40	ATTGGTTTTTTTTCTCTGTT	CGAGGGATATATGATGCCTG	ATTGGTTTTTTTTCTCAGTT	CGAGGGATATATGATGCCTG
mag1_10-2	BY4741	mag1Δ/mag1Δ	a/α	2n	IV	144533	142520	SNP	1	T	C	2	T/C	54.2/45.8	58/49	107	T	54.2056	58	C	45.7944	49	TATATGGTTGATAAGAATTG	AGTTTCTGTAATTGGAAGAG	TATATGGTTGATAAGAATTG	AGTTTCTGTAATTGGAAGAG
mag1_10-2	BY4741	mag1Δ/mag1Δ	a/α	2n	IV	178857	176844	SNP	1	A	C	2	C/A	51.1/48.9	47/45	92	C	51.087	47	A	48.913	45	GTCATTGCAGTTAAGGGGTC	TGATAATCAGACTATATTGA	GTCATTGCAGTTAAGGGGTC	TGATAATCAGACTATATTGA
mag1_10-2	BY4741	mag1Δ/mag1Δ	a/α	2n	IV	182737	180724	SNP	1	C	A	2	A/C	53.2/46.8	41/36	77	A	53.2468	41	C	46.7532	36	AAGTTTCTACCAAATATTTT	TTATAGGCTGCAGCACCATC	AAGTTTCTACCAAATATTTT	TTATAGGCTGCAGCACCATC
mag1_10-2	BY4741	mag1Δ/mag1Δ	a/α	2n	IV	187484	185471	SNP	1	A	G	2	A/G	52.3/47.7	57/52	109	A	52.2936	57	G	47.7064	52	GGAAGTACCAATTGCCTGCA	AAAAAGGCTATCCGAATAAT	GGAAGTACCAATTGCCTGCA	AAAAAGGCTATCCGAATAAT
mag1_10-2	BY4741	mag1Δ/mag1Δ	a/α	2n	IV	192061	190048	SNP	1	A	G	2	A/G	50.0/50.0	52/52	104	A	50	52	G	50	52	AGAGCCAGACGGAAACATAC	TCAGTGATTTGGTAAACCAG	AGAGCCAGACGGAAACATAC	TCAGTGATTTGGTAAACCAG
mag1_10-2	BY4741	mag1Δ/mag1Δ	a/α	2n	IV	221857	219844	SNP	1	C	T	2	C/T	52.8/47.2	57/51	108	C	52.7778	57	T	47.2222	51	AGTAAAATATAAGATGAAAA	AGAAAACAAGCGAAATTTCA	AGTAAAATATAAGATGAAAA	AGAAAACAAGCGAAATTTCA
mag1_10-2	BY4741	mag1Δ/mag1Δ	a/α	2n	IV	267642	265629	SNP	1	A	T	2	A/T	50.6/49.4	45/44	89	A	50.5618	45	T	49.4382	44	TTGAAAAAAAATACAAGTGA	ATCACAGTTACTTAAAAGTC	TTGAAAAAAAATACAAGTGA	ATCACAGTTACTTAAAAGTC
mag1_10-2	BY4741	mag1Δ/mag1Δ	a/α	2n	IV	281309	279296	SNP	1	T	C	2	C/T	51.9/48.1	40/37	77	C	51.9481	40	T	48.0519	37	TTTCTAATTGCGGCACTCGT	GTAGCATTTTGGCTACTTGT	TTTCTAATTGCGGCACTCGT	GTAGCATTTTGGCTACTTGT
mag1_10-2	BY4741	mag1Δ/mag1Δ	a/α	2n	IV	284788	282775	SNP	1	T	C	2	C/T	50.6/49.4	45/44	89	C	50.5618	45	T	49.4382	44	AACTCAAACTCCTCTTGCGG	ACGTCATCATTATCTCTTAT	AACTCAAACTCCTCTTGCGG	ACGTCATCATTATCTCTTAT
mag1_10-2	BY4741	mag1Δ/mag1Δ	a/α	2n	IV	382767	380756	SNP	1	T	C	2	C/T	50.7/49.3	37/36	73	C	50.6849	37	T	49.3151	36	AGAACTTGAAGTGGCCGAAA	TCCTTGCTGTCTAGAAAGGC	AGAACTTGAAGTGGCCGAAA	TCCTTGCTGTCTAGAAAGGC
mag1_10-2	BY4741	mag1Δ/mag1Δ	a/α	2n	IV	408836	406826	SNP	1	T	A	1	A	62.3	43	69	A	62.3188	43				TTGTCAAATAATTTAGAATA	CAGTATCGTGCGTAAAGCTC	TTGTCAAATAATTTAGAATA	CAGTATCGTGCGTAAAGCTC
mag1_10-2	BY4741	mag1Δ/mag1Δ	a/α	2n	IV	434359	432349	SNP	1	T	G	2	G/T	51.3/48.8	41/39	80	G	51.25	41	T	48.75	39	CTGATTTGTGTTCATTTGAT	GTAAGTTAGAGTATTTCAAG	CTGATTTGTGTTCATTTGAT	GTAAGTTAGAGTATTTCAAG
mag1_10-2	BY4741	mag1Δ/mag1Δ	a/α	2n	IV	496771	494761	SNP	1	T	C	2	C/T	54.7/45.3	47/39	86	C	54.6512	47	T	45.3488	39	TATTTTCCCCTTCTCGCAGT	CTTTTAACTGTTCCATCTGA	TATTTTCCCCTTCTCGCAGT	CTTTTAACTGTTCCATCTGA
mag1_10-2	BY4741	mag1Δ/mag1Δ	a/α	2n	IV	519652	517094	SNP	1	A	G	2	A/G	51.3/48.7	39/37	76	A	51.3158	39	G	48.6842	37	GATTTTTATTCCAACAAGAA	AATACAATCTTCGAAAGTCA	GATTTTTATTCCAACAAGAA	AATACAATCTTCGAAAGTCA
mag1_10-2	BY4741	mag1Δ/mag1Δ	a/α	2n	IV	588822	580241	SNP	1	A	G	2	G/A	51.9/48.1	55/51	106	G	51.8868	55	A	48.1132	51	TTGTAAAGTGCGTTAAACTA	TGATCTAGTTGTCGTATTCT	TTGTAAAGTGCGTTAAACTA	TGATCTAGTTGTCGTATTCT
mag1_10-2	BY4741	mag1Δ/mag1Δ	a/α	2n	IV	588915	580334	SNP	1	T	C	1	C	59.3	48	81	C	59.2593	48				TGTCCTTAGCAACATTGGTG	TCTCAGCAATGATCTTGAAA	TGTCCTTAGCAACATTGGTG	TCTCAGCAATGATCTTGAAA
mag1_10-2	BY4741	mag1Δ/mag1Δ	a/α	2n	IV	596198	587617	SNP	1	A	C	2	A/C	53.4/46.6	62/54	116	A	53.4483	62	C	46.5517	54	AATCAGTGAAAAACTACCTA	GGATGAAATGCCTGATTTTG	AATCAGTGAAAAACTACCTA	GGATGAAATGCCTGATTTTG
mag1_10-2	BY4741	mag1Δ/mag1Δ	a/α	2n	IV	597197	588616	SNP	1	A	T	1	T	55.6	45	81	T	55.5556	45				ATAGCATCACTGAGAGACGG	AAACATATTCCTGAAGAAAC	ATAGCATCACTGAGAGACGG	AAACATATTCCTGAAGAAAC
mag1_10-2	BY4741	mag1Δ/mag1Δ	a/α	2n	IV	655724	643932	SNP	1	T	C	2	T/C	54.1/45.9	40/34	74	T	54.0541	40	C	45.9459	34	TTCAACTCCGCCATTTGATG	CTCAACACTCTTCTGCTTCA	TTCAACTCCGCCATTTGATG	CTCAACACTCTTCTGCTTCA
mag1_10-2	BY4741	mag1Δ/mag1Δ	a/α	2n	IV	656973	645181	SNP	1	T	C	1	C	55.6	40	72	C	55.5556	40				GGTTGAAGAATAGGTTTGGT	TCATCAACGGGGTAAATAAC	GGTTGAAGAATAGGTTTGGT	TCATCAACGGGGTAAATAAC
mag1_10-2	BY4741	mag1Δ/mag1Δ	a/α	2n	IV	663468	651676	SNP	1	T	A	1	A	62.5	50	80	A	62.5	50				CTTGTATCAAAGCACTCGTT	TCAGAGAAGTTGGGAAGTGG	CTTGTATCAAAGCACTCGTT	TCAGAGAAGTTGGGAAGTGG
mag1_10-2	BY4741	mag1Δ/mag1Δ	a/α	2n	IV	674077	662285	SNP	1	T	C	2	T/C	53.5/45.3	46/39	86	T	53.4884	46	C	45.3488	39	AGCGTCAACGTATCGAGGAA	CACTATCGGCAGGCCAGTAC	AGCGTCAACGTATCGAGGAA	CACTATCGGCAGGCCAGTAC
mag1_10-2	BY4741	mag1Δ/mag1Δ	a/α	2n	IV	676385	664593	SNP	1	A	G	2	A/G	54.8/45.2	46/38	84	A	54.7619	46	G	45.2381	38	GAAAATATATGAACTAATAA	AACAAAATCTTTAACTGCAG	GAAAATATATGAACTAATAA	AACAAAATCTTTAACTGCAG
mag1_10-2	BY4741	mag1Δ/mag1Δ	a/α	2n	IV	676736	664944	SNP	1	A	G	2	A/G	51.4/48.6	37/35	72	A	51.3889	37	G	48.6111	35	GAAGGAATATAAACGTCCTG	CATGTACGATAAACTACTAC	GAAGGAATATAAACGTCCTG	CATGTACGATAAACTACTAC
mag1_10-2	BY4741	mag1Δ/mag1Δ	a/α	2n	IV	680872	669080	SNP	1	T	C	2	T/C	54.7/45.3	35/29	64	T	54.6875	35	C	45.3125	29	CATCAGTTTTATCACTTTTA	CGTTTTTAGTTTTTTGCTCA	CATCAGTTTTATCACTTTTA	CGTTTTTAGTTTTTTGCTCA
mag1_10-2	BY4741	mag1Δ/mag1Δ	a/α	2n	IV	685816	674024	SNP	1	C	T	1	T	56.2	41	73	T	56.1644	41				AATGGAGCACAGAATGCGTT	AATTCGATTTATCAGAAGAC	AATGGAGCACAGAATGCGTT	AATTCGATTTATCAGAAGAC
mag1_10-2	BY4741	mag1Δ/mag1Δ	a/α	2n	IV	695037	683247	SNP	1	A	G	2	A/G	50.7/49.3	36/35	71	A	50.7042	36	G	49.2958	35	GGGCATGCCTAAGCAGTTTC	TCGAAAATCGTTAGGAGATT	GGGCATGCCTAAGCAGTTTC	TCGAAAATCGTTAGGAGATT
mag1_10-2	BY4741	mag1Δ/mag1Δ	a/α	2n	IV	696894	685104	SNP	1	A	G	2	A/G	50.0/50.0	34/34	68	A	50	34	G	50	34	AAGGGAGAAGCAAATTGAAG	AGATATAATGAAATTGCATG	AAGGGAGAAGCAAATTGAAG	AGATATAATGAAATTGCATG
mag1_10-2	BY4741	mag1Δ/mag1Δ	a/α	2n	IV	738087	726297	SNP	1	T	C	2	C/T	53.6/46.4	45/39	84	C	53.5714	45	T	46.4286	39	ATGTGAGATCGTCCTTTAAG	TCTTCAGACTCAGGTATCTT	ATGTGAGATCGTCCTTTAAG	TCTTCAGACTCAGGTATCTT
mag1_10-2	BY4741	mag1Δ/mag1Δ	a/α	2n	IV	740212	728422	SNP	1	A	G	1	G	61.9	39	63	G	61.9048	39				GTATGTCGTTTATTAATAAA	CGGTAATCGGACTCTAAATA	GTATGTCGTTTATTAATAAA	CGGTAATCGGACTCTAAATA
mag1_10-2	BY4741	mag1Δ/mag1Δ	a/α	2n	IV	767455	755665	SNP	1	A	C	2	A/C	54.2/45.8	39/33	72	A	54.1667	39	C	45.8333	33	AAATTGTGAGTCTTCCAAGT	TTGCAAGATAAGTTCTCCCT	AAATTGTGAGTCTTCCAAGT	TTGCAAGATAAGTTCTCCCT
mag1_10-2	BY4741	mag1Δ/mag1Δ	a/α	2n	IV	771493	759703	SNP	1	T	C	2	T/C	52.4/47.6	43/39	82	T	52.439	43	C	47.561	39	TGTCTTCATCTTACTTTTTT	TCGAACGAACAAAAAATACA	TGTCTTCATCTTACTTTTTT	TCGAACGAACAAAAAATACA
mag1_10-2	BY4741	mag1Δ/mag1Δ	a/α	2n	IV	778043	766253	SNP	1	C	T	1	T	55.7	44	79	T	55.6962	44				AACTTTGGGCTATGTACTTT	GCATCTGCTTTTAACGCAAT	AACTTTGGGCTATGTACTTT	GCATCTGCTTTTAACGCAAT
mag1_10-2	BY4741	mag1Δ/mag1Δ	a/α	2n	IV	794317	782527	SNP	1	A	T	2	A/T	53.7/46.3	29/25	54	A	53.7037	29	T	46.2963	25	AAGACTATCTGAAATAGTTC	CTCTTCGGTTACTAAGGTAA	AAGACTATCTGAAATAGTTC	CTCTTCGGTTACTAAGGTAA
mag1_10-2	BY4741	mag1Δ/mag1Δ	a/α	2n	IV	813108	801318	SNP	1	T	C	2	C/T	50.7/49.3	35/34	69	C	50.7246	35	T	49.2754	34	ATGTTGTATTGTGCTAAAAC	ATGTACATTTTAGAGAAAAA	ATGTTGTATTGTGCTAAAAC	ATGTACATTTTAGAGAAAAA
mag1_10-2	BY4741	mag1Δ/mag1Δ	a/α	2n	IV	820903	809114	SNP	1	T	C	2	T/C	51.6/48.4	32/30	62	T	51.6129	32	C	48.3871	30	TTGTAGCATTATTACCAATT	TTATACTATGAAGTAAGGTC	TTGTAGCATTATTACCAATT	TTATACTATGAAGTAAGGTC
mag1_10-2	BY4741	mag1Δ/mag1Δ	a/α	2n	IV	821502	809713	SNP	1	A	G	1	G	64.2	43	67	G	64.1791	43				ATGTTCTAGGTACAGCTAAC	GCACTACTTCTTCCATAAAG	ATGTTCTAGGTACAGCTAAC	GCACTACTTCTTCCATAAAG
mag1_10-2	BY4741	mag1Δ/mag1Δ	a/α	2n	IV	827109	815320	SNP	1	T	C	1	C	98.6	68	69	C	98.5507	68				ACTCATGAACGGCGACTTCA	CACAGGTTTCTGACAACGCG	ACTCATGAACGGCGACTTCA	CACAGGTTTCTGACAACGCG
mag1_10-2	BY4741	mag1Δ/mag1Δ	a/α	2n	IV	846562	834773	SNP	1	T	G	2	T/G	52.9/47.1	36/32	68	T	52.9412	36	G	47.0588	32	TGGCTGTTCTACCAATTCTA	GAATATAATTAGCCAACTCA	TGGCTGTTCTACCAATTCTA	GAATATAATTAGCCAACTCA
mag1_10-2	BY4741	mag1Δ/mag1Δ	a/α	2n	IV	850052	838263	SNP	1	A	G	2	G/A	51.8/48.2	43/40	83	G	51.8072	43	A	48.1928	40	AAGAGAACCCATAGAATTCG	CTTAAATGGAAATACGAACT	AAGAGAACCCATAGAATTCG	CTTAAATGGAAATACGAACT
mag1_10-2	BY4741	mag1Δ/mag1Δ	a/α	2n	IV	857385	845596	SNP	1	T	A	1	A	98.8	85	86	A	98.8372	85				CGCAGACTGAGTAACAATCC	GGAACATTTCCTTCATAGCA	CGCAGACTGAGTAACAATCC	GGAACATTTCCTTCATAGCA
mag1_10-2	BY4741	mag1Δ/mag1Δ	a/α	2n	IV	861890	850101	SNP	1	A	T	2	A/T	52.7/47.3	48/43	91	A	52.7473	48	T	47.2527	43	TACATCATCGAACTAAGATT	TAAACAAGAATTTAACAAAG	TACATCATCGAACTAAGATT	TAAACAAGAATTTAACAAAG
mag1_10-2	BY4741	mag1Δ/mag1Δ	a/α	2n	IV	930185	917425	SNP	1	A	G	1	G	98.4	63	64	G	98.4375	63				TGAATAAGATAGTGTAGGCA	CCTTCAAAAAGAAAGTGATC	TGAATAAGATAGTGTAGGCA	CCTTCAAAAAGAAAGTGATC
mag1_10-2	BY4741	mag1Δ/mag1Δ	a/α	2n	IV	934139	921379	SNP	1	C	T	2	T/C	53.2/46.8	41/36	77	T	53.2468	41	C	46.7532	36	GATGAATTATTGAAGAAACT	AAGATAGACATCAATTACAG	GATGAATTATTGAAGAAACT	AAGATAGACATCAATTACAG
mag1_10-2	BY4741	mag1Δ/mag1Δ	a/α	2n	IV	936705	923945	SNP	1	C	T	1	T	56.5	35	62	T	56.4516	35				CTTTGGTCAAACCAGTTCAT	ACTTGGTGAAAATTGATAAG	CTTTGGTCAAACCAGTTCAT	ACTTGGTGAAAATTGATAAG
mag1_10-2	BY4741	mag1Δ/mag1Δ	a/α	2n	IV	942857	930097	SNP	1	T	C	2	C/T	52.9/47.1	45/40	85	C	52.9412	45	T	47.0588	40	CTATGTTGATTGTGGGTGGA	GAGATTGCAATACTATCCCG	CTATGTTGATTGTGGGTGGA	GAGATTGCAATACTATCCCG
mag1_10-2	BY4741	mag1Δ/mag1Δ	a/α	2n	IV	952530	939770	SNP	1	A	T	2	A/T	52.3/47.7	45/41	86	A	52.3256	45	T	47.6744	41	AGCAAGATTTCAACCTTGGA	AACATGCATTCAAAGGTCAT	AGCAAGATTTCAACCTTGGA	AACATGCATTCAAAGGTCAT
mag1_10-2	BY4741	mag1Δ/mag1Δ	a/α	2n	IV	960104	947344	SNP	1	C	T	2	T/C	51.4/47.3	38/35	74	T	51.3514	38	C	47.2973	35	CATCATGTTTTTGTCCCATT	ACGTAGCACTGGCGATTTGC	CATCATGTTTTTGTCCCATT	ACGTAGCACTGGCGATTTGC
mag1_10-2	BY4741	mag1Δ/mag1Δ	a/α	2n	IV	961423	948663	SNP	1	A	C	2	A/C	51.9/48.1	40/37	77	A	51.9481	40	C	48.0519	37	GGTATAGCCATGAACAATCC	AATTTTCAAAATGAACAGAC	GGTATAGCCATGAACAATCC	AATTTTCAAAATGAACAGAC
mag1_10-2	BY4741	mag1Δ/mag1Δ	a/α	2n	IV	963560	950800	SNP	1	A	T	2	T/A	52.7/47.3	39/35	74	T	52.7027	39	A	47.2973	35	GTTACAAGCTGAACTTCATA	ACTGCATCCAATGACCATTG	GTTACAAGCTGAACTTCATA	ACTGCATCCAATGACCATTG
mag1_10-2	BY4741	mag1Δ/mag1Δ	a/α	2n	IV	996518	979906	SNP	1	G	T	2	G/T	53.0/47.0	35/31	66	G	53.0303	35	T	46.9697	31	AAAACATTGAATTCTGTATT	GTCATTCCTTTACATATTTG	AAAACATTGAATTCTGTATT	GTCATTCCTTTACATATTTG
mag1_10-2	BY4741	mag1Δ/mag1Δ	a/α	2n	IV	1083940	1067328	SNP	1	T	C	1	C	96.5	82	85	C	96.4706	82				TTAATGAGTTAAACAAATCC	GCACAGAATCAGTGAGGGAA	TTAATGAGTTAAACAAATCC	GCACAGAATCAGTGAGGGAA
mag1_10-2	BY4741	mag1Δ/mag1Δ	a/α	2n	IV	1109145	1087892	SNP	1	A	G	2	G/A	53.8/46.2	42/36	78	G	53.8462	42	A	46.1538	36	GATACGCTATCTGAAACTGC	TTCTTTATTGAAAGTACTAT	GATACGCTATCTGAAACTGC	TTCTTTATTGAAAGTACTAT
mag1_10-2	BY4741	mag1Δ/mag1Δ	a/α	2n	IV	1111754	1090501	SNP	1	A	T	2	A/T	53.2/46.8	50/44	94	A	53.1915	50	T	46.8085	44	TAACGTGTCATTGTTAATAA	GCTTGATGCAAATAATATAA	TAACGTGTCATTGTTAATAA	GCTTGATGCAAATAATATAA
mag1_10-2	BY4741	mag1Δ/mag1Δ	a/α	2n	IV	1128680	1107427	SNP	1	A	G	2	G/A	51.8/48.2	43/40	83	G	51.8072	43	A	48.1928	40	AAAAACTATAATCAAAGAGA	CTTCGTTTTCCTACAGTATC	AAAAACTATAATCAAAGAGA	CTTCGTTTTCCTACAGTATC
mag1_10-2	BY4741	mag1Δ/mag1Δ	a/α	2n	IV	1203300	1181221	SNP	1	T	A	1	A	98.4	63	64	A	98.4375	63				AAGAAATAAACTTCGAACCA	CGGGAAAATACTTGAGAGCC	AAGAAATAAACTTCGAACCA	CGGGAAAATACTTGAGAGCC
mag1_10-2	BY4741	mag1Δ/mag1Δ	a/α	2n	IV	1218950	1193954	SNP	1	T	C	2	C/T	50.0/50.0	38/38	76	C	50	38	T	50	38	GACGTCTCTTTCTATAATTG	CTCTCTGTTGTGAAGGCTTC	GACGTCTCTTTCTATAATTG	CTCTCTGTTGTGAAGGCTTC
mag1_10-2	BY4741	mag1Δ/mag1Δ	a/α	2n	IV	1245434	1220425	SNP	1	T	C	2	T/C	52.8/47.2	38/34	72	T	52.7778	38	C	47.2222	34	TTCTTGGTCGAAATTCAATG	CCAGAACAAGCCGTCGGTGG	TTCTTGGTCGAAATTCAATG	CCAGAACAAGCCGTCGGTGG
mag1_10-2	BY4741	mag1Δ/mag1Δ	a/α	2n	IV	1263526	1238517	SNP	1	A	G	1	G	96.5	83	86	G	96.5116	83				TTATTTGAAGAATAAGATTC	CAGATCATGGGATACTAAGA	TTATTTGAAGAATAAGATTC	CAGATCATGGGATACTAAGA
mag1_10-2	BY4741	mag1Δ/mag1Δ	a/α	2n	IV	1276516	1251507	SNP	1	T	A	1	A	97.1	67	69	A	97.1014	67				ATGATATTTTGAATTTCAAT	GACGTAATTAATGATACTAT	ATGATATTTTGAATTTCAAT	GACGTAATTAATGATACTAT
mag1_10-2	BY4741	mag1Δ/mag1Δ	a/α	2n	IV	1322131	1297121	SNP	1	A	T	1	T	97.5	78	80	T	97.5	78				AACAAATAAAAGCTAGACCT	GATTGAAGAAACTATTAAGT	AACAAATAAAAGCTAGACCT	GATTGAAGAAACTATTAAGT
mag1_10-2	BY4741	mag1Δ/mag1Δ	a/α	2n	IV	1327916	1302906	SNP	1	T	A	2	T/A	52.6/47.4	51/46	97	T	52.5773	51	A	47.4227	46	TTTGATATTTGACCTTTCAT	TCGTTATAGACAACACCTTT	TTTGATATTTGACCTTTCAT	TCGTTATAGACAACACCTTT
mag1_10-2	BY4741	mag1Δ/mag1Δ	a/α	2n	IV	1328023	1303013	SNP	1	G	T	2	G/T	52.5/47.5	52/47	99	G	52.5253	52	T	47.4747	47	ATCTTCTTGTTTAAGTAGCG	ATTCAAGGTGGAGTCTAAAT	ATCTTCTTGTTTAAGTAGCG	ATTCAAGGTGGAGTCTAAAT
mag1_10-2	BY4741	mag1Δ/mag1Δ	a/α	2n	IV	1335914	1310904	SNP	1	G	A	2	G/A	52.0/48.0	52/48	100	G	52	52	A	48	48	TTCCCCACCATCTCCCACAG	TGATTTCGTACACGGGAGTT	TTCCCCACCATCTCCCACAG	TGATTTCGTACACGGGAGTT
mag1_10-2	BY4741	mag1Δ/mag1Δ	a/α	2n	IV	1351673	1326663	SNP	1	A	T	1	T	97.4	76	78	T	97.4359	76				CACCTTCAAACGAAAATGGT	ACAACGTCGGGGAGATTCCT	CACCTTCAAACGAAAATGGT	ACAACGTCGGGGAGATTCCT
mag1_10-2	BY4741	mag1Δ/mag1Δ	a/α	2n	IV	1364746	1339736	SNP	1	T	G	1	G	100	83	83	G	100	83				TCTAAGGATATTTTCAGGTA	GAGATAGAATATACCTCAGA	TCTAAGGATATTTTCAGGTA	GAGATAGAATATACCTCAGA
mag1_10-2	BY4741	mag1Δ/mag1Δ	a/α	2n	IV	1399381	1374371	SNP	1	A	T	2	T/A	52.1/46.8	49/44	94	T	52.1277	49	A	46.8085	44	CGGTAGGTGGTTCACAAACT	GAAAATACCTGAATACAAAT	CGGTAGGTGGTTCACAAACT	GAAAATACCTGAATACAAAT
mag1_10-2	BY4741	mag1Δ/mag1Δ	a/α	2n	IV	1466301	1441291	SNP	1	G	T	2	G/T	50.5/49.5	48/47	95	G	50.5263	48	T	49.4737	47	AAAGAGTTAAATAGTATAAT	AAATAAGAAATACATGAATG	AAAGAGTTAAATAGTATAAT	AAATAAGAAATACATGAATG
mag1_10-2	BY4741	mag1Δ/mag1Δ	a/α	2n	IV	1483886	1458876	SNP	1	A	G	2	G/A	52.4/47.6	66/60	126	G	52.381	66	A	47.619	60	TCTTCGGAGCACTGTTTTCC	TCTTCTTTGAACTTCCTTGA	TCTTCGGAGCACTGTTTTCC	TCTTCTTTGAACTTCCTTGA
mag1_10-2	BY4741	mag1Δ/mag1Δ	a/α	2n	V	2525	2524	SNP	1	T	C	2	C/T	50.5/49.5	54/53	107	C	50.4673	54	T	49.5327	53	AATTCCTTCAGTCACTAATT	CGTTCCGATGAGAACTCGCA	AATTCCTTCAGTCACTAATT	CGTTCCGATGAGAACTCGCA
mag1_10-2	BY4741	mag1Δ/mag1Δ	a/α	2n	V	11446	11445	SNP	1	T	A	2	T/A	51.6/48.4	64/60	124	T	51.6129	64	A	48.3871	60	TTTTTTTTGTTAACCGGAAC	GCCAAGAAGCATTCAGTAAA	TTTTTTTTGTTAACCGGAAC	GCCAAGAAGCATTCAGTAAA
mag1_10-2	BY4741	mag1Δ/mag1Δ	a/α	2n	V	25900	25899	SNP	1	T	A	2	A/T	54.2/45.8	77/65	142	A	54.2254	77	T	45.7746	65	CGATGTATTATGCGTAAAAT	GTTATAATTGTCTGTTGTAT	CGATGTATTATGCGTAAAAT	GTTATAATTGTCTGTTGTAT
mag1_10-2	BY4741	mag1Δ/mag1Δ	a/α	2n	V	32897	32896	SNP	1	T	A	2	A/T	52.3/47.7	45/41	86	A	52.3256	45	T	47.6744	41	TACGTCCAAAATTGAATGAC	TGGCCAACTACACTAAGTTC	TACGTCCAAAATTGAATGAC	TGGCCAACTACACTAAGTTC
mag1_10-2	BY4741	mag1Δ/mag1Δ	a/α	2n	V	38282	38281	SNP	1	G	A	2	G/A	50.9/49.1	54/52	106	G	50.9434	54	A	49.0566	52	GGCCGCTTTTATCTACGAGT	CGTTTATGACCCTGCCCAGC	GGCCGCTTTTATCTACGAGT	CGTTTATGACCCTGCCCAGC
mag1_10-2	BY4741	mag1Δ/mag1Δ	a/α	2n	V	68945	68943	SNP	1	G	A	2	G/A	50.4/49.6	62/61	123	G	50.4065	62	A	49.5935	61	GATAGACGAGAAGGACACAT	GAGGATTTGACAGGCAAGCT	GATAGACGAGAAGGACACAT	GAGGATTTGACAGGCAAGCT
mag1_10-2	BY4741	mag1Δ/mag1Δ	a/α	2n	V	74616	74614	SNP	1	C	G	2	C/G	52.7/47.3	68/61	129	C	52.7132	68	G	47.2868	61	TTTGGTGATGAAAATTACAC	TTGTACCAATTTTCTCATCT	TTTGGTGATGAAAATTACAC	TTGTACCAATTTTCTCATCT
mag1_10-2	BY4741	mag1Δ/mag1Δ	a/α	2n	V	226745	225646	SNP	1	T	C	1	C	56	56	100	C	56	56				GATTCCATTGATAATGGACG	TGAAGTTTACCGTCCATCCT	GATTCCATTGATAATGGACG	TGAAGTTTACCGTCCATCCT
mag1_10-2	BY4741	mag1Δ/mag1Δ	a/α	2n	V	237818	236719	SNP	1	T	C	2	C/T	50.0/50.0	37/37	74	C	50	37	T	50	37	AAAGGTCCAAGTACCGAAAG	TCTTGCACTCAAATGGGTTG	AAAGGTCCAAGTACCGAAAG	TCTTGCACTCAAATGGGTTG
mag1_10-2	BY4741	mag1Δ/mag1Δ	a/α	2n	V	247270	246171	SNP	1	T	A	1	A	61	47	77	A	61.039	47				GTGGACTCAAATTTGGCACG	TCATATTGGTCTAGTTCGTC	GTGGACTCAAATTTGGCACG	TCATATTGGTCTAGTTCGTC
mag1_10-2	BY4741	mag1Δ/mag1Δ	a/α	2n	V	262843	261744	SNP	1	T	C	1	C	56.4	53	94	C	56.383	53				GCCTTTTGGCGCAACTGTCG	CAAGTCATCATCTATGGATG	GCCTTTTGGCGCAACTGTCG	CAAGTCATCATCTATGGATG
mag1_10-2	BY4741	mag1Δ/mag1Δ	a/α	2n	V	323027	321927	SNP	1	A	G	2	G/A	53.1/46.9	51/45	96	G	53.125	51	A	46.875	45	TCAAAGACTAGATTAACTTC	AATGTCTTACAACATGCGAA	TCAAAGACTAGATTAACTTC	AATGTCTTACAACATGCGAA
mag1_10-2	BY4741	mag1Δ/mag1Δ	a/α	2n	V	386800	385700	SNP	1	T	A	1	A	57.5	61	106	A	57.5472	61				TAACCATGGACAACGTGAAT	GGGTAGCATCTTTTTTTTAA	TAACCATGGACAACGTGAAT	GGGTAGCATCTTTTTTTTAA
mag1_10-2	BY4741	mag1Δ/mag1Δ	a/α	2n	V	389769	388669	SNP	1	T	A	2	T/A	54.7/45.3	52/43	95	T	54.7368	52	A	45.2632	43	TTAGAGATAAATGAAGCGGT	TTTTATGCATAGTAGGAGGA	TTAGAGATAAATGAAGCGGT	TTTTATGCATAGTAGGAGGA
mag1_10-2	BY4741	mag1Δ/mag1Δ	a/α	2n	V	406950	405850	SNP	1	T	C	2	C/T	50.6/49.4	41/40	81	C	50.6173	41	T	49.3827	40	TGAATGCATATCGTGAAGAT	TTGATATTAAATTAAGAAGC	TGAATGCATATCGTGAAGAT	TTGATATTAAATTAAGAAGC
mag1_10-2	BY4741	mag1Δ/mag1Δ	a/α	2n	V	408114	407014	SNP	1	T	C	2	C/T	51.7/48.3	75/70	145	C	51.7241	75	T	48.2759	70	ATACGCAATCCAAACTTGTG	TCTTTCTTTGCAAATGGTCT	ATACGCAATCCAAACTTGTG	TCTTTCTTTGCAAATGGTCT
mag1_10-2	BY4741	mag1Δ/mag1Δ	a/α	2n	V	450407	444488	SNP	1	T	A	1	A	100	54	54	A	100	54				AAAGTTATAAAAGCGCTACA	TGTAGAAAATTGAGAACCAC	AAAGTTATAAAAGCGCTACA	TGTAGAAAATTGAGAACCAC
mag1_10-2	BY4741	mag1Δ/mag1Δ	a/α	2n	V	473060	466986	SNP	1	T	A	1	A	72.1	31	43	A	72.093	31				TCTCACCCACGATCATGGAG	TCAGTTGTGAGGGAGTTCCG	TCTCACCCACGATCATGGAG	TCAGTTGTGAGGGAGTTCCG
mag1_10-2	BY4741	mag1Δ/mag1Δ	a/α	2n	V	480495	474421	SNP	1	T	A	1	A	97.1	68	70	A	97.1429	68				TAATTTTCTTTTCCAAGTAC	TGAATTTCGTATCAGATGGT	TAATTTTCTTTTCCAAGTAC	TGAATTTCGTATCAGATGGT
mag1_10-2	BY4741	mag1Δ/mag1Δ	a/α	2n	V	551176	541730	SNP	1	T	C	1	C	94.1	48	51	C	94.1176	48				CTAGTCAACAACTTCGCAGA	CTACAAACTGGTCCTTAAGA	CTAGTCAACAACTTCGCAGA	CTACAAACTGGTCCTTAAGA
mag1_10-2	BY4741	mag1Δ/mag1Δ	a/α	2n	VI	11876	11626	SNP	1	A	G	2	A/G	50.0/50.0	27/27	54	A	50	27	G	50	27	AGGCGGAGATCCAGCAGTAT	AAGAGAATTTGAAGACCGAA	AGGCGGAGATCCAGCAGTAT	AAGAGAATTTGAAGACCGAA
mag1_10-2	BY4741	mag1Δ/mag1Δ	a/α	2n	VI	95477	95227	SNP	1	A	T	1	T	56.1	32	57	T	56.1404	32				AATATTTTTTTTTTTTTGAA	AACCTACCCTATTTCATTAT	AATATTTTTTTTTTTTTGAA	AACCTACCCTATTTCATTAT
mag1_10-2	BY4741	mag1Δ/mag1Δ	a/α	2n	VI	150373	145560	SNP	1	A	G	2	G/A	54.1/45.9	53/45	98	G	54.0816	53	A	45.9184	45	TAAGAACTAAAAAGGAAGAA	ACATTTTGATGTCTATCGAA	TAAGAACTAAAAAGGAAGAA	ACATTTTGATGTCTATCGAA
mag1_10-2	BY4741	mag1Δ/mag1Δ	a/α	2n	VI	253726	248913	SNP	1	T	C	2	T/C	53.5/46.5	54/47	101	T	53.4653	54	C	46.5347	47	ATCTTTGCTTGCGTCACCAG	CCATCCATAGATATCTCTCA	ATCTTTGCTTGCGTCACCAG	CCATCCATAGATATCTCTCA
mag1_10-2	BY4741	mag1Δ/mag1Δ	a/α	2n	VII	11	12	SNP	1	A	C	1	C	75.9	22	29	C	75.8621	22				CCACACCCAC	CACACCACACCCACACCCAC	CCACACCCACC	CACACCACACCCACACCCAC
mag1_10-2	BY4741	mag1Δ/mag1Δ	a/α	2n	VII	2626	2628	SNP	1	T	C	2	T/C	54.4/45.6	68/57	125	T	54.4	68	C	45.6	57	CAAATATCAGACACGCTTTG	CTATTTCTATCATATAGCGA	CAAATATCAGACACGCTTTG	CTATTTCTATCATATAGCGA
mag1_10-2	BY4741	mag1Δ/mag1Δ	a/α	2n	VII	4443	4445	SNP	1	T	C	1	C	57.8	74	128	C	57.8125	74				GTTAATATTTCAAAATAATG	CCGTAATAATTATTACCGAC	GTTAATATTTCAAAATAATG	CCGTAATAATTATTACCGAC
mag1_10-2	BY4741	mag1Δ/mag1Δ	a/α	2n	VII	13645	13648	SNP	1	T	C	1	C	59	59	100	C	59	59				ACTATGCCTTTCGAACCACT	TGAGTCACAGTGTGCAACCA	ACTATGCCTTTCGAACCACT	TGAGTCACAGTGTGCAACCA
mag1_10-2	BY4741	mag1Δ/mag1Δ	a/α	2n	VII	15256	15259	SNP	1	A	G	1	G	99.1	111	112	G	99.1071	111				CATCAAAAACAAGGATTACA	AAAGGCTTTGATCGTTACTG	CATCAAAAACAAGGATTACA	AAAGGCTTTGATCGTTACTG
mag1_10-2	BY4741	mag1Δ/mag1Δ	a/α	2n	VII	15657	15660	SNP	1	A	G	1	G	97.6	124	127	G	97.6378	124				TCAAGATGGCTATCATTGAC	ACAACGTCACTCCAGCTGTT	TCAAGATGGCTATCATTGAC	ACAACGTCACTCCAGCTGTT
mag1_10-2	BY4741	mag1Δ/mag1Δ	a/α	2n	VII	43842	43845	SNP	1	A	T	1	T	96	97	101	T	96.0396	97				TGATTTCATCAAAATAGAAG	TAGCGACGAATTTCAATACG	TGATTTCATCAAAATAGAAG	TAGCGACGAATTTCAATACG
mag1_10-2	BY4741	mag1Δ/mag1Δ	a/α	2n	VII	56910	56913	SNP	1	T	C	1	C	97.9	95	97	C	97.9381	95				ATTTCATTCTTGCAAGCTCA	ACTGACAAAGCTTTTGTCAT	ATTTCATTCTTGCAAGCTCA	ACTGACAAAGCTTTTGTCAT
mag1_10-2	BY4741	mag1Δ/mag1Δ	a/α	2n	VII	65528	65531	SNP	1	T	C	1	C	99	96	97	C	98.9691	96				TAGTGAGTTTTGATCAAGAG	GTCCCTGCATTTATCTCTGG	TAGTGAGTTTTGATCAAGAG	GTCCCTGCATTTATCTCTGG
mag1_10-2	BY4741	mag1Δ/mag1Δ	a/α	2n	VII	72215	72218	SNP	1	A	G	1	G	99.2	125	126	G	99.2063	125				ATGAATTTATCTACGATACT	AAATTCCACAATCTTTGAGG	ATGAATTTATCTACGATACT	AAATTCCACAATCTTTGAGG
mag1_10-2	BY4741	mag1Δ/mag1Δ	a/α	2n	VII	73836	73839	SNP	1	G	A	1	A	98.9	93	94	A	98.9362	93				TTCAAAAAAATAATGATTTC	CCCAGGATCGAACTGGGGAC	TTCAAAAAAATAATGATTTC	CCCAGGATCGAACTGGGGAC
mag1_10-2	BY4741	mag1Δ/mag1Δ	a/α	2n	VII	93510	93513	SNP	1	A	G	2	A/G	49.6/49.6	60/60	121	A	49.5868	60	G	49.5868	60	GAAGGACTGGAGAAAAGTAG	GCCCAAGTGGCAATCGAGAA	GAAGGACTGGAGAAAAGTAG	GCCCAAGTGGCAATCGAGAA
mag1_10-2	BY4741	mag1Δ/mag1Δ	a/α	2n	VII	100044	100047	SNP	1	A	G	2	A/G	50.0/50.0	45/45	90	A	50	45	G	50	45	CAAACCTGAACTAGTGCCCA	TTTCACCAAAAACATTGGTT	CAAACCTGAACTAGTGCCCA	TTTCACCAAAAACATTGGTT
mag1_10-2	BY4741	mag1Δ/mag1Δ	a/α	2n	VII	117598	117601	SNP	1	A	G	2	A/G	53.0/47.0	53/47	100	A	53	53	G	47	47	GAAGAATATATATAAGGTGA	AAAAGGACGTACGTATTTTT	GAAGAATATATATAAGGTGA	AAAAGGACGTACGTATTTTT
mag1_10-2	BY4741	mag1Δ/mag1Δ	a/α	2n	VII	127475	127478	SNP	1	A	C	2	A/C	53.0/47.0	61/54	115	A	53.0435	61	C	46.9565	54	ACACCGGAAACGGAAAACGC	TTCTCTGCAACACCAAGAGC	ACACCGGAAACGGAAAACGC	TTCTCTGCAACACCAAGAGC
mag1_10-2	BY4741	mag1Δ/mag1Δ	a/α	2n	VII	127856	127859	SNP	1	A	C	2	A/C	53.6/46.4	60/52	112	A	53.5714	60	C	46.4286	52	GCCAAGATTTATGAAATACC	TTACTGTATAAATTGATCCT	GCCAAGATTTATGAAATACC	TTACTGTATAAATTGATCCT
mag1_10-2	BY4741	mag1Δ/mag1Δ	a/α	2n	VII	144453	144456	SNP	1	T	A	2	T/A	54.0/46.0	47/40	87	T	54.023	47	A	45.977	40	GAAGAACGACTATTATTTGC	AATACAGAGTAAGCTATCCT	GAAGAACGACTATTATTTGC	AATACAGAGTAAGCTATCCT
mag1_10-2	BY4741	mag1Δ/mag1Δ	a/α	2n	VII	184342	184345	SNP	1	A	G	2	G/A	51.6/48.4	48/45	93	G	51.6129	48	A	48.3871	45	GAGTTAAAATGCTGCTTGTA	TCTGAATTTTTTCTCTGGAA	GAGTTAAAATGCTGCTTGTA	TCTGAATTTTTTCTCTGGAA
mag1_10-2	BY4741	mag1Δ/mag1Δ	a/α	2n	VII	202468	202471	SNP	1	G	T	2	G/T	53.3/46.7	56/49	105	G	53.3333	56	T	46.6667	49	GCATTATTAATCGGTAAATG	AGATATATTAGAGATGATCG	GCATTATTAATCGGTAAATG	AGATATATTAGAGATGATCG
mag1_10-2	BY4741	mag1Δ/mag1Δ	a/α	2n	VII	219696	219699	SNP	1	A	T	2	A/T	51.4/48.6	56/53	109	A	51.3761	56	T	48.6239	53	TGGCTAATCTCATACCATTT	TTGTTAAACAGGTTTTGCTA	TGGCTAATCTCATACCATTT	TTGTTAAACAGGTTTTGCTA
mag1_10-2	BY4741	mag1Δ/mag1Δ	a/α	2n	VII	220221	220224	SNP	1	A	G	2	G/A	53.3/46.7	49/43	92	G	53.2609	49	A	46.7391	43	ACCCGATTAACAAGATAATG	CGAACCAAATTAACTCATTC	ACCCGATTAACAAGATAATG	CGAACCAAATTAACTCATTC
mag1_10-2	BY4741	mag1Δ/mag1Δ	a/α	2n	VII	247910	247913	SNP	1	A	G	2	A/G	54.3/45.7	50/42	92	A	54.3478	50	G	45.6522	42	AAGATCACAGTCTGATGCGC	TAATGGACTGATCAATTCCT	AAGATCACAGTCTGATGCGC	TAATGGACTGATCAATTCCT
mag1_10-2	BY4741	mag1Δ/mag1Δ	a/α	2n	VII	256567	256570	SNP	1	T	G	1	G	57	49	86	G	56.9767	49				AGAATACTCGAATTTCTACA	GAAAAGTAAACCCACCTTAT	AGAATACTCGAATTTCTACA	GAAAAGTAAACCCACCTTAT
mag1_10-2	BY4741	mag1Δ/mag1Δ	a/α	2n	VII	322695	322698	SNP	1	A	C	1	C	58.8	50	85	C	58.8235	50				GGGGTTGAATCAGTTTGGTC	ATGTGGTGTTTCAGAGGATG	GGGGTTGAATCAGTTTGGTC	ATGTGGTGTTTCAGAGGATG
mag1_10-2	BY4741	mag1Δ/mag1Δ	a/α	2n	VII	373594	373597	SNP	1	A	G	2	A/G	54.7/45.3	64/53	117	A	54.7009	64	G	45.2991	53	TAATAGTTCCCAAGAACATA	TGAGTATATTCTACAATATT	TAATAGTTCCCAAGAACATA	TGAGTATATTCTACAATATT
mag1_10-2	BY4741	mag1Δ/mag1Δ	a/α	2n	VII	378123	378126	SNP	1	A	G	1	G	64.3	54	84	G	64.2857	54				TGGTGCCAATTACAAGAAGA	TGACTCTTCTTTTAACCCTT	TGGTGCCAATTACAAGAAGA	TGACTCTTCTTTTAACCCTT
mag1_10-2	BY4741	mag1Δ/mag1Δ	a/α	2n	VII	401600	401603	SNP	1	A	G	2	G/A	52.0/48.0	39/36	75	G	52	39	A	48	36	GCCGTTACACTATATCGGAA	CAAATTAACTGAAAATGTTG	GCCGTTACACTATATCGGAA	CAAATTAACTGAAAATGTTG
mag1_10-2	BY4741	mag1Δ/mag1Δ	a/α	2n	VII	418540	418544	SNP	1	A	G	2	A/G	51.1/48.9	48/46	94	A	51.0638	48	G	48.9362	46	TCCAGGAAAAGAAAAAGCCA	ACATACAACCATATCCAATT	TCCAGGAAAAGAAAAAGCCA	ACATACAACCATATCCAATT
mag1_10-2	BY4741	mag1Δ/mag1Δ	a/α	2n	VII	470245	470249	SNP	1	A	G	2	A/G	52.2/47.8	48/44	92	A	52.1739	48	G	47.8261	44	AGAAATGGTGCTCGTAAAAT	GAACAAATTTTGAAGCCATA	AGAAATGGTGCTCGTAAAAT	GAACAAATTTTGAAGCCATA
mag1_10-2	BY4741	mag1Δ/mag1Δ	a/α	2n	VII	561752	559292	SNP	1	C	A	2	A/C	50.6/49.4	43/42	85	A	50.5882	43	C	49.4118	42	GGCCAAGTTGCCAATGTATA	ATTGCTGTTTCCTGGTTTGA	GGCCAAGTTGCCAATGTATA	ATTGCTGTTTCCTGGTTTGA
mag1_10-2	BY4741	mag1Δ/mag1Δ	a/α	2n	VII	568508	561802	SNP	1	T	C	2	C/T	51.7/48.3	45/42	87	C	51.7241	45	T	48.2759	42	GGCCGATATACTCTTCAGTT	GTCATTCATGATTTATTATA	GGCCGATATACTCTTCAGTT	GTCATTCATGATTTATTATA
mag1_10-2	BY4741	mag1Δ/mag1Δ	a/α	2n	VII	608113	600189	SNP	1	A	T	2	T/A	53.8/46.2	50/43	93	T	53.7634	50	A	46.2366	43	TACGTGGAGGACAATGGTTA	CTATATTGATGAAGAAATAA	TACGTGGAGGACAATGGTTA	CTATATTGATGAAGAAATAA
mag1_10-2	BY4741	mag1Δ/mag1Δ	a/α	2n	VII	619810	611886	SNP	1	T	C	2	C/T	53.3/46.7	49/43	92	C	53.2609	49	T	46.7391	43	CTGATCATCTTCGGGTAGTT	TCTCAAATGTGGGAAGTAGC	CTGATCATCTTCGGGTAGTT	TCTCAAATGTGGGAAGTAGC
mag1_10-2	BY4741	mag1Δ/mag1Δ	a/α	2n	VII	629491	621567	SNP	1	A	G	2	G/A	52.4/47.6	44/40	84	G	52.381	44	A	47.619	40	CCTTTTCTGTCATACATAGC	TCAAGACCATACGCAAAGTA	CCTTTTCTGTCATACATAGC	TCAAGACCATACGCAAAGTA
mag1_10-2	BY4741	mag1Δ/mag1Δ	a/α	2n	VII	652038	644114	SNP	1	T	A	1	A	97.6	83	85	A	97.6471	83				GGAACGTAGCGTTCTTCACC	TTACGTAATCGGAATGAAAC	GGAACGTAGCGTTCTTCACC	TTACGTAATCGGAATGAAAC
mag1_10-2	BY4741	mag1Δ/mag1Δ	a/α	2n	VII	658932	651008	SNP	1	T	C	2	T/C	51.4/48.6	36/34	70	T	51.4286	36	C	48.5714	34	CGTTGTCGTTAACGGATTAG	CCCTTCTTGTTCTTATGATA	CGTTGTCGTTAACGGATTAG	CCCTTCTTGTTCTTATGATA
mag1_10-2	BY4741	mag1Δ/mag1Δ	a/α	2n	VII	663543	655619	SNP	1	T	C	2	C/T	54.8/45.2	51/42	93	C	54.8387	51	T	45.1613	42	GTACTTTTGAATTTACTATC	TGATGGCAGCGTTATTAAAC	GTACTTTTGAATTTACTATC	TGATGGCAGCGTTATTAAAC
mag1_10-2	BY4741	mag1Δ/mag1Δ	a/α	2n	VII	674243	666319	SNP	1	A	T	2	A/T	50.0/48.9	47/46	94	A	50	47	T	48.9362	46	AAATTGACCGGTTCAGTTCC	TTCAAGGAAGTTTTCTGCCA	AAATTGACCGGTTCAGTTCC	TTCAAGGAAGTTTTCTGCCA
mag1_10-2	BY4741	mag1Δ/mag1Δ	a/α	2n	VII	701014	693090	SNP	1	A	T	2	A/T	53.8/46.2	50/43	93	A	53.7634	50	T	46.2366	43	TGCTTAAGCAAATACGCTTA	AAGCCGAACGCTCTACCAAC	TGCTTAAGCAAATACGCTTA	AAGCCGAACGCTCTACCAAC
mag1_10-2	BY4741	mag1Δ/mag1Δ	a/α	2n	VII	706219	698295	SNP	1	C	A	2	C/A	53.5/46.5	38/33	71	C	53.5211	38	A	46.4789	33	ATGACATTTTATTTTTTTCA	AGTTTTTGGCTCTATAGGAT	ATGACATTTTATTTTTTTCA	AGTTTTTGGCTCTATAGGAT
mag1_10-2	BY4741	mag1Δ/mag1Δ	a/α	2n	VII	713028	705104	SNP	1	T	C	1	C	62.7	52	83	C	62.6506	52				ATATGGTAAAAAGGTTAAGA	TCATATTTAAATCTTCATTA	ATATGGTAAAAAGGTTAAGA	TCATATTTAAATCTTCATTA
mag1_10-2	BY4741	mag1Δ/mag1Δ	a/α	2n	VII	720458	712534	SNP	1	T	G	1	G	100	87	87	G	100	87				CCCTAGGGACGAGGAAGAAA	AGTAAATGACAACGATGAAA	CCCTAGGGACGAGGAAGAAA	AGTAAATGACAACGATGAAA
mag1_10-2	BY4741	mag1Δ/mag1Δ	a/α	2n	VII	758288	750364	SNP	1	A	T	2	A/T	50.0/50.0	50/50	100	A	50	50	T	50	50	CCGTCCATATTACTCAATGA	ACGTATAATTTGTTAAAGGA	CCGTCCATATTACTCAATGA	ACGTATAATTTGTTAAAGGA
mag1_10-2	BY4741	mag1Δ/mag1Δ	a/α	2n	VII	758646	750722	SNP	1	A	G	1	G	60.8	45	74	G	60.8108	45				TCGAACTGAACCAAGATGGA	CGCTTGAAATACCCAACGTT	TCGAACTGAACCAAGATGGA	CGCTTGAAATACCCAACGTT
mag1_10-2	BY4741	mag1Δ/mag1Δ	a/α	2n	VII	768537	760613	SNP	1	A	G	2	G/A	50.6/49.4	42/41	83	G	50.6024	42	A	49.3976	41	CCTTGTTTACCCAACTTGGG	TGAAGACACTTTTAGAACAT	CCTTGTTTACCCAACTTGGG	TGAAGACACTTTTAGAACAT
mag1_10-2	BY4741	mag1Δ/mag1Δ	a/α	2n	VII	768791	760867	SNP	1	A	T	1	T	55.2	53	96	T	55.2083	53				AAGGTTTGTCTCAGAATTCA	GGGATTTTCTAGATTTAATG	AAGGTTTGTCTCAGAATTCA	GGGATTTTCTAGATTTAATG
mag1_10-2	BY4741	mag1Δ/mag1Δ	a/α	2n	VII	778097	770173	SNP	1	A	G	1	G	57.8	52	90	G	57.7778	52				GAAATTAAGACGTAGAGATG	AAAACAGCGATGAAATTACT	GAAATTAAGACGTAGAGATG	AAAACAGCGATGAAATTACT
mag1_10-2	BY4741	mag1Δ/mag1Δ	a/α	2n	VII	848240	834390	SNP	1	T	C	1	C	65.8	52	79	C	65.8228	52				TCTAACACCACCTGGTTGCA	CAATTCACCAACAATTCTAT	TCTAACACCACCTGGTTGCA	CAATTCACCAACAATTCTAT
mag1_10-2	BY4741	mag1Δ/mag1Δ	a/α	2n	VII	858087	844237	SNP	1	A	G	2	G/A	52.4/47.6	54/49	103	G	52.4272	54	A	47.5728	49	CTTTCCCCTTTAGTCACATT	CTAGCCAACGCTAATTCTTG	CTTTCCCCTTTAGTCACATT	CTAGCCAACGCTAATTCTTG
mag1_10-2	BY4741	mag1Δ/mag1Δ	a/α	2n	VII	858612	844762	SNP	1	A	G	2	A/G	50.8/48.4	62/59	122	A	50.8197	62	G	48.3607	59	TGGCGAAATCTAAACACACC	TCAGGATCAATTTACTGCGC	TGGCGAAATCTAAACACACC	TCAGGATCAATTTACTGCGC
mag1_10-2	BY4741	mag1Δ/mag1Δ	a/α	2n	VII	882986	869136	SNP	1	G	A	1	A	56	47	84	A	55.9524	47				GAGGAGACAACAGCGTCTTC	GTGTAACCCAAAACACCCTT	GAGGAGACAACAGCGTCTTC	GTGTAACCCAAAACACCCTT
mag1_10-2	BY4741	mag1Δ/mag1Δ	a/α	2n	VII	910595	896746	SNP	1	A	G	1	G	100	84	84	G	100	84				CCCTTGGTACGAAGAATGTG	CAATATCACCAAAGTCTGTC	CCCTTGGTACGAAGAATGTG	CAATATCACCAAAGTCTGTC
mag1_10-2	BY4741	mag1Δ/mag1Δ	a/α	2n	VII	959974	946125	SNP	1	T	C	1	C	58.3	49	84	C	58.3333	49				GGAACAGCAGGGCACTGTCA	CACGCGTACATTCTACAAAA	GGAACAGCAGGGCACTGTCA	CACGCGTACATTCTACAAAA
mag1_10-2	BY4741	mag1Δ/mag1Δ	a/α	2n	VII	970175	956326	SNP	1	G	C	2	G/C	51.1/48.9	48/46	94	G	51.0638	48	C	48.9362	46	TGCCGTTCTATCAGAGGTTT	AACATTGCCAATGCCTTAAA	TGCCGTTCTATCAGAGGTTT	AACATTGCCAATGCCTTAAA
mag1_10-2	BY4741	mag1Δ/mag1Δ	a/α	2n	VII	971793	957944	SNP	1	T	A	2	A/T	50.0/50.0	42/42	84	A	50	42	T	50	42	ATGCCAGTTTTCGACATCAA	CCATGATAGTTCCTTCACTT	ATGCCAGTTTTCGACATCAA	CCATGATAGTTCCTTCACTT
mag1_10-2	BY4741	mag1Δ/mag1Δ	a/α	2n	VII	974432	960583	SNP	1	A	T	1	T	57.4	62	108	T	57.4074	62				AGGCGAATGTGTGCATGAAT	TTGCCAGTGTGCTCGATATT	AGGCGAATGTGTGCATGAAT	TTGCCAGTGTGCTCGATATT
mag1_10-2	BY4741	mag1Δ/mag1Δ	a/α	2n	VII	1011661	997812	SNP	1	T	C	2	T/C	51.6/48.4	49/46	95	T	51.5789	49	C	48.4211	46	GTTATTATTATTATCACTAT	TAATATTATTATTCGGGTCC	GTTATTATTATTATCACTAT	TAATATTATTATTCGGGTCC
mag1_10-2	BY4741	mag1Δ/mag1Δ	a/α	2n	VII	1041244	1027395	SNP	1	T	C	2	T/C	52.8/47.2	57/51	108	T	52.7778	57	C	47.2222	51	GAAAACGGGTGCTCTAATCA	GTTATTGTATAATGTGGGGA	GAAAACGGGTGCTCTAATCA	GTTATTGTATAATGTGGGGA
mag1_10-2	BY4741	mag1Δ/mag1Δ	a/α	2n	VII	1044228	1030379	SNP	1	T	C	2	C/T	54.6/45.4	65/54	119	C	54.6218	65	T	45.3782	54	GGATTAACTGGCCCTTAGAA	CGTCCTCAGTATGATTTTTA	GGATTAACTGGCCCTTAGAA	CGTCCTCAGTATGATTTTTA
mag1_10-2	BY4741	mag1Δ/mag1Δ	a/α	2n	VII	1064057	1050208	SNP	1	T	C	2	C/T	51.5/48.5	51/48	99	C	51.5152	51	T	48.4848	48	CAATGGTTCTCAAAATTTCG	CGAATTGCAACTTTTTACTC	CAATGGTTCTCAAAATTTCG	CGAATTGCAACTTTTTACTC
mag1_10-2	BY4741	mag1Δ/mag1Δ	a/α	2n	VII	1064404	1050555	SNP	1	T	A	1	A	56.3	45	80	A	56.25	45				TGATCTTGATCAACCATACC	AAAGTAACACACGTTTCTAG	TGATCTTGATCAACCATACC	AAAGTAACACACGTTTCTAG
mag1_10-2	BY4741	mag1Δ/mag1Δ	a/α	2n	VIII	4680	4683	SNP	1	T	C	2	C/T	50.7/49.3	36/35	71	C	50.7042	36	T	49.2958	35	GTAATAATTAAGCTACTCTA	TGAGAAGAAGCAGAATCTGC	GTAATAATTAAGCTACTCTA	TGAGAAGAAGCAGAATCTGC
mag1_10-2	BY4741	mag1Δ/mag1Δ	a/α	2n	VIII	17377	17380	SNP	1	G	A	2	G/A	54.2/45.8	64/54	118	G	54.2373	64	A	45.7627	54	ATAATTTATTTCTACAAGTA	AGGGGCGCAGTAGAATGCAT	ATAATTTATTTCTACAAGTA	AGGGGCGCAGTAGAATGCAT
mag1_10-2	BY4741	mag1Δ/mag1Δ	a/α	2n	VIII	25757	25761	SNP	1	C	T	2	C/T	51.9/48.1	67/62	129	C	51.938	67	T	48.062	62	CGAACTATCAACACATTTGA	TATCATTTTGGCAAATTCAC	CGAACTATCAACACATTTGA	TATCATTTTGGCAAATTCAC
mag1_10-2	BY4741	mag1Δ/mag1Δ	a/α	2n	VIII	30784	30788	SNP	1	G	C	2	C/G	53.1/46.9	60/53	113	C	53.0973	60	G	46.9027	53	CAATTTTATTTTTGTCTGGA	ATATGGTTAGTTGATTATAT	CAATTTTATTTTTGTCTGGA	ATATGGTTAGTTGATTATAT
mag1_10-2	BY4741	mag1Δ/mag1Δ	a/α	2n	VIII	35194	35198	SNP	1	T	C	2	C/T	53.4/46.6	71/62	133	C	53.3835	71	T	46.6165	62	GTCATTATTATATTAAAACG	TTGAAAATTAATATTATTAT	GTCATTATTATATTAAAACG	TTGAAAATTAATATTATTAT
mag1_10-2	BY4741	mag1Δ/mag1Δ	a/α	2n	VIII	37598	37602	SNP	1	G	T	2	G/T	51.2/48.8	62/59	121	G	51.2397	62	T	48.7603	59	TGGAAGCGTTGGTTACGTCA	AAACGAACGCCTTTTGTTTA	TGGAAGCGTTGGTTACGTCA	AAACGAACGCCTTTTGTTTA
mag1_10-2	BY4741	mag1Δ/mag1Δ	a/α	2n	VIII	101956	100014	SNP	1	T	A	1	A	99.2	122	123	A	99.187	122				GTCTAATATACCTTGCCACT	TAGATAGACAAGCAGTCAGA	GTCTAATATACCTTGCCACT	TAGATAGACAAGCAGTCAGA
mag1_10-2	BY4741	mag1Δ/mag1Δ	a/α	2n	VIII	116248	114306	SNP	1	T	C	2	C/T	51.4/48.6	54/51	105	C	51.4286	54	T	48.5714	51	GTTTTAAAATATTACCTTCG	GTCGTTATCGTTACTGAGGA	GTTTTAAAATATTACCTTCG	GTCGTTATCGTTACTGAGGA
mag1_10-2	BY4741	mag1Δ/mag1Δ	a/α	2n	VIII	130842	128900	SNP	1	C	G	2	C/G	51.7/48.3	62/58	120	C	51.6667	62	G	48.3333	58	AACGGCGATGGGTGAAGTTG	TTATCTGCAACTCCTCTAAT	AACGGCGATGGGTGAAGTTG	TTATCTGCAACTCCTCTAAT
mag1_10-2	BY4741	mag1Δ/mag1Δ	a/α	2n	VIII	151863	149921	SNP	1	A	T	1	T	55.5	61	110	T	55.4545	61				CAGGTACGAATATCCGATGT	TTTCCAGTTAACCCATCGAC	CAGGTACGAATATCCGATGT	TTTCCAGTTAACCCATCGAC
mag1_10-2	BY4741	mag1Δ/mag1Δ	a/α	2n	VIII	156461	154519	SNP	1	C	G	2	C/G	54.8/45.2	46/38	84	C	54.7619	46	G	45.2381	38	AAAGGAAGAATTGAACTGCT	TTTAAAAGCTGAAACAAACT	AAAGGAAGAATTGAACTGCT	TTTAAAAGCTGAAACAAACT
mag1_10-2	BY4741	mag1Δ/mag1Δ	a/α	2n	VIII	175773	173831	SNP	1	A	G	2	G/A	50.6/49.4	41/40	81	G	50.6173	41	A	49.3827	40	AGTTGTCTGAAGTGCAAGCG	TTGCCGCTGTCGGACAAGGC	AGTTGTCTGAAGTGCAAGCG	TTGCCGCTGTCGGACAAGGC
mag1_10-2	BY4741	mag1Δ/mag1Δ	a/α	2n	VIII	218207	215058	SNP	1	T	C	1	C	98.9	88	89	C	98.8764	88				ATTGATATCTATGTATATAG	ATGAAATATTGCATATACTC	ATTGATATCTATGTATATAG	ATGAAATATTGCATATACTC
mag1_10-2	BY4741	mag1Δ/mag1Δ	a/α	2n	VIII	228859	225710	SNP	1	T	A	1	A	99	100	101	A	99.0099	100				CTGTGGATTTGCTTTTTGAT	TCAAAACCTTTTTCTTTTCA	CTGTGGATTTGCTTTTTGAT	TCAAAACCTTTTTCTTTTCA
mag1_10-2	BY4741	mag1Δ/mag1Δ	a/α	2n	VIII	269785	266636	SNP	1	T	A	1	A	100	110	110	A	100	110				TAACTGGAGGAACTTGGTCT	CTGTATTTGTTAAAGTTTTT	TAACTGGAGGAACTTGGTCT	CTGTATTTGTTAAAGTTTTT
mag1_10-2	BY4741	mag1Δ/mag1Δ	a/α	2n	VIII	269891	266742	SNP	1	T	C	1	C	100	90	90	C	100	90				TGCTGTTGTTGTTATTATTG	TGTAATTACGATTCTGTCTG	TGCTGTTGTTGTTATTATTG	TGTAATTACGATTCTGTCTG
mag1_10-2	BY4741	mag1Δ/mag1Δ	a/α	2n	VIII	278866	275717	SNP	1	A	G	2	A/G	50.0/50.0	45/45	90	A	50	45	G	50	45	GGTAGAGCCATAAAAGTAGG	CCCACATCTGGTCAGCAGCA	GGTAGAGCCATAAAAGTAGG	CCCACATCTGGTCAGCAGCA
mag1_10-2	BY4741	mag1Δ/mag1Δ	a/α	2n	VIII	299902	296753	SNP	1	T	C	2	T/C	50.9/49.1	57/55	112	T	50.8929	57	C	49.1071	55	GTATCAATTGCGTTGATGAG	TACTGCTAACCAATCCTCTA	GTATCAATTGCGTTGATGAG	TACTGCTAACCAATCCTCTA
mag1_10-2	BY4741	mag1Δ/mag1Δ	a/α	2n	VIII	300811	297662	SNP	1	T	A	1	A	97.7	84	86	A	97.6744	84				GTTTAACAAATAATCCATTA	AAAATGGTAAGAAAACATCG	GTTTAACAAATAATCCATTA	AAAATGGTAAGAAAACATCG
mag1_10-2	BY4741	mag1Δ/mag1Δ	a/α	2n	VIII	362186	359037	SNP	1	C	T	1	T	100	92	92	T	100	92				TTGCTGGGTTTGTACACCAT	ATCAGAAATAAGAATACAAC	TTGCTGGGTTTGTACACCAT	ATCAGAAATAAGAATACAAC
mag1_10-2	BY4741	mag1Δ/mag1Δ	a/α	2n	VIII	363667	360518	SNP	1	A	T	1	T	58.4	52	89	T	58.427	52				GCTACAGTATCCTTCACCAC	GTCAACTACACAACCTGTAG	GCTACAGTATCCTTCACCAC	GTCAACTACACAACCTGTAG
mag1_10-2	BY4741	mag1Δ/mag1Δ	a/α	2n	VIII	388897	385748	SNP	1	C	T	1	T	98.1	106	108	T	98.1481	106				GTGAAAAAATTATAATGGGG	GAGCTGGGAATTGAACCCAG	GTGAAAAAATTATAATGGGG	GAGCTGGGAATTGAACCCAG
mag1_10-2	BY4741	mag1Δ/mag1Δ	a/α	2n	VIII	418398	415249	SNP	1	T	C	2	C/T	52.7/47.3	58/52	110	C	52.7273	58	T	47.2727	52	AAAGTACTAATCAGTCAAGA	CTGTGTCTCCGCAAGATATT	AAAGTACTAATCAGTCAAGA	CTGTGTCTCCGCAAGATATT
mag1_10-2	BY4741	mag1Δ/mag1Δ	a/α	2n	VIII	420421	417272	SNP	1	T	G	2	T/G	54.5/45.5	54/45	99	T	54.5455	54	G	45.4545	45	GCATATTGGTTTCCTAAAAC	GGTTGCTGTGTTTGAGACTG	GCATATTGGTTTCCTAAAAC	GGTTGCTGTGTTTGAGACTG
mag1_10-2	BY4741	mag1Δ/mag1Δ	a/α	2n	VIII	438897	435748	SNP	1	T	C	1	C	98	97	99	C	97.9798	97				TTCATCGGCTAAAGAGTGTG	TTGATCAACATCAATAGCTT	TTCATCGGCTAAAGAGTGTG	TTGATCAACATCAATAGCTT
mag1_10-2	BY4741	mag1Δ/mag1Δ	a/α	2n	VIII	461118	457969	SNP	1	A	T	2	T/A	50.8/49.2	60/58	118	T	50.8475	60	A	49.1525	58	GATGCCAAAACCGCCCATTG	CTCACTATCCACTCTAGGAG	GATGCCAAAACCGCCCATTG	CTCACTATCCACTCTAGGAG
mag1_10-2	BY4741	mag1Δ/mag1Δ	a/α	2n	VIII	525165	522014	SNP	1	A	G	2	G/A	53.1/46.9	69/61	130	G	53.0769	69	A	46.9231	61	CTATGGATAGAATGGAAATA	ACGTAGGTGTAAACACTATT	CTATGGATAGAATGGAAATA	ACGTAGGTGTAAACACTATT
mag1_10-2	BY4741	mag1Δ/mag1Δ	a/α	2n	IX	27413	12177	SNP	1	C	A	2	A/C	51.4/48.6	57/54	111	A	51.3514	57	C	48.6486	54	CTTTTCGTAATACCTTATAT	ATGTCCTGTCTTGAATTGTA	CTTTTCGTAATACCTTATAT	ATGTCCTGTCTTGAATTGTA
mag1_10-2	BY4741	mag1Δ/mag1Δ	a/α	2n	IX	52505	37270	SNP	1	T	A	2	T/A	50.4/49.6	59/58	117	T	50.4274	59	A	49.5726	58	TCTTTTCACGGGGAATTCGA	ATAGTGCTGTAGTTCTTTCA	TCTTTTCACGGGGAATTCGA	ATAGTGCTGTAGTTCTTTCA
mag1_10-2	BY4741	mag1Δ/mag1Δ	a/α	2n	IX	79118	63884	SNP	1	A	G	2	A/G	53.2/46.8	67/59	126	A	53.1746	67	G	46.8254	59	AGATCAAAACCACCAGGGAA	AATGGAAGGCTTTGAAAAGC	AGATCAAAACCACCAGGGAA	AATGGAAGGCTTTGAAAAGC
mag1_10-2	BY4741	mag1Δ/mag1Δ	a/α	2n	IX	84978	69744	SNP	1	A	C	2	A/C	53.2/46.8	50/44	94	A	53.1915	50	C	46.8085	44	AATTATCCACTATATAATTC	AAGACGCGAAAAAAAAAGAA	AATTATCCACTATATAATTC	AAGACGCGAAAAAAAAAGAA
mag1_10-2	BY4741	mag1Δ/mag1Δ	a/α	2n	IX	85752	70518	SNP	1	C	T	1	T	56.8	54	95	T	56.8421	54				GTTGTTACAAACCGTCCATC	ATCTCGCTATCGTCAGATTT	GTTGTTACAAACCGTCCATC	ATCTCGCTATCGTCAGATTT
mag1_10-2	BY4741	mag1Δ/mag1Δ	a/α	2n	IX	87811	72577	SNP	1	C	T	2	T/C	53.3/46.7	57/50	107	T	53.271	57	C	46.729	50	TTGGTCAAGTTAAGGACATT	ACGGACGCATCCCAGAAATG	TTGGTCAAGTTAAGGACATT	ACGGACGCATCCCAGAAATG
mag1_10-2	BY4741	mag1Δ/mag1Δ	a/α	2n	IX	94810	79576	SNP	1	T	G	2	T/G	50.9/49.1	58/56	114	T	50.8772	58	G	49.1228	56	AAAAGGACTAGTTAGATAGC	AATTGTAAAGGGTTGGTTCC	AAAAGGACTAGTTAGATAGC	AATTGTAAAGGGTTGGTTCC
mag1_10-2	BY4741	mag1Δ/mag1Δ	a/α	2n	IX	95073	79839	SNP	1	T	C	2	C/T	52.3/47.7	58/53	111	C	52.2523	58	T	47.7477	53	CTTCAGTTTTCTTTATTTGG	TGTGTCTGGATTCATAGAGG	CTTCAGTTTTCTTTATTTGG	TGTGTCTGGATTCATAGAGG
mag1_10-2	BY4741	mag1Δ/mag1Δ	a/α	2n	IX	146258	131027	SNP	1	T	C	2	C/T	51.9/48.1	56/52	108	C	51.8519	56	T	48.1481	52	TAGCTTGCCTATGGGGGATT	TTGCGCTTCCTCCTCGACAA	TAGCTTGCCTATGGGGGATT	TTGCGCTTCCTCCTCGACAA
mag1_10-2	BY4741	mag1Δ/mag1Δ	a/α	2n	IX	183367	168136	SNP	1	A	G	2	A/G	53.2/46.8	42/37	79	A	53.1646	42	G	46.8354	37	GTACATGATCCAATAACAAG	TCAACTACGACTTTTGTTAT	GTACATGATCCAATAACAAG	TCAACTACGACTTTTGTTAT
mag1_10-2	BY4741	mag1Δ/mag1Δ	a/α	2n	IX	259967	244735	SNP	1	T	A	2	T/A	52.1/47.9	49/45	94	T	52.1277	49	A	47.8723	45	AGAATGAAAAAAAAAACTTT	TGCCCAAATAAATCATAATC	AGAATGAAAAAAAAAACTTT	TGCCCAAATAAATCATAATC
mag1_10-2	BY4741	mag1Δ/mag1Δ	a/α	2n	IX	284891	269659	SNP	1	A	G	2	A/G	53.2/46.8	58/51	109	A	53.211	58	G	46.789	51	AATGACTGAAAAGGAACCCC	AATAGTTAAAATAACAGAAG	AATGACTGAAAAGGAACCCC	AATAGTTAAAATAACAGAAG
mag1_10-2	BY4741	mag1Δ/mag1Δ	a/α	2n	IX	289383	274151	SNP	1	T	A	2	T/A	52.9/47.1	45/40	85	T	52.9412	45	A	47.0588	40	TTCTCATCTGAGACTCAATG	CCTCAATTAAGGAACCCAAA	TTCTCATCTGAGACTCAATG	CCTCAATTAAGGAACCCAAA
mag1_10-2	BY4741	mag1Δ/mag1Δ	a/α	2n	IX	298296	283064	SNP	1	T	C	1	C	56.8	50	88	C	56.8182	50				TAAAGCAGGTAAAGCTCTGA	GAAAATTGAGTGCTTCATGG	TAAAGCAGGTAAAGCTCTGA	GAAAATTGAGTGCTTCATGG
mag1_10-2	BY4741	mag1Δ/mag1Δ	a/α	2n	IX	311460	296228	SNP	1	A	G	2	A/G	52.7/47.3	58/52	110	A	52.7273	58	G	47.2727	52	GGAAGCATATTTGAAAGCTC	GAGAGGCTCCACAATTGTGG	GGAAGCATATTTGAAAGCTC	GAGAGGCTCCACAATTGTGG
mag1_10-2	BY4741	mag1Δ/mag1Δ	a/α	2n	IX	370494	355262	SNP	1	T	C	2	T/C	53.5/46.5	54/47	101	T	53.4653	54	C	46.5347	47	CTCCCCGTATCGGAGTATGT	TATTTTATTTTTTTCATATC	CTCCCCGTATCGGAGTATGT	TATTTTATTTTTTTCATATC
mag1_10-2	BY4741	mag1Δ/mag1Δ	a/α	2n	X	26037	13270	SNP	1	T	C	1	C	97.3	109	112	C	97.3214	109				TGAAACTAGCAGGATAAATT	GGTAGACGGTGGCTTCTTTC	TGAAACTAGCAGGATAAATT	GGTAGACGGTGGCTTCTTTC
mag1_10-2	BY4741	mag1Δ/mag1Δ	a/α	2n	X	35342	22575	SNP	1	T	A	1	A	56.2	68	121	A	56.1983	68				TCGACCCCCATAGGATAACG	TGAAATAGGACAGACCGGTA	TCGACCCCCATAGGATAACG	TGAAATAGGACAGACCGGTA
mag1_10-2	BY4741	mag1Δ/mag1Δ	a/α	2n	X	42519	29752	SNP	1	T	C	1	C	99.1	115	116	C	99.1379	115				ATCATCCTCAAATATACTTT	TATGCACAGATTGCTCTTCA	ATCATCCTCAAATATACTTT	TATGCACAGATTGCTCTTCA
mag1_10-2	BY4741	mag1Δ/mag1Δ	a/α	2n	X	54643	41876	SNP	1	A	G	1	G	56.1	69	123	G	56.0976	69				ACGGTATTAAAATGTTTGCA	AGTTACCCAAAGAGACCAAG	ACGGTATTAAAATGTTTGCA	AGTTACCCAAAGAGACCAAG
mag1_10-2	BY4741	mag1Δ/mag1Δ	a/α	2n	X	58851	46084	SNP	1	A	T	2	T/A	50.9/49.1	56/54	110	T	50.9091	56	A	49.0909	54	GCTCTTAGAGTTTTATGTTT	AAGAAAGTCGAAAATTCTTA	GCTCTTAGAGTTTTATGTTT	AAGAAAGTCGAAAATTCTTA
mag1_10-2	BY4741	mag1Δ/mag1Δ	a/α	2n	X	65573	52806	SNP	1	A	G	2	A/G	50.0/50.0	58/58	116	A	50	58	G	50	58	CAAATCGTCCACTTATATGG	CTTGAAGAATTATGTTGGTA	CAAATCGTCCACTTATATGG	CTTGAAGAATTATGTTGGTA
mag1_10-2	BY4741	mag1Δ/mag1Δ	a/α	2n	X	114094	101327	SNP	1	T	C	2	T/C	54.7/45.3	70/58	128	T	54.6875	70	C	45.3125	58	GTTTCTTTAAGTTTGTTACA	TGGTTATTAAACAGCTGCAC	GTTTCTTTAAGTTTGTTACA	TGGTTATTAAACAGCTGCAC
mag1_10-2	BY4741	mag1Δ/mag1Δ	a/α	2n	X	139588	126821	SNP	1	T	C	1	C	100	62	62	C	100	62				ACTCAGACATCCTAGGAAGG	CTCTAAAGAAGAGCGGTCAC	ACTCAGACATCCTAGGAAGG	CTCTAAAGAAGAGCGGTCAC
mag1_10-2	BY4741	mag1Δ/mag1Δ	a/α	2n	X	144989	132222	SNP	1	T	A	2	T/A	54.1/45.9	33/28	61	T	54.0984	33	A	45.9016	28	GTTATTTTAGCACTTCTACA	TCTCGGGTGTGGCTAGAATT	GTTATTTTAGCACTTCTACA	TCTCGGGTGTGGCTAGAATT
mag1_10-2	BY4741	mag1Δ/mag1Δ	a/α	2n	X	150749	137982	SNP	1	G	A	1	A	98.9	92	93	A	98.9247	92				CCTTTTTAGGTGTCATTTAC	TGCAACGCGACAATAGTGAT	CCTTTTTAGGTGTCATTTAC	TGCAACGCGACAATAGTGAT
mag1_10-2	BY4741	mag1Δ/mag1Δ	a/α	2n	X	165477	152710	SNP	1	A	T	2	A/T	54.4/45.6	49/41	90	A	54.4444	49	T	45.5556	41	TTACCGTCGCGGGAAAATTC	GGTAAAATTCAAGAGCTCAG	TTACCGTCGCGGGAAAATTC	GGTAAAATTCAAGAGCTCAG
mag1_10-2	BY4741	mag1Δ/mag1Δ	a/α	2n	X	199723	186956	SNP	1	A	T	2	T/A	51.2/48.8	43/41	84	T	51.1905	43	A	48.8095	41	GTCAAACCTGTAAAATCTCT	AAGCCACGAAAAGAAATCAT	GTCAAACCTGTAAAATCTCT	AAGCCACGAAAAGAAATCAT
mag1_10-2	BY4741	mag1Δ/mag1Δ	a/α	2n	X	241949	229182	SNP	1	A	G	2	A/G	54.9/45.1	45/37	82	A	54.878	45	G	45.122	37	AAAAGATATATTTTACTAAG	TCTTTAAATATTTTTAGCTT	AAAAGATATATTTTACTAAG	TCTTTAAATATTTTTAGCTT
mag1_10-2	BY4741	mag1Δ/mag1Δ	a/α	2n	X	256771	244004	SNP	1	T	C	1	C	97.7	84	86	C	97.6744	84				ACTGTCGCCATATTGCCATA	CCCAGCGTTTGTTTGGCAAA	ACTGTCGCCATATTGCCATA	CCCAGCGTTTGTTTGGCAAA
mag1_10-2	BY4741	mag1Δ/mag1Δ	a/α	2n	X	259761	246994	SNP	1	A	T	2	A/T	51.7/48.3	45/42	87	A	51.7241	45	T	48.2759	42	ACTATACCGAATTTTGAACA	AAAGCCGCCTGCTGAAGATG	ACTATACCGAATTTTGAACA	AAAGCCGCCTGCTGAAGATG
mag1_10-2	BY4741	mag1Δ/mag1Δ	a/α	2n	X	264097	251330	SNP	1	A	G	2	G/A	50.5/49.5	46/45	91	G	50.5495	46	A	49.4505	45	CAAAGTACTATTATCACTTA	ATCTTCTTGTTTGTTATTTA	CAAAGTACTATTATCACTTA	ATCTTCTTGTTTGTTATTTA
mag1_10-2	BY4741	mag1Δ/mag1Δ	a/α	2n	X	309142	296375	SNP	1	T	C	1	C	96.4	81	84	C	96.4286	81				GCTTCCATCGTAGCAACCAT	GAGAAAATTTCTTGTACCAG	GCTTCCATCGTAGCAACCAT	GAGAAAATTTCTTGTACCAG
mag1_10-2	BY4741	mag1Δ/mag1Δ	a/α	2n	X	316093	303326	SNP	1	T	C	2	C/T	51.2/48.8	44/42	86	C	51.1628	44	T	48.8372	42	ATTCGGACATCACGGGAGAG	CGACTAGTTCCAAGACGGAT	ATTCGGACATCACGGGAGAG	CGACTAGTTCCAAGACGGAT
mag1_10-2	BY4741	mag1Δ/mag1Δ	a/α	2n	X	319227	306460	SNP	1	T	A	1	A	58.8	40	68	A	58.8235	40				CTTTTGATGTTCCAAACTTC	TCTCAGAACATAGGTCAATT	CTTTTGATGTTCCAAACTTC	TCTCAGAACATAGGTCAATT
mag1_10-2	BY4741	mag1Δ/mag1Δ	a/α	2n	X	319542	306775	SNP	1	C	A	2	C/A	53.4/46.6	39/34	73	C	53.4247	39	A	46.5753	34	CCGTGGTCAATAAACTACGC	TCTATTCCAGCACAAGTTAA	CCGTGGTCAATAAACTACGC	TCTATTCCAGCACAAGTTAA
mag1_10-2	BY4741	mag1Δ/mag1Δ	a/α	2n	X	433489	420722	SNP	1	T	A	2	T/A	53.2/46.8	50/44	94	T	53.1915	50	A	46.8085	44	GAGAATCAATATCGAATATT	CGGCCCCTTCCGGAAGAAAT	GAGAATCAATATCGAATATT	CGGCCCCTTCCGGAAGAAAT
mag1_10-2	BY4741	mag1Δ/mag1Δ	a/α	2n	X	496159	478503	SNP	1	T	A	2	A/T	50.0/50.0	44/44	88	A	50	44	T	50	44	AGTTTACTGGCGTGTCATCA	GGAACAACTGGCAACATTGG	AGTTTACTGGCGTGTCATCA	GGAACAACTGGCAACATTGG
mag1_10-2	BY4741	mag1Δ/mag1Δ	a/α	2n	X	498528	480872	SNP	1	A	G	1	G	57.1	48	84	G	57.1429	48				CTTCTGACCAAAAATTTAAG	TGGATGAAAACGATCTAGAG	CTTCTGACCAAAAATTTAAG	TGGATGAAAACGATCTAGAG
mag1_10-2	BY4741	mag1Δ/mag1Δ	a/α	2n	X	506291	488635	SNP	1	A	G	2	A/G	50.6/49.4	43/42	85	A	50.5882	43	G	49.4118	42	TAAAATATGAAAACGCTATG	TATCAGATATTATTGCCGTA	TAAAATATGAAAACGCTATG	TATCAGATATTATTGCCGTA
mag1_10-2	BY4741	mag1Δ/mag1Δ	a/α	2n	X	541567	523911	SNP	1	C	G	2	G/C	51.0/49.0	49/47	96	G	51.0417	49	C	48.9583	47	TGCCAGATCGGGGTTCAATT	CCCGTCGCGGAGATTTTTTT	TGCCAGATCGGGGTTCAATT	CCCGTCGCGGAGATTTTTTT
mag1_10-2	BY4741	mag1Δ/mag1Δ	a/α	2n	X	544148	526492	SNP	1	G	A	2	A/G	52.5/47.5	63/57	120	A	52.5	63	G	47.5	57	AATATTCTTTACAAAAAATT	CAACCAAACTGTAAACTATT	AATATTCTTTACAAAAAATT	CAACCAAACTGTAAACTATT
mag1_10-2	BY4741	mag1Δ/mag1Δ	a/α	2n	X	558052	540396	SNP	1	T	A	2	T/A	51.2/48.8	42/40	82	T	51.2195	42	A	48.7805	40	ATAGACTTTAGATCTCTTTG	AAACGACGTCCAAAATCTTT	ATAGACTTTAGATCTCTTTG	AAACGACGTCCAAAATCTTT
mag1_10-2	BY4741	mag1Δ/mag1Δ	a/α	2n	X	562273	544617	SNP	1	A	G	2	A/G	52.7/47.3	58/52	110	A	52.7273	58	G	47.2727	52	AAAATGTGTTTCATTCTTGG	CCAGATCATCCCAACTATTT	AAAATGTGTTTCATTCTTGG	CCAGATCATCCCAACTATTT
mag1_10-2	BY4741	mag1Δ/mag1Δ	a/α	2n	X	601836	584180	SNP	1	A	G	2	G/A	51.4/48.6	56/53	109	G	51.3761	56	A	48.6239	53	GAAACCGATGGTTTGAAACA	GATATTCCTCCACTGCTAGC	GAAACCGATGGTTTGAAACA	GATATTCCTCCACTGCTAGC
mag1_10-2	BY4741	mag1Δ/mag1Δ	a/α	2n	X	601986	584330	SNP	1	A	C	2	C/A	50.4/49.6	57/56	113	C	50.4425	57	A	49.5575	56	AAGGCTATTTCCACGCTTGC	TTATATGGAACTAAGAGTCA	AAGGCTATTTCCACGCTTGC	TTATATGGAACTAAGAGTCA
mag1_10-2	BY4741	mag1Δ/mag1Δ	a/α	2n	X	605411	587755	SNP	1	T	A	2	T/A	53.4/46.6	63/55	118	T	53.3898	63	A	46.6102	55	ATTGAACAATATTTGAGGAT	AATTAAATGAATTGGTTGTG	ATTGAACAATATTTGAGGAT	AATTAAATGAATTGGTTGTG
mag1_10-2	BY4741	mag1Δ/mag1Δ	a/α	2n	X	614624	596968	SNP	1	T	A	2	A/T	50.0/50.0	52/52	104	A	50	52	T	50	52	ATTTAAATAATTCTATCTCT	CCAAGGAAGAAATGGAGGTT	ATTTAAATAATTCTATCTCT	CCAAGGAAGAAATGGAGGTT
mag1_10-2	BY4741	mag1Δ/mag1Δ	a/α	2n	X	625815	608159	SNP	1	A	T	2	A/T	52.2/47.8	47/43	90	A	52.2222	47	T	47.7778	43	AATGCGTTTACGGAATATAG	GATTCTGAAAGAGCAATAAA	AATGCGTTTACGGAATATAG	GATTCTGAAAGAGCAATAAA
mag1_10-2	BY4741	mag1Δ/mag1Δ	a/α	2n	X	721420	703765	SNP	1	T	C	1	C	68	70	103	C	67.9612	70				TGTAAGCTACATTCTCTTGG	GTAGAAGATTTCTCGACTGA	TGTAAGCTACATTCTCTTGG	GTAGAAGATTTCTCGACTGA
mag1_10-2	BY4741	mag1Δ/mag1Δ	a/α	2n	XI	887	888	SNP	1	A	G	2	G/A	53.4/46.6	63/55	118	G	53.3898	63	A	46.6102	55	CTTGAACGGATGCCATTTCA	AATATTTCGTACTTACACAG	CTTGAACGGATGCCATTTCA	AATATTTCGTACTTACACAG
mag1_10-2	BY4741	mag1Δ/mag1Δ	a/α	2n	XI	1087	1088	SNP	1	A	G	1	G	58.2	82	141	G	58.156	82				TATCTTTAATCTTGTATGTG	CACTACTCATACGAAGAGAC	TATCTTTAATCTTGTATGTG	CACTACTCATACGAAGAGAC
mag1_10-2	BY4741	mag1Δ/mag1Δ	a/α	2n	XI	35626	35627	SNP	1	T	C	2	C/T	53.0/47.0	70/62	132	C	53.0303	70	T	46.9697	62	ACCTGGAGAAATTAGGTTTA	CTAACGAAGATTTCTTCCAC	ACCTGGAGAAATTAGGTTTA	CTAACGAAGATTTCTTCCAC
mag1_10-2	BY4741	mag1Δ/mag1Δ	a/α	2n	XI	63679	63680	SNP	1	T	A	2	T/A	53.4/46.6	62/54	116	T	53.4483	62	A	46.5517	54	CAAGAAATATACGATATAAC	TAAAGAAAAGAGTTGTAGTA	CAAGAAATATACGATATAAC	TAAAGAAAAGAGTTGTAGTA
mag1_10-2	BY4741	mag1Δ/mag1Δ	a/α	2n	XI	89838	89842	SNP	1	A	T	2	A/T	54.9/45.1	50/41	91	A	54.9451	50	T	45.0549	41	GAACATATATCTGTTAAAGT	CAGTAATATAATAAAAATCA	GAACATATATCTGTTAAAGT	CAGTAATATAATAAAAATCA
mag1_10-2	BY4741	mag1Δ/mag1Δ	a/α	2n	XI	104552	104556	SNP	1	T	G	2	T/G	53.3/46.7	49/43	92	T	53.2609	49	G	46.7391	43	AAAGATTTCGAGATCACCGC	AAAGAAGTTTATGACTTTAC	AAAGATTTCGAGATCACCGC	AAAGAAGTTTATGACTTTAC
mag1_10-2	BY4741	mag1Δ/mag1Δ	a/α	2n	XI	160066	160070	SNP	1	T	C	2	T/C	52.8/47.2	47/42	89	T	52.809	47	C	47.191	42	ACGCATTTCCTTGAGAACCA	CCCATGAAGTAGCGAGAAGT	ACGCATTTCCTTGAGAACCA	CCCATGAAGTAGCGAGAAGT
mag1_10-2	BY4741	mag1Δ/mag1Δ	a/α	2n	XI	197793	197796	SNP	1	T	C	2	C/T	54.0/46.0	47/40	87	C	54.023	47	T	45.977	40	ATCCTTTCGTTTTAGACTCA	TGCAGGATAAGTAATCACCC	ATCCTTTCGTTTTAGACTCA	TGCAGGATAAGTAATCACCC
mag1_10-2	BY4741	mag1Δ/mag1Δ	a/α	2n	XI	232068	232071	SNP	1	A	G	2	G/A	51.9/48.1	40/37	77	G	51.9481	40	A	48.0519	37	AAAGGGTCATTATTTATTTG	GCAGATCATTATCAAACGCA	AAAGGGTCATTATTTATTTG	GCAGATCATTATCAAACGCA
mag1_10-2	BY4741	mag1Δ/mag1Δ	a/α	2n	XI	278324	278327	SNP	1	T	C	2	C/T	53.3/46.7	32/28	60	C	53.3333	32	T	46.6667	28	AAAACCAACAGAAATTCCTC	CTCAGAGATCAGACGCCCCC	AAAACCAACAGAAATTCCTC	CTCAGAGATCAGACGCCCCC
mag1_10-2	BY4741	mag1Δ/mag1Δ	a/α	2n	XI	309146	309149	SNP	1	G	C	1	C	56.7	55	97	C	56.701	55				TCCCGCGAATTTTCAAGTGA	ACTTAATGGTAGCCATCTAG	TCCCGCGAATTTTCAAGTGA	ACTTAATGGTAGCCATCTAG
mag1_10-2	BY4741	mag1Δ/mag1Δ	a/α	2n	XI	313430	313433	SNP	1	C	T	2	T/C	52.7/47.3	59/53	112	T	52.6786	59	C	47.3214	53	CTAGAATCGAACCAGGGTTT	ATCGGCCACAACGATGTGTA	CTAGAATCGAACCAGGGTTT	ATCGGCCACAACGATGTGTA
mag1_10-2	BY4741	mag1Δ/mag1Δ	a/α	2n	XI	340441	340444	SNP	1	T	C	2	T/C	51.8/47.0	43/39	83	T	51.8072	43	C	46.988	39	GTGTGGGATGATGTCCTGGG	GATCTTATGAAAGCAGAAAC	GTGTGGGATGATGTCCTGGG	GATCTTATGAAAGCAGAAAC
mag1_10-2	BY4741	mag1Δ/mag1Δ	a/α	2n	XI	346526	346529	SNP	1	T	C	2	T/C	51.6/48.4	49/46	95	T	51.5789	49	C	48.4211	46	TTTCTGTCTCGATTTCTAGA	TACCTGCTTGGTCTTCGTAG	TTTCTGTCTCGATTTCTAGA	TACCTGCTTGGTCTTCGTAG
mag1_10-2	BY4741	mag1Δ/mag1Δ	a/α	2n	XI	358110	358113	SNP	1	T	A	2	A/T	52.2/47.8	36/33	69	A	52.1739	36	T	47.8261	33	ACAAATCTTTATCTGTCTAC	TCTAATATACTGTACATCAT	ACAAATCTTTATCTGTCTAC	TCTAATATACTGTACATCAT
mag1_10-2	BY4741	mag1Δ/mag1Δ	a/α	2n	XI	396910	396912	SNP	1	A	T	2	T/A	51.6/48.4	47/44	91	T	51.6484	47	A	48.3516	44	GATGGCTGGTGCGGAGTCAT	ATATTCGCTTGCAACTTCTG	GATGGCTGGTGCGGAGTCAT	ATATTCGCTTGCAACTTCTG
mag1_10-2	BY4741	mag1Δ/mag1Δ	a/α	2n	XI	487402	487402	SNP	1	T	A	2	T/A	51.4/48.6	54/51	105	T	51.4286	54	A	48.5714	51	AAATTGCTGAATAAGTATGC	TATTTGGAATATGAATAATC	AAATTGCTGAATAAGTATGC	TATTTGGAATATGAATAATC
mag1_10-2	BY4741	mag1Δ/mag1Δ	a/α	2n	XI	517023	517023	SNP	1	A	G	2	G/A	50.9/49.1	58/56	114	G	50.8772	58	A	49.1228	56	TAAGATAAATTATACTATGA	AGAAAGTAAGGTATTTCTAT	TAAGATAAATTATACTATGA	AGAAAGTAAGGTATTTCTAT
mag1_10-2	BY4741	mag1Δ/mag1Δ	a/α	2n	XI	548063	548063	SNP	1	A	T	2	T/A	50.5/49.5	48/47	95	T	50.5263	48	A	49.4737	47	GCTTATTTATTAGAATCCGT	CAATGCGACCTTCCGCGCAT	GCTTATTTATTAGAATCCGT	CAATGCGACCTTCCGCGCAT
mag1_10-2	BY4741	mag1Δ/mag1Δ	a/α	2n	XI	564162	564162	SNP	1	C	A	2	C/A	51.7/48.3	61/57	118	C	51.6949	61	A	48.3051	57	GTCGAAAAACGAAAAAGAAA	AATGCGTCATTTTGATTTCG	GTCGAAAAACGAAAAAGAAA	AATGCGTCATTTTGATTTCG
mag1_10-2	BY4741	mag1Δ/mag1Δ	a/α	2n	XI	564531	564531	SNP	1	A	G	1	G	61.7	66	107	G	61.6822	66				GGTCTCGTCTGTGTATTTTA	CGAATTTGGCTTTGAGTACT	GGTCTCGTCTGTGTATTTTA	CGAATTTGGCTTTGAGTACT
mag1_10-2	BY4741	mag1Δ/mag1Δ	a/α	2n	XI	564642	564642	SNP	1	A	T	2	A/T	52.7/47.3	68/61	129	A	52.7132	68	T	47.2868	61	TGCATGGAGAATTATTTTAA	ATTTTTGCTGAATGAATTGA	TGCATGGAGAATTATTTTAA	ATTTTTGCTGAATGAATTGA
mag1_10-2	BY4741	mag1Δ/mag1Δ	a/α	2n	XI	617782	617782	SNP	1	T	C	2	T/C	53.9/46.1	55/47	102	T	53.9216	55	C	46.0784	47	TCCTCTTCAGGCTCACTGTA	CCGTTTACTCTTATTTCGCG	TCCTCTTCAGGCTCACTGTA	CCGTTTACTCTTATTTCGCG
mag1_10-2	BY4741	mag1Δ/mag1Δ	a/α	2n	XI	619515	619515	SNP	1	T	C	2	C/T	51.9/48.1	68/63	131	C	51.9084	68	T	48.0916	63	TCTTCTTTATAATATGATGA	CGACGCGCGGGGTAACGCGC	TCTTCTTTATAATATGATGA	CGACGCGCGGGGTAACGCGC
mag1_10-2	BY4741	mag1Δ/mag1Δ	a/α	2n	XI	646881	646881	SNP	1	T	C	2	C/T	52.5/47.5	53/48	101	C	52.4752	53	T	47.5248	48	CAAAAACTGGTACCTACACA	TTGGCTTCGCTACTGTGGAT	CAAAAACTGGTACCTACACA	TTGGCTTCGCTACTGTGGAT
mag1_10-2	BY4741	mag1Δ/mag1Δ	a/α	2n	XI	649626	649626	SNP	1	A	T	1	T	96	97	101	T	96.0396	97				AAACACATACAACCACTACA	GCAACGCGTCTGAAAATAGC	AAACACATACAACCACTACA	GCAACGCGTCTGAAAATAGC
mag1_10-2	BY4741	mag1Δ/mag1Δ	a/α	2n	XI	663973	663973	SNP	1	A	T	2	T/A	53.2/46.8	58/51	109	T	53.211	58	A	46.789	51	CATTGTGTCGGAATTTACAC	TTACTGATATAATTCGTCCC	CATTGTGTCGGAATTTACAC	TTACTGATATAATTCGTCCC
mag1_10-2	BY4741	mag1Δ/mag1Δ	a/α	2n	XII	23908	16805	SNP	1	A	G	2	A/G	54.7/45.3	64/53	117	A	54.7009	64	G	45.2991	53	CGATTAAAAACCGTGGGGCA	AAACGTCGAAAGAACCGGCG	CGATTAAAAACCGTGGGGCA	AAACGTCGAAAGAACCGGCG
mag1_10-2	BY4741	mag1Δ/mag1Δ	a/α	2n	XII	24372	17269	SNP	1	A	T	2	A/T	50.4/49.6	57/56	113	A	50.4425	57	T	49.5575	56	GACCAAAAGAAAAAGCCATT	TTATGTGACACTGTTGGCAT	GACCAAAAGAAAAAGCCATT	TTATGTGACACTGTTGGCAT
mag1_10-2	BY4741	mag1Δ/mag1Δ	a/α	2n	XII	33846	26743	SNP	1	T	A	2	A/T	51.2/48.8	62/59	121	A	51.2397	62	T	48.7603	59	GAAGCGTAATTTCTCTCAAA	AGTTCTGGTAGAGATTCGTC	GAAGCGTAATTTCTCTCAAA	AGTTCTGGTAGAGATTCGTC
mag1_10-2	BY4741	mag1Δ/mag1Δ	a/α	2n	XII	40463	33360	SNP	1	A	T	2	T/A	54.3/45.7	63/53	116	T	54.3103	63	A	45.6897	53	TGTTTTGAAATCTGAAGTTT	CGTAGTTGCTAACCAGTCTT	TGTTTTGAAATCTGAAGTTT	CGTAGTTGCTAACCAGTCTT
mag1_10-2	BY4741	mag1Δ/mag1Δ	a/α	2n	XII	47654	40551	SNP	1	T	C	2	T/C	52.9/47.1	64/57	121	T	52.8926	64	C	47.1074	57	GGCGGCTATTTGTTGTATCG	CGACAGTGACGCTGATTCTT	GGCGGCTATTTGTTGTATCG	CGACAGTGACGCTGATTCTT
mag1_10-2	BY4741	mag1Δ/mag1Δ	a/α	2n	XII	52910	45806	SNP	1	T	A	2	T/A	53.6/46.4	59/51	110	T	53.6364	59	A	46.3636	51	GAAGATACTAGAACACCTTG	CGCCTATGATGGACATATAT	GAAGATACTAGAACACCTTG	CGCCTATGATGGACATATAT
mag1_10-2	BY4741	mag1Δ/mag1Δ	a/α	2n	XII	57430	50326	SNP	1	T	C	2	T/C	51.4/48.6	57/54	111	T	51.3514	57	C	48.6486	54	CCAATTTCGAAATGAAATCT	TGATTGGAATCTTCTTTTGA	CCAATTTCGAAATGAAATCT	TGATTGGAATCTTCTTTTGA
mag1_10-2	BY4741	mag1Δ/mag1Δ	a/α	2n	XII	63067	55963	SNP	1	T	C	2	T/C	54.1/45.9	59/50	109	T	54.1284	59	C	45.8716	50	GCCCAGTTGGAATCTGTAGA	ACAGCTGATAGCTCGTTCAA	GCCCAGTTGGAATCTGTAGA	ACAGCTGATAGCTCGTTCAA
mag1_10-2	BY4741	mag1Δ/mag1Δ	a/α	2n	XII	79415	72311	SNP	1	T	A	2	T/A	51.3/48.7	60/57	117	T	51.2821	60	A	48.7179	57	ATTGATCTACTTGAATTTGT	TTTCCCTCATAGTAAAATGG	ATTGATCTACTTGAATTTGT	TTTCCCTCATAGTAAAATGG
mag1_10-2	BY4741	mag1Δ/mag1Δ	a/α	2n	XII	92681	85577	SNP	1	A	G	2	G/A	52.3/47.7	46/42	88	G	52.2727	46	A	47.7273	42	TTTTTTGGACCCAAAGCACT	GCTTAGGCTGTCCATCTTTG	TTTTTTGGACCCAAAGCACT	GCTTAGGCTGTCCATCTTTG
mag1_10-2	BY4741	mag1Δ/mag1Δ	a/α	2n	XII	143372	136268	SNP	1	G	A	2	G/A	53.0/47.0	62/55	117	G	52.9915	62	A	47.0085	55	CAGAAAGGTATATTGTTAAC	CTTTAAAGCCTATAGAATTA	CAGAAAGGTATATTGTTAAC	CTTTAAAGCCTATAGAATTA
mag1_10-2	BY4741	mag1Δ/mag1Δ	a/α	2n	XII	161320	154216	SNP	1	T	C	2	T/C	53.2/46.8	41/36	77	T	53.2468	41	C	46.7532	36	AATGGTAAACTACTGACAAG	TCTCGCTATCGTTGTGAAGA	AATGGTAAACTACTGACAAG	TCTCGCTATCGTTGTGAAGA
mag1_10-2	BY4741	mag1Δ/mag1Δ	a/α	2n	XII	210821	203716	SNP	1	T	A	2	T/A	54.2/45.8	52/44	96	T	54.1667	52	A	45.8333	44	TGAGAAAAATTCAAAATATC	GAAATTCCCTTTTCCCCCAT	TGAGAAAAATTCAAAATATC	GAAATTCCCTTTTCCCCCAT
mag1_10-2	BY4741	mag1Δ/mag1Δ	a/α	2n	XII	293023	282591	SNP	1	T	C	2	T/C	51.6/48.4	49/46	95	T	51.5789	49	C	48.4211	46	TTGATGACATAATATAGGTC	CCTTTTACTTGCTCTCTTTG	TTGATGACATAATATAGGTC	CCTTTTACTTGCTCTCTTTG
mag1_10-2	BY4741	mag1Δ/mag1Δ	a/α	2n	XII	297525	287093	SNP	1	A	G	2	A/G	53.7/46.3	44/38	82	A	53.6585	44	G	46.3415	38	TCTCCGCCGACAAGCATACT	CAGTTTTTTTCAAAGTTAAC	TCTCCGCCGACAAGCATACT	CAGTTTTTTTCAAAGTTAAC
mag1_10-2	BY4741	mag1Δ/mag1Δ	a/α	2n	XII	301151	290719	SNP	1	T	C	1	C	61.3	49	80	C	61.25	49				CGTAACCAAGAAAGCTTGTT	GGAAGTCAGGAAGTACATAT	CGTAACCAAGAAAGCTTGTT	GGAAGTCAGGAAGTACATAT
mag1_10-2	BY4741	mag1Δ/mag1Δ	a/α	2n	XII	303328	292896	SNP	1	A	G	1	G	60.5	49	81	G	60.4938	49				GAAAAGGAAAATAGATTTGA	ATTGTTGATAGAGAAAAAAA	GAAAAGGAAAATAGATTTGA	ATTGTTGATAGAGAAAAAAA
mag1_10-2	BY4741	mag1Δ/mag1Δ	a/α	2n	XII	315763	305331	SNP	1	T	A	2	T/A	54.4/45.6	31/26	57	T	54.386	31	A	45.614	26	TATTACCGTCAATAGAAGAC	TGAGTCAGGTGGCTTTAATG	TATTACCGTCAATAGAAGAC	TGAGTCAGGTGGCTTTAATG
mag1_10-2	BY4741	mag1Δ/mag1Δ	a/α	2n	XII	391758	381326	SNP	1	T	C	2	T/C	50.9/49.1	29/28	57	T	50.8772	29	C	49.1228	28	GTTTTTCTTGTGCTTGGTAT	GCTTCGTGGAGATATATATT	GTTTTTCTTGTGCTTGGTAT	GCTTCGTGGAGATATATATT
mag1_10-2	BY4741	mag1Δ/mag1Δ	a/α	2n	XII	425645	415213	SNP	1	A	T	2	T/A	53.3/46.7	32/28	60	T	53.3333	32	A	46.6667	28	GTACAAAGAGTTTGTCCAGT	CTCCAGTAGACCAAATTGTC	GTACAAAGAGTTTGTCCAGT	CTCCAGTAGACCAAATTGTC
mag1_10-2	BY4741	mag1Δ/mag1Δ	a/α	2n	XII	448433	438001	SNP	1	T	G	1	G	62.3	33	53	G	62.2642	33				CGCGTTTTGTCATTTTTCGA	GAAGGTCGAACGGAAAGAAC	CGCGTTTTGTCATTTTTCGA	GAAGGTCGAACGGAAAGAAC
mag1_10-2	BY4741	mag1Δ/mag1Δ	a/α	2n	XII	451539	441107	SNP	1	G	A	1	A	60	9	15	A	60	9				TTTCAACCCATCTTTGCAAC	AAAAAAAAAAAAAAAATAAA	TTTCAACCCATCTTTGCAAA	AAAAAAAAAAAAAAAATAAA
mag1_10-2	BY4741	mag1Δ/mag1Δ	a/α	2n	XII	519863	477358	SNP	1	A	C	1	C	58.1	43	74	C	58.1081	43				AAAGTTTTAGGGAAGAGAGC	AAAAGCTAGGAATAATTGCA	AAAGTTTTAGGGAAGAGAGC	AAAAGCTAGGAATAATTGCA
mag1_10-2	BY4741	mag1Δ/mag1Δ	a/α	2n	XII	545080	502575	SNP	1	A	G	1	G	55.3	42	76	G	55.2632	42				GACGAAAGTCAAATGAGTAA	TACTGGTCTGCCATGGCAGG	GACGAAAGTCAAATGAGTAA	TACTGGTCTGCCATGGCAGG
mag1_10-2	BY4741	mag1Δ/mag1Δ	a/α	2n	XII	556809	514304	SNP	1	C	A	2	C/A	52.7/47.3	39/35	74	C	52.7027	39	A	47.2973	35	TGATAACACTCTTATTATAC	TGTGCGTAATATGTAACGCA	TGATAACACTCTTATTATAC	TGTGCGTAATATGTAACGCA
mag1_10-2	BY4741	mag1Δ/mag1Δ	a/α	2n	XII	617325	572849	SNP	1	G	A	1	A	58.9	43	73	A	58.9041	43				ATACACCTCGACATGGGGCT	AAGCTTTCGACAAATCTTAA	ATACACCTCGACATGGGGCT	AAGCTTTCGACAAATCTTAA
mag1_10-2	BY4741	mag1Δ/mag1Δ	a/α	2n	XII	663479	617649	SNP	1	T	A	2	A/T	52.5/47.5	32/29	61	A	52.459	32	T	47.541	29	GCTAACATGTCGGTGTATTC	GACTTAGAGGCATCGTAACC	GCTAACATGTCGGTGTATTC	GACTTAGAGGCATCGTAACC
mag1_10-2	BY4741	mag1Δ/mag1Δ	a/α	2n	XII	694697	648867	SNP	1	C	T	2	T/C	51.7/48.3	45/42	87	T	51.7241	45	C	48.2759	42	AAATGTGAAGGAGCTTTGGA	AGAGAAGAAGGGCAAAAATG	AAATGTGAAGGAGCTTTGGA	AGAGAAGAAGGGCAAAAATG
mag1_10-2	BY4741	mag1Δ/mag1Δ	a/α	2n	XII	697417	651587	SNP	1	C	A	1	A	55.8	48	86	A	55.814	48				ACCCTCTCAACTTCATCAAT	TTACCTTGTGCATTAGACTG	ACCCTCTCAACTTCATCAAT	TTACCTTGTGCATTAGACTG
mag1_10-2	BY4741	mag1Δ/mag1Δ	a/α	2n	XII	706316	660486	SNP	1	T	C	2	T/C	51.3/48.7	39/37	76	T	51.3158	39	C	48.6842	37	AGTTAGCCTTATTGAATGCA	CGATGTGGTTCGATTTCAGC	AGTTAGCCTTATTGAATGCA	CGATGTGGTTCGATTTCAGC
mag1_10-2	BY4741	mag1Δ/mag1Δ	a/α	2n	XII	714407	668577	SNP	1	A	C	2	A/C	50.0/50.0	36/36	72	A	50	36	C	50	36	ATAGCGTCATTTGGGCCGCT	GTATGTACAATTTCTTCGAA	ATAGCGTCATTTGGGCCGCT	GTATGTACAATTTCTTCGAA
mag1_10-2	BY4741	mag1Δ/mag1Δ	a/α	2n	XII	719894	674064	SNP	1	A	C	2	A/C	53.0/47.0	44/39	83	A	53.012	44	C	46.988	39	CCTCTCTCGCATGTTGCCCT	GCCTCTTCCCACTGTCTCAA	CCTCTCTCGCATGTTGCCCT	GCCTCTTCCCACTGTCTCAA
mag1_10-2	BY4741	mag1Δ/mag1Δ	a/α	2n	XII	753218	705931	SNP	1	T	G	2	T/G	50.7/49.3	37/36	73	T	50.6849	37	G	49.3151	36	CTGCCGATACCGAATCTTGT	GCTTAGGATCCACTGGTTCT	CTGCCGATACCGAATCTTGT	GCTTAGGATCCACTGGTTCT
mag1_10-2	BY4741	mag1Δ/mag1Δ	a/α	2n	XII	772153	724866	SNP	1	A	G	2	A/G	54.8/45.2	46/38	84	A	54.7619	46	G	45.2381	38	CTCCTTCCGTAGTAACTGAT	CACAAGTTACTACGGGGCTT	CTCCTTCCGTAGTAACTGAT	CACAAGTTACTACGGGGCTT
mag1_10-2	BY4741	mag1Δ/mag1Δ	a/α	2n	XII	781334	734047	SNP	1	T	A	1	A	60.2	53	88	A	60.2273	53				GGTCTTAACGTCAGCTCTTC	GGTCAATTCCAAAAATTGTT	GGTCTTAACGTCAGCTCTTC	GGTCAATTCCAAAAATTGTT
mag1_10-2	BY4741	mag1Δ/mag1Δ	a/α	2n	XII	812271	764985	SNP	1	A	T	2	A/T	51.3/48.7	40/38	78	A	51.2821	40	T	48.7179	38	AAGTATGGAATGCCATCATT	TTTCAATGTACAGAGAACAT	AAGTATGGAATGCCATCATT	TTTCAATGTACAGAGAACAT
mag1_10-2	BY4741	mag1Δ/mag1Δ	a/α	2n	XII	836018	788732	SNP	1	A	G	2	A/G	50.7/49.3	37/36	73	A	50.6849	37	G	49.3151	36	GTTGCTTATGAATAAAGAAC	CCGAGCGGCTTTGCTGCAAG	GTTGCTTATGAATAAAGAAC	CCGAGCGGCTTTGCTGCAAG
mag1_10-2	BY4741	mag1Δ/mag1Δ	a/α	2n	XII	844173	796887	SNP	1	A	T	2	A/T	53.6/46.4	45/39	84	A	53.5714	45	T	46.4286	39	ATTAATAGTAGCCATATAAA	CAATTATACTTCATCACCAA	ATTAATAGTAGCCATATAAA	CAATTATACTTCATCACCAA
mag1_10-2	BY4741	mag1Δ/mag1Δ	a/α	2n	XII	845929	798643	SNP	1	T	A	2	T/A	52.4/47.6	55/50	105	T	52.381	55	A	47.619	50	GTTTTTTTGGCTTACGGATT	TGGCAATGTTTATACTTTAG	GTTTTTTTGGCTTACGGATT	TGGCAATGTTTATACTTTAG
mag1_10-2	BY4741	mag1Δ/mag1Δ	a/α	2n	XII	855812	808526	SNP	1	G	A	1	A	64.5	60	93	A	64.5161	60				TCCCTTTGAAATATGGAGAC	TTCAAAGTCAATTTCCACAC	TCCCTTTGAAATATGGAGAC	TTCAAAGTCAATTTCCACAC
mag1_10-2	BY4741	mag1Δ/mag1Δ	a/α	2n	XII	855995	808709	SNP	1	A	T	2	A/T	50.0/50.0	42/42	84	A	50	42	T	50	42	TTTTAAAATTGCGCTAGACA	GTAAACAGGGATTGCTTAAG	TTTTAAAATTGCGCTAGACA	GTAAACAGGGATTGCTTAAG
mag1_10-2	BY4741	mag1Δ/mag1Δ	a/α	2n	XII	868810	821524	SNP	1	T	C	2	T/C	52.3/47.7	45/41	86	T	52.3256	45	C	47.6744	41	TGAAGTCATTTAAAAATGAG	ACTCTCCCCTAATGGAGGAA	TGAAGTCATTTAAAAATGAG	ACTCTCCCCTAATGGAGGAA
mag1_10-2	BY4741	mag1Δ/mag1Δ	a/α	2n	XII	889017	841733	SNP	1	T	C	1	C	96.2	100	104	C	96.1538	100				AATCAAGTACTTCAACAAAG	TCTTTTGAATTTGGTGAGCT	AATCAAGTACTTCAACAAAG	TCTTTTGAATTTGGTGAGCT
mag1_10-2	BY4741	mag1Δ/mag1Δ	a/α	2n	XII	908455	861171	SNP	1	A	G	2	G/A	54.1/45.9	40/34	74	G	54.0541	40	A	45.9459	34	TCAGGCCAAAATAGAGTTGG	TTCTATGGCGATTCTTAAGA	TCAGGCCAAAATAGAGTTGG	TTCTATGGCGATTCTTAAGA
mag1_10-2	BY4741	mag1Δ/mag1Δ	a/α	2n	XII	923651	876367	SNP	1	T	C	2	T/C	51.0/49.0	49/47	96	T	51.0417	49	C	48.9583	47	TATACTTCACGCTGTTTCAT	CTATGTTCTGACAATTCTTT	TATACTTCACGCTGTTTCAT	CTATGTTCTGACAATTCTTT
mag1_10-2	BY4741	mag1Δ/mag1Δ	a/α	2n	XII	953158	905402	SNP	1	A	G	1	G	95	95	100	G	95	95				AGAACACGAAAGCCCCATTG	TGCTGAAAAAAACTTTGCAA	AGAACACGAAAGCCCCATTG	TGCTGAAAAAAACTTTGCAA
mag1_10-2	BY4741	mag1Δ/mag1Δ	a/α	2n	XII	958546	910790	SNP	1	A	G	2	G/A	53.2/46.8	59/52	111	G	53.1532	59	A	46.8468	52	AGAACCAGAGCCAGAAGATG	CAAAAGGGCCAAGCAACAAA	AGAACCAGAGCCAGAAGATG	CAAAAGGGCCAAGCAACAAA
mag1_10-2	BY4741	mag1Δ/mag1Δ	a/α	2n	XII	958933	911177	SNP	1	A	G	1	G	97.1	100	103	G	97.0874	100				AAAAACATGGTATGCCCTCG	CGATTTTCGAAAAGATAACC	AAAAACATGGTATGCCCTCG	CGATTTTCGAAAAGATAACC
mag1_10-2	BY4741	mag1Δ/mag1Δ	a/α	2n	XII	967430	919674	SNP	1	A	G	2	A/G	50.6/49.4	42/41	83	A	50.6024	42	G	49.3976	41	GGTTAATAAATAAGATAATA	AAGATTCTTCTGAAGGCGTT	GGTTAATAAATAAGATAATA	AAGATTCTTCTGAAGGCGTT
mag1_10-2	BY4741	mag1Δ/mag1Δ	a/α	2n	XII	967506	919750	SNP	1	A	G	2	G/A	52.9/47.1	46/41	87	G	52.8736	46	A	47.1264	41	TGTAAAGGAAATTATAGGCA	ACAAGAGGCGGAAAAAGTGC	TGTAAAGGAAATTATAGGCA	ACAAGAGGCGGAAAAAGTGC
mag1_10-2	BY4741	mag1Δ/mag1Δ	a/α	2n	XII	968524	920768	SNP	1	A	T	2	T/A	53.3/46.7	49/43	92	T	53.2609	49	A	46.7391	43	TTTTTCAGAAGCTTGCACAA	TTTTTAATGCTTGCTGATGA	TTTTTCAGAAGCTTGCACAA	TTTTTAATGCTTGCTGATGA
mag1_10-2	BY4741	mag1Δ/mag1Δ	a/α	2n	XII	983972	935289	SNP	1	A	G	2	A/G	52.4/47.6	55/50	105	A	52.381	55	G	47.619	50	TACGATAGACTCAAATGTGG	TAATATTATGGCTTCGTTTA	TACGATAGACTCAAATGTGG	TAATATTATGGCTTCGTTTA
mag1_10-2	BY4741	mag1Δ/mag1Δ	a/α	2n	XII	1044409	995730	SNP	1	A	T	1	T	97.4	112	115	T	97.3913	112				CGCAATTAGTCAACAACGAT	TCACGATTGAAAAATTTGGC	CGCAATTAGTCAACAACGAT	TCACGATTGAAAAATTTGGC
mag1_10-2	BY4741	mag1Δ/mag1Δ	a/α	2n	XII	1050586	1001907	SNP	1	A	G	2	A/G	52.0/48.0	52/48	100	A	52	52	G	48	48	CTGCTCTGCTTCATCATCAG	AATTAGCACCGTTTTCTGCT	CTGCTCTGCTTCATCATCAG	AATTAGCACCGTTTTCTGCT
mag1_10-2	BY4741	mag1Δ/mag1Δ	a/α	2n	XII	1063636	1014957	SNP	1	A	T	2	T/A	52.0/48.0	51/47	98	T	52.0408	51	A	47.9592	47	CGTCGCGTCGGGCCGTATAG	ATATGCGTCACTTCTAAGAA	CGTCGCGTCGGGCCGTATAG	ATATGCGTCACTTCTAAGAA
mag1_10-2	BY4741	mag1Δ/mag1Δ	a/α	2n	XIII	11854	9035	SNP	1	T	A	2	A/T	52.0/48.0	64/59	123	A	52.0325	64	T	47.9675	59	GCCTGCCTCCTTCAAAATGT	GAAGAAGTTATTTTGGAAGA	GCCTGCCTCCTTCAAAATGT	GAAGAAGTTATTTTGGAAGA
mag1_10-2	BY4741	mag1Δ/mag1Δ	a/α	2n	XIII	37817	34998	SNP	1	A	T	2	T/A	52.1/47.9	61/56	117	T	52.1368	61	A	47.8632	56	AATGGCGGTATTATGCACCT	ACCTGTTCATTCTGCCACAG	AATGGCGGTATTATGCACCT	ACCTGTTCATTCTGCCACAG
mag1_10-2	BY4741	mag1Δ/mag1Δ	a/α	2n	XIII	92627	89808	SNP	1	A	G	1	G	59.1	65	110	G	59.0909	65				ATTACAATTTTACAGTTACA	AATCACAAAAGGCAGAAGAA	ATTACAATTTTACAGTTACA	AATCACAAAAGGCAGAAGAA
mag1_10-2	BY4741	mag1Δ/mag1Δ	a/α	2n	XIII	154309	151490	SNP	1	T	C	2	T/C	54.1/45.9	66/56	122	T	54.0984	66	C	45.9016	56	TTGATATATTCTGTTGAGTT	TTCTACTGAATTCTGTTTGA	TTGATATATTCTGTTGAGTT	TTCTACTGAATTCTGTTTGA
mag1_10-2	BY4741	mag1Δ/mag1Δ	a/α	2n	XIII	157848	155029	SNP	1	C	T	2	T/C	52.9/47.1	54/48	102	T	52.9412	54	C	47.0588	48	TTTTCCAGCGGCAAGAACTC	GGGGTCAGCCTCTTGTACTG	TTTTCCAGCGGCAAGAACTC	GGGGTCAGCCTCTTGTACTG
mag1_10-2	BY4741	mag1Δ/mag1Δ	a/α	2n	XIII	211817	200605	SNP	1	A	G	2	G/A	52.6/47.4	50/45	95	G	52.6316	50	A	47.3684	45	TCATTAGTAAAGTAATCGAG	TCAAGCTGAAGAATTATTAT	TCATTAGTAAAGTAATCGAG	TCAAGCTGAAGAATTATTAT
mag1_10-2	BY4741	mag1Δ/mag1Δ	a/α	2n	XIII	264481	253269	SNP	1	T	C	2	T/C	52.7/47.3	59/53	112	T	52.6786	59	C	47.3214	53	AGTTGGCTTTGACCCATTCA	ACGCTGAAAAATCTAAAATA	AGTTGGCTTTGACCCATTCA	ACGCTGAAAAATCTAAAATA
mag1_10-2	BY4741	mag1Δ/mag1Δ	a/α	2n	XIII	321127	309915	SNP	1	T	A	1	A	55.6	50	90	A	55.5556	50				AGACGTTATATATGGGTTAG	TAGCCAAAAAAATAAAAAAT	AGACGTTATATATGGGTTAG	TAGCCAAAAAAATAAAAAAT
mag1_10-2	BY4741	mag1Δ/mag1Δ	a/α	2n	XIII	325052	313840	SNP	1	T	A	1	A	58	51	88	A	57.9545	51				AGCTGCAAACCTTGGGGCCA	TCACTCTGGCCCTTTGGATT	AGCTGCAAACCTTGGGGCCA	TCACTCTGGCCCTTTGGATT
mag1_10-2	BY4741	mag1Δ/mag1Δ	a/α	2n	XIII	339428	328216	SNP	1	T	C	2	C/T	51.6/48.4	48/45	93	C	51.6129	48	T	48.3871	45	AAGGGAAATATCACCTTGGT	GTGTATATGGGACGTTGTTC	AAGGGAAATATCACCTTGGT	GTGTATATGGGACGTTGTTC
mag1_10-2	BY4741	mag1Δ/mag1Δ	a/α	2n	XIII	352088	340876	SNP	1	T	A	1	A	55.3	52	94	A	55.3191	52				AAACCCAGAAGGCAGCTTTC	TTTTTCCAGAAAGTAAAATA	AAACCCAGAAGGCAGCTTTC	TTTTTCCAGAAAGTAAAATA
mag1_10-2	BY4741	mag1Δ/mag1Δ	a/α	2n	XIII	363052	351463	SNP	1	C	T	1	T	97.9	47	48	T	97.9167	47				GCCCAGCATGTTTTTCTTAA	AATCCAAGTTTGCCATCTTA	GCCCAGCATGTTTTTCTTAA	AATCCAAGTTTGCCATCTTA
mag1_10-2	BY4741	mag1Δ/mag1Δ	a/α	2n	XIII	363102	351513	SNP	1	C	T	1	T	100	46	46	T	100	46				TTAGTACACATCGTTGTGGC	GATGAAACCCTGGTTCGATT	TTAGTACACATCGTTGTGGC	GATGAAACCCTGGTTCGATT
mag1_10-2	BY4741	mag1Δ/mag1Δ	a/α	2n	XIII	381623	366810	SNP	1	T	A	1	A	55.3	47	85	A	55.2941	47				TTTGCTAGAAACTTTCGCTG	CACTTCAAAGAGTTTCTCTA	TTTGCTAGAAACTTTCGCTG	CACTTCAAAGAGTTTCTCTA
mag1_10-2	BY4741	mag1Δ/mag1Δ	a/α	2n	XIII	393622	378809	SNP	1	A	G	2	G/A	52.9/47.1	46/41	87	G	52.8736	46	A	47.1264	41	GGATAAAATGGGAAAGGGAG	ATAAGTTGATGCTTAGTGAA	GGATAAAATGGGAAAGGGAG	ATAAGTTGATGCTTAGTGAA
mag1_10-2	BY4741	mag1Δ/mag1Δ	a/α	2n	XIII	398996	384183	SNP	1	A	T	2	A/T	51.2/48.8	42/40	82	A	51.2195	42	T	48.7805	40	TGGAACAATAGACCTGTTCA	ATTTTTGATACCTATGTGCC	TGGAACAATAGACCTGTTCA	ATTTTTGATACCTATGTGCC
mag1_10-2	BY4741	mag1Δ/mag1Δ	a/α	2n	XIII	412563	397750	SNP	1	T	G	2	T/G	53.6/46.4	45/39	84	T	53.5714	45	G	46.4286	39	CAAGCAATTGGTTCTTCAGT	GTGAAGGTGAAAACTTGAAG	CAAGCAATTGGTTCTTCAGT	GTGAAGGTGAAAACTTGAAG
mag1_10-2	BY4741	mag1Δ/mag1Δ	a/α	2n	XIII	417044	402231	SNP	1	T	C	2	C/T	50.0/50.0	55/55	110	C	50	55	T	50	55	AAAGTTTATCCATATCTTCG	TGTGGTTTTCAGTTCGACAT	AAAGTTTATCCATATCTTCG	TGTGGTTTTCAGTTCGACAT
mag1_10-2	BY4741	mag1Δ/mag1Δ	a/α	2n	XIII	443326	428513	SNP	1	A	T	2	A/T	53.0/47.0	61/54	115	A	53.0435	61	T	46.9565	54	GCTGAAATCCTTTAATGTAG	AAAAGATGCAATAGAATTGC	GCTGAAATCCTTTAATGTAG	AAAAGATGCAATAGAATTGC
mag1_10-2	BY4741	mag1Δ/mag1Δ	a/α	2n	XIII	447275	432462	SNP	1	T	C	2	C/T	52.4/47.6	33/30	63	C	52.381	33	T	47.619	30	CCTTATCAATGTCCAGTTCG	CCTGTGCTTTCTGAAGTTTG	CCTTATCAATGTCCAGTTCG	CCTGTGCTTTCTGAAGTTTG
mag1_10-2	BY4741	mag1Δ/mag1Δ	a/α	2n	XIII	468985	454172	SNP	1	T	C	2	T/C	51.8/48.2	44/41	85	T	51.7647	44	C	48.2353	41	GATAGTAAAGATTGATCACC	ACTATTCTTATTTTAGATCC	GATAGTAAAGATTGATCACC	ACTATTCTTATTTTAGATCC
mag1_10-2	BY4741	mag1Δ/mag1Δ	a/α	2n	XIII	484136	469323	SNP	1	A	G	2	G/A	52.6/47.4	41/37	78	G	52.5641	41	A	47.4359	37	TATTAAGCGTTGCTTTCAAC	TATAGCATACCGCAACACAC	TATTAAGCGTTGCTTTCAAC	TATAGCATACCGCAACACAC
mag1_10-2	BY4741	mag1Δ/mag1Δ	a/α	2n	XIII	510489	495676	SNP	1	A	G	2	G/A	54.3/45.7	51/43	94	G	54.2553	51	A	45.7447	43	AAGTATCGAAAGGAACAAGA	AGATGTTTTCCGGGTAACGA	AAGTATCGAAAGGAACAAGA	AGATGTTTTCCGGGTAACGA
mag1_10-2	BY4741	mag1Δ/mag1Δ	a/α	2n	XIII	513093	498280	SNP	1	A	G	2	G/A	53.2/45.7	50/43	94	G	53.1915	50	A	45.7447	43	CATCACTTACATTGAGGTGA	TATTAAAACCAGTGAAGGTT	CATCACTTACATTGAGGTGA	TATTAAAACCAGTGAAGGTT
mag1_10-2	BY4741	mag1Δ/mag1Δ	a/α	2n	XIII	555612	540799	SNP	1	T	G	2	T/G	50.6/49.4	43/42	85	T	50.5882	43	G	49.4118	42	TCTCTCAATTCAGCGGCAAA	TCGACACCGGTGGGACCACC	TCTCTCAATTCAGCGGCAAA	TCGACACCGGTGGGACCACC
mag1_10-2	BY4741	mag1Δ/mag1Δ	a/α	2n	XIII	555613	540800	SNP	1	T	G	2	T/G	51.2/48.8	44/42	86	T	51.1628	44	G	48.8372	42	CTCTCAATTCAGCGGCAAAT	CGACACCGGTGGGACCACCA	CTCTCAATTCAGCGGCAAAT	CGACACCGGTGGGACCACCA
mag1_10-2	BY4741	mag1Δ/mag1Δ	a/α	2n	XIII	558604	543791	SNP	1	T	C	2	T/C	52.6/47.4	30/27	57	T	52.6316	30	C	47.3684	27	AAGATATACCTCGCCTCTTG	TCATCAGTAACTCTTCTGCA	AAGATATACCTCGCCTCTTG	TCATCAGTAACTCTTCTGCA
mag1_10-2	BY4741	mag1Δ/mag1Δ	a/α	2n	XIII	587004	572193	SNP	1	T	A	2	A/T	50.5/49.5	46/45	91	A	50.5495	46	T	49.4505	45	TACTCACTTACTCTAACGAT	GACTCCTGCTTGGTCAAAAA	TACTCACTTACTCTAACGAT	GACTCCTGCTTGGTCAAAAA
mag1_10-2	BY4741	mag1Δ/mag1Δ	a/α	2n	XIII	592761	577950	SNP	1	A	G	2	G/A	53.3/45.7	49/42	92	G	53.2609	49	A	45.6522	42	ACGTTTTACTAAATTGTTGA	TGTATTTTCTTTATAAACAC	ACGTTTTACTAAATTGTTGA	TGTATTTTCTTTATAAACAC
mag1_10-2	BY4741	mag1Δ/mag1Δ	a/α	2n	XIII	604294	589483	SNP	1	T	A	2	T/A	50.7/49.3	36/35	71	T	50.7042	36	A	49.2958	35	TTGTCTTCACCACCGCTTTC	AATAGGGTATCTTTACCGTA	TTGTCTTCACCACCGCTTTC	AATAGGGTATCTTTACCGTA
mag1_10-2	BY4741	mag1Δ/mag1Δ	a/α	2n	XIII	696283	681472	SNP	1	A	G	2	A/G	51.6/48.4	48/45	93	A	51.6129	48	G	48.3871	45	ACGGCGGATGGCAAAGAACG	TAGAATTCCTTGATGAGAAC	ACGGCGGATGGCAAAGAACG	TAGAATTCCTTGATGAGAAC
mag1_10-2	BY4741	mag1Δ/mag1Δ	a/α	2n	XIII	702430	687619	SNP	1	A	G	2	A/G	50.0/50.0	47/47	94	A	50	47	G	50	47	CTTTATCGACACTGAAATAA	CAGAATCAGAAAACTGGTCG	CTTTATCGACACTGAAATAA	CAGAATCAGAAAACTGGTCG
mag1_10-2	BY4741	mag1Δ/mag1Δ	a/α	2n	XIII	711863	697052	SNP	1	A	T	2	T/A	54.3/45.7	50/42	92	T	54.3478	50	A	45.6522	42	CCTTCAAAATCTGTACTTGA	GAACAGAAACCAAGTATGGA	CCTTCAAAATCTGTACTTGA	GAACAGAAACCAAGTATGGA
mag1_10-2	BY4741	mag1Δ/mag1Δ	a/α	2n	XIII	720663	705852	SNP	1	T	C	2	C/T	51.0/49.0	50/48	98	C	51.0204	50	T	48.9796	48	GGATAGTCCATAGTCGAGTT	TATCGGATCTGAGCAGGTAC	GGATAGTCCATAGTCGAGTT	TATCGGATCTGAGCAGGTAC
mag1_10-2	BY4741	mag1Δ/mag1Δ	a/α	2n	XIII	724254	709443	SNP	1	T	A	2	T/A	50.5/49.5	56/55	111	T	50.4505	56	A	49.5495	55	TTCTTTAGGTTTATCTTTAA	TTAGGCTTTGGTTTGATATC	TTCTTTAGGTTTATCTTTAA	TTAGGCTTTGGTTTGATATC
mag1_10-2	BY4741	mag1Δ/mag1Δ	a/α	2n	XIII	729380	714569	SNP	1	A	T	1	T	58.3	56	96	T	58.3333	56				GTCTTCAATATTAACTAATG	TTTTTTCAAAGTGACATGCA	GTCTTCAATATTAACTAATG	TTTTTTCAAAGTGACATGCA
mag1_10-2	BY4741	mag1Δ/mag1Δ	a/α	2n	XIII	743779	728968	SNP	1	A	G	2	G/A	51.1/48.9	47/45	92	G	51.087	47	A	48.913	45	AAACCTCCATACCGGAAGTG	AAGAAGACGTGATAGGCTAT	AAACCTCCATACCGGAAGTG	AAGAAGACGTGATAGGCTAT
mag1_10-2	BY4741	mag1Δ/mag1Δ	a/α	2n	XIII	752118	737307	SNP	1	A	G	2	G/A	50.5/49.5	51/50	101	G	50.495	51	A	49.505	50	CACAATGGCTGCAAACAGAA	CTTCACATTTTTAGAATCTG	CACAATGGCTGCAAACAGAA	CTTCACATTTTTAGAATCTG
mag1_10-2	BY4741	mag1Δ/mag1Δ	a/α	2n	XIII	816919	802108	SNP	1	A	G	2	G/A	54.9/45.1	56/46	102	G	54.902	56	A	45.098	46	TTGGTCCAATTTCCTCTGCA	AATTTCTTGGGAGTCTGATT	TTGGTCCAATTTCCTCTGCA	AATTTCTTGGGAGTCTGATT
mag1_10-2	BY4741	mag1Δ/mag1Δ	a/α	2n	XIII	839116	824305	SNP	1	A	T	1	T	99	100	101	T	99.0099	100				GAGCATGAAGATATCAGACA	GAAGCATATTCAAAAAGAAA	GAGCATGAAGATATCAGACA	GAAGCATATTCAAAAAGAAA
mag1_10-2	BY4741	mag1Δ/mag1Δ	a/α	2n	XIII	845212	830401	SNP	1	T	C	1	C	99.2	122	123	C	99.187	122				TATCTAGCTCTCGTGTGTGA	CTAGTTCTACTTTTGCTTGC	TATCTAGCTCTCGTGTGTGA	CTAGTTCTACTTTTGCTTGC
mag1_10-2	BY4741	mag1Δ/mag1Δ	a/α	2n	XIII	853666	838855	SNP	1	A	G	1	G	100	116	116	G	100	116				GCGTTCTGCTAAGAATTTGA	ACAGCATCCCTTTATTAAGG	GCGTTCTGCTAAGAATTTGA	ACAGCATCCCTTTATTAAGG
[truncated: 10,842 more rows]
